# Supplementary material for: The development of a new parameter for tracking post-transcriptional regulation allows the detailed map of the Pseudomonas aeruginosa Crc regulon
Source: Sci Rep. 2018 Nov 14;8:16793. doi: 10.1038/s41598-018-34741-9 (PMC6235884; doi:10.1038/s41598-018-34741-9)
Supplement: Supplementary file 1 — Supplementary Information [file 41598_2018_34741_MOESM1_ESM.pdf]

**The development of a new parameter for tracking post-transcriptional regulation allows the detailed map of the *Pseudomonas aeruginosa* Crc regulon.**

Fernando Corona, Jose Antonio Reales-Calderón, Concha Gil, José Luis Martínez

Supplementary information.

Table S1. RPKM values of all *P. aeruginosa* genes

| Transcription Start | Translation Start | Translation Stop | Transcription Stop | Strand | Name  | Synonym      | RPKM PAO1 | RPKM Δcrc |
|---------------------|-------------------|------------------|--------------------|--------|-------|--------------|-----------|-----------|
| 456                 | 483               | 2027             | 2027               | +      | dnaA  | PA0001       | 529       | 559       |
| 2028                | 2056              | 3159             | 3159               | +      | dhnaN | PA0002       | 717       | 651       |
| 3160                | 3169              | 4278             |                    | +      | recF  | PA0003       | 486       | 504       |
|                     | 4275              | 6695             | 6713               | +      | gyrB  | PA0004       | 665       | 579       |
| 7802                | 7791              | 7018             | 7006               | -      | lptA  | PA0005       | 140       | 176       |
| 8353                | 8339              | 7803             | 7803               | -      | -     | PA0006       | 172       | 132       |
| 8463                | 8671              | 10377            | 10433              | +      | -     | PA0007       | 25        | 33        |
|                     | 12488             | 10434            | 10434              | -      | glyS  | PA0008       | 349       | 295       |
| 13435               | 13435             | 12488            |                    | -      | glyQ  | PA0009       | 380       | 341       |
| 13436               | 13540             | 14091            | 14234              | +      | tag   | PA0010       | 39        | 32        |
| 14235               | 14235             | 15122            | 15123              | +      | -     | PA0011       | 130       | 126       |
| 15181               | 15207             | 15473            | 15473              | +      | -     | PA0012       | 123       | 100       |
| 15480               | 15620             | 16273            | 16284              | +      | -     | PA0013       | 71        | 94        |
| 16898               | 16607             | 16335            | 16285              | -      | -     | PA0014       | 26        | 34        |
| 17223               | 17217             | 16900            | 16899              | -      | -     | PA0015       | 99        | 95        |
| 18765               | 18739             | 17366            | 17224              | -      | trkA  | PA0016       | 153       | 150       |
|                     | 20071             | 18767            | 18767              | -      | -     | PA0017       | 120       | 116       |
| 21066               | 21012             | 20068            |                    | -      | fmt   | PA0018       | 111       | 120       |
| 21619               | 21573             |                  | 21067              | -      | def   | PA0019       | 600       | 660       |
| 21620               |                   |                  | 21665              | ?      | -     | predicted RN | 380       | 514       |
| 21672               | 21712             | 22737            | 22737              | +      | -     | PA0020       | 391       | 207       |
|                     | 22872             | 23960            |                    | +      | -     | PA0021       | 5         | 4         |
| 23997               | 24001             | 24558            | 24558              | +      | -     | PA0022       | 139       | 132       |
| 25589               | 25545             | 24568            | 24559              | -      | qor   | PA0023       | 58        | 45        |
| 25715               | 25736             | 26653            | 26710              | +      | hemf  | PA0024       | 227       | 256       |
| 26711               | 26711             | 27535            | 27535              | +      | aroE  | PA0025       | 98        | 108       |
| 27536               | 27646             | 28632            |                    | +      | plcB  | PA0026       | 124       | 31        |
|                     | 28613             | 29899            |                    | +      | -     | PA0027       | 54        | 17        |
|                     | 29896             | 30498            |                    | +      | -     | PA0028       | 38        | 11        |

|       |       |       |   |      |              |     |      |
|-------|-------|-------|---|------|--------------|-----|------|
|       | 32055 | 30502 | - | -    | PA0029       | 9   | 4    |
|       | 32983 | 32060 | - | -    | PA0030       | 6   | 4    |
|       | 34511 | 33000 | - | betC | PA0031       | 15  | 10   |
|       | 34624 | 35538 | + | -    | PA0032       | 28  | 20   |
| 36277 | 36270 | 35905 | - | -    | PA0033       | 49  | 29   |
|       | 36901 | 36278 | - | -    | PA0034       | 22  | 20   |
|       | 37893 | 37087 | - | trpA | PA0035       | 62  | 34   |
| 39098 | 39098 | 37890 | - | trpB | PA0036       | 94  | 45   |
| 39099 | 39202 | 40089 | + | trpI | PA0037       | 44  | 29   |
| 40190 | 40190 | 40405 | + | -    | PA0038       | 114 | 56   |
| 40551 |       | 40560 | ? | -    | predicted RN | 455 | 481  |
| 40561 | 40589 | 40816 | + | -    | PA0039       | 752 | 1098 |
| 40987 | 41113 | 42801 | + | -    | PA0040       | 37  | 38   |
|       | 42914 | 53521 | + | -    | PA0041       | 29  | 24   |
| 56460 | 56546 | 56941 | + | -    | PA0042       | 71  | 80   |
|       | 58594 | 57212 | - | -    | PA0043       | 11  | 8    |
|       | 58786 | 60159 | + | exoT | PA0044       | 69  | 17   |
| 60655 | 60656 | 61342 | + | -    | PA0045       | 387 | 251  |
| 61343 | 61373 | 61726 | + | -    | PA0046       | 508 | 335  |
| 61858 | 61879 | 62388 | + | -    | PA0047       | 295 | 198  |
| 62805 | 62786 | 62403 | - | -    | PA0048       | 105 | 150  |
| 65023 | 64729 | 63068 | - | -    | PA0049       | 15  | 112  |
|       | 65339 | 65479 | + | -    | PA0050       | 8   | 11   |
|       | 66303 | 68135 | + | phzH | PA0051       | 3   | 2    |
|       | 68616 | 68188 | - | -    | PA0052       | 9   | 4    |
| 68857 | 69272 | 69526 | + | -    | PA0053       | 126 | 104  |
| 70091 | 70091 | 69543 | - | -    | PA0054       | 69  | 48   |
| 70667 | 70636 | 70130 | - | -    | PA0055       | 118 | 102  |
|       | 71622 | 70702 | - | -    | PA0056       | 12  | 10   |
|       | 71730 | 72617 | + | -    | PA0057       | 7   | 9    |
|       | 72680 | 73384 | + | -    | PA0058       | 6   | 5    |
|       | 73468 | 73923 | + | osmC | PA0059       | 8   | 7    |

|        |        |        |          |       |        |      |      |
|--------|--------|--------|----------|-------|--------|------|------|
| 74001  | 74034  | 74267  | 74267 +  | -     | PA0060 | 96   | 74   |
| 74772  | 74716  | 74279  | 74268 -  | -     | PA0061 | 52   | 38   |
|        | 75189  | 74773  | -        | -     | PA0062 | 18   | 18   |
| 75201  | 75281  | 76408  | 76415 +  | -     | PA0063 | 61   | 49   |
| 77411  | 77399  | 76416  | 76416 -  | -     | PA0064 | 87   | 75   |
|        | 78097  | 77432  | 77412 -  | -     | PA0065 | 90   | 95   |
| 78640  | 78632  | 78090  | -        | -     | PA0066 | 119  | 112  |
| 78706  | 78710  | 80755  | + +      | prlC  | PA0067 | 223  | 163  |
|        | 80752  | 81027  | 81047 +  | -     | PA0068 | 210  | 169  |
| 81048  | 81116  | 82174  | 82388 +  | -     | PA0069 | 52   | 37   |
| 83379  | 83318  | 82404  | 82392 -  | -     | PA0070 | 791  | 824  |
|        | 85092  | 83380  | 83380 -  | -     | PA0071 | 107  | 107  |
|        | 86284  | 85085  | -        | -     | PA0072 | 35   | 43   |
|        | 87003  | 86284  | -        | -     | PA0073 | 56   | 57   |
| 90098  | 90098  | 87000  | -        | ppkA  | PA0074 | 78   | 70   |
| 90843  | 90834  | 90106  | 90099 -  | pppA  | PA0075 | 82   | 99   |
|        | 91524  | 90844  | 90844 -  | -     | PA0076 | 94   | 101  |
| 94918  | 94826  | 91521  | -        | icmF1 | PA0077 | 109  | 115  |
| 96401  | 96397  | 95048  | 95014 -  | -     | PA0078 | 107  | 103  |
| 97738  | 97738  | 96404  | 96402 -  | -     | PA0079 | 149  | 146  |
| 98262  | 98218  | 97754  | 97739 -  | -     | PA0080 | 150  | 158  |
| 99756  | 99756  | 98263  | 98263 -  | tha1  | PA0081 | 111  | 104  |
| 99952  | 100124 | 101158 | 101158 + | -     | PA0082 | 180  | 180  |
| 101159 | 101247 | 101765 | 101765 + | -     | PA0083 | 526  | 429  |
| 101766 | 101778 | 103274 | 103274 + | -     | PA0084 | 517  | 464  |
| 103282 | 103350 | 103838 | 103838 + | hcp1  | PA0085 | 1397 | 1207 |
| 103839 | 104006 | 104851 | 104852 + | -     | PA0086 | 163  | 191  |
| 104853 | 104853 | 105362 | + +      | -     | PA0087 | 110  | 110  |
|        | 105359 | 107218 | + +      | -     | PA0088 | 88   | 86   |
|        | 107182 | 108228 | + +      | -     | PA0089 | 68   | 63   |
|        | 108221 | 110929 | 110975 + | clpV1 | PA0090 | 143  | 135  |
| 110976 | 110976 | 112907 | 112908 + | vgrG1 | PA0091 | 102  | 104  |

|        |        |        |        |      |      |        |     |     |
|--------|--------|--------|--------|------|------|--------|-----|-----|
| 114604 | 113306 | 113022 | 112966 | -    | -    | PA0092 | 164 | 168 |
| 115072 | 114595 | 113303 | -      | -    | -    | PA0093 | 79  | 79  |
|        | 115045 | 114611 | 114611 | -    | -    | PA0094 | 131 | 119 |
|        | 115299 | 117524 | +      | -    | -    | PA0095 | 55  | 24  |
|        | 117552 | 118001 | +      | -    | -    | PA0096 | 21  | 10  |
|        | 117931 | 119130 | +      | -    | -    | PA0097 | 18  | 8   |
|        | 119127 | 120164 | +      | -    | -    | PA0098 | 17  | 8   |
| 121325 | 120164 | 121324 | +      | -    | -    | PA0099 | 40  | 21  |
|        | 121346 | 122266 | +      | -    | -    | PA0100 | 83  | 46  |
|        | 122248 | 123495 | +      | -    | -    | PA0101 | 26  | 13  |
| 123866 | 123871 | 124599 | +      | -    | -    | PA0102 | 231 | 199 |
|        | 124810 | 126381 | +      | -    | -    | PA0103 | 27  | 16  |
| 126447 | 126518 | 127114 | +      | -    | -    | PA0104 | 67  | 46  |
|        | 127378 | 128502 | +      | coxB | coxB | PA0105 | 19  | 12  |
|        | 128512 | 130104 | +      | coxA | coxA | PA0106 | 9   | 5   |
|        | 130115 | 130669 | +      | -    | -    | PA0107 | 6   | 4   |
|        | 130680 | 131567 | +      | coll | coll | PA0108 | 5   | 3   |
|        | 131792 | 131583 | -      | -    | -    | PA0109 | 15  | 13  |
|        | 131808 | 132602 | +      | -    | -    | PA0110 | 2   | 2   |
|        | 132577 | 133155 | +      | -    | -    | PA0111 | 2   | 1   |
|        | 133220 | 134293 | +      | -    | -    | PA0112 | 3   | 3   |
|        | 134319 | 135233 | +      | -    | -    | PA0113 | 14  | 8   |
| 135234 | 135259 | 135894 | +      | senc | senc | PA0114 | 99  | 66  |
| 136391 | 136386 | 135934 | -      | -    | -    | PA0115 | 92  | 58  |
| 136518 | 136518 | 136991 | +      | -    | -    | PA0116 | 76  | 63  |
|        | 137248 | 137976 | +      | -    | -    | PA0117 | 29  | 22  |
|        | 138001 | 138588 | +      | -    | -    | PA0118 | 34  | 27  |
|        | 138818 | 140167 | +      | -    | -    | PA0119 | 36  | 16  |
|        | 140216 | 140902 | +      | -    | -    | PA0120 | 26  | 27  |
|        | 141003 | 141737 | +      | -    | -    | PA0121 | 20  | 19  |
| 141817 | 141917 | 142327 | +      | -    | -    | PA0122 | 80  | 45  |
| 143267 | 143267 | 142359 | -      | -    | -    | PA0123 | 36  | 35  |

|        |        |        |        |      |        |        |      |     |
|--------|--------|--------|--------|------|--------|--------|------|-----|
| 144095 | 143848 | 143567 | 143268 | -    | -      | PA0124 | 79   | 70  |
| 144095 | 144072 | 143845 | -      | -    | -      | PA0125 | 75   | 75  |
| 144892 | 144868 | 144248 | 144248 | -    | -      | PA0126 | 246  | 249 |
| 145539 | 144969 | 145469 | +      | -    | -      | PA0127 | 32   | 19  |
| 145539 | 145542 | 145883 | 145883 | +    | -      | PA0128 | 222  | 282 |
| 149102 | 147392 | 145965 | -      | gabp | PA0129 | 37     | 31   | 31  |
| 149102 | 149054 | 147561 | 147553 | -    | -      | PA0130 | 85   | 42  |
|        | 149425 | 149138 | -      | -    | -      | PA0131 | 50   | 21  |
|        | 150771 | 149425 | -      | -    | -      | PA0132 | 59   | 23  |
|        | 150906 | 151823 | +      | -    | -      | PA0133 | 32   | 21  |
|        | 153306 | 151936 | -      | -    | -      | PA0134 | 17   | 16  |
|        | 153696 | 153836 | +      | -    | -      | PA0135 | 2    | 0   |
|        | 154417 | 155988 | +      | -    | -      | PA0136 | 2    | 2   |
|        | 155988 | 157085 | +      | -    | -      | PA0137 | 3    | 2   |
| 158171 | 157108 | 158034 | +      | -    | -      | PA0138 | 8    | 6   |
| 158763 | 158199 | 158762 | +      | ahpc | PA0139 | 2404   | 1700 |     |
| 161502 | 158907 | 160472 | 160492 | +    | ahpf   | PA0140 | 132  | 141 |
|        | 161448 | 160552 | 160497 | -    | -      | PA0141 | 118  | 154 |
| 163361 | 161906 | 163255 | +      | -    | -      | PA0142 | 26   | 19  |
| 165099 | 163363 | 164415 | 164442 | +    | nuh    | PA0143 | 115  | 90  |
| 165763 | 165069 | 164443 | 164443 | -    | -      | PA0144 | 71   | 56  |
|        | 165737 | 165219 | 165100 | -    | -      | PA0145 | 50   | 34  |
|        | 165976 | 167073 | +      | -    | -      | PA0146 | 7    | 6   |
| 168152 | 167146 | 168108 | +      | -    | -      | PA0147 | 14   | 7   |
| 169164 | 168213 | 169163 | 169163 | +    | -      | PA0148 | 90   | 55  |
|        | 169361 | 169906 | +      | -    | -      | PA0149 | 25   | 28  |
|        | 169903 | 170898 | +      | -    | -      | PA0150 | 28   | 29  |
|        | 171047 | 173434 | +      | -    | -      | PA0151 | 5    | 4   |
|        | 173811 | 174638 | +      | pcaQ | PA0152 | 38     | 20   |     |
|        | 174773 | 175492 | +      | pcaH | PA0153 | 6      | 4    |     |
|        | 175503 | 176108 | +      | pcaG | PA0154 | 16     | 7    |     |
| 176299 | 176315 | 177154 | 177306 | +    | pcaR   | PA0155 | 56   | 50  |

|        |        |        |   |      |        |     |     |
|--------|--------|--------|---|------|--------|-----|-----|
| 177307 | 177307 | 178458 | + | -    | PA0156 | 48  | 47  |
|        | 178455 | 179525 | + | -    | PA0157 | 50  | 43  |
|        | 179522 | 182569 | + | -    | PA0158 | 66  | 52  |
| 182586 | 182768 | 183706 | + | -    | PA0159 | 59  | 50  |
| 183810 | 183822 | 184007 | + | -    | PA0160 | 37  | 97  |
| 184226 | 184287 | 184439 | + | -    | PA0161 | 91  | 274 |
| 184557 | 184594 | 185928 | + | opdc | PA0162 | 119 | 172 |
| 186831 | 186754 | 185957 | - | -    | PA0163 | 50  | 44  |
|        | 186832 | 188448 | + | -    | PA0164 | 59  | 15  |
| 188765 | 189120 | 189956 | + | -    | PA0165 | 299 | 215 |
|        | 190198 | 191604 | + | -    | PA0166 | 5   | 3   |
| 191686 | 191697 | 192362 | + | -    | PA0167 | 106 | 56  |
| 192363 | 192368 | 192958 | + | -    | PA0168 | 58  | 44  |
| 193672 | 193672 | 192965 | - | -    | PA0169 | 55  | 133 |
| 194179 | 194179 | 193799 | - | -    | PA0170 | 53  | 139 |
| 194756 | 194748 | 194206 | - | -    | PA0171 | 49  | 139 |
| 196814 | 196748 | 194757 | - | -    | PA0172 | 25  | 52  |
|        | 198060 | 197011 | - | -    | PA0173 | 1   | 2   |
|        | 198682 | 198080 | - | -    | PA0174 | 2   | 2   |
|        | 199530 | 198688 | - | -    | PA0175 | 3   | 4   |
|        | 201639 | 199600 | - | aer2 | PA0176 | 7   | 6   |
|        | 202160 | 201675 | - | -    | PA0177 | 7   | 9   |
|        | 204066 | 202147 | - | -    | PA0178 | 7   | 7   |
|        | 204459 | 204094 | - | -    | PA0179 | 27  | 13  |
|        | 205829 | 204657 | - | cttp | PA0180 | 24  | 19  |
|        | 206954 | 206022 | - | -    | PA0181 | 38  | 21  |
|        | 207071 | 207823 | + | -    | PA0182 | 14  | 10  |
|        | 209533 | 207923 | - | atsA | PA0183 | 11  | 8   |
|        | 210460 | 209621 | - | -    | PA0184 | 7   | 5   |
|        | 212073 | 210457 | - | -    | PA0185 | 5   | 4   |
|        | 212340 | 213401 | + | -    | PA0186 | 8   | 8   |
|        | 213819 | 214634 | + | -    | PA0187 | 2   | 0   |

|                  |        |        |   |       |          |     |    |
|------------------|--------|--------|---|-------|----------|-----|----|
| 223742           | 214631 | 215512 | + | -     | PA0188   | 4   | 4  |
|                  | 216908 | 215550 | - | -     | PA0189   | 4   | 2  |
|                  | 217156 | 217881 | + | -     | PA0190   | 8   | 4  |
|                  | 218822 | 217905 | - | -     | PA0191   | 8   | 6  |
|                  | 219172 | 221544 | + | -     | PA0192   | 3   | 2  |
|                  | 221585 | 222487 | + | -     | PA0193   | 5   | 3  |
|                  | 222555 | 223454 | + | -     | PA0194   | 5   | 3  |
|                  | 224101 | 225219 | + | pntAA | PA0195   | 19  | 55 |
|                  | 225295 | 225603 | + | pntAB | PA0195.1 | 24  | 33 |
|                  | 225603 | 227039 | + | pntB  | PA0196   | 12  | 29 |
| 229747<br>229924 | 227382 | 228194 | + | tonB2 | PA0197   | 1   | 2  |
|                  | 228223 | 228942 | + | exbB1 | PA0198   | 4   | 3  |
|                  | 228944 | 229345 | + | exbD1 | PA0199   | 14  | 10 |
|                  | 229738 | 229526 | - | -     | PA0200   | 212 | 42 |
|                  | 229954 | 230535 | + | -     | PA0201   | 56  | 39 |
|                  | 232000 | 230543 | - | -     | PA0202   | 7   | 10 |
|                  | 233100 | 232066 | - | -     | PA0203   | 3   | 10 |
|                  | 233932 | 233123 | - | -     | PA0204   | 5   | 6  |
|                  | 234849 | 233929 | - | -     | PA0205   | 11  | 9  |
|                  | 235987 | 234875 | - | -     | PA0206   | 9   | 14 |
|                  | 236218 | 237111 | + | -     | PA0207   | 19  | 10 |
|                  | 237232 | 238896 | + | mdcA  | PA0208   | 27  | 18 |
|                  | 238896 | 239777 | + | -     | PA0209   | 2   | 10 |
|                  | 239779 | 240078 | + | mdcC  | PA0210   | 2   | 14 |
|                  | 240071 | 240934 | + | mdcD  | PA0211   | 5   | 16 |
|                  | 240931 | 241737 | + | mdcE  | PA0212   | 5   | 14 |
|                  | 241753 | 242445 | + | -     | PA0213   | 6   | 14 |
|                  | 242442 | 243374 | + | -     | PA0214   | 10  | 13 |
|                  | 243431 | 243835 | + | -     | PA0215   | 19  | 12 |
|                  | 243841 | 244605 | + | -     | PA0216   | 7   | 13 |
|                  | 245619 | 244690 | - | -     | PA0217   | 23  | 14 |
|                  | 246868 | 245948 | - | -     | PA0218   | 24  | 13 |

|        |        |        |   |       |        |    |    |
|--------|--------|--------|---|-------|--------|----|----|
|        | 247219 | 248709 | + | -     | PA0219 | 4  | 3  |
|        | 248767 | 250200 | + | -     | PA0220 | 6  | 2  |
|        | 250231 | 251613 | + | -     | PA0221 | 4  | 5  |
|        | 251777 | 252835 | + | -     | PA0222 | 1  | 2  |
|        | 253794 | 252913 | - | -     | PA0223 | 12 | 9  |
|        | 254636 | 253854 | - | -     | PA0224 | 12 | 11 |
| 254637 | 254791 | 255330 | + | -     | PA0225 | 58 | 39 |
|        | 255481 | 256332 | + | -     | PA0226 | 10 | 11 |
|        | 256329 | 257111 | + | -     | PA0227 | 7  | 6  |
|        | 257108 | 258313 | + | pcaF  | PA0228 | 9  | 8  |
|        | 258463 | 259761 | + | pcaT  | PA0229 | 7  | 4  |
|        | 259784 | 261163 | + | pcaB  | PA0230 | 17 | 10 |
|        | 261179 | 261970 | + | pcaD  | PA0231 | 19 | 12 |
| 261981 | 261981 | 262382 | + | pcaC  | PA0232 | 22 | 17 |
|        | 262557 | 263498 | + | -     | PA0233 | 33 | 18 |
|        | 263689 | 264522 | + | -     | PA0234 | 9  | 13 |
|        | 266310 | 264964 | - | pcaK  | PA0235 | 5  | 6  |
| 266607 | 266616 | 267395 | + | -     | PA0236 | 38 | 44 |
|        | 267638 | 268681 | + | -     | PA0237 | 1  | 3  |
|        | 268704 | 269519 | + | -     | PA0238 | 4  | 4  |
|        | 269669 | 270547 | + | -     | PA0239 | 15 | 13 |
|        | 271838 | 270573 | - | -     | PA0240 | 8  | 9  |
|        | 273229 | 271904 | - | -     | PA0241 | 3  | 3  |
|        | 273775 | 275679 | + | -     | PA0242 | 3  | 3  |
| 275754 | 275772 | 276440 | + | -     | PA0243 | 51 | 42 |
|        | 277334 | 276480 | - | -     | PA0244 | 8  | 5  |
|        | 277777 | 277331 | - | aroQ2 | PA0245 | 11 | 8  |
|        | 279399 | 277894 | - | -     | PA0246 | 31 | 23 |
|        | 280758 | 279574 | - | pobA  | PA0247 | 8  | 9  |
| 280772 | 280936 | 281802 | + | -     | PA0248 | 38 | 22 |
|        | 282245 | 281799 | - | -     | PA0249 | 27 | 29 |
| 282781 | 282757 | 282323 | - | -     | PA0250 | 41 | 24 |

|        |        |        |          |      |              |     |     |
|--------|--------|--------|----------|------|--------------|-----|-----|
|        | 283553 | 282912 | -        | -    | PA0251       | 7   | 4   |
|        | 284105 | 283818 | -        | -    | PA0252       | 18  | 19  |
| 284713 | 284673 | 284197 | 284106 - | -    | PA0253       | 39  | 34  |
|        | 286204 | 284714 | -        | -    | PA0254       | 13  | 11  |
| 287071 | 287024 | 286338 | 286205 - | -    | PA0255       | 46  | 37  |
|        | 288120 | 287188 | -        | -    | PA0256       | 22  | 10  |
| 289175 | 289175 | 288384 | 288384 - | -    | PA0257       | 34  | 24  |
| 289392 | 289390 | 289205 | 289176 - | -    | PA0258       | 106 | 65  |
| 291004 | 291004 | 289562 | 289562 - | -    | PA0259       | 101 | 73  |
|        | 293304 | 291154 | 291044 - | -    | PA0260       | 70  | 54  |
|        | 293798 | 293301 | -        | -    | PA0261       | 34  | 27  |
|        | 296861 | 293802 | 293802 - | -    | PA0262       | 24  | 16  |
|        | 297561 | 297043 | -        | hcpc | PA0263       | 10  | 6   |
| 298892 |        |        | 298816 - | -    | PA0263.1     | 60  | 92  |
| 299497 | 299497 | 299081 | 299081 - | -    | PA0264       | 163 | 65  |
| 299498 | 299522 | 300973 | 301004 + | gabD | PA0265       | 314 | 116 |
| 301085 |        |        | 301160 ? | -    | predicted RN | 500 | 196 |
| 301161 | 301218 | 302498 | 302522 + | gabT | PA0266       | 573 | 177 |
| 302657 | 302824 | 304023 | 304176 + | -    | PA0267       | 54  | 43  |
|        | 305598 | 304177 | -        | -    | PA0268       | 18  | 14  |
|        | 305725 | 306162 | +        | -    | PA0269       | 36  | 19  |
| 306174 | 306174 | 306581 | 306581 + | -    | PA0270       | 35  | 21  |
|        | 306615 | 306899 | +        | -    | PA0271       | 24  | 25  |
|        | 307828 | 306896 | -        | -    | PA0272       | 32  | 20  |
|        | 309092 | 307878 | -        | -    | PA0273       | 1   | 1   |
|        | 310025 | 309255 | -        | -    | PA0274       | 6   | 2   |
|        | 310820 | 310134 | -        | -    | PA0275       | 41  | 14  |
|        | 310896 | 311411 | +        | -    | PA0276       | 13  | 11  |
| 312278 | 312209 | 311451 | 311444 - | -    | PA0277       | 216 | 296 |
|        | 313133 | 312381 | -        | -    | PA0278       | 7   | 5   |
|        | 313227 | 313925 | 313925 + | -    | PA0279       | 23  | 16  |
| 314930 | 314927 | 313938 | 313926 - | cysA | PA0280       | 35  | 56  |

|        |        |        |          |      |              |     |     |
|--------|--------|--------|----------|------|--------------|-----|-----|
| 315800 | 315800 | 314931 | 314931 - | cysW | PA0281       | 33  | 41  |
| 316790 | 316629 | 315811 | 315801 - | cysT | PA0282       | 29  | 31  |
| 317797 | 317789 | 316791 | 316791 - | sbp  | PA0283       | 33  | 40  |
| 318169 | 318148 | 317966 | 317899 - | -    | PA0284       | 66  | 88  |
| 320634 | 320594 | 318312 | 318191 - | -    | PA0285       | 77  | 52  |
| 320747 | 320766 | 321944 | 321970 + | desA | PA0286       | 253 | 236 |
|        | 322175 | 323560 | +        | gpup | PA0287       | 3   | 2   |
|        | 323616 | 324572 | +        | gpuA | PA0288       | 9   | 7   |
|        | 324625 | 325587 | +        | gpuR | PA0289       | 23  | 13  |
|        | 325700 | 326671 | +        | -    | PA0290       | 19  | 10  |
| 326848 | 327284 | 328666 | 328674 + | opre | PA0291       | 674 | 604 |
| 329909 | 329907 | 328801 | 328791 - | aguA | PA0292       | 143 | 127 |
| 330933 | 330871 | 329993 | 329993 - | agub | PA0293       | 57  | 64  |
|        | 331699 | 331034 | -        | agur | PA0294       | 33  | 29  |
| 332886 | 332823 | 331762 | 331719 - | -    | PA0295       | 121 | 57  |
| 334733 | 334455 | 333079 | 333079 - | spul | PA0296       | 327 | 204 |
| 334734 | 334734 | 335486 | 335526 + | spuA | PA0297       | 150 | 105 |
| 335527 | 335527 | 336885 | 336885 + | spuB | PA0298       | 159 | 112 |
| 336886 | 336951 | 338321 | 338367 + | spuC | PA0299       | 268 | 181 |
| 338383 |        |        | 338410 ? | -    | predicted RN | 351 | 384 |
| 338411 | 338437 | 339540 | 339591 + | spuD | PA0300       | 485 | 478 |
| 339749 | 339959 | 341056 | 341056 + | spuE | PA0301       | 148 | 112 |
| 341110 | 341111 | 342265 | 342285 + | spuF | PA0302       | 157 | 110 |
| 342286 | 342292 | 343173 | 343255 + | spuG | PA0303       | 186 | 139 |
| 343256 | 343256 | 344125 | 344126 + | spuH | PA0304       | 153 | 124 |
|        | 346690 | 344303 | -        | -    | PA0305       | 21  | 14  |
|        | 346801 | 347853 | +        | -    | PA0306       | 37  | 24  |
|        | 349051 | 348440 | 347854 - | -    | PA0307       | 36  | 32  |
|        | 349050 | 350069 | 350088 + | -    | PA0308       | 62  | 51  |
| 350857 | 350841 | 350089 | 350089 - | -    | PA0309       | 65  | 70  |
| 350890 | 350890 | 351588 | 351609 + | -    | PA0310       | 66  | 38  |
|        | 352164 | 351610 | -        | -    | PA0311       | 16  | 10  |

|        |        |        |          |       |        |     |     |
|--------|--------|--------|----------|-------|--------|-----|-----|
| 352284 | 352430 | 352924 | 352926 + | -     | PA0312 | 92  | 61  |
| 353673 | 353619 | 352927 | 352927 - | -     | PA0313 | 65  | 56  |
| 354538 | 354461 | 353691 | 353680 - | -     | PA0314 | 76  | 74  |
| 354652 | 354754 | 355191 | 355206 + | -     | PA0315 | 282 | 135 |
| 356580 | 356477 | 355248 | 355248 - | serA  | PA0316 | 762 | 824 |
| 356633 | 356681 | 358075 | 358075 + | -     | PA0317 | 292 | 255 |
| 358094 | 358167 | 358832 | 358832 + | -     | PA0318 | 125 | 78  |
| 358833 | 358931 | 359920 | 359981 + | -     | PA0319 | 97  | 85  |
|        | 359982 | 360332 | +        | -     | PA0320 | 25  | 23  |
|        | 361447 | 360413 | -        | -     | PA0321 | 6   | 9   |
|        | 362857 | 361463 | -        | -     | PA0322 | 5   | 4   |
|        | 364321 | 363278 | -        | -     | PA0323 | 7   | 6   |
|        | 365157 | 364369 | -        | -     | PA0324 | 8   | 4   |
|        | 366083 | 365154 | -        | -     | PA0325 | 9   | 7   |
|        | 367129 | 366080 | -        | -     | PA0326 | 4   | 2   |
| 367457 | 367457 | 368422 | +        | -     | PA0327 | 19  | 7   |
|        | 370405 | 368462 | 368462 - | -     | PA0328 | 31  | 7   |
| 371072 | 371038 | 370706 | 370706 - | -     | PA0329 | 183 | 173 |
| 371864 | 371833 | 371162 | 371162 - | rpIA  | PA0330 | 236 | 222 |
| 372082 | 372091 | 373605 | 373605 + | ilvA1 | PA0331 | 179 | 157 |
| 373722 | 373725 | 374192 | 374242 + | -     | PA0332 | 93  | 75  |
| 374243 | 374243 | 375514 | 375950 + | -     | PA0333 | 47  | 43  |
| 377189 | 377189 | 375951 | 375951 - | -     | PA0334 | 38  | 26  |
| 377954 | 377892 | 377239 | 377190 - | -     | PA0335 | 106 | 50  |
| 378096 | 378096 | 378575 | 378597 + | vgdP  | PA0336 | 593 | 491 |
| 378598 | 378598 | 380877 | 380877 + | ptsp  | PA0337 | 249 | 232 |
| 380878 | 380903 | 382033 | 382036 + | -     | PA0338 | 41  | 39  |
|        | 382792 | 382037 | 382037 - | -     | PA0339 | 32  | 17  |
| 382892 | 382914 | 383717 | 383717 + | -     | PA0340 | 40  | 40  |
| 383722 | 383727 | 384527 | 384545 + | lgt   | PA0341 | 115 | 114 |
| 384715 | 384733 | 385527 | 385553 + | thvA  | PA0342 | 215 | 202 |
| 386385 | 386351 | 385554 | 385554 - | -     | PA0343 | 95  | 90  |

|        |        |        |          |      |        |     |     |
|--------|--------|--------|----------|------|--------|-----|-----|
|        | 387765 | 386386 | -        | -    | PA0344 | 21  | 13  |
|        | 389143 | 387758 | -        | -    | PA0345 | 21  | 12  |
| 389262 | 389334 | 389696 | 389732 + | -    | PA0346 | 39  | 40  |
|        | 390884 | 389733 | -        | glpQ | PA0347 | 14  | 17  |
|        | 391094 | 392188 | +        | -    | PA0348 | 6   | 6   |
|        | 392185 | 393225 | +        | -    | PA0349 | 5   | 5   |
| 393298 | 393308 | 393814 | 393821 + | folA | PA0350 | 100 | 106 |
| 394441 | 394303 | 393830 | -        | -    | PA0351 | 85  | 55  |
| 395832 | 395827 | 394442 | -        | -    | PA0352 | 101 | 123 |
| 398047 | 397895 | 396057 | -        | ilvD | PA0353 | 160 | 113 |
| 399425 | 399420 | 398224 | 398223 - | -    | PA0354 | 134 | 115 |
|        | 400032 | 399493 | -        | pfpI | PA0355 | 9   | 6   |
| 400191 | 400248 | 401072 | +        | -    | PA0356 | 128 | 133 |
| 401073 | 401131 | 401943 | 401973 + | mutM | PA0357 | 117 | 103 |
| 401998 | 402020 | 402598 | 402657 + | -    | PA0358 | 57  | 131 |
| 402663 | 402681 | 403025 | +        | -    | PA0359 | 406 | 144 |
| 403033 | 403295 | 404281 | +        | -    | PA0360 | 63  | 42  |
| 406189 | 406119 | 404386 | 404282 - | -    | PA0361 | 50  | 43  |
| 406498 | 406498 | 406247 | -        | fdx1 | PA0362 | 259 | 257 |
| 407110 | 407098 | 406619 | 406536 - | coad | PA0363 | 269 | 239 |
|        | 408845 | 407250 | -        | -    | PA0364 | 11  | 11  |
|        | 409449 | 408901 | -        | -    | PA0365 | 15  | 17  |
|        | 410934 | 409504 | -        | -    | PA0366 | 17  | 7   |
| 411073 | 411224 | 411871 | 411899 + | -    | PA0367 | 61  | 41  |
| 413327 | 413327 | 412329 | -        | -    | PA0368 | 42  | 34  |
| 413877 | 413654 | 413364 | -        | -    | PA0369 | 35  | 37  |
|        | 414529 | 413933 | 413930 - | -    | PA0370 | 91  | 88  |
|        | 416016 | 414529 | -        | -    | PA0371 | 81  | 82  |
| 417446 | 417406 | 416009 | -        | -    | PA0372 | 95  | 91  |
| 417508 | 417527 | 418894 | +        | ftsY | PA0373 | 217 | 223 |
|        | 418891 | 419562 | +        | ftsE | PA0374 | 265 | 273 |
|        | 419562 | 420569 | 420682 + | ftsX | PA0375 | 204 | 244 |

|        |        |        |          |       |        |      |      |
|--------|--------|--------|----------|-------|--------|------|------|
| 420683 | 420683 | 421537 | 421537 + | rpoh  | PA0376 | 1024 | 1096 |
| 421538 | 421602 | 422207 | 422207 + | -     | PA0377 | 41   | 48   |
| 422972 | 422943 | 422212 | 422208 - | -     | PA0378 | 53   | 61   |
| 422980 | 422980 | 423357 | 423451 + | -     | PA0379 | 80   | 67   |
| 423460 | 423460 | 423660 | 423689 + | -     | PA0380 | 217  | 278  |
| 423690 | 423719 | 424516 | 424523 + | thig  | PA0381 | 266  | 282  |
| 424582 | 424670 | 425341 | 425503 + | mica  | PA0382 | 199  | 215  |
|        | 425504 | 426850 | +        | -     | PA0383 | 21   | 23   |
|        | 427120 | 426863 | -        | -     | PA0384 | 27   | 27   |
| 427515 | 427505 | 427182 | 427121 - | -     | PA0385 | 61   | 59   |
| 428860 | 428740 | 427586 | 427516 - | -     | PA0386 | 42   | 48   |
|        | 429454 | 428861 | 428861 - | -     | PA0387 | 254  | 267  |
| 429870 | 429870 | 429451 | -        | -     | PA0388 | 250  | 273  |
| 430622 | 430622 | 430002 | 429925 - | -     | PA0389 | 178  | 171  |
| 431772 | 431769 | 430630 | 430629 - | metX  | PA0390 | 186  | 197  |
| 434185 | 433825 | 431858 | 431852 - | -     | PA0391 | 109  | 46   |
| 434821 | 434819 | 434226 | 434205 - | -     | PA0392 | 252  | 259  |
| 435651 | 435651 | 434830 | 434825 - | proC  | PA0393 | 186  | 178  |
| 436569 | 436355 | 435663 | 435652 - | -     | PA0394 | 142  | 160  |
| 436570 | 436570 | 437604 | 437604 + | pilT  | PA0395 | 181  | 91   |
| 437727 | 437782 | 438930 | 438937 + | pilU  | PA0396 | 193  | 48   |
|        | 439837 | 438938 | 438938 - | -     | PA0397 | 34   | 18   |
| 439989 | 439991 | 440395 | 440404 + | -     | PA0398 | 128  | 95   |
| 440623 | 440638 | 442011 | +        | -     | PA0399 | 142  | 109  |
|        | 442008 | 443192 | 443364 + | -     | PA0400 | 145  | 114  |
|        | 444690 | 443419 | 443413 - | -     | PA0401 | 141  | 132  |
| 445691 | 445691 | 444687 | -        | pyrB  | PA0402 | 188  | 185  |
| 446250 | 446227 | 445715 | 445692 - | pyrR  | PA0403 | 102  | 77   |
|        | 446773 | 446339 | 446281 - | -     | PA0404 | 70   | 63   |
| 447342 | 447342 | 446773 | -        | -     | PA0405 | 154  | 120  |
| 448403 | 448350 | 447391 | 447343 - | tonB3 | PA0406 | 51   | 34   |
| 449571 | 449384 | 448431 | 448431 - | gshB  | PA0407 | 252  | 102  |

|        |        |        |          |      |        |      |     |
|--------|--------|--------|----------|------|--------|------|-----|
| 449581 | 449639 | 450046 | 450046 + | pilG | PA0408 | 1061 | 593 |
| 450047 | 450093 | 450458 | 450508 + | pilH | PA0409 | 710  | 401 |
| 450509 | 450509 | 451045 | 451070 + | pilI | PA0410 | 246  | 170 |
| 451085 | 451130 | 453178 | 453178 + | pilJ | PA0411 | 426  | 243 |
| 453179 | 453239 | 454114 | 454125 + | pilK | PA0412 | 130  | 81  |
| 454126 | 454126 | 461544 | +        | chpA | PA0413 | 170  | 105 |
|        | 461537 | 462568 | +        | chpB | PA0414 | 107  | 74  |
|        | 462565 | 463071 | 463072 + | chpC | PA0415 | 111  | 71  |
| 463079 | 463079 | 463873 | +        | chpD | PA0416 | 42   | 24  |
|        | 463949 | 464560 | +        | chpE | PA0417 | 22   | 14  |
|        | 465983 | 464568 | -        | -    | PA0418 | 42   | 36  |
| 466832 | 466740 | 466018 | 466009 - | -    | PA0419 | 88   | 121 |
| 468250 | 468236 | 466833 | 466833 - | bioA | PA0420 | 115  | 128 |
| 468405 | 468410 | 469900 | 469971 + | -    | PA0421 | 143  | 168 |
| 470081 | 470081 | 470650 | 470650 + | -    | PA0422 | 181  | 151 |
| 470651 | 470662 | 471237 | 471242 + | pasP | PA0423 | 1119 | 937 |
| 471987 | 471749 | 471306 | 471306 - | mexR | PA0424 | 96   | 85  |
| 472005 | 472024 | 473175 | 473175 + | mexA | PA0425 | 307  | 516 |
| 473176 | 473191 | 476331 | 476332 + | mexB | PA0426 | 302  | 492 |
| 476333 | 476333 | 477790 | 477802 + | oprM | PA0427 | 303  | 487 |
| 479805 | 479805 | 477886 | 477847 - | -    | PA0428 | 455  | 370 |
| 481193 | 481126 | 480056 | 479829 - | -    | PA0429 | 320  | 290 |
| 482084 | 482068 | 481196 | 481196 - | metF | PA0430 | 203  | 190 |
| 482705 | 482665 | 482111 | 482085 - | -    | PA0431 | 252  | 235 |
| 484263 | 484115 | 482706 | 482706 - | sahH | PA0432 | 839  | 724 |
|        | 484404 | 484838 | +        | -    | PA0433 | 11   | 17  |
|        | 484964 | 487156 | +        | -    | PA0434 | 5    | 13  |
|        | 487167 | 488645 | +        | -    | PA0435 | 3    | 9   |
| 488725 | 488730 | 489350 | 489356 + | -    | PA0436 | 146  | 83  |
|        | 490658 | 489387 | 489387 - | codA | PA0437 | 107  | 98  |
| 491938 | 491898 | 490648 | -        | codB | PA0438 | 42   | 45  |
|        | 493357 | 492080 | -        | -    | PA0439 | 4    | 2   |

|        |        |        |          |      |          |       |      |
|--------|--------|--------|----------|------|----------|-------|------|
|        | 494721 | 493354 | -        | -    | PA0440   | 7     | 5    |
|        | 496255 | 494816 | -        | dht  | PA0441   | 6     | 6    |
|        | 496478 | 496362 | -        | -    | PA0442   | 1     | 4    |
|        | 496871 | 498361 | +        | -    | PA0443   | 4     | 2    |
|        | 498420 | 499703 | +        | -    | PA0444   | 9     | 9    |
|        | 501120 | 500104 | -        | -    | PA0445   | 19    | 17   |
| 502718 | 502599 | 501376 | 501121 - | -    | PA0446   | 30    | 90   |
| 503938 | 503900 | 502719 | 502719 - | gcdH | PA0447   | 34    | 202  |
| 504039 | 504121 | 505029 | 505046 + | -    | PA0448   | 50    | 42   |
| 505047 | 505047 | 505586 | 505591 + | -    | PA0449   | 202   | 179  |
|        | 507251 | 505629 | -        | -    | PA0450   | 14    | 17   |
|        | 507631 | 508962 | +        | -    | PA0451   | 4     | 2    |
|        | 508959 | 509753 | +        | -    | PA0452   | 4     | 5    |
|        | 510499 | 509825 | -        | -    | PA0453   | 24    | 10   |
|        | 512790 | 510589 | -        | -    | PA0454   | 22    | 20   |
| 514438 | 514427 | 513051 | 513044 - | dbpA | PA0455   | 80    | 63   |
| 514638 | 514775 | 514984 | 515021 + | -    | PA0456   | 13435 | 8795 |
|        | 515135 | 515659 | +        | -    | PA0457   | 36    | 26   |
| 516027 | 516027 | 515653 | -        | -    | PA0457.1 | 23    | 24   |
|        | 517462 | 516029 | -        | -    | PA0458   | 29    | 20   |
|        | 518083 | 520635 | +        | -    | PA0459   | 7     | 3    |
| 520711 | 520737 | 521315 | 521414 + | -    | PA0460   | 91    | 110  |
|        | 522517 | 521630 | 521630 - | -    | PA0461   | 115   | 116  |
|        | 522465 | 523169 | 523247 + | -    | PA0462   | 55    | 35   |
| 523250 | 523254 | 523943 | +        | creB | PA0463   | 79    | 46   |
|        | 523943 | 525367 | +        | creC | PA0464   | 30    | 28   |
|        | 525469 | 526827 | +        | creD | PA0465   | 8     | 7    |
|        | 526877 | 527179 | +        | -    | PA0466   | 8     | 4    |
| 527944 | 527944 | 527324 | -        | -    | PA0467   | 33    | 28   |
|        | 528913 | 527963 | -        | -    | PA0468   | 39    | 23   |
| 528914 | 528999 | 529856 | 529992 + | -    | PA0469   | 62    | 31   |
|        | 532437 | 530029 | -        | fluA | PA0470   | 13    | 10   |

|        |        |        |        |   |      |        |     |     |
|--------|--------|--------|--------|---|------|--------|-----|-----|
|        | 533512 | 532541 | 532438 | - | -    | PA0471 | 15  | 16  |
| 534058 | 534027 | 533509 | -      | - | -    | PA0472 | 23  | 25  |
| 534181 | 534196 | 534945 | 535017 | + | -    | PA0473 | 52  | 53  |
|        | 535085 | 535489 | +      | + | -    | PA0474 | 2   | 3   |
|        | 535539 | 536108 | +      | + | -    | PA0475 | 17  | 16  |
|        | 537869 | 536142 | -      | - | -    | PA0476 | 11  | 8   |
|        | 539143 | 538217 | -      | - | -    | PA0477 | 19  | 8   |
|        | 539231 | 539707 | +      | + | -    | PA0478 | 29  | 20  |
|        | 540735 | 539785 | 539785 | - | -    | PA0479 | 16  | 10  |
|        | 540839 | 541636 | +      | + | -    | PA0480 | 5   | 3   |
| 541637 | 541679 | 542122 | 542127 | + | -    | PA0481 | 31  | 39  |
| 544393 | 544347 | 542170 | 542170 | - | glcB | PA0482 | 218 | 149 |
|        | 544654 | 545097 | 545097 | + | -    | PA0483 | 47  | 17  |
|        | 545129 | 545644 | 545644 | + | -    | PA0484 | 14  | 9   |
| 547250 | 547230 | 546334 | 546230 | - | -    | PA0485 | 58  | 95  |
| 548406 | 548406 | 547432 | 547271 | - | -    | PA0486 | 47  | 32  |
| 549293 | 549226 | 548468 | 548407 | - | -    | PA0487 | 55  | 25  |
|        | 549614 | 549294 | -      | - | -    | PA0488 | 14  | 13  |
|        | 550381 | 549656 | -      | - | -    | PA0489 | 5   | 5   |
|        | 550813 | 550520 | -      | - | -    | PA0490 | 26  | 23  |
|        | 551793 | 550867 | -      | - | -    | PA0491 | 23  | 14  |
|        | 551911 | 552669 | +      | + | -    | PA0492 | 19  | 8   |
| 552670 | 552746 | 552994 | 553004 | + | -    | PA0493 | 29  | 17  |
|        | 553005 | 554381 | +      | + | -    | PA0494 | 15  | 12  |
| 554382 | 554383 | 555261 | +      | + | -    | PA0495 | 27  | 28  |
|        | 555251 | 556228 | +      | + | -    | PA0496 | 17  | 15  |
|        | 557276 | 556275 | -      | - | -    | PA0497 | 12  | 15  |
|        | 558361 | 557354 | -      | - | -    | PA0498 | 20  | 12  |
|        | 559078 | 558377 | -      | - | -    | PA0499 | 12  | 7   |
| 559585 | 559644 | 560702 | 560702 | + | bioB | PA0500 | 324 | 450 |
| 560790 | 560808 | 562013 | +      | + | bioF | PA0501 | 93  | 149 |
|        | 562006 | 562728 | +      | - | -    | PA0502 | 73  | 111 |

|        |        |        |          |      |          |     |     |
|--------|--------|--------|----------|------|----------|-----|-----|
|        | 562721 | 563545 | 563548 + | -    | PA0503   | 54  | 89  |
| 563549 | 563549 | 564235 | 564323 + | biOD | PA0504   | 33  | 65  |
| 564324 | 564344 | 564574 | 564574 + | -    | PA0505   | 109 | 75  |
| 564795 | 564914 | 566719 | 566742 + | -    | PA0506   | 49  | 43  |
|        | 566932 | 568728 | +        | -    | PA0507   | 7   | 3   |
|        | 569002 | 570780 | +        | -    | PA0508   | 32  | 18  |
|        | 572592 | 571111 | -        | nirN | PA0509   | 4   | 16  |
|        | 573422 | 572583 | -        | -    | PA0510   | 4   | 21  |
|        | 574596 | 573433 | -        | nirJ | PA0511   | 5   | 17  |
|        | 575105 | 574590 | -        | -    | PA0512   | 4   | 25  |
|        | 575523 | 575080 | -        | -    | PA0513   | 3   | 13  |
|        | 576040 | 575516 | -        | nirL | PA0514   | 3   | 18  |
|        | 576489 | 576037 | -        | -    | PA0515   | 7   | 20  |
|        | 577676 | 576498 | -        | nirF | PA0516   | 7   | 36  |
|        | 578032 | 577673 | -        | nirC | PA0517   | 5   | 27  |
|        | 578343 | 578029 | -        | nirM | PA0518   | 22  | 71  |
|        | 580100 | 578394 | 578394 - | nirS | PA0519   | 80  | 84  |
|        | 580316 | 581098 | +        | nirQ | PA0520   | 19  | 12  |
|        | 581133 | 581660 | +        | -    | PA0521   | 4   | 3   |
|        | 581668 | 581925 | +        | -    | PA0522   | 2   | 0   |
|        | 582015 | 582455 | +        | norC | PA0523   | 2   | 5   |
|        | 582455 | 583855 | +        | norB | PA0524   | 4   | 2   |
|        | 583857 | 585695 | +        | -    | PA0525   | 6   | 11  |
|        | 585896 | 585702 | -        | -    | PA0526   | 67  | 79  |
| 586677 | 586663 | 585980 | 585897 - | dnr  | PA0527   | 260 | 195 |
| 586867 |        |        | 586990 + | rsmy | PA0527.1 | 154 | 214 |
|        | 587895 | 587017 | -        | -    | PA0528   | 14  | 10  |
|        | 587997 | 588698 | +        | -    | PA0529   | 24  | 6   |
|        | 588924 | 590105 | +        | -    | PA0530   | 12  | 6   |
|        | 590105 | 590821 | +        | -    | PA0531   | 6   | 5   |
|        | 591402 | 590896 | -        | -    | PA0532   | 17  | 9   |
|        | 591445 | 592935 | +        | -    | PA0533   | 23  | 21  |

|        |        |        |          |      |              |     |     |
|--------|--------|--------|----------|------|--------------|-----|-----|
| 593252 | 593273 | 594562 | 594568 + | -    | PA0534       | 21  | 31  |
| 594570 | 594580 | 595134 | 595205 + | -    | PA0535       | 36  | 46  |
| 596273 | 596270 | 595245 | 595245 - | -    | PA0536       | 104 | 101 |
| 596882 | 596882 | 596274 | 596274 - | -    | PA0537       | 222 | 192 |
| 597543 | 597479 | 596970 | 596885 - | dsbB | PA0538       | 65  | 41  |
|        | 597708 | 598538 | +        | -    | PA0539       | 7   | 9   |
|        | 598608 | 598994 | +        | -    | PA0540       | 22  | 17  |
| 599091 | 599107 | 599565 | 599565 + | -    | PA0541       | 174 | 228 |
| 600232 | 600176 | 599757 | 599754 - | -    | PA0542       | 233 | 213 |
|        | 600426 | 601394 | +        | -    | PA0543       | 8   | 4   |
|        | 602141 | 601398 | -        | -    | PA0544       | 27  | 18  |
|        | 602346 | 603650 | +        | -    | PA0545       | 37  | 73  |
| 604911 | 604896 | 603706 | 603695 - | metK | PA0546       | 885 | 714 |
| 605913 | 605913 | 604912 | 604912 - | -    | PA0547       | 335 | 342 |
| 606127 | 606160 | 608157 | +        | tktA | PA0548       | 504 | 459 |
|        | 608157 | 609221 | +        | -    | PA0549       | 119 | 110 |
| 610029 | 609999 | 609202 | -        | -    | PA0550       | 50  | 43  |
| 610197 | 610214 | 611275 | 611275 + | epd  | PA0551       | 140 | 150 |
| 611276 | 611281 | 612444 | 612444 + | pgk  | PA0552       | 390 | 355 |
| 612453 | 612517 | 612717 | 612876 + | -    | PA0553       | 248 | 231 |
| 612877 | 612877 | 613218 | 613299 + | -    | PA0554       | 317 | 342 |
| 613300 |        |        | 613329 ? | -    | predicted RN | 577 | 574 |
| 613330 | 613338 | 614402 | 614402 + | fda  | PA0555       | 830 | 663 |
| 614403 | 614468 | 614950 | 614951 + | -    | PA0556       | 91  | 84  |
|        | 615608 | 614952 | -        | -    | PA0557       | 25  | 22  |
|        | 615607 | 616374 | +        | -    | PA0558       | 26  | 17  |
| 617561 | 617549 | 616371 | -        | -    | PA0559       | 48  | 52  |
| 617649 | 617662 | 618150 | 618164 + | -    | PA0560       | 55  | 40  |
| 618165 | 618176 | 619330 | 619330 + | -    | PA0561       | 39  | 35  |
| 620134 | 620006 | 619332 | 619331 - | -    | PA0562       | 58  | 54  |
| 620549 | 620488 | 620135 | 620135 - | -    | PA0563       | 787 | 657 |
|        | 621577 | 620666 | -        | -    | PA0564       | 23  | 12  |

|        |        |        |          |      |              |      |      |
|--------|--------|--------|----------|------|--------------|------|------|
| 622693 | 621695 | 622033 | +        | -    | PA0565       | 18   | 18   |
| 622726 | 622538 | 622023 | -        | -    | PA0566       | 45   | 36   |
| 623352 | 622726 | 622884 | 622893 + | -    | PA0567       | 67   | 61   |
| 623851 | 623352 | 622894 | 622894 - | -    | PA0568       | 40   | 40   |
|        | 623838 | 623368 | 623358 - | -    | PA0569       | 37   | 35   |
| 624816 | 624199 | 623852 | 623852 - | -    | PA0570       | 36   | 25   |
|        | 624803 | 624189 | -        | -    | PA0571       | 39   | 34   |
|        | 627765 | 624994 | 624994 - | -    | PA0572       | 46   | 9    |
| 629956 | 628670 | 628335 | -        | -    | PA0573       | 25   | 9    |
| 630510 | 629884 | 628763 | 628671 - | -    | PA0574       | 73   | 48   |
|        |        |        | 630434 - | -    | PA0574.1     | 23   | 41   |
| 636240 | 634264 | 630527 | -        | -    | PA0575       | 6    | 6    |
| 638380 | 636224 | 634371 | 634360 - | rpod | PA0576       | 1343 | 1348 |
| 638899 | 638298 | 636304 | 636244 - | dnag | PA0577       | 177  | 213  |
| 639155 | 638830 | 638381 | 638381 - | -    | PA0578       | 415  | 621  |
| 639156 | 639115 | 638900 | 638900 - | rpsU | PA0579       | 3468 | 5642 |
| 639301 | 639316 | 640341 | 639223 ? | -    | predicted RN | 655  | 1269 |
| 641057 | 640989 | 640420 | 640341 + | gcp  | PA0580       | 141  | 184  |
| 641065 | 641073 | 641426 | 640392 - | -    | PA0581       | 99   | 89   |
|        | 641417 | 641959 | + +      | folB | PA0582       | 74   | 97   |
|        | 643164 | 641932 | -        | -    | PA0583       | 66   | 80   |
|        | 643714 | 643208 | -        | cca  | PA0584       | 38   | 31   |
|        | 645361 | 643808 | -        | -    | PA0585       | 4    | 4    |
|        | 646629 | 645358 | -        | -    | PA0586       | 13   | 11   |
| 649306 | 648652 | 646730 | -        | -    | PA0587       | 20   | 13   |
|        | 649263 | 648931 | 646730 - | -    | PA0588       | 40   | 29   |
| 650538 | 650158 | 649307 | 648791 - | -    | PA0589       | 76   | 72   |
| 651421 | 651381 | 650158 | 649307 - | apaH | PA0590       | 96   | 86   |
|        | 652483 | 650575 | -        | -    | PA0591       | 144  | 127  |
|        | 653772 | 652480 | 650551 - | ksgA | PA0592       | 124  | 155  |
|        |        |        | 651478 - | pdxA | PA0593       | 75   | 75   |
|        |        |        | -        | sufA | PA0594       | 369  | 374  |

|        |        |        |   |      |              |     |     |
|--------|--------|--------|---|------|--------------|-----|-----|
| 656577 | 656527 | 653753 | - | ostA | PA0595       | 613 | 597 |
| 656635 | 656654 | 657670 | + | -    | PA0596       | 110 | 104 |
| 658342 | 657667 | 658341 | + | -    | PA0597       | 87  | 84  |
|        | 658343 | 659101 | + | -    | PA0598       | 58  | 64  |
|        | 660163 | 659102 | - | -    | PA0599       | 34  | 29  |
| 662709 | 660315 | 662708 | + | -    | PA0600       | 26  | 27  |
| 663510 | 662754 | 663386 | + | -    | PA0601       | 42  | 36  |
| 664770 | 663515 | 664549 | + | -    | PA0602       | 98  | 53  |
|        |        | 664782 | ? | -    | predicted RN | 575 | 2   |
| 665893 | 664783 | 665892 | + | -    | PA0603       | 677 | 8   |
|        |        | 665938 | ? | -    | predicted RN | 589 | 23  |
|        | 665948 | 666994 | + | -    | PA0604       | 600 | 15  |
|        | 667108 | 668355 | + | -    | PA0605       | 176 | 5   |
|        | 668461 | 669291 | + | -    | PA0606       | 153 | 6   |
| 669401 | 669415 | 670089 | + | rpe  | PA0607       | 182 | 211 |
|        | 670089 | 670907 | + | -    | PA0608       | 110 | 148 |
| 670945 | 670980 | 672458 | + | trpE | PA0609       | 109 | 138 |
| 673091 | 673091 | 672777 | - | prtN | PA0610       | 150 | 133 |
| 673961 | 673961 | 673191 | - | ptrR | PA0611       | 135 | 89  |
| 674096 | 674419 | 674619 | + | ptrB | PA0612       | 168 | 160 |
| 674621 | 674667 | 675026 | + | -    | PA0613       | 219 | 187 |
| 675380 | 675390 | 675839 | + | -    | PA0614       | 122 | 85  |
| 675840 | 675861 | 676376 | + | -    | PA0615       | 202 | 137 |
|        | 676373 | 676930 | + | -    | PA0616       | 165 | 94  |
| 677083 | 677083 | 677409 | + | -    | PA0617       | 270 | 185 |
|        | 677406 | 678293 | + | -    | PA0618       | 256 | 177 |
|        | 678286 | 678819 | + | -    | PA0619       | 271 | 192 |
| 678821 | 678821 | 680896 | + | -    | PA0620       | 327 | 226 |
| 681366 | 680893 | 681351 | + | -    | PA0621       | 297 | 216 |
| 682555 | 681394 | 682554 | + | -    | PA0622       | 710 | 472 |
|        | 682567 | 683070 | + | -    | PA0623       | 797 | 503 |
| 683072 |        | 683081 | ? | -    | predicted RN | 628 | 429 |

|        |        |        |        |   |      |        |     |     |
|--------|--------|--------|--------|---|------|--------|-----|-----|
| 683082 | 683085 | 683429 | 683455 | + | -    | PA0624 | 496 | 304 |
| 683471 | 683599 | 685836 | 685836 | + | -    | PA0625 | 305 | 181 |
| 685837 | 685846 | 686718 |        | + | -    | PA0626 | 188 | 133 |
|        | 686693 | 686899 | 686956 | + | -    | PA0627 | 165 | 117 |
| 686957 | 686957 | 687946 | 687978 | + | -    | PA0628 | 175 | 131 |
| 687979 | 687979 | 688608 |        | + | -    | PA0629 | 135 | 87  |
|        | 688605 | 688967 |        | + | -    | PA0630 | 138 | 98  |
|        | 688964 | 689221 | 689221 | + | -    | PA0631 | 111 | 86  |
| 689222 | 689236 | 689466 | 689466 | + | -    | PA0632 | 180 | 121 |
| 689467 | 689537 | 690031 | 690032 | + | -    | PA0633 | 680 | 374 |
| 690042 | 690043 | 690390 | 690390 | + | -    | PA0634 | 510 | 259 |
| 690391 | 690420 | 690674 | 690676 | + | -    | PA0635 | 389 | 198 |
| 690704 | 690721 | 692556 |        | + | -    | PA0636 | 219 | 136 |
|        | 692549 | 692890 | 692897 | + | -    | PA0637 | 165 | 96  |
| 692898 | 692898 | 693593 | 693593 | + | -    | PA0638 | 145 | 74  |
| 693594 | 693596 | 694366 | 694366 | + | -    | PA0639 | 126 | 74  |
| 694368 | 694421 | 695023 | 695023 | + | -    | PA0640 | 184 | 123 |
| 695024 | 695082 | 698696 | 698696 | + | -    | PA0641 | 126 | 81  |
| 698706 | 698932 | 699720 | 699743 | + | -    | PA0642 | 126 | 82  |
| 699744 | 699744 | 700835 |        | + | -    | PA0643 | 171 | 113 |
|        | 700835 | 701170 |        | + | -    | PA0644 | 219 | 124 |
|        | 701151 | 701381 | 701476 | + | -    | PA0645 | 179 | 114 |
| 701477 | 701477 | 702529 |        | + | -    | PA0646 | 246 | 132 |
|        | 702529 | 702831 |        | + | -    | PA0647 | 275 | 159 |
|        | 702828 | 703058 | 703077 | + | -    | PA0648 | 253 | 153 |
| 703230 | 703477 | 704082 | 704082 | + | trpG | PA0649 | 145 | 132 |
| 704083 | 704084 | 705133 |        | + | trpD | PA0650 | 135 | 115 |
|        | 705130 | 705966 | 705977 | + | trpC | PA0651 | 164 | 135 |
| 706786 | 706672 | 706028 | 706025 | - | vfr  | PA0652 | 838 | 277 |
| 706935 | 706944 | 707366 | 707390 | + | -    | PA0653 | 162 | 141 |
| 707452 | 707686 | 708480 | 708491 | + | spED | PA0654 | 596 | 702 |
| 709183 | 709182 | 708535 | 708528 | - | -    | PA0655 | 187 | 112 |

|        |        |        |          |      |              |      |      |
|--------|--------|--------|----------|------|--------------|------|------|
| 709620 | 709620 | 709282 | -        | -    | PA0656       | 33   | 19   |
| 709621 | 709699 | 711180 | 711219 + | -    | PA0657       | 48   | 33   |
| 712080 | 712020 | 711220 | 711220 - | -    | PA0658       | 84   | 63   |
| 713163 | 713157 | 712081 | 712081 - | -    | PA0659       | 205  | 153  |
| 714247 | 714247 | 713279 | 713171 - | -    | PA0660       | 78   | 53   |
| 714692 | 714686 | 714264 | 714248 - | -    | PA0661       | 130  | 80   |
| 714948 | 714977 | 716011 | +        | argC | PA0662       | 180  | 166  |
|        | 716011 | 716730 | +        | -    | PA0663       | 171  | 129  |
|        | 716731 | 717153 | 717165 + | -    | PA0664       | 211  | 155  |
| 717214 | 717231 | 717581 | 717591 + | -    | PA0665       | 326  | 271  |
| 718726 | 718726 | 717635 | 717635 - | -    | PA0666       | 130  | 106  |
| 720072 | 720072 | 718729 | 718727 - | -    | PA0667       | 296  | 253  |
| 720073 |        |        | 720188 ? | -    | predicted RN | 500  | 681  |
| 720242 |        |        | 720251 ? | -    | predicted RN | 258  | 386  |
| 720344 |        |        | 720354 ? | -    | predicted RN | 360  | 404  |
| 720355 | 720357 | 721556 | 722095 + | tyrZ | PA0668       | 477  | 395  |
| 722096 |        |        | 723631 + | -    | PA0668.1     | 131  | 118  |
| 723696 |        |        | 723772 + | -    | PA0668.2     | 4629 | 4940 |
| 723801 |        |        | 723876 + | -    | PA0668.3     | 3221 | 2967 |
| 724103 |        |        | 726993 + | -    | PA0668.4     | 148  | 140  |
| 727136 |        |        | 727255 + | -    | PA0668.5     | 9    | 14   |
|        | 730703 | 727608 | -        | -    | PA0669       | 7    | 8    |
|        | 732094 | 730679 | -        | -    | PA0670       | 11   | 11   |
|        | 732653 | 732102 | -        | -    | PA0671       | 8    | 8    |
| 732919 | 732959 | 733555 | 733595 + | hemo | PA0672       | 30   | 44   |
|        | 733993 | 733673 | -        | -    | PA0673       | 14   | 11   |
|        | 734159 | 734875 | +        | vreA | PA0674       | 2    | 4    |
|        | 734872 | 735417 | +        | vrel | PA0675       | 2    | 4    |
|        | 735487 | 736446 | +        | vreR | PA0676       | 4    | 8    |
|        | 737097 | 736456 | -        | -    | PA0677       | 1    | 2    |
|        | 737530 | 737081 | -        | -    | PA0678       | 0    | 0    |
|        | 737677 | 738108 | +        | -    | PA0679       | 0    | 3    |

|  |        |        |   |       |        |     |     |
|--|--------|--------|---|-------|--------|-----|-----|
|  | 738485 | 738111 | - | -     | PA0680 | 2   | 2   |
|  | 738719 | 739168 | + | -     | PA0681 | 1   | 4   |
|  | 739176 | 740141 | + | -     | PA0682 | 0   | 3   |
|  | 740203 | 741348 | + | -     | PA0683 | 1   | 0   |
|  | 741335 | 741928 | + | -     | PA0684 | 1   | 1   |
|  | 741925 | 744336 | + | -     | PA0685 | 4   | 2   |
|  | 744333 | 745742 | + | -     | PA0686 | 2   | 2   |
|  | 745742 | 746956 | + | -     | PA0687 | 3   | 5   |
|  | 747396 | 748576 | + | -     | PA0688 | 18  | 39  |
|  | 748647 | 749774 | + | -     | PA0689 | 40  | 50  |
|  | 749957 | 762499 | + | -     | PA0690 | 7   | 7   |
|  | 762891 | 763493 | + | -     | PA0691 | 1   | 1   |
|  | 763657 | 765291 | + | -     | PA0692 | 1   | 1   |
|  | 765315 | 767162 | + | exbB2 | PA0693 | 1   | 2   |
|  | 767173 | 767592 | + | exbD2 | PA0694 | 3   | 1   |
|  | 767601 | 768347 | + | -     | PA0695 | 0   | 0   |
|  | 768415 | 770121 | + | -     | PA0696 | 4   | 3   |
|  | 770156 | 770818 | + | -     | PA0697 | 1   | 5   |
|  | 770847 | 771326 | + | -     | PA0698 | 5   | 3   |
|  | 771331 | 772275 | + | -     | PA0699 | 4   | 3   |
|  | 772275 | 772700 | + | -     | PA0700 | 2   | 4   |
|  | 772710 | 773696 | + | -     | PA0701 | 4   | 5   |
|  | 775321 | 774416 | - | -     | PA0702 | 8   | 8   |
|  | 776716 | 775400 | - | -     | PA0703 | 9   | 11  |
|  | 778181 | 776787 | - | -     | PA0704 | 15  | 16  |
|  | 779358 | 778309 | - | migA  | PA0705 | 143 | 162 |
|  | 780112 | 779463 | - | cat   | PA0706 | 78  | 83  |
|  | 780973 | 780194 | - | toxR  | PA0707 | 7   | 7   |
|  | 782113 | 781259 | - | -     | PA0708 | 28  | 29  |
|  | 782229 | 782525 | + | -     | PA0709 | 14  | 17  |
|  | 782570 | 782965 | + | gloA2 | PA0710 | 11  | 9   |
|  | 783515 | 783009 | - | -     | PA0711 | 5   | 3   |

|        |        |        |   |       |          |     |     |
|--------|--------|--------|---|-------|----------|-----|-----|
|        | 783833 | 783576 | - | -     | PA0712   | 21  | 24  |
|        | 784173 | 784466 | + | -     | PA0713   | 47  | 6   |
|        | 784698 | 785174 | + | -     | PA0714   | 5   | 4   |
| 785498 |        | 785570 | + | phrD  | PA0714.1 | 37  | 37  |
| 785880 | 785969 | 786925 | + | -     | PA0715   | 166 | 194 |
| 786926 | 786928 | 788253 | + | -     | PA0716   | 106 | 143 |
|        | 789144 | 789356 | + | -     | PA0717   | 10  | 13  |
|        | 789360 | 789650 | + | -     | PA0718   | 18  | 12  |
|        | 789654 | 790031 | + | -     | PA0719   | 11  | 9   |
|        | 790166 | 790600 | + | -     | PA0720   | 46  | 31  |
| 790601 | 790617 | 790709 | + | -     | PA0721   | 32  | 29  |
| 790722 | 790722 | 790973 | + | -     | PA0722   | 87  | 74  |
| 790974 | 790986 | 791234 | + | coaB  | PA0723   | 99  | 113 |
|        | 791370 | 792632 | + | -     | PA0724   | 7   | 3   |
|        | 792637 | 792993 | + | -     | PA0725   | 7   | 3   |
|        | 792997 | 794271 | + | -     | PA0726   | 9   | 7   |
|        | 794501 | 795793 | + | -     | PA0727   | 13  | 10  |
|        | 795793 | 796776 | + | -     | PA0728   | 11  | 11  |
| 796869 | 797251 | 797598 | + | -     | PA0729   | 335 | 363 |
| 797794 |        | 797721 | - | -     | PA0729.1 | 48  | 80  |
| 798831 | 798827 | 797925 | - | -     | PA0730   | 64  | 68  |
| 800021 | 800016 | 799279 | - | -     | PA0731   | 46  | 68  |
|        | 801139 | 800096 | - | -     | PA0732   | 31  | 22  |
|        | 801967 | 801275 | - | -     | PA0733   | 21  | 17  |
| 802239 | 802239 | 801967 | - | -     | PA0734   | 37  | 35  |
|        | 803075 | 802260 | - | -     | PA0735   | 33  | 33  |
| 804231 | 804148 | 803072 | - | -     | PA0736   | 39  | 38  |
|        | 804656 | 805111 | + | -     | PA0737   | 3   | 6   |
|        | 805228 | 805473 | + | -     | PA0738   | 8   | 6   |
|        | 806702 | 805788 | - | -     | PA0739   | 15  | 12  |
|        | 806805 | 808781 | + | sdsA1 | PA0740   | 5   | 3   |
| 809457 | 809457 | 808816 | - | -     | PA0741   | 14  | 6   |

|        |        |        |          |      |        |     |     |
|--------|--------|--------|----------|------|--------|-----|-----|
|        | 809882 | 809574 | -        | -    | PA0742 | 21  | 2   |
|        | 811171 | 810275 | -        | -    | PA0743 | 14  | 22  |
| 812386 | 812386 | 811283 | 811241 - | -    | PA0744 | 16  | 58  |
| 813314 | 813263 | 812445 | 812443 - | -    | PA0745 | 29  | 90  |
| 814492 | 814492 | 813329 | 813316 - | -    | PA0746 | 15  | 47  |
| 816036 | 816012 | 814504 | 814493 - | -    | PA0747 | 26  | 36  |
| 816901 | 817082 | 817903 | 817946 + | -    | PA0749 | 26  | 39  |
| 817960 | 818003 | 818698 | 818716 + | ung  | PA0750 | 155 | 182 |
|        | 819862 | 818825 | -        | -    | PA0751 | 31  | 36  |
|        | 821372 | 819855 | -        | -    | PA0752 | 14  | 17  |
|        | 821853 | 821383 | -        | -    | PA0753 | 7   | 12  |
|        | 822885 | 821902 | -        | -    | PA0754 | 23  | 24  |
|        | 824198 | 822915 | -        | opdH | PA0755 | 17  | 12  |
| 824396 | 824409 | 825080 | +        | -    | PA0756 | 37  | 36  |
|        | 825073 | 826455 | 826455 + | -    | PA0757 | 34  | 31  |
| 827337 | 827299 | 826463 | 826456 - | -    | PA0758 | 172 | 113 |
| 828348 | 828344 | 827400 | 827338 - | -    | PA0759 | 92  | 89  |
| 828612 | 828617 | 828871 | 828873 + | -    | PA0760 | 211 | 305 |
| 830897 | 830892 | 829276 | 829090 - | nadB | PA0761 | 122 | 136 |
| 830973 | 831301 | 831882 | 831913 + | algU | PA0762 | 470 | 602 |
| 831914 | 831914 | 832498 | 832506 + | mucA | PA0763 | 361 | 475 |
| 832507 | 832507 | 833457 | +        | mucB | PA0764 | 179 | 252 |
|        | 833454 | 833909 | 833909 + | mucC | PA0765 | 173 | 286 |
| 833910 | 833949 | 835373 | 835383 + | mucD | PA0766 | 458 | 754 |
| 835493 | 835523 | 837322 | 837327 + | lepA | PA0767 | 347 | 425 |
| 837328 | 837328 | 838182 | 838239 + | lepB | PA0768 | 203 | 245 |
| 838257 | 838351 | 838728 | +        | -    | PA0769 | 230 | 254 |
|        | 838725 | 839414 | +        | rnc  | PA0770 | 221 | 227 |
|        | 839407 | 840324 | 840324 + | era  | PA0771 | 269 | 284 |
| 840325 | 840385 | 841086 | +        | recO | PA0772 | 49  | 53  |
|        | 841079 | 841825 | 841873 + | pdxI | PA0773 | 110 | 142 |
|        | 842881 | 841913 | 841892 - | -    | PA0774 | 105 | 147 |

|        |        |        |          |       |        |     |     |
|--------|--------|--------|----------|-------|--------|-----|-----|
| 843633 | 843618 | 842878 | -        | -     | PA0775 | 140 | 233 |
|        | 844295 | 843723 | -        | -     | PA0776 | 3   | 3   |
|        | 845179 | 844427 | -        | -     | PA0777 | 21  | 22  |
| 845728 | 845682 | 845278 | 845214 - | icp   | PA0778 | 111 | 124 |
| 848193 | 848192 | 845793 | 845793 - | -     | PA0779 | 232 | 282 |
| 848356 | 848383 | 849135 | 849255 + | pruR  | PA0780 | 30  | 31  |
|        | 851319 | 849256 | -        | -     | PA0781 | 5   | 4   |
| 851629 | 851783 | 854965 | 855101 + | putA  | PA0782 | 517 | 53  |
| 855103 | 855277 | 856797 | 856802 + | putP  | PA0783 | 365 | 210 |
| 857943 | 857871 | 856942 | 856863 - | -     | PA0784 | 68  | 44  |
|        | 857998 | 858636 | +        | azoR1 | PA0785 | 10  | 10  |
|        | 858646 | 858951 | +        | -     | PA0786 | 9   | 6   |
|        | 859007 | 860170 | +        | -     | PA0787 | 24  | 28  |
|        | 863300 | 860175 | -        | -     | PA0788 | 8   | 7   |
| 863891 | 864095 | 865510 | 865525 + | -     | PA0789 | 522 | 677 |
|        | 866451 | 865636 | -        | -     | PA0790 | 28  | 33  |
|        | 866558 | 867346 | +        | -     | PA0791 | 29  | 39  |
| 868808 | 868808 | 867324 | -        | prpD  | PA0792 | 16  | 29  |
| 870248 | 870130 | 868943 | 868809 - | -     | PA0793 | 26  | 55  |
| 872985 | 872855 | 870249 | 870249 - | -     | PA0794 | 46  | 86  |
| 874137 | 874113 | 872986 | 872986 - | prpC  | PA0795 | 160 | 317 |
| 875102 | 875102 | 874206 | 874139 - | prpB  | PA0796 | 103 | 161 |
| 875857 | 875835 | 875113 | 875110 - | -     | PA0797 | 31  | 52  |
|        | 875953 | 876603 | +        | pmtA  | PA0798 | 10  | 11  |
| 878963 | 878608 | 876617 | 876604 - | -     | PA0799 | 59  | 46  |
| 879027 | 879027 | 879560 | +        | -     | PA0800 | 14  | 33  |
|        | 879557 | 881077 | +        | -     | PA0801 | 31  | 41  |
|        | 881077 | 881400 | 881485 + | -     | PA0802 | 38  | 52  |
|        | 881486 | 881926 | +        | -     | PA0803 | 14  | 19  |
|        | 881958 | 882779 | +        | -     | PA0804 | 25  | 23  |
| 883581 | 883216 | 882989 | 882974 - | -     | PA0805 | 721 | 495 |
|        | 883777 | 884172 | +        | -     | PA0806 | 7   | 6   |

|        |        |        |          |        |          |        |        |
|--------|--------|--------|----------|--------|----------|--------|--------|
| 884338 | 884799 | 885566 | 885634 + | ampDh3 | PA0807   | 52     | 36     |
|        | 885635 | 886108 | +        | -      | PA0808   | 17     | 19     |
|        | 887476 | 886160 | -        | -      | PA0809   | 15     | 10     |
|        | 888284 | 887583 | -        | -      | PA0810   | 14     | 12     |
|        | 889562 | 888315 | -        | -      | PA0811   | 13     | 9      |
|        | 890854 | 889559 | -        | -      | PA0812   | 12     | 7      |
|        | 892389 | 891142 | -        | -      | PA0813   | 12     | 11     |
|        | 892820 | 892386 | -        | -      | PA0814   | 6      | 2      |
| 892864 | 893041 | 893994 | +        | -      | PA0815   | 45     | 22     |
|        | 894851 | 893967 | -        | -      | PA0816   | 27     | 30     |
|        | 894952 | 895377 | +        | -      | PA0817   | 19     | 13     |
|        | 895668 | 895396 | -        | -      | PA0818   | 20     | 10     |
|        | 895824 | 896117 | +        | -      | PA0819   | 12     | 8      |
| 896401 | 896416 | 897228 | 897250 + | -      | PA0820   | 122    | 100    |
| 898439 | 898423 | 897335 | 897251 - | -      | PA0821   | 47     | 54     |
| 898886 | 898886 | 898440 | 898440 - | -      | PA0822   | 58     | 63     |
|        | 899141 | 898908 | 898887 - | -      | PA0823   | 50     | 63     |
|        | 899656 | 899138 | -        | -      | PA0824   | 16     | 17     |
|        | 900165 | 899830 | -        | -      | PA0825   | 9      | 6      |
|        | 901046 | 900408 | -        | -      | PA0826   | 23     | 22     |
| 901872 |        |        | 901520 - | srfA   | PA0826.2 | 131612 | 173918 |
| 901881 | 901779 | 901746 | -        | -      | PA0826.1 | 151826 | 200084 |
|        | 902812 | 901934 | -        | -      | PA0827   | 22     | 15     |
|        | 902900 | 903583 | +        | -      | PA0828   | 4      | 5      |
|        | 903692 | 904633 | +        | -      | PA0829   | 5      | 4      |
|        | 905601 | 904768 | -        | -      | PA0830   | 25     | 21     |
| 905701 | 905726 | 906745 | 906835 + | orxR   | PA0831   | 70     | 66     |
| 906836 | 906847 | 907488 | 907555 + | -      | PA0832   | 82     | 75     |
| 907561 | 907594 | 908307 | 908307 + | -      | PA0833   | 367    | 575    |
| 909296 | 909291 | 908377 | 908363 - | -      | PA0834   | 78     | 121    |
| 911532 | 911532 | 909418 | 909418 - | pta    | PA0835   | 52     | 95     |
| 912790 | 912779 | 911595 | 911533 - | ackA   | PA0836   | 111    | 115    |

|        |        |        |          |          |        |          |      |     |
|--------|--------|--------|----------|----------|--------|----------|------|-----|
| 912791 |        |        |          | 912861 + | -      | PA0836.1 | 375  | 279 |
| 913071 | 913086 | 913571 | 913623 + | slyD     | PA0837 | 581      | 618  |     |
| 913624 | 913777 | 914259 | 914262 + | -        | PA0838 | 152      | 181  |     |
|        | 914412 | 915002 | +        | -        | PA0839 | 16       | 11   |     |
|        | 915043 | 916155 | +        | -        | PA0840 | 30       | 18   |     |
| 916307 | 916346 | 917305 | 917308 + | -        | PA0841 | 24       | 39   |     |
|        | 918529 | 917309 | -        | -        | PA0842 | 7        | 13   |     |
|        | 919240 | 918617 | -        | plcR     | PA0843 | 2        | 3    |     |
|        | 921450 | 919258 | -        | plcH     | PA0844 | 1        | 1    |     |
|        | 923804 | 921792 | -        | -        | PA0845 | 2        | 3    |     |
| 924938 | 924922 | 924182 | 924020 - | -        | PA0846 | 67       | 88   |     |
|        | 927214 | 925007 | -        | -        | PA0847 | 10       | 9    |     |
|        | 927147 | 927746 | 927859 + | -        | PA0848 | 21       | 39   |     |
| 927862 | 927880 | 928830 | 928865 + | trxB2    | PA0849 | 31       | 58   |     |
|        | 929084 | 929503 | 929503 + | -        | PA0850 | 14       | 21   |     |
|        | 930476 | 929514 | -        | -        | PA0851 | 23       | 29   |     |
| 931844 | 931822 | 930653 | 930651 - | cbpD     | PA0852 | 92       | 66   |     |
|        | 932725 | 932102 | 932090 - | -        | PA0853 | 42       | 43   |     |
| 934115 | 934112 | 932718 | -        | fumC2    | PA0854 | 48       | 51   |     |
| 935274 | 935260 | 934241 | 934116 - | -        | PA0855 | 54       | 52   |     |
| 935427 | 935427 | 935975 | 935975 + | -        | PA0856 | 496      | 576  |     |
| 935976 | 935989 | 936294 | 936349 + | bolA     | PA0857 | 311      | 409  |     |
| 936369 | 936459 | 937397 | 937397 + | -        | PA0858 | 248      | 323  |     |
| 937433 | 937437 | 938039 | +        | -        | PA0859 | 82       | 117  |     |
|        | 938032 | 939822 | 939822 + | -        | PA0860 | 41       | 53   |     |
|        | 940117 | 942573 | +        | -        | PA0861 | 31       | 24   |     |
| 942587 | 942648 | 943430 | 943440 + | -        | PA0862 | 85       | 62   |     |
|        | 944441 | 943482 | -        | -        | PA0863 | 9        | 10   |     |
|        | 945512 | 944724 | -        | -        | PA0864 | 8        | 6    |     |
| 945788 | 945834 | 946907 | 946907 + | hpd      | PA0865 | 397      | 2082 |     |
| 946908 | 947205 | 948623 | 948775 + | arop2    | PA0866 | 34       | 228  |     |
| 948776 | 948776 | 949159 | 949159 + | mlic     | PA0867 | 307      | 361  |     |

|        |        |        |        |   |      |              |     |      |
|--------|--------|--------|--------|---|------|--------------|-----|------|
| 949160 | 949280 | 949693 | 949715 | + | -    | PA0868       | 51  | 77   |
| 950700 | 950648 | 949716 | 949716 | - | pbpG | PA0869       | 87  | 139  |
|        | 952161 | 950962 | 950948 | - | phhC | PA0870       | 333 | 1775 |
| 952519 | 952514 | 952158 | -      | - | phhB | PA0871       | 604 | 2701 |
| 952520 |        |        | 952600 | ? | -    | predicted RN | 294 | 1113 |
| 953428 | 953407 | 952619 | 952603 | - | phhA | PA0872       | 546 | 1747 |
| 953429 |        |        | 953438 | ? | -    | predicted RN | 215 | 622  |
| 953638 | 953691 | 955250 | 955252 | + | phhR | PA0873       | 52  | 37   |
| 955865 | 955722 | 955456 | 955450 | - | -    | PA0874       | 35  | 96   |
|        | 958186 | 955991 | -      | - | -    | PA0875       | 7   | 9    |
| 958187 | 958406 | 959350 | 959350 | + | -    | PA0876       | 57  | 85   |
| 960452 | 960380 | 959484 | 959351 | - | -    | PA0877       | 29  | 33   |
|        | 960497 | 961324 | +      | + | -    | PA0878       | 3   | 1    |
|        | 961370 | 962530 | +      | + | -    | PA0879       | 3   | 4    |
|        | 962545 | 962925 | +      | + | -    | PA0880       | 1   | 3    |
|        | 962964 | 964316 | +      | + | -    | PA0881       | 1   | 2    |
|        | 964372 | 965574 | +      | + | -    | PA0882       | 2   | 3    |
|        | 965585 | 966412 | +      | + | -    | PA0883       | 1   | 2    |
|        | 966526 | 967521 | +      | + | -    | PA0884       | 5   | 5    |
|        | 967570 | 968208 | +      | + | -    | PA0885       | 3   | 3    |
|        | 968205 | 969488 | +      | + | -    | PA0886       | 3   | 3    |
| 969646 | 969670 | 971625 | 971650 | + | acsA | PA0887       | 450 | 46   |
| 971858 |        |        | 971972 | + | -    | PA0887.1     | 61  | 48   |
| 971973 | 972166 | 972945 | 972946 | + | aotJ | PA0888       | 547 | 518  |
| 972954 | 973064 | 973753 | 973753 | + | aotQ | PA0889       | 158 | 144  |
| 973761 | 973770 | 974468 | 974481 | + | aotM | PA0890       | 172 | 151  |
| 974482 | 974482 | 975594 | 975594 | + | -    | PA0891       | 130 | 105  |
| 975595 | 975613 | 976377 | 976409 | + | aotP | PA0892       | 249 | 186  |
| 976410 | 976410 | 977399 | 977419 | + | argR | PA0893       | 128 | 103  |
|        | 977743 | 977420 | -      | - | -    | PA0894       | 35  | 24   |
| 977907 | 977910 | 979130 | 979131 | + | aruC | PA0895       | 398 | 441  |
| 979132 |        |        | 979144 | ? | -    | predicted RN | 226 | 359  |

|         |         |         |               |        |              |     |      |
|---------|---------|---------|---------------|--------|--------------|-----|------|
| 979145  | 979329  | 980345  | 980347 +      | aruF   | PA0896       | 152 | 201  |
| 980357  | 980357  | 981379  | 981379 +      | aruG   | PA0897       | 109 | 137  |
| 981380  | 981422  | 982888  | +<br>aruD     | PA0898 | 126          | 154 |      |
|         | 982885  | 984231  | 984231 +      | aruB   | PA0899       | 161 | 215  |
| 984235  | 984245  | 984535  | 984535 +      | -      | PA0900       | 334 | 363  |
| 984536  | 984549  | 985547  | 985547 +      | aruE   | PA0901       | 137 | 189  |
| 985618  | 985692  | 986696  | 986794 +      | -      | PA0902       | 70  | 51   |
| 986804  | 986818  | 989442  | 989529 +      | alas   | PA0903       | 343 | 418  |
| 989539  |         |         | 989580 ?      | -      | predicted RN | 396 | 500  |
| 989590  | 989590  | 990828  | 990992 +      | lysc   | PA0904       | 352 | 424  |
| 990993  |         |         | 991005 ?      | -      | predicted RN | 547 | 580  |
| 991006  | 991013  | 991198  | 991259 +      | rsmA   | PA0905       | 721 | 808  |
| 991260  |         |         | 991350 +      | -      | PA0905.1     | 573 | 1959 |
| 991468  |         |         | 991544 +      | -      | PA0905.2     | 844 | 2856 |
| 991656  |         |         | 991732 +      | -      | PA0905.3     | 258 | 834  |
| 992713  | 992543  | 991830  | 991733 -      | -      | PA0906       | 53  | 47   |
| 992714  | 992714  | 993244  | 993310 +      | -      | PA0907       | 54  | 39   |
| 993374  | 993409  | 993783  | +<br>994089 + | -      | PA0908       | 38  | 45   |
|         | 993776  | 994051  | 994673 +      | -      | PA0909       | 53  | 51   |
| 994133  | 994143  | 994646  | 995171 +      | -      | PA0910       | 99  | 107  |
| 994690  | 994699  | 995151  | 995172 -      | -      | PA0911       | 81  | 78   |
|         | 995711  | 995172  | 997486 +      | mgte   | PA0912       | 26  | 22   |
| 995852  | 996038  | 997486  | 997487 -      | -      | PA0913       | 122 | 108  |
|         | 997928  | 997536  | -<br>998444 - | -      | PA0914       | 47  | 48   |
| 998397  | 998382  | 997921  | -             | -      | PA0915       | 49  | 67   |
| 999795  | 999766  | 998444  | -             | -      | PA0916       | 162 | 193  |
| 999992  | 1000013 | 1001917 | 1001938 +     | kup    | PA0917       | 54  | 83   |
|         | 1002520 | 1001972 | 1002565 -     | -      | PA0918       | 32  | 36   |
| 1003965 | 1003964 | 1002681 | 1003966 -     | -      | PA0919       | 41  | 59   |
| 1006614 | 1006611 | 1003966 | 1007219 +     | -      | PA0920       | 28  | 43   |
| 1006848 | 1006860 | 1007219 | 1007220 -     | -      | PA0921       | 169 | 208  |
| 1007578 | 1007548 | 1007234 | -             | -      | PA0922       | 148 | 150  |

|         |         |         |         |   |       |          |     |     |
|---------|---------|---------|---------|---|-------|----------|-----|-----|
| 1007803 |         |         | 1007727 | - | -     | PA0922.1 | 4   | 13  |
| 1007839 | 1007950 | 1008999 | 1009005 | + | dinB  | PA0923   | 50  | 65  |
|         | 1010934 | 1009006 | -       | - | -     | PA0924   | 11  | 16  |
| 1011454 | 1011454 | 1011047 | 1010935 | - | -     | PA0925   | 70  | 86  |
| 1011947 | 1011947 | 1011522 | 1011455 | - | -     | PA0926   | 76  | 81  |
| 1012972 | 1012972 | 1011983 | 1011948 | - | ldhA  | PA0927   | 29  | 37  |
| 1015879 | 1015752 | 1012975 | 1012974 | - | gacS  | PA0928   | 39  | 45  |
| 1015938 | 1015938 | 1016657 |         | + | -     | PA0929   | 43  | 51  |
|         | 1016657 | 1017994 | 1018229 | + | -     | PA0930   | 24  | 29  |
|         | 1018230 | 1020458 |         | + | pirA  | PA0931   | 9   | 11  |
| 1020693 | 1020708 | 1021607 | 1021607 | + | cysM  | PA0932   | 224 | 329 |
| 1021608 | 1021616 | 1022968 | 1022968 | + | ygcA  | PA0933   | 157 | 214 |
| 1022971 | 1023053 | 1025296 | 1025296 | + | relA  | PA0934   | 216 | 284 |
| 1025363 | 1025401 | 1026231 | 1026273 | + | -     | PA0935   | 89  | 125 |
| 1027329 | 1027212 | 1026274 | 1026274 | - | lpxO2 | PA0936   | 145 | 216 |
| 1027375 | 1027445 | 1027984 | 1028113 | + | -     | PA0937   | 245 | 358 |
| 1028116 | 1028172 | 1029500 | 1029565 | + | -     | PA0938   | 379 | 734 |
|         | 1030151 | 1029825 | -       | - | -     | PA0939   | 18  | 30  |
|         | 1030411 | 1030157 | -       | - | -     | PA0940   | 25  | 16  |
|         | 1030656 | 1030423 | -       | - | -     | PA0941   | 42  | 17  |
| 1030769 | 1030772 | 1031332 | 1031385 | + | -     | PA0942   | 52  | 44  |
|         | 1032102 | 1031386 | 1031386 | - | -     | PA0943   | 445 | 573 |
|         | 1032763 | 1032095 | -       | - | purN  | PA0944   | 275 | 393 |
| 1033883 | 1033824 | 1032763 | -       | - | purM  | PA0945   | 346 | 535 |
| 1033990 | 1034038 | 1035075 | 1035086 | + | -     | PA0946   | 117 | 108 |
| 1035265 | 1035277 | 1035981 | 1035981 | + | -     | PA0947   | 265 | 470 |
| 1036577 | 1036577 | 1036158 | 1035982 | - | -     | PA0948   | 105 | 167 |
|         | 1037175 | 1036579 | 1036578 | - | wrbA  | PA0949   | 174 | 251 |
| 1037525 | 1037525 | 1037172 | -       | - | -     | PA0950   | 207 | 349 |
| 1037578 | 1037650 | 1038885 | 1039009 | + | -     | PA0951   | 48  | 59  |
| 1039623 | 1039623 | 1039240 | 1039014 | - | -     | PA0952   | 199 | 153 |
| 1039941 | 1039968 | 1040432 | +       | - | -     | PA0953   | 71  | 70  |

|         |         |         |   |      |          |      |      |
|---------|---------|---------|---|------|----------|------|------|
| 1040432 | 1040707 | 1040723 | + | -    | PA0954   | 71   | 82   |
| 1041680 | 1041680 | 1040724 | - | -    | PA0955   | 202  | 283  |
| 1043410 | 1043404 | 1041689 | - | pros | PA0956   | 423  | 569  |
| 1043418 | 1043512 | 1043919 | + | -    | PA0957   | 44   | 43   |
| 1045381 | 1045314 | 1043983 | - | oprD | PA0958   | 1558 | 1259 |
| 1045816 | 1045832 | 1046461 | + | -    | PA0959   | 84   | 138  |
|         | 1046462 | 1046671 | + | -    | PA0960   | 88   | 133  |
| 1047431 | 1046911 | 1046720 | - | -    | PA0961   | 120  | 185  |
| 1048054 | 1048019 | 1047549 | - | -    | PA0962   | 496  | 558  |
| 1048288 | 1048459 | 1050234 | + | asps | PA0963   | 649  | 924  |
| 1050301 | 1050301 | 1051047 | + | pmpR | PA0964   | 1046 | 1329 |
| 1051059 | 1051132 | 1051656 | + | ruvC | PA0965   | 224  | 319  |
| 1051673 | 1051673 | 1052278 | + | ruvA | PA0966   | 263  | 339  |
| 1052289 | 1052289 | 1053347 | + | ruvB | PA0967   | 155  | 213  |
| 1053400 | 1053400 | 1053846 | + | -    | PA0968   | 308  | 629  |
| 1053848 | 1053848 | 1054543 | + | tolQ | PA0969   | 557  | 739  |
| 1054566 | 1054566 | 1055006 | + | tolR | PA0970   | 534  | 673  |
| 1055009 | 1055009 | 1056052 | + | tolA | PA0971   | 332  | 504  |
|         | 1056049 | 1057347 | + | tolB | PA0972   | 622  | 825  |
| 1057348 | 1057400 | 1057906 | + | oprL | PA0973   | 4762 | 5768 |
| 1057916 | 1057916 | 1058740 | + | -    | PA0974   | 789  | 1200 |
| 1058785 | 1058812 | 1059606 | + | -    | PA0975   | 69   | 145  |
| 1059621 | 1059622 | 1060296 | + | -    | PA0976   | 105  | 133  |
| 1060356 |         | 1060431 | + | -    | PA0976.1 | 316  | 837  |
| 1061008 | 1060833 | 1060510 | - | -    | PA0977   | 64   | 148  |
|         | 1062034 | 1061207 | - | -    | PA0978   | 14   | 13   |
|         | 1062369 | 1062061 | - | -    | PA0979   | 18   | 20   |
|         | 1062601 | 1062885 | + | -    | PA0980   | 13   | 10   |
|         | 1062921 | 1063544 | + | -    | PA0981   | 29   | 21   |
|         | 1065103 | 1064555 | - | -    | PA0982   | 32   | 18   |
| 1065104 | 1065138 | 1065425 | + | -    | PA0983   | 29   | 31   |
| 1065943 | 1065970 | 1066296 | + | -    | PA0984   | 44   | 61   |

|         |         |         |         |   |       |              |     |     |
|---------|---------|---------|---------|---|-------|--------------|-----|-----|
| 1067823 | 1067817 | 1066321 | 1066321 | - | pyo55 | PA0985       | 45  | 29  |
|         | 1068193 | 1068456 | +       | + | -     | PA0986       | 5   | 4   |
|         | 1068489 | 1069331 | +       | + | -     | PA0987       | 4   | 6   |
| 1069765 | 1069769 | 1070173 | 1070173 | + | -     | PA0988       | 73  | 59  |
| 1071238 | 1070854 | 1070294 | 1070174 | - | -     | PA0989       | 26  | 30  |
|         | 1071877 | 1071239 | -       | - | -     | PA0990       | 10  | 10  |
|         | 1072462 | 1072839 | +       | + | -     | PA0991       | 29  | 30  |
| 1072840 | 1073285 | 1073902 | 1073919 | + | cupC1 | PA0992       | 51  | 48  |
|         | 1073960 | 1074673 | +       | + | cupC2 | PA0993       | 3   | 1   |
|         | 1074784 | 1077303 | +       | + | cupC3 | PA0994       | 10  | 10  |
| 1077916 | 1077904 | 1077383 | 1077304 | - | ogt   | PA0995       | 50  | 24  |
|         | 1078462 | 1080015 | +       | + | pqsA  | PA0996       | 39  | 2   |
|         | 1080009 | 1080860 | +       | + | pqsB  | PA0997       | 44  | 2   |
|         | 1080853 | 1081899 | +       | + | pqsC  | PA0998       | 31  | 3   |
|         | 1081942 | 1082955 | +       | + | pqsD  | PA0999       | 46  | 10  |
|         | 1082949 | 1083854 | 1083854 | + | pqsE  | PA1000       | 33  | 17  |
|         | 1083972 | 1085564 | +       | + | phnA  | PA1001       | 32  | 16  |
|         | 1085542 | 1086144 | +       | + | phnB  | PA1002       | 84  | 74  |
| 1087552 | 1087095 | 1086097 | -       | - | mvfR  | PA1003       | 145 | 148 |
| 1087716 | 1087843 | 1088901 | 1088901 | + | nadA  | PA1004       | 192 | 284 |
| 1090555 | 1090443 | 1089010 | 1088902 | - | -     | PA1005       | 95  | 92  |
| 1090603 | 1090606 | 1090857 | 1090857 | + | -     | PA1006       | 98  | 160 |
| 1090858 | 1090891 | 1091964 | 1092024 | + | -     | PA1007       | 59  | 110 |
| 1092509 | 1092498 | 1092025 | 1092025 | - | bcp   | PA1008       | 394 | 468 |
| 1093092 | 1093067 | 1092510 | 1092510 | - | -     | PA1009       | 272 | 371 |
| 1093237 | 1093251 | 1094129 | 1094146 | + | dapA  | PA1010       | 607 | 808 |
| 1094147 | 1094147 | 1095337 | +       | + | -     | PA1011       | 509 | 685 |
|         | 1095276 | 1096034 | 1096045 | + | -     | PA1012       | 210 | 303 |
| 1096046 |         |         | 1096061 | ? | -     | predicted RN | 399 | 557 |
| 1096062 | 1096063 | 1096773 | 1096866 | + | purC  | PA1013       | 615 | 709 |
| 1096867 |         |         | 1096956 | + | -     | PA1013.1     | 178 | 319 |
| 1097296 | 1097296 | 1098288 | 1098315 | + | -     | PA1014       | 151 | 225 |

|         |         |         |         |   |      |          |     |     |
|---------|---------|---------|---------|---|------|----------|-----|-----|
| 1099668 | 1099128 | 1098328 | 1098316 | - | -    | PA1015   | 75  | 79  |
|         | 1099669 | 1100820 | +       | + | -    | PA1016   | 21  | 22  |
|         | 1100930 | 1103077 | +       | + | pauA | PA1017   | 6   | 8   |
|         | 1103061 | 1103927 | +       | + | -    | PA1018   | 7   | 7   |
|         | 1104009 | 1105364 | +       | + | muck | PA1019   | 4   | 4   |
|         | 1105888 | 1107000 | +       | + | -    | PA1020   | 12  | 13  |
|         | 1107000 | 1107761 | +       | + | -    | PA1021   | 10  | 11  |
|         | 1107763 | 1108908 | +       | + | -    | PA1022   | 10  | 12  |
|         | 1108949 | 1109866 | +       | + | -    | PA1023   | 16  | 16  |
|         | 1109882 | 1110868 | +       | + | -    | PA1024   | 12  | 12  |
|         | 1110947 | 1112197 | +       | + | -    | PA1025   | 3   | 8   |
| 1113064 | 1113050 | 1112574 | 1112235 | - | -    | PA1026   | 38  | 53  |
|         | 1113129 | 1114718 | +       | + | -    | PA1027   | 12  | 9   |
|         | 1114774 | 1116060 | +       | + | -    | PA1028   | 8   | 8   |
| 1116127 | 1116213 | 1116500 | 1116631 | + | -    | PA1029   | 105 | 89  |
| 1116632 | 1116635 | 1117390 | 1117531 | + | -    | PA1030   | 60  | 69  |
| 1117532 |         |         | 1117609 | + | -    | PA1030.1 | 15  | 32  |
| 1117999 | 1118158 | 1119519 | 1119673 | + | -    | PA1031   | 110 | 156 |
| 1122224 | 1122217 | 1119674 | 1119674 | - | quip | PA1032   | 72  | 101 |
| 1123002 | 1122981 | 1122340 | 1122318 | - | -    | PA1033   | 51  | 43  |
| 1123348 | 1123348 | 1123148 | 1123148 | - | -    | PA1034   | 288 | 416 |
| 1123851 | 1123850 | 1123356 | 1123350 | - | -    | PA1035   | 160 | 123 |
| 1124031 | 1124165 | 1124725 | 1124725 | + | -    | PA1036   | 57  | 31  |
| 1125518 | 1125465 | 1124845 | 1124726 | - | -    | PA1037   | 38  | 52  |
|         | 1125865 | 1125548 | 1125520 | - | -    | PA1038   | 36  | 40  |
| 1126338 | 1126338 | 1125865 | -       | - | -    | PA1039   | 40  | 47  |
| 1126848 | 1126838 | 1126341 | 1126339 | - | -    | PA1040   | 60  | 57  |
|         | 1126969 | 1127601 | +       | + | -    | PA1041   | 15  | 12  |
| 1127708 | 1127717 | 1128016 | +       | + | -    | PA1042   | 76  | 92  |
|         | 1128009 | 1128818 | 1128856 | + | -    | PA1043   | 53  | 65  |
| 1129357 | 1129321 | 1128857 | 1128857 | - | -    | PA1044   | 44  | 49  |
| 1129451 | 1129451 | 1131595 | 1131673 | + | -    | PA1045   | 67  | 82  |

|         |         |         |         |   |      |        |      |      |
|---------|---------|---------|---------|---|------|--------|------|------|
| 1131674 | 1131674 | 1133947 | 1134005 | + | -    | PA1046 | 27   | 35   |
| 1134008 | 1134024 | 1135202 | 1135306 | + | -    | PA1047 | 66   | 72   |
| 1135318 | 1135408 | 1136289 | 1136351 | + | -    | PA1048 | 256  | 252  |
| 1136384 | 1136388 | 1137035 | 1137042 | + | pdxH | PA1049 | 150  | 213  |
| 1137043 | 1137043 | 1138155 | 1138241 | + | -    | PA1050 | 42   | 84   |
|         | 1138314 | 1139672 | 1139672 | + | -    | PA1051 | 88   | 16   |
|         | 1139714 | 1140859 |         | + | -    | PA1052 | 54   | 28   |
| 1141265 | 1141268 | 1141732 | 1141732 | + | -    | PA1053 | 1278 | 1386 |
| 1141733 | 1142061 | 1144862 |         | + | -    | PA1054 | 41   | 52   |
|         | 1144862 | 1145200 |         | + | -    | PA1055 | 53   | 53   |
|         | 1145197 | 1146696 |         | + | -    | PA1056 | 41   | 47   |
|         | 1146693 | 1147217 |         | + | -    | PA1057 | 72   | 90   |
|         | 1147202 | 1147471 |         | + | -    | PA1058 | 44   | 60   |
|         | 1147468 | 1147815 | 1147823 | + | -    | PA1059 | 55   | 59   |
| 1147824 | 1147928 | 1148833 | 1148837 | + | -    | PA1060 | 25   | 37   |
| 1148838 | 1148844 | 1149941 | 1149941 | + | -    | PA1061 | 26   | 50   |
| 1149947 | 1149952 | 1150473 |         | + | -    | PA1062 | 40   | 77   |
|         | 1150470 | 1150721 | 1150749 | + | -    | PA1063 | 81   | 103  |
| 1151422 | 1151415 | 1150750 | 1150750 | - | -    | PA1064 | 168  | 159  |
|         | 1151435 | 1151908 |         | + | -    | PA1065 | 11   | 15   |
|         | 1152575 | 1151919 | 1151919 | - | -    | PA1066 | 11   | 15   |
|         | 1152624 | 1153538 |         | + | -    | PA1067 | 14   | 8    |
| 1153590 | 1153637 | 1155547 | 1155547 | + | -    | PA1068 | 94   | 90   |
| 1155578 | 1155584 | 1157878 | 1157882 | + | -    | PA1069 | 110  | 107  |
| 1158655 | 1158655 | 1157954 | 1157930 | - | brag | PA1070 | 83   | 159  |
|         | 1159425 | 1158658 | 1158656 | - | braF | PA1071 | 89   | 185  |
|         | 1160675 | 1159422 |         | - | braE | PA1072 | 90   | 186  |
| 1161843 | 1161595 | 1160672 |         | - | brad | PA1073 | 104  | 217  |
| 1163065 | 1162977 | 1161856 | 1161847 | - | brac | PA1074 | 596  | 1060 |
| 1163276 | 1163276 | 1163593 | 1163648 | + | -    | PA1075 | 105  | 135  |
| 1163657 | 1163660 | 1164022 | 1164042 | + | -    | PA1076 | 284  | 300  |
| 1164256 | 1164275 | 1164682 | 1164682 | + | flgB | PA1077 | 164  | 203  |

|         |         |         |           |      |        |      |      |
|---------|---------|---------|-----------|------|--------|------|------|
| 1164684 | 1164688 | 1165128 | 1165128 + | flgC | PA1078 | 147  | 194  |
| 1165129 | 1165141 | 1165854 | 1165856 + | flgD | PA1079 | 196  | 198  |
| 1165881 | 1165882 | 1167270 | 1167270 + | flgE | PA1080 | 275  | 258  |
| 1167466 | 1167488 | 1168237 | 1168240 + | flgF | PA1081 | 85   | 120  |
| 1168256 | 1168284 | 1169069 | 1169099 + | flgG | PA1082 | 194  | 187  |
| 1169115 | 1169115 | 1169810 | 1169821 + | flgH | PA1083 | 109  | 122  |
| 1169822 | 1169822 | 1170931 | 1170931 + | flgI | PA1084 | 66   | 78   |
| 1170932 | 1170942 | 1172144 | 1172162 + | flgJ | PA1085 | 91   | 93   |
| 1172163 | 1172163 | 1174214 | 1174239 + | flgK | PA1086 | 119  | 110  |
| 1174240 | 1174240 | 1175559 | 1175613 + | flgL | PA1087 | 144  | 157  |
| 1175614 | 1175614 | 1176375 | 1176379 + | -    | PA1088 | 109  | 133  |
| 1176380 | 1176380 | 1176982 | +         | -    | PA1089 | 89   | 112  |
|         | 1176958 | 1177620 | +         | -    | PA1090 | 51   | 71   |
|         | 1177613 | 1182697 | 1182704 + | fgtA | PA1091 | 69   | 96   |
| 1182825 | 1183058 | 1184524 | 1184524 + | flgC | PA1092 | 2379 | 2928 |
| 1184525 | 1184603 | 1184974 | 1184974 + | -    | PA1093 | 707  | 953  |
| 1184975 | 1185060 | 1186484 | 1186605 + | flgD | PA1094 | 538  | 704  |
| 1186606 | 1186606 | 1186986 | 1187008 + | -    | PA1095 | 655  | 783  |
| 1187009 | 1187009 | 1187305 | 1187377 + | -    | PA1096 | 596  | 715  |
| 1187513 | 1187587 | 1189059 | 1189059 + | flgQ | PA1097 | 349  | 309  |
| 1189060 | 1189172 | 1190380 | 1190380 + | flgS | PA1098 | 113  | 123  |
| 1190381 | 1190385 | 1191806 | 1191824 + | flgR | PA1099 | 112  | 87   |
| 1192047 | 1192053 | 1192382 | 1192392 + | flgE | PA1100 | 194  | 214  |
| 1192405 | 1192405 | 1194201 | 1194201 + | flgF | PA1101 | 122  | 118  |
| 1194202 | 1194207 | 1195223 | 1195224 + | flgG | PA1102 | 219  | 224  |
| 1195225 | 1195225 | 1196031 | +         | -    | PA1103 | 154  | 182  |
|         | 1196021 | 1197376 | 1197382 + | flgI | PA1104 | 88   | 103  |
| 1197383 | 1197390 | 1197833 | 1197835 + | flgJ | PA1105 | 70   | 56   |
| 1198674 | 1198551 | 1197838 | 1197836 - | -    | PA1106 | 42   | 41   |
|         | 1199946 | 1198750 | -         | -    | PA1107 | 7    | 5    |
|         | 1201220 | 1200063 | -         | -    | PA1108 | 3    | 3    |
|         | 1201310 | 1202089 | +         | -    | PA1109 | 21   | 21   |

|         |         |         |         |   |      |          |     |     |
|---------|---------|---------|---------|---|------|----------|-----|-----|
| 1202810 | 1202804 | 1202094 | 1202090 | - | -    | PA1110   | 51  | 55  |
|         | 1202917 | 1203540 | +       | + | -    | PA1111   | 2   | 1   |
|         | 1203633 | 1204781 | +       | - | -    | PA1112   | 12  | 10  |
| 1205330 |         |         | 1205031 | - | -    | PA1112.1 | 199 | 142 |
|         | 1205771 | 1207537 | +       | + | -    | PA1113   | 10  | 12  |
|         | 1207875 | 1207540 | -       | - | -    | PA1114   | 19  | 20  |
|         | 1210303 | 1207979 | -       | - | -    | PA1115   | 33  | 26  |
| 1210554 | 1210558 | 1211397 | 1211406 | + | -    | PA1116   | 77  | 129 |
| 1211808 | 1211781 | 1211407 | 1211407 | - | -    | PA1117   | 73  | 105 |
|         | 1212571 | 1211888 | -       | - | -    | PA1118   | 31  | 26  |
|         | 1213223 | 1212717 | 1212594 | - | yfiB | PA1119   | 58  | 97  |
|         | 1214502 | 1213195 | -       | - | tpbB | PA1120   | 21  | 28  |
| 1215120 | 1215074 | 1214502 | -       | - | yfiR | PA1121   | 31  | 41  |
| 1215271 | 1215284 | 1215727 | 1215727 | + | -    | PA1122   | 50  | 57  |
| 1216637 | 1216440 | 1216120 | 1215728 | - | -    | PA1123   | 36  | 70  |
| 1216671 | 1216671 | 1218167 | +       | + | dgt  | PA1124   | 27  | 26  |
| 1218168 | 1218181 | 1218933 | 1218939 | + | -    | PA1125   | 24  | 31  |
| 1219527 | 1219527 | 1218940 | 1218940 | - | -    | PA1126   | 72  | 95  |
| 1220654 | 1220610 | 1219621 | 1219528 | - | -    | PA1127   | 110 | 81  |
|         | 1220745 | 1221656 | +       | + | -    | PA1128   | 21  | 18  |
|         | 1221691 | 1222098 | +       | + | -    | PA1129   | 16  | 20  |
|         | 1223072 | 1222095 | -       | - | rhIC | PA1130   | 10  | 10  |
|         | 1224328 | 1223060 | -       | - | -    | PA1131   | 3   | 1   |
| 1224491 | 1224641 | 1225330 | 1225330 | + | -    | PA1132   | 49  | 85  |
| 1225756 | 1225690 | 1225340 | 1225331 | - | -    | PA1133   | 18  | 21  |
|         | 1226278 | 1225757 | -       | - | -    | PA1134   | 6   | 6   |
|         | 1227302 | 1226427 | -       | - | -    | PA1135   | 15  | 14  |
|         | 1227474 | 1228205 | +       | + | -    | PA1136   | 12  | 7   |
|         | 1229198 | 1228212 | -       | - | -    | PA1137   | 5   | 8   |
|         | 1229344 | 1230219 | +       | + | -    | PA1138   | 15  | 9   |
|         | 1230310 | 1231158 | +       | + | -    | PA1139   | 28  | 26  |
| 1232146 | 1232092 | 1231256 | 1231243 | - | -    | PA1140   | 61  | 116 |

|         |         |         |         |         |        |        |      |      |
|---------|---------|---------|---------|---------|--------|--------|------|------|
| 1234032 | 1233131 | 1232229 | -       | -       | PA1141 | 21     | 19   |      |
|         | 1234013 | 1233297 | 1233132 | -       | PA1142 | 38     | 37   |      |
|         | 1234748 | 1234095 | -       | -       | PA1143 | 3      | 3    |      |
|         | 1236150 | 1234816 | -       | -       | PA1144 | 2      | 2    |      |
|         | 1236644 | 1237546 | +       | -       | PA1145 | 9      | 12   |      |
|         | 1238732 | 1237551 | -       | -       | PA1146 | 5      | 5    |      |
|         | 1240324 | 1238834 | -       | -       | PA1147 | 10     | 16   |      |
|         | 1242500 | 1240584 | -       | toxA    | PA1148 | 5      | 3    |      |
|         | 1243118 | 1242750 | -       | -       | PA1149 | 5      | 5    |      |
|         | 1243591 | 1243594 | 1245663 | +       | pys2   | PA1150 | 107  | 92   |
| 1245664 | 1245665 | 1245928 | +       | imm2    | PA1151 | 760    | 680  |      |
| 1245929 | 1246444 | 1246788 | 1247931 | +       | PA1152 | 44     | 64   |      |
|         | 1248486 | 1247932 | -       | -       | PA1153 | 12     | 13   |      |
|         | 1249552 | 1249019 | -       | -       | PA1154 | 10     | 13   |      |
|         | 1251154 | 1249907 | 1249840 | -       | nrdB   | PA1155 | 705  | 740  |
|         | 1254698 | 1254309 | 1251418 | -       | nrdA   | PA1156 | 651  | 537  |
|         | 1255006 | 1255042 | 1255752 | +       | -      | PA1157 | 68   | 107  |
| 1255753 | 1256094 | 1257452 | +       | -       | PA1158 | 24     | 39   |      |
| 1257636 | 1257772 | 1257981 | 1257986 | +       | -      | PA1159 | 1800 | 2550 |
| 1258480 | 1258470 | 1258087 | 1257988 | -       | PA1160 | 113    | 153  |      |
| 1260457 | 1259291 | 1258488 | 1258488 | -       | rrmA   | PA1161 | 65   | 83   |
|         | 1260442 | 1259291 | -       | dapE    | PA1162 | 98     | 120  |      |
|         | 1263166 | 1260557 | -       | ndvB    | PA1163 | 13     | 23   |      |
|         | 1263378 | 1264190 | +       | -       | PA1164 | 80     | 108  |      |
|         | 1265008 | 1264919 | 1264191 | -       | pcp5   | PA1165 | 46   | 61   |
|         | 1265935 | 1265147 | -       | -       | PA1166 | 4      | 2    |      |
|         | 1266111 | 1266782 | +       | -       | PA1167 | 14     | 12   |      |
|         | 1267282 | 1267602 | +       | -       | PA1168 | 3      | 6    |      |
|         | 1267680 | 1269737 | +       | -       | PA1169 | 4      | 7    |      |
|         | 1270705 | 1270515 | 1269781 | 1269738 | -      | PA1170 | 33   | 75   |
| 1270874 | 1270972 | 1272168 | 1272199 | +       | PA1171 | 66     | 89   |      |
|         | 1272796 | 1272200 | -       | napC    | PA1172 | 25     | 30   |      |

|         |         |         |   |      |        |      |      |
|---------|---------|---------|---|------|--------|------|------|
|         | 1273298 | 1272807 | - | napB | PA1173 | 8    | 10   |
|         | 1275798 | 1273309 | - | napA | PA1174 | 5    | 6    |
|         | 1276124 | 1275795 | - | napD | PA1175 | 5    | 9    |
|         | 1276608 | 1276117 | - | napF | PA1176 | 6    | 4    |
|         | 1276784 | 1276617 | - | napE | PA1177 | 14   | 12   |
| 1276975 | 1277006 | 1277608 | + | oprH | PA1178 | 1970 | 2100 |
| 1277610 | 1277688 | 1278365 | + | phoP | PA1179 | 416  | 437  |
|         | 1278362 | 1279708 | + | phoQ | PA1180 | 99   | 121  |
| 1279810 | 1279810 | 1283172 | + | -    | PA1181 | 18   | 41   |
| 1284184 | 1284177 | 1283176 | - | -    | PA1182 | 16   | 28   |
|         | 1284513 | 1285823 | + | dcfA | PA1183 | 4    | 5    |
|         | 1286788 | 1285898 | - | -    | PA1184 | 18   | 15   |
|         | 1286990 | 1287619 | + | -    | PA1185 | 4    | 2    |
|         | 1287616 | 1288635 | + | -    | PA1186 | 3    | 2    |
|         | 1288737 | 1289876 | + | -    | PA1187 | 6    | 5    |
|         | 1289965 | 1291146 | + | -    | PA1188 | 9    | 10   |
|         | 1291645 | 1291148 | - | -    | PA1189 | 14   | 21   |
|         | 1292412 | 1291813 | - | -    | PA1190 | 11   | 11   |
|         | 1293164 | 1292571 | - | -    | PA1191 | 13   | 7    |
| 1293250 | 1293267 | 1294091 | + | -    | PA1192 | 196  | 297  |
| 1294138 | 1294138 | 1294809 | + | -    | PA1193 | 104  | 146  |
|         | 1296229 | 1294811 | - | -    | PA1194 | 12   | 17   |
|         | 1297098 | 1296334 | - | -    | PA1195 | 8    | 5    |
|         | 1297309 | 1298709 | + | -    | PA1196 | 47   | 36   |
| 1298715 | 1298722 | 1299492 | + | -    | PA1197 | 35   | 50   |
| 1299558 | 1299558 | 1300175 | + | -    | PA1198 | 413  | 564  |
| 1300216 | 1300258 | 1300791 | + | -    | PA1199 | 204  | 129  |
| 1300811 | 1300811 | 1301473 | + | -    | PA1200 | 70   | 46   |
|         | 1302395 | 1301481 | - | -    | PA1201 | 31   | 29   |
| 1302621 | 1302696 | 1303313 | + | -    | PA1202 | 41   | 28   |
|         | 1303457 | 1303864 | + | -    | PA1203 | 37   | 23   |
| 1303865 | 1303892 | 1304449 | + | -    | PA1204 | 46   | 30   |

|         |         |         |           |      |        |     |     |
|---------|---------|---------|-----------|------|--------|-----|-----|
| 1304476 | 1304476 | 1305423 | +         | -    | PA1205 | 29  | 22  |
| 1305424 | 1305583 | 1306056 | 1306058 + | -    | PA1206 | 75  | 90  |
| 1306059 | 1306059 | 1307900 | 1308066 + | kefB | PA1207 | 71  | 80  |
|         | 1308067 | 1309566 | +         | -    | PA1208 | 14  | 15  |
|         | 1310518 | 1309583 | -         | -    | PA1209 | 14  | 10  |
|         | 1311386 | 1310688 | -         | -    | PA1210 | 7   | 9   |
|         | 1312139 | 1311504 | -         | -    | PA1211 | 2   | 2   |
|         | 1313365 | 1312136 | -         | -    | PA1212 | 1   | 2   |
|         | 1314321 | 1313362 | -         | -    | PA1213 | 2   | 1   |
|         | 1315916 | 1314318 | -         | -    | PA1214 | 3   | 2   |
|         | 1317202 | 1315916 | -         | -    | PA1215 | 2   | 2   |
|         | 1318150 | 1317404 | -         | -    | PA1216 | 9   | 6   |
|         | 1319514 | 1318147 | -         | -    | PA1217 | 8   | 9   |
|         | 1320389 | 1319511 | -         | -    | PA1218 | 4   | 5   |
|         | 1321000 | 1320386 | -         | -    | PA1219 | 2   | 3   |
|         | 1322256 | 1320994 | -         | -    | PA1220 | 3   | 1   |
|         | 1324109 | 1322253 | -         | -    | PA1221 | 2   | 1   |
| 1326045 | 1325950 | 1324793 | 1324512 - | -    | PA1222 | 46  | 65  |
|         | 1326939 | 1326046 | -         | -    | PA1223 | 19  | 15  |
|         | 1327024 | 1327803 | +         | -    | PA1224 | 32  | 27  |
|         | 1328439 | 1327813 | 1327813 - | -    | PA1225 | 29  | 23  |
|         | 1328545 | 1329153 | +         | -    | PA1226 | 27  | 26  |
| 1329155 | 1329192 | 1330040 | 1330051 + | -    | PA1227 | 92  | 69  |
| 1330467 | 1330467 | 1330117 | 1330108 - | -    | PA1228 | 263 | 216 |
|         | 1331383 | 1330577 | -         | -    | PA1229 | 16  | 12  |
|         | 1331517 | 1331714 | +         | -    | PA1230 | 1   | 3   |
|         | 1331727 | 1332635 | +         | -    | PA1231 | 2   | 2   |
|         | 1332635 | 1334674 | +         | -    | PA1232 | 2   | 3   |
|         | 1334671 | 1334928 | +         | -    | PA1233 | 18  | 21  |
| 1335535 | 1335453 | 1334950 | 1334929 - | -    | PA1234 | 27  | 29  |
|         | 1335645 | 1336427 | +         | -    | PA1235 | 21  | 15  |
|         | 1337941 | 1336430 | -         | -    | PA1236 | 3   | 3   |

|         |         |         |         |      |              |        |     |
|---------|---------|---------|---------|------|--------------|--------|-----|
| 1342802 | 1339082 | 1337931 | -       | -    | PA1237       | 3      | 2   |
|         | 1340527 | 1339079 | -       | -    | PA1238       | 1      | 1   |
|         | 1341794 | 1340910 | -       | -    | PA1239       | 3      | 3   |
|         | 1342648 | 1341851 | -       | -    | PA1240       | 8      | 3   |
| 1348059 | 1342813 | 1343373 | 1343452 | +    | PA1241       | 36     | 36  |
|         | 1343453 | 1345225 | +       | -    | PA1242       | 9      | 7   |
|         | 1347824 | 1345248 | 1345226 | -    | PA1243       | 31     | 45  |
|         | 1348626 | 1348060 | 1348060 | -    | PA1244       | 354    | 508 |
| 1349235 | 1349416 | 1350660 | 1349415 | ?    | predicted RN | 159    | 64  |
|         |         |         | +       | -    | PA1245       | 40     | 17  |
|         |         |         | +       | aprD | PA1246       | 9      | 4   |
|         |         |         | +       | aprE | PA1247       | 10     | 4   |
| 1355607 | 1353827 | 1355272 | +       | aprF | PA1248       | 8      | 3   |
|         |         |         | 1355630 | ?    | predicted RN | 23     | 13  |
|         |         |         | 1357070 | +    | aprA         | PA1249 | 15  |
|         |         |         | 1357712 | +    | aprI         | PA1250 | 92  |
| 1357198 | 1359350 | 1357725 | 1357725 | -    | PA1251       | 20     | 24  |
|         | 1359590 | 1360594 | +       | -    | PA1252       | 6      | 5   |
|         | 1362278 | 1360698 | -       | -    | PA1253       | 2      | 2   |
|         | 1363288 | 1362371 | -       | -    | PA1254       | 1      | 2   |
| 1371738 | 1364473 | 1363439 | -       | -    | PA1255       | 2      | 0   |
|         | 1365221 | 1364499 | -       | -    | PA1256       | 3      | 4   |
|         | 1365862 | 1365218 | -       | -    | PA1257       | 4      | 6   |
|         | 1366538 | 1365873 | -       | -    | PA1258       | 2      | 2   |
| 1373945 | 1368280 | 1366538 | -       | -    | PA1259       | 4      | 3   |
|         | 1369160 | 1368339 | -       | -    | PA1260       | 2      | 2   |
|         | 1370092 | 1369418 | -       | -    | PA1261       | 7      | 7   |
|         | 1371699 | 1370257 | -       | -    | PA1262       | 2      | 2   |
| 1376097 | 1371738 | 1372682 | 1372969 | +    | PA1263       | 44     | 50  |
|         | 1373845 | 1372979 | -       | -    | PA1264       | 7      | 10  |
|         | 1373945 | 1374847 | +       | -    | PA1265       | 2      | 2   |
|         | 1376097 | 1374844 | -       | -    | PA1266       | 2      | 1   |

|         |         |         |           |      |        |      |      |
|---------|---------|---------|-----------|------|--------|------|------|
|         | 1377442 | 1376327 | -         | -    | PA1267 | 2    | 2    |
|         | 1378383 | 1377439 | -         | -    | PA1268 | 2    | 2    |
| 1379200 | 1379168 | 1378500 | 1378437 - | -    | PA1269 | 40   | 42   |
|         | 1379413 | 1381452 | +         | -    | PA1270 | 5    | 6    |
| 1381525 | 1381804 | 1383654 | 1383717 + | -    | PA1271 | 89   | 149  |
| 1383718 | 1383718 | 1384329 | 1384360 + | cobO | PA1272 | 127  | 193  |
| 1384361 | 1384361 | 1385668 | 1385668 + | cobB | PA1273 | 60   | 82   |
| 1385669 | 1385670 | 1386326 | +         | -    | PA1274 | 54   | 88   |
|         | 1386323 | 1387261 | +         | cobD | PA1275 | 43   | 64   |
|         | 1387254 | 1388249 | +         | cobC | PA1276 | 55   | 87   |
|         | 1388242 | 1389714 | +         | cobQ | PA1277 | 62   | 94   |
|         | 1389707 | 1390228 | +         | cobP | PA1278 | 73   | 119  |
|         | 1390225 | 1391280 | +         | cobU | PA1279 | 64   | 91   |
|         | 1391277 | 1391861 | 1391863 + | -    | PA1280 | 47   | 74   |
| 1391864 | 1391864 | 1392601 | +         | cobV | PA1281 | 26   | 37   |
|         | 1394069 | 1392564 | -         | -    | PA1282 | 10   | 11   |
|         | 1394188 | 1394748 | +         | -    | PA1283 | 22   | 19   |
|         | 1396599 | 1394779 | -         | -    | PA1284 | 6    | 8    |
| 1396731 | 1396731 | 1397180 | 1397253 + | -    | PA1285 | 59   | 70   |
|         | 1397254 | 1398453 | +         | -    | PA1286 | 9    | 10   |
| 1398610 | 1398618 | 1399172 | 1399230 + | -    | PA1287 | 60   | 50   |
| 1400510 | 1400505 | 1399231 | 1399231 - | -    | PA1288 | 1266 | 1153 |
|         | 1401190 | 1400711 | -         | -    | PA1289 | 16   | 9    |
|         | 1402005 | 1401412 | -         | -    | PA1290 | 15   | 18   |
|         | 1402117 | 1402956 | +         | -    | PA1291 | 27   | 25   |
| 1404125 | 1403835 | 1402981 | 1402957 - | -    | PA1292 | 72   | 72   |
| 1405207 | 1405197 | 1404136 | 1404126 - | -    | PA1293 | 112  | 98   |
| 1405334 | 1405338 | 1406462 | +         | rnd  | PA1294 | 111  | 146  |
|         | 1406459 | 1406752 | 1406760 + | -    | PA1295 | 61   | 82   |
| 1406761 | 1407007 | 1407939 | 1407948 + | -    | PA1296 | 31   | 42   |
| 1408948 | 1408931 | 1407951 | 1407949 - | -    | PA1297 | 25   | 32   |
| 1408999 | 1408999 | 1409274 | +         | -    | PA1298 | 27   | 24   |

|         |         |         |         |   |       |          |     |     |
|---------|---------|---------|---------|---|-------|----------|-----|-----|
| 1409348 | 1409351 | 1409800 | 1409805 | + | -     | PA1299   | 92  | 165 |
| 1409806 | 1409949 | 1410476 |         | + | -     | PA1300   | 16  | 36  |
|         | 1410473 | 1411456 |         | + | -     | PA1301   | 14  | 17  |
|         | 1411585 | 1414140 |         | + | -     | PA1302   | 9   | 8   |
| 1414699 | 1414686 | 1414147 | 1414141 | - | -     | PA1303   | 29  | 38  |
| 1416901 | 1416814 | 1414763 | 1414762 | - | -     | PA1304   | 48  | 65  |
| 1416963 | 1416963 | 1417436 | 1417436 | + | -     | PA1305   | 106 | 164 |
| 1417437 | 1417500 | 1417961 | 1417961 | + | -     | PA1306   | 67  | 85  |
| 1417963 | 1417965 | 1418738 | 1418744 | + | -     | PA1307   | 88  | 97  |
| 1418765 | 1418765 | 1419289 | 1419297 | + | -     | PA1308   | 65  | 85  |
|         | 1420158 | 1419298 |         | - | -     | PA1309   | 31  | 24  |
|         | 1420326 | 1421441 |         | + | phnW  | PA1310   | 4   | 5   |
|         | 1421477 | 1422304 |         | + | phnX  | PA1311   | 7   | 9   |
|         | 1423266 | 1422355 |         | - | -     | PA1312   | 13  | 11  |
|         | 1423374 | 1424732 |         | + | -     | PA1313   | 2   | 3   |
|         | 1424746 | 1425132 |         | + | -     | PA1314   | 15  | 16  |
|         | 1425754 | 1425140 |         | - | -     | PA1315   | 29  | 20  |
|         | 1425912 | 1427453 |         | + | -     | PA1316   | 12  | 12  |
|         | 1428080 | 1429075 | 1429075 | + | cyoA  | PA1317   | 82  | 10  |
| 1431062 | 1429082 | 1431058 |         | + | cyoB  | PA1318   | 70  | 8   |
|         | 1431062 | 1431691 |         | + | cyoC  | PA1319   | 58  | 5   |
|         | 1431691 | 1432026 |         | + | cyoD  | PA1320   | 53  | 9   |
| 1432037 | 1432037 | 1432927 |         | + | cyoE  | PA1321   | 30  | 5   |
|         | 1433166 | 1435364 |         | + | -     | PA1322   | 3   | 3   |
|         | 1435493 | 1435825 | 1435825 | + | -     | PA1323   | 22  | 22  |
|         | 1435885 | 1436397 |         | + | -     | PA1324   | 12  | 11  |
| 1436491 |         |         | 1436618 | + | -     | PA1324.1 | 31  | 24  |
|         | 1436663 | 1437070 |         | + | -     | PA1325   | 31  | 18  |
|         | 1437067 | 1438614 |         | + | ilvA2 | PA1326   | 14  | 7   |
|         | 1438706 | 1440676 |         | + | -     | PA1327   | 7   | 6   |
|         | 1441547 | 1440639 |         | - | -     | PA1328   | 21  | 10  |
|         | 1441632 | 1442063 |         | + | -     | PA1329   | 2   | 0   |

|         |         |         |         |   |      |        |     |     |
|---------|---------|---------|---------|---|------|--------|-----|-----|
| 1444650 | 1442069 | 1442848 | 1442848 | + | -    | PA1330 | 22  | 19  |
|         | 1444451 | 1442904 | 1442849 | - | -    | PA1331 | 28  | 39  |
|         | 1445271 | 1444720 | 1444720 | - | -    | PA1332 | 22  | 13  |
|         | 1445611 | 1445405 |         | - | -    | PA1333 | 76  | 19  |
| 1451633 | 1446918 | 1445806 |         | - | -    | PA1334 | 6   | 4   |
|         | 1448503 | 1447226 |         | - | -    | PA1335 | 19  | 27  |
|         | 1450449 | 1448548 |         | - | -    | PA1336 | 24  | 29  |
|         | 1451633 | 1450545 | 1450533 | - | ansB | PA1337 | 94  | 240 |
| 1453469 | 1453392 | 1451719 | 1451662 | - | egt  | PA1338 | 83  | 114 |
|         | 1454204 | 1453470 | 1453470 | - | -    | PA1339 | 234 | 241 |
|         | 1454869 | 1454201 |         | - | -    | PA1340 | 178 | 182 |
|         | 1455671 | 1455612 | 1454866 | - | -    | PA1341 | 130 | 140 |
| 1456825 | 1456723 | 1455815 | 1455815 | - | -    | PA1342 | 421 | 444 |
| 1457123 | 1457175 | 1457633 | 1457686 | + | -    | PA1343 | 54  | 66  |
| 1457729 | 1457729 | 1458523 | 1458706 | + | -    | PA1344 | 38  | 40  |
|         | 1458707 | 1460296 |         | + | -    | PA1345 | 4   | 3   |
|         | 1461854 | 1460307 |         | - | -    | PA1346 | 1   | 1   |
|         | 1462630 | 1461938 |         | - | -    | PA1347 | 5   | 6   |
| 1463586 | 1462696 | 1463403 |         | + | -    | PA1348 | 6   | 6   |
|         | 1463586 | 1463936 |         | + | -    | PA1349 | 4   | 1   |
|         | 1464111 | 1464860 |         | + | -    | PA1350 | 7   | 5   |
|         | 1464878 | 1466101 |         | + | -    | PA1351 | 1   | 2   |
| 1470086 | 1467320 | 1466109 |         | - | -    | PA1352 | 2   | 2   |
|         | 1467901 | 1467488 |         | - | -    | PA1353 | 5   | 4   |
|         | 1468363 | 1467938 |         | - | -    | PA1354 | 7   | 7   |
|         | 1468510 | 1468890 |         | + | -    | PA1355 | 1   | 2   |
| 1470988 | 1468913 | 1470019 |         | + | -    | PA1356 | 2   | 1   |
|         | 1470088 | 1470564 | 1470579 | + | -    | PA1357 | 84  | 71  |
|         | 1470978 | 1470580 | 1470580 | - | -    | PA1358 | 69  | 70  |
|         | 1471672 | 1471016 |         | - | -    | PA1359 | 27  | 39  |
| 1474052 | 1471671 | 1472564 |         | + | -    | PA1360 | 39  | 44  |
|         | 1473980 | 1472547 |         | - | -    | PA1361 | 52  | 64  |

|         |         |         |         |        |        |     |     |
|---------|---------|---------|---------|--------|--------|-----|-----|
| 1474715 | 1474391 | 1474714 | +       | -      | PA1362 | 10  | 9   |
|         | 1474727 | 1475467 | +       | -      | PA1363 | 15  | 29  |
|         | 1475464 | 1476306 | +       | -      | PA1364 | 13  | 17  |
|         | 1476384 | 1478825 | +       | -      | PA1365 | 16  | 20  |
| 1480214 | 1479791 | 1479021 | 1478953 | -      | PA1366 | 64  | 53  |
|         | 1481051 | 1480215 | -       | -      | PA1367 | 18  | 21  |
|         | 1482758 | 1481334 | -       | -      | PA1368 | 18  | 15  |
| 1483112 | 1483123 | 1483875 | 1483897 | +      | PA1369 | 112 | 94  |
| 1483898 | 1483898 | 1485763 | 1486095 | +      | PA1370 | 58  | 62  |
|         | 1486967 | 1486266 | 1486266 | -      | PA1371 | 99  | 110 |
| 1489128 | 1489095 | 1486960 | -       | -      | PA1372 | 156 | 165 |
|         | 1491083 | 1489815 | -       | fabF2  | PA1373 | 25  | 29  |
|         | 1491192 | 1491698 | +       | -      | PA1374 | 21  | 16  |
| 1491699 | 1491913 | 1493055 | 1493089 | +      | PA1375 | 49  | 56  |
| 1494830 | 1494823 | 1493090 | 1493090 | -      | aceK   | 36  | 31  |
| 1494956 | 1494959 | 1495492 | 1495592 | +      | PA1377 | 44  | 43  |
|         | 1495635 | 1495997 | +       | -      | PA1378 | 20  | 25  |
|         | 1496920 | 1496087 | -       | -      | PA1379 | 6   | 3   |
|         | 1497012 | 1497977 | +       | -      | PA1380 | 13  | 14  |
| 1501430 | 1498338 | 1498829 | +       | -      | PA1381 | 10  | 11  |
|         | 1498813 | 1501092 | 1501109 | +      | PA1382 | 27  | 33  |
|         | 1501611 | 1503416 | 1503567 | +      | PA1383 | 40  | 40  |
|         | 1503568 | 1504581 | +       | galE   | PA1384 | 9   | 10  |
|         | 1504605 | 1505729 | +       | -      | PA1385 | 6   | 11  |
|         | 1505749 | 1507017 | +       | -      | PA1386 | 10  | 13  |
|         | 1507164 | 1508720 | +       | -      | PA1387 | 19  | 18  |
|         | 1508737 | 1509465 | +       | -      | PA1388 | 9   | 13  |
|         | 1509562 | 1511046 | +       | -      | PA1389 | 10  | 13  |
|         | 1511232 | 1512266 | +       | -      | PA1390 | 7   | 10  |
| 1512260 | 1514035 | +       | -       | PA1391 | 5      | 6   |     |
| 1514036 | 1515280 | +       | -       | PA1392 | 7      | 14  |     |
| 1515927 | 1515337 | -       | cysC    | PA1393 | 14     | 18  |     |

|         |         |         |   |      |        |     |     |
|---------|---------|---------|---|------|--------|-----|-----|
|         | 1516433 | 1516687 | + | -    | PA1394 | 22  | 40  |
| 1516688 | 1516703 | 1517119 | + | -    | PA1395 | 37  | 43  |
|         | 1518768 | 1517146 | - | -    | PA1396 | 24  | 25  |
|         | 1518914 | 1519546 | + | -    | PA1397 | 29  | 39  |
| 1519547 | 1519627 | 1519968 | + | -    | PA1398 | 46  | 48  |
|         | 1520904 | 1519984 | - | -    | PA1399 | 16  | 13  |
|         | 1521109 | 1524396 | + | -    | PA1400 | 3   | 4   |
|         | 1524831 | 1524424 | - | -    | PA1401 | 15  | 12  |
|         | 1525574 | 1524909 | - | -    | PA1402 | 7   | 9   |
|         | 1525667 | 1526299 | + | -    | PA1403 | 17  | 19  |
|         | 1526657 | 1526430 | - | -    | PA1404 | 10  | 13  |
| 1526813 | 1527191 | 1528783 | + | -    | PA1405 | 32  | 32  |
|         | 1529561 | 1528803 | - | -    | PA1406 | 16  | 16  |
|         | 1530538 | 1529597 | - | -    | PA1407 | 23  | 26  |
|         | 1533028 | 1530605 | - | -    | PA1408 | 4   | 4   |
|         | 1533238 | 1534278 | + | aphA | PA1409 | 4   | 8   |
|         | 1534289 | 1535380 | + | -    | PA1410 | 5   | 9   |
|         | 1535586 | 1536497 | + | -    | PA1411 | 20  | 23  |
|         | 1537650 | 1536457 | - | -    | PA1412 | 3   | 5   |
|         | 1537755 | 1538627 | + | -    | PA1413 | 17  | 9   |
| 1538683 | 1538683 | 1538916 | + | -    | PA1414 | 583 | 846 |
| 1539748 | 1539704 | 1538976 | - | -    | PA1415 | 33  | 42  |
|         | 1541131 | 1539749 | - | -    | PA1416 | 23  | 13  |
|         | 1542746 | 1541145 | - | -    | PA1417 | 21  | 5   |
|         | 1544213 | 1542822 | - | -    | PA1418 | 36  | 8   |
|         | 1545818 | 1544307 | - | -    | PA1419 | 19  | 5   |
| 1546256 | 1546256 | 1545837 | - | -    | PA1420 | 56  | 4   |
|         | 1547230 | 1546271 | - | gbuA | PA1421 | 126 | 10  |
| 1547387 | 1547437 | 1548330 | + | gbuR | PA1422 | 34  | 51  |
|         | 1549587 | 1548334 | - | bdIA | PA1423 | 17  | 23  |
|         | 1549883 | 1550494 | + | -    | PA1424 | 22  | 20  |
|         | 1550984 | 1552600 | + | -    | PA1425 | 13  | 17  |

|         |         |         |   |      |        |      |      |
|---------|---------|---------|---|------|--------|------|------|
|         | 1552641 | 1552997 | + | -    | PA1426 | 19   | 25   |
|         | 1553112 | 1553675 | + | -    | PA1427 | 21   | 26   |
|         | 1554415 | 1554846 | + | -    | PA1428 | 19   | 30   |
|         | 1555012 | 1557720 | + | -    | PA1429 | 38   | 52   |
| 1558043 | 1558171 | 1558890 | + | lasR | PA1430 | 332  | 317  |
| 1559136 | 1559122 | 1558880 | - | rsal | PA1431 | 650  | 503  |
| 1559248 | 1559254 | 1559859 | + | lasI | PA1432 | 1721 | 1921 |
|         | 1561918 | 1559966 | - | -    | PA1433 | 137  | 140  |
|         | 1562632 | 1561919 | - | -    | PA1434 | 16   | 25   |
|         | 1562813 | 1563970 | + | -    | PA1435 | 3    | 2    |
|         | 1563967 | 1567077 | + | -    | PA1436 | 4    | 3    |
|         | 1567181 | 1567870 | + | -    | PA1437 | 21   | 17   |
|         | 1567848 | 1569293 | + | -    | PA1438 | 9    | 17   |
| 1569720 | 1569709 | 1569302 | - | -    | PA1439 | 61   | 67   |
| 1570323 | 1570308 | 1569721 | - | -    | PA1440 | 357  | 444  |
| 1570468 | 1570496 | 1571779 | + | -    | PA1441 | 170  | 203  |
| 1571939 | 1572023 | 1572544 | + | -    | PA1442 | 138  | 191  |
| 1572545 | 1572552 | 1573523 | + | flhM | PA1443 | 160  | 186  |
| 1573524 | 1573551 | 1574024 | + | flhN | PA1444 | 132  | 151  |
| 1574026 | 1574026 | 1574478 | + | flhO | PA1445 | 90   | 119  |
|         | 1574475 | 1575242 | + | flhP | PA1446 | 89   | 111  |
| 1575288 | 1575290 | 1575559 | + | flhQ | PA1447 | 78   | 93   |
|         | 1575559 | 1576335 | + | flhR | PA1448 | 29   | 40   |
|         | 1576338 | 1577474 | + | flhB | PA1449 | 15   | 20   |
|         | 1577547 | 1578806 | + | -    | PA1450 | 17   | 23   |
|         | 1578839 | 1580182 | + | -    | PA1451 | 19   | 28   |
| 1580291 | 1580321 | 1582444 | + | flhA | PA1452 | 72   | 73   |
| 1582528 | 1582528 | 1583817 | + | flhF | PA1453 | 170  | 150  |
| 1583818 | 1583956 | 1584798 | + | flhN | PA1454 | 277  | 302  |
|         | 1584795 | 1585538 | + | flhA | PA1455 | 266  | 305  |
| 1585636 | 1585640 | 1586014 | + | cheY | PA1456 | 353  | 422  |
| 1586015 | 1586034 | 1586822 | + | cheZ | PA1457 | 349  | 407  |

|         |         |         |         |   |      |        |     |     |
|---------|---------|---------|---------|---|------|--------|-----|-----|
| 1586823 | 1587023 | 1589284 | 1589284 | + | -    | PA1458 | 210 | 248 |
| 1589285 | 1589338 | 1590444 | 1590503 | + | -    | PA1459 | 143 | 175 |
| 1590533 | 1590533 | 1591273 | 1591285 | + | motC | PA1460 | 86  | 131 |
| 1591286 | 1591286 | 1592176 | 1592188 | + | motD | PA1461 | 75  | 107 |
| 1592271 | 1592271 | 1593059 | 1593150 | + | -    | PA1462 | 118 | 155 |
| 1593151 | 1593151 | 1594041 | 1594086 | + | -    | PA1463 | 118 | 150 |
| 1594087 | 1594087 | 1594566 | 1594596 | + | -    | PA1464 | 369 | 468 |
| 1594597 | 1594597 | 1595004 | 1595007 | + | -    | PA1465 | 143 | 192 |
| 1595826 | 1595718 | 1595032 | 1595008 | - | -    | PA1466 | 33  | 56  |
|         | 1595827 | 1596798 |         | + | -    | PA1467 | 18  | 16  |
|         | 1596889 | 1597305 |         | + | -    | PA1468 | 13  | 18  |
|         | 1597365 | 1598087 |         | + | -    | PA1469 | 17  | 16  |
|         | 1598221 | 1598958 |         | + | -    | PA1470 | 10  | 11  |
|         | 1599320 | 1599024 |         | - | -    | PA1471 | 23  | 33  |
|         | 1599982 | 1599428 |         | - | -    | PA1472 | 13  | 21  |
| 1601970 | 1600418 | 1600083 | 1599983 | - | -    | PA1473 | 27  | 39  |
| 1602083 | 1601893 | 1600415 |         | - | -    | PA1474 | 44  | 70  |
|         | 1602179 | 1602880 |         | + | ccmA | PA1475 | 69  | 149 |
|         | 1602877 | 1603548 | 1603580 | + | ccmB | PA1476 | 49  | 106 |
| 1603609 | 1603671 | 1604429 |         | + | ccmC | PA1477 | 95  | 183 |
|         | 1604426 | 1604602 |         | + | -    | PA1478 | 87  | 131 |
|         | 1604599 | 1605087 |         | + | ccmE | PA1479 | 147 | 208 |
|         | 1605088 | 1607061 | 1607061 | + | ccmF | PA1480 | 110 | 172 |
| 1607062 | 1607065 | 1607607 |         | + | ccmG | PA1481 | 102 | 185 |
|         | 1607604 | 1608071 |         | + | ccmH | PA1482 | 112 | 174 |
|         | 1608068 | 1609291 | 1609514 | + | cydH | PA1483 | 90  | 154 |
|         | 1610544 | 1609738 | 1609738 | - | -    | PA1484 | 21  | 25  |
|         | 1610745 | 1612112 |         | + | -    | PA1485 | 1   | 2   |
|         | 1612126 | 1613226 |         | + | -    | PA1486 | 6   | 6   |
| 1614649 | 1614649 | 1613234 |         | - | -    | PA1487 | 14  | 10  |
|         | 1615908 | 1614670 |         | - | -    | PA1488 | 18  | 11  |
|         | 1617085 | 1615895 |         | - | -    | PA1489 | 19  | 10  |

|                    |         |         |   |       |        |     |     |
|--------------------|---------|---------|---|-------|--------|-----|-----|
| 1621352            | 1618265 | 1617489 | - | -     | PA1490 | 18  | 20  |
|                    | 1618612 | 1619847 | + | -     | PA1491 | 12  | 10  |
|                    | 1619907 | 1620263 | + | -     | PA1492 | 23  | 18  |
|                    | 1621343 | 1620345 | - | cysP  | PA1493 | 226 | 155 |
|                    | 1623127 | 1621472 | - | -     | PA1494 | 25  | 25  |
|                    | 1623877 | 1623251 | - | -     | PA1495 | 8   | 12  |
|                    | 1624715 | 1623864 | - | -     | PA1496 | 16  | 21  |
|                    | 1625695 | 1624781 | - | -     | PA1497 | 5   | 5   |
|                    | 1627495 | 1626062 | - | pykF  | PA1498 | 5   | 4   |
|                    | 1628762 | 1627497 | - | -     | PA1499 | 2   | 3   |
| 1634514<br>1634682 | 1629949 | 1629059 | - | -     | PA1500 | 6   | 4   |
|                    | 1630806 | 1630024 | - | -     | PA1501 | 17  | 10  |
|                    | 1632677 | 1630902 | - | gcl   | PA1502 | 5   | 3   |
|                    | 1633006 | 1633437 | + | -     | PA1503 | 6   | 4   |
|                    | 1634492 | 1633842 | - | -     | PA1504 | 107 | 144 |
|                    | 1634728 | 1635723 | + | moaA2 | PA1505 | 184 | 88  |
|                    | 1635908 | 1636237 | + | -     | PA1506 | 29  | 12  |
|                    | 1637696 | 1636329 | - | -     | PA1507 | 11  | 9   |
|                    | 1638639 | 1638379 | - | -     | PA1508 | 21  | 26  |
|                    | 1639794 | 1638652 | - | -     | PA1509 | 44  | 59  |
| 1646536<br>1647100 | 1641500 | 1639791 | - | -     | PA1510 | 29  | 32  |
|                    | 1644025 | 1641497 | - | -     | PA1511 | 21  | 15  |
|                    | 1644725 | 1644207 | - | hcpA  | PA1512 | 7   | 4   |
|                    | 1646488 | 1645211 | - | -     | PA1513 | 39  | 45  |
|                    | 1647046 | 1646537 | - | -     | PA1514 | 36  | 44  |
|                    | 1648099 | 1647101 | - | alc   | PA1515 | 20  | 26  |
|                    | 1648632 | 1648117 | - | -     | PA1516 | 38  | 48  |
|                    | 1649555 | 1648629 | - | -     | PA1517 | 36  | 44  |
|                    | 1649928 | 1650308 | + | -     | PA1518 | 30  | 25  |
|                    | 1651898 | 1650549 | - | -     | PA1519 | 3   | 5   |
| 1652206            | 1652273 | 1653052 | + | -     | PA1520 | 138 | 181 |
|                    | 1654410 | 1653106 | - | -     | PA1521 | 23  | 20  |

|         |         |         |   |       |          |     |     |
|---------|---------|---------|---|-------|----------|-----|-----|
|         | 1655319 | 1654480 | - | -     | PA1522   | 19  | 20  |
|         | 1657745 | 1655346 | - | xdnB  | PA1523   | 11  | 8   |
|         | 1659192 | 1657738 | - | xdhA  | PA1524   | 17  | 9   |
|         | 1660546 | 1659413 | - | alkB2 | PA1525   | 7   | 8   |
| 1660702 | 1660727 | 1661386 | + | -     | PA1526   | 120 | 140 |
| 1661389 | 1661412 | 1664900 | + | -     | PA1527   | 99  | 147 |
| 1665026 | 1665065 | 1665934 | + | zipA  | PA1528   | 276 | 334 |
| 1665935 | 1666025 | 1668409 | + | lig   | PA1529   | 106 | 134 |
| 1668455 | 1668455 | 1668832 | + | -     | PA1530   | 116 | 168 |
| 1668840 |         | 1669799 | + | ffs   | PA1530.1 | 30  | 35  |
|         | 1669952 | 1669086 | - | -     | PA1531   | 19  | 20  |
| 1669978 | 1669989 | 1672034 | + | dnax  | PA1532   | 132 | 169 |
| 1672035 | 1672080 | 1672406 | + | -     | PA1533   | 686 | 758 |
| 1672407 | 1672485 | 1673081 | + | recR  | PA1534   | 129 | 159 |
|         | 1673204 | 1674352 | + | -     | PA1535   | 33  | 33  |
|         | 1674904 | 1674365 | - | -     | PA1536   | 27  | 25  |
|         | 1675865 | 1674978 | - | -     | PA1537   | 7   | 9   |
|         | 1677445 | 1675862 | - | -     | PA1538   | 7   | 5   |
|         | 1677559 | 1678407 | + | -     | PA1539   | 21  | 25  |
|         | 1678590 | 1678261 | - | -     | PA1540   | 13  | 16  |
|         | 1678952 | 1678584 | - | -     | PA1541   | 9   | 7   |
| 1680436 | 1680197 | 1679361 | - | -     | PA1542   | 35  | 74  |
| 1681064 | 1680985 | 1680437 | - | apt   | PA1543   | 92  | 146 |
| 1681822 | 1681805 | 1681071 | - | anr   | PA1544   | 452 | 644 |
| 1682046 | 1682051 | 1682518 | + | -     | PA1545   | 136 | 179 |
| 1683963 | 1683949 | 1682567 | - | hemN  | PA1546   | 427 | 684 |
|         | 1684760 | 1684077 | - | -     | PA1547   | 14  | 21  |
|         | 1684962 | 1684753 | - | -     | PA1548   | 36  | 91  |
|         | 1687376 | 1684941 | - | -     | PA1549   | 21  | 40  |
| 1687923 | 1687912 | 1687373 | - | -     | PA1550   | 86  | 162 |
| 1689399 | 1689339 | 1687924 | - | -     | PA1551   | 95  | 169 |
|         | 1690513 | 1689557 | - | ccp1  | PA1552   | 952 | 875 |

|         |         |         |           |       |          |      |      |
|---------|---------|---------|-----------|-------|----------|------|------|
| 1690700 | 1690695 | 1690510 | -         | ccoQ1 | PA1552.1 | 1471 | 1519 |
| 1691312 | 1691312 | 1690701 | 1690701 - | ccoQ1 | PA1553   | 1171 | 1088 |
| 1692785 | 1692754 | 1691327 | 1691313 - | ccoN1 | PA1554   | 1134 | 1101 |
|         | 1694045 | 1693119 | 1693115 - | ccoP2 | PA1555   | 74   | 631  |
| 1694227 | 1694227 | 1694042 | -         | ccoQ2 | PA1555.1 | 287  | 988  |
| 1694851 | 1694841 | 1694233 | 1694231 - | ccoQ2 | PA1556   | 91   | 650  |
| 1696359 | 1696279 | 1694852 | 1694852 - | ccoN2 | PA1557   | 251  | 850  |
|         | 1696467 | 1697099 | +         | -     | PA1558   | 11   | 14   |
| 1697159 | 1697188 | 1697919 | +         | -     | PA1559   | 236  | 306  |
|         | 1697916 | 1698344 | 1698377 + | -     | PA1560   | 205  | 265  |
| 1699974 | 1699947 | 1698382 | 1698382 - | aer   | PA1561   | 135  | 219  |
|         | 1703052 | 1700320 | -         | acnA  | PA1562   | 31   | 33   |
| 1703123 | 1703379 | 1704437 | 1704519 + | -     | PA1563   | 60   | 93   |
| 1704522 | 1704522 | 1704761 | 1704792 + | -     | PA1564   | 89   | 99   |
| 1706103 | 1706103 | 1704793 | 1704793 - | -     | PA1565   | 30   | 23   |
|         | 1707536 | 1706172 | -         | -     | PA1566   | 12   | 6    |
|         | 1709401 | 1708004 | -         | -     | PA1567   | 5    | 8    |
|         | 1709765 | 1709412 | -         | -     | PA1568   | 5    | 9    |
|         | 1711191 | 1709821 | -         | -     | PA1569   | 3    | 2    |
| 1711474 | 1711569 | 1712450 | 1712511 + | -     | PA1570   | 40   | 32   |
| 1712703 | 1712698 | 1712519 | 1712516 - | -     | PA1571   | 96   | 121  |
| 1712879 | 1712908 | 1714053 | 1714053 + | -     | PA1572   | 44   | 38   |
| 1714057 | 1714064 | 1714660 | 1714771 + | -     | PA1573   | 26   | 35   |
| 1715082 | 1715059 | 1714778 | 1714778 - | -     | PA1574   | 182  | 207  |
|         | 1715705 | 1715154 | -         | -     | PA1575   | 11   | 10   |
| 1715805 | 1715809 | 1716675 | 1716676 + | -     | PA1576   | 44   | 40   |
| 1717053 | 1717023 | 1716682 | 1716682 - | -     | PA1577   | 54   | 81   |
|         | 1717139 | 1717894 | +         | -     | PA1578   | 10   | 10   |
| 1718312 | 1718386 | 1718994 | 1718999 + | -     | PA1579   | 315  | 188  |
| 1720434 | 1720395 | 1719109 | 1719089 - | glfA  | PA1580   | 1246 | 872  |
| 1720640 | 1720744 | 1721130 | +         | sdhC  | PA1581   | 3303 | 4560 |
|         | 1721124 | 1721492 | 1721495 + | sdhD  | PA1582   | 2470 | 3054 |

|         |         |         |           |      |              |      |      |
|---------|---------|---------|-----------|------|--------------|------|------|
| 1721496 | 1721496 | 1723268 | 1723268 + | sdhA | PA1583       | 1853 | 2062 |
| 1723269 | 1723280 | 1723987 | 1724010 + | sdhB | PA1584       | 2637 | 2866 |
| 1724011 |         |         | 1724243 ? | -    | predicted RN | 2042 | 2657 |
| 1724244 | 1724244 | 1727075 | 1727117 + | sucA | PA1585       | 1461 | 1719 |
| 1727118 | 1727118 | 1728347 | 1728415 + | sucB | PA1586       | 1289 | 1576 |
| 1728416 | 1728416 | 1729852 | 1730114 + | lpdG | PA1587       | 1425 | 1795 |
| 1730118 | 1730181 | 1731347 | +         | sucC | PA1588       | 3954 | 5673 |
|         | 1731347 | 1732234 | 1732234 + | sucD | PA1589       | 3444 | 4821 |
| 1732235 |         |         | 1732258 ? | -    | predicted RN | 937  | 1195 |
| 1732347 | 1732545 | 1733858 | 1733877 + | brab | PA1590       | 71   | 102  |
| 1733970 | 1734004 | 1734768 | 1734826 + | -    | PA1591       | 30   | 105  |
| 1735068 | 1735063 | 1734827 | 1734827 - | -    | PA1592       | 635  | 945  |
| 1735069 |         |         | 1735078 ? | -    | predicted RN | 357  | 514  |
| 1735227 | 1735236 | 1735709 | +         | -    | PA1593       | 53   | 83   |
|         | 1735706 | 1736152 | 1736179 + | -    | PA1594       | 42   | 65   |
| 1736180 | 1736189 | 1737418 | 1737526 + | -    | PA1595       | 25   | 43   |
| 1737534 | 1737536 | 1739440 | 1739452 + | htpG | PA1596       | 1033 | 1449 |
| 1739484 | 1739508 | 1740233 | 1740243 + | -    | PA1597       | 81   | 110  |
| 1741077 | 1741065 | 1740244 | 1740244 - | -    | PA1598       | 24   | 28   |
|         | 1741146 | 1741928 | +         | -    | PA1599       | 25   | 18   |
|         | 1743240 | 1741939 | -         | -    | PA1600       | 33   | 6    |
|         | 1745536 | 1743290 | 1743290 - | -    | PA1601       | 67   | 6    |
|         | 1746024 | 1745533 | -         | -    | PA1602       | 119  | 10   |
|         | 1746653 | 1746231 | -         | -    | PA1603       | 18   | 24   |
|         | 1747597 | 1746692 | -         | -    | PA1604       | 35   | 25   |
|         | 1747596 | 1748630 | +         | -    | PA1605       | 10   | 6    |
|         | 1748699 | 1749175 | +         | -    | PA1606       | 11   | 9    |
| 1749792 | 1749789 | 1749349 | 1749288 - | -    | PA1607       | 125  | 135  |
| 1751673 | 1751520 | 1749895 | 1749795 - | -    | PA1608       | 31   | 49   |
| 1752902 | 1752891 | 1751674 | 1751674 - | fabB | PA1609       | 856  | 1472 |
| 1753482 | 1753418 | 1752903 | 1752903 - | fabA | PA1610       | 747  | 1411 |
| 1753483 |         |         | 1753496 ? | -    | predicted RN | 464  | 669  |





|         |         |         |         |   |      |        |     |     |
|---------|---------|---------|---------|---|------|--------|-----|-----|
| 1826714 | 1826675 | 1826118 | 1826043 | - |      | PA1675 | 77  | 133 |
|         | 1827052 | 1826732 | 1826732 | - |      | PA1676 | 32  | 28  |
| 1827822 | 1827821 | 1827225 | 1827210 | - |      | PA1677 | 198 | 114 |
| 1827980 | 1827992 | 1828906 | 1828911 | + | -    | PA1678 | 98  | 151 |
| 1829787 | 1829710 | 1828931 | 1828931 | - | -    | PA1679 | 69  | 83  |
|         | 1830771 | 1829788 |         | - |      | PA1680 | 8   | 8   |
| 1830867 | 1830879 | 1831970 | 1831993 | + | aroc | PA1681 | 176 | 177 |
| 1832010 | 1832014 | 1833165 |         | + | -    | PA1682 | 37  | 44  |
|         | 1833162 | 1833779 |         | + | -    | PA1683 | 86  | 109 |
|         | 1833776 | 1834321 | 1834321 | + | -    | PA1684 | 111 | 148 |
| 1834336 | 1834393 | 1835142 | 1835166 | + | masA | PA1685 | 85  | 132 |
| 1836326 | 1836218 | 1835325 | 1835315 | - | alkA | PA1686 | 47  | 55  |
| 1836332 | 1836367 | 1837227 | 1837227 | + | speE | PA1687 | 161 | 215 |
| 1837228 | 1837388 | 1838257 | 1838259 | + | -    | PA1688 | 70  | 123 |
| 1838260 | 1838260 | 1840362 | 1840369 | + | -    | PA1689 | 120 | 156 |
|         | 1841517 | 1840468 |         | - | pscU | PA1690 | 9   | 8   |
|         | 1842302 | 1841514 |         | - | pscT | PA1691 | 8   | 7   |
|         | 1842565 | 1842299 |         | - | -    | PA1692 | 26  | 21  |
|         | 1843221 | 1842568 | 1842566 | - | pscr | PA1693 | 42  | 33  |
|         | 1844147 | 1843218 |         | - | pscQ | PA1694 | 20  | 14  |
|         | 1845253 | 1844144 |         | - | pscp | PA1695 | 16  | 10  |
|         | 1845717 | 1845241 |         | - | pSCO | PA1696 | 32  | 11  |
|         | 1847036 | 1845714 |         | - |      | PA1697 | 43  | 20  |
|         | 1847227 | 1848093 |         | + | popN | PA1698 | 43  | 20  |
|         | 1848074 | 1848352 |         | + | -    | PA1699 | 37  | 17  |
|         | 1848339 | 1848710 |         | + | -    | PA1700 | 40  | 17  |
|         | 1848707 | 1849072 |         | + | -    | PA1701 | 25  | 9   |
| 1849077 | 1849077 | 1849406 |         | + | -    | PA1702 | 25  | 12  |
|         | 1849403 | 1851523 |         | + | pcrD | PA1703 | 26  | 10  |
|         | 1851520 | 1851954 |         | + | pcrR | PA1704 | 17  | 7   |
|         | 1851982 | 1852278 |         | + | pcrG | PA1705 | 25  | 8   |
|         | 1852288 | 1853172 |         | + | pcrV | PA1706 | 35  | 10  |

|         |         |         |   |      |        |     |     |
|---------|---------|---------|---|------|--------|-----|-----|
| 1853181 | 1853181 | 1853684 | + | pcrH | PA1707 | 51  | 18  |
|         | 1853665 | 1854837 | + | popB | PA1708 | 107 | 47  |
| 1854849 | 1854849 | 1855736 | + | popD | PA1709 | 89  | 37  |
| 1855862 | 1855862 | 1856299 | + | exsC | PA1710 | 202 | 135 |
| 1856305 | 1856308 | 1856553 | + | exsE | PA1711 | 132 | 85  |
| 1856554 | 1856562 | 1856975 | + | exsB | PA1712 | 78  | 59  |
| 1857269 | 1857273 | 1858109 | + | exsA | PA1713 | 108 | 64  |
| 1858135 | 1858207 | 1859037 | + | exsD | PA1714 | 120 | 77  |
| 1859071 | 1859071 | 1859493 | + | pscB | PA1715 | 52  | 27  |
|         | 1859493 | 1861295 | + | pscC | PA1716 | 40  | 22  |
|         | 1861297 | 1862595 | + | pscD | PA1717 | 26  | 14  |
|         | 1862558 | 1862761 | + | pscE | PA1718 | 57  | 28  |
| 1862762 | 1862764 | 1863021 | + | pscF | PA1719 | 126 | 50  |
| 1863024 | 1863024 | 1863371 | + | pscG | PA1720 | 54  | 31  |
|         | 1863368 | 1863799 | + | pscH | PA1721 | 58  | 26  |
|         | 1863799 | 1864137 | + | pscI | PA1722 | 72  | 34  |
|         | 1864134 | 1864880 | + | pscJ | PA1723 | 59  | 34  |
|         | 1864889 | 1865515 | + | pscK | PA1724 | 24  | 15  |
|         | 1865494 | 1866138 | + | pscL | PA1725 | 27  | 18  |
| 1868704 | 1868535 | 1866241 | - | bgIX | PA1726 | 29  | 40  |
| 1870997 | 1870763 | 1868706 | - | mucR | PA1727 | 26  | 44  |
| 1871018 | 1871116 | 1871457 | + |      | PA1728 | 55  | 55  |
| 1871458 | 1871555 | 1872202 | + |      | PA1729 | 46  | 49  |
|         | 1872602 | 1874014 | + |      | PA1730 | 7   | 7   |
|         | 1874017 | 1874970 | + |      | PA1731 | 7   | 9   |
|         | 1874967 | 1875767 | + |      | PA1732 | 7   | 8   |
|         | 1875849 | 1876580 | + |      | PA1733 | 13  | 11  |
|         | 1877409 | 1876588 | - |      | PA1734 | 17  | 11  |
|         | 1877522 | 1878409 | + |      | PA1735 | 17  | 25  |
|         | 1878980 | 1880185 | + |      | PA1736 | 7   | 11  |
|         | 1880199 | 1882343 | + |      | PA1737 | 8   | 13  |
| 1883578 | 1883509 | 1882595 | - |      | PA1738 | 46  | 43  |
|         |         | 1882344 | - |      |        |     |     |

|         |         |         |      |              |     |     |
|---------|---------|---------|------|--------------|-----|-----|
| 1883661 | 1884632 | +       | -    | PA1739       | 7   | 6   |
| 1884655 | 1885653 | +       | -    | PA1740       | 15  | 11  |
| 1886033 | 1885662 | -       | -    | PA1741       | 70  | 56  |
| 1886255 | 1886278 | 1887000 | -    | PA1742       | 251 | 157 |
| 1886260 | 1887297 | 1887058 | -    | PA1743       | 6   | 7   |
|         | 1887543 | 1887325 | -    | PA1744       | 7   | 5   |
|         | 1888186 | 1887698 | -    | PA1745       | 4   | 4   |
| 1888369 | 1888407 | 1888913 | -    | PA1746       | 49  | 60  |
|         | 1889173 | 1888985 | -    | PA1747       | 16  | 34  |
| 1890023 | 1890012 | 1889323 | -    | PA1748       | 70  | 93  |
| 1890196 | 1890196 | 1890681 | -    | PA1749       | 163 | 189 |
| 1891887 | 1891815 | 1890739 | -    | PA1750       | 372 | 445 |
| 1892064 | 1892133 | 1892510 | -    | PA1751       | 49  | 53  |
|         | 1892510 | 1893457 | -    | PA1752       | 53  | 73  |
| 1893605 | 1893620 | 1894117 | -    | PA1753       | 45  | 78  |
| 1894228 | 1894249 | 1895223 | cysB | PA1754       | 197 | 185 |
| 1895641 | 1895627 | 1895280 | -    | PA1755       | 41  | 51  |
| 1896495 | 1896495 | 1895692 | cysH | PA1756       | 57  | 105 |
| 1896609 | 1896630 | 1897247 | thrH | PA1757       | 138 | 203 |
| 1898651 | 1898651 | 1897290 | pabB | PA1758       | 77  | 86  |
| 1898661 | 1898816 | 1901521 | -    | PA1759       | 44  | 67  |
| 1901524 | 1901524 | 1904247 | -    | PA1760       | 23  | 56  |
| 1904479 | 1904479 | 1904916 | -    | PA1761       | 19  | 36  |
|         | 1904995 | 1905756 | -    | PA1762       | 10  | 21  |
|         | 1905797 | 1906822 | -    | PA1763       | 9   | 10  |
|         | 1906842 | 1908440 | -    | PA1764       | 5   | 6   |
|         | 1908454 | 1909641 | -    | PA1765       | 5   | 7   |
| 1910681 | 1910681 | 1909698 | -    | PA1766       | 286 | 491 |
| 1912216 | 1912211 | 1910685 | -    | PA1767       | 327 | 546 |
| 1912847 | 1912756 | 1912217 | -    | PA1768       | 201 | 452 |
| 1913928 | 1913871 | 1913047 | -    | PA1769       | 109 | 168 |
| 1913930 |         | 1914034 | -    | predicted RN | 355 | 670 |

|         |         |         |         |   |      |          |       |       |
|---------|---------|---------|---------|---|------|----------|-------|-------|
| 1914035 | 1914037 | 1916412 | 1916415 | + | ppsA | PA1770   | 554   | 767   |
| 1916423 | 1916482 | 1917492 | 1917593 | + | estX | PA1771   | 59    | 95    |
| 1917594 | 1917599 | 1918087 | 1918087 | + | -    | PA1772   | 237   | 259   |
| 1918093 | 1918275 | 1919273 | 1919321 | + | cmxX | PA1773   | 57    | 77    |
| 1919322 | 1919322 | 1919576 | 1919578 | + | crfX | PA1774   | 203   | 474   |
| 1919579 | 1919579 | 1920403 | 1920567 | + | cmpX | PA1775   | 192   | 397   |
| 1920568 | 1920568 | 1921065 | 1921136 | + | sigX | PA1776   | 1257  | 2276  |
| 1921137 | 1921174 | 1922226 | 1922226 | + | oprF | PA1777   | 13099 | 20254 |
| 1923043 | 1923032 | 1922295 | 1922227 | - | cobA | PA1778   | 22    | 31    |
|         | 1925770 | 1923044 | -       | - | -    | PA1779   | 3     | 3     |
|         | 1926123 | 1925797 | -       | - | nirD | PA1780   | 4     | 4     |
|         | 1928626 | 1926176 | -       | - | nirB | PA1781   | 3     | 3     |
| 1928886 |         |         | 1928666 | - | -    | PA1781.1 | 1     | 1     |
|         | 1930489 | 1928894 | -       | - | -    | PA1782   | 2     | 2     |
|         | 1931775 | 1930564 | -       | - | nasA | PA1783   | 1     | 1     |
|         | 1932824 | 1932129 | -       | - | -    | PA1784   | 5     | 7     |
|         | 1933632 | 1933054 | -       | - | -    | PA1785   | 5     | 6     |
|         | 1934857 | 1933649 | -       | - | -    | PA1786   | 3     | 6     |
| 1937754 | 1937644 | 1935035 | 1935020 | - | acnB | PA1787   | 1080  | 1457  |
| 1938021 | 1938026 | 1938493 | 1938504 | + | -    | PA1788   | 61    | 133   |
| 1939432 | 1939412 | 1938549 | 1938533 | - | -    | PA1789   | 248   | 205   |
| 1939557 | 1939583 | 1940206 | 1940211 | + | -    | PA1790   | 73    | 185   |
| 1941597 | 1941586 | 1940255 | 1940255 | - | -    | PA1791   | 96    | 158   |
| 1942446 | 1942442 | 1941720 | 1941720 | - | -    | PA1792   | 163   | 227   |
| 1942987 | 1942944 | 1942447 | 1942447 | - | ppiB | PA1793   | 1233  | 1641  |
| 1943030 | 1943067 | 1944737 | 1944746 | + | glnS | PA1794   | 416   | 625   |
| 1944747 | 1944747 | 1946129 | 1946135 | + | cvyS | PA1795   | 351   | 551   |
| 1947060 | 1947041 | 1946187 | 1946181 | - | fold | PA1796   | 213   | 355   |
| 1947320 |         |         | 1947396 | + | -    | PA1796.1 | 999   | 3570  |
| 1947448 |         |         | 1947523 | + | -    | PA1796.2 | 266   | 851   |
| 1947578 |         |         | 1947662 | + | -    | PA1796.3 | 220   | 531   |
| 1947729 |         |         | 1947804 | + | -    | PA1796.4 | 86    | 219   |

|         |         |         |   |         |          |      |
|---------|---------|---------|---|---------|----------|------|
| 1950334 | 1948502 | -       | - | PA1797  | 20       | 18   |
| 1951725 | 1950439 | 1950335 | - | parS    | PA1798   | 45   |
| 1952442 | 1952433 | 1951726 | - | parR    | PA1799   | 49   |
| 1952625 | 1952665 | 1953975 | + | tig     | PA1800   | 2734 |
| 1953976 | 1954069 | 1954710 | + | clpP    | PA1801   | 981  |
| 1954815 | 1954815 | 1956095 | + | clpX    | PA1802   | 1451 |
| 1956096 | 1956227 | 1958623 | + | lon     | PA1803   | 577  |
| 1958624 | 1958759 | 1959031 | + | hupB    | PA1804   | 9666 |
| 1959083 |         | 1959159 | + | -       | PA1804.1 | 2017 |
| 1959160 | 1959263 | 1961128 | + | ppid    | PA1805   | 416  |
| 1962032 | 1962024 | 1961227 | - | fabI    | PA1806   | 46   |
| 1963657 | 1963656 | 1962046 | - | -       | PA1807   | 36   |
| 1964681 | 1964677 | 1963658 | - | -       | PA1808   | 30   |
| 1965765 | 1965764 | 1964682 | - | -       | PA1809   | 35   |
|         | 1967618 | 1965771 | - | -       | PA1810   | 52   |
| 1969490 | 1969444 | 1967615 | - | -       | PA1811   | 36   |
| 1971242 | 1971239 | 1969635 | - | mltD    | PA1812   | 191  |
| 1972106 | 1972093 | 1971317 | - | 1971244 | PA1813   | 35   |
| 1972110 | 1972195 | 1972956 | + | -       | PA1814   | 53   |
| 1972957 | 1972959 | 1973405 | + | rnhA    | PA1815   | 97   |
| 1973449 | 1973470 | 1974210 | + | dnaQ    | PA1816   | 110  |
| 1974632 | 1974627 | 1974238 | - | -       | PA1817   | 61   |
| 1974794 | 1974821 | 1977076 | + | ldcA    | PA1818   | 73   |
| 1977100 | 1977100 | 1978455 | + | -       | PA1819   | 43   |
| 1979960 | 1979941 | 1978439 | - | nhab    | PA1820   | 39   |
| 1980116 | 1980165 | 1980977 | + | -       | PA1821   | 252  |
| 1980978 | 1981017 | 1982705 | + | fimL    | PA1822   | 171  |
|         | 1982705 | 1983541 | + | -       | PA1823   | 138  |
| 1984298 | 1984288 | 1983509 | - | -       | PA1824   | 42   |
|         | 1984389 | 1985033 | + | -       | PA1825   | 26   |
|         | 1985935 | 1985030 | - | -       | PA1826   | 13   |
|         | 1986067 | 1986828 | + | -       | PA1827   | 4    |

|         |         |         |         |   |      |              |     |      |
|---------|---------|---------|---------|---|------|--------------|-----|------|
| 1987756 | 1987756 | 1986989 | 1986972 | - | -    | PA1828       | 60  | 49   |
| 1988941 | 1988851 | 1987781 | 1987757 | - | -    | PA1829       | 44  | 35   |
| 1989434 | 1989423 | 1989109 | 1989085 | - | -    | PA1830       | 596 | 646  |
| 1989435 |         |         | 1989446 | ? | -    | predicted RN | 355 | 323  |
| 1990245 | 1990194 | 1989484 | 1989447 | - | -    | PA1831       | 66  | 68   |
| 1990402 | 1990428 | 1991453 | 1991487 | + | -    | PA1832       | 94  | 114  |
| 1991512 | 1991512 | 1992504 | 1992583 | + | -    | PA1833       | 82  | 111  |
| 1992584 | 1992584 | 1993474 |         | + | -    | PA1834       | 18  | 25   |
|         | 1993898 | 1993461 |         | - | -    | PA1835       | 27  | 15   |
|         | 1994021 | 1994602 |         | + | -    | PA1836       | 20  | 24   |
|         | 1995164 | 1994667 | 1994661 | - | -    | PA1837       | 98  | 188  |
| 1996850 | 1996806 | 1995148 |         | - | cysI | PA1838       | 125 | 281  |
| 1998549 | 1998549 | 1997509 | 1997250 | - | -    | PA1839       | 46  | 88   |
| 1998587 | 1998587 | 1998949 | 1998949 | + | -    | PA1840       | 97  | 165  |
| 1998950 | 1998963 | 1999460 | 1999461 | + | -    | PA1841       | 108 | 146  |
| 1999874 | 1999874 | 1999512 | 1999479 | - | -    | PA1842       | 87  | 104  |
| 2003611 | 2003593 | 1999889 | 1999875 | - | meth | PA1843       | 77  | 88   |
| 2004332 | 2004332 | 2003868 |         | - | -    | PA1844       | 26  | 33   |
| 2005133 | 2004892 | 2004374 | 2004333 | - | -    | PA1845       | 33  | 44   |
| 2005254 | 2005254 | 2007542 | 2007664 | + | cti  | PA1846       | 55  | 71   |
| 2007665 | 2007665 | 2008249 | 2008263 | + | -    | PA1847       | 291 | 279  |
|         | 2009477 | 2008308 |         | - | -    | PA1848       | 7   | 8    |
|         | 2009724 | 2009482 |         | - | -    | PA1849       | 6   | 3    |
|         | 2010751 | 2009747 |         | - | -    | PA1850       | 11  | 10   |
|         | 2011000 | 2012205 |         | + | -    | PA1851       | 9   | 16   |
| 2012583 | 2012530 | 2012255 | 2012243 | - | -    | PA1852       | 418 | 1003 |
| 2012584 |         |         | 2012673 | ? | -    | predicted RN | 179 | 14   |
| 2012769 | 2012815 | 2013678 |         | + | -    | PA1853       | 40  | 53   |
|         | 2014823 | 2013666 |         | - | -    | PA1854       | 14  | 18   |
|         | 2015136 | 2014915 |         | - | -    | PA1855       | 4   | 7    |
| 2016927 | 2016581 | 2015139 | 2015137 | - | -    | PA1856       | 27  | 25   |
| 2017888 | 2017851 | 2016928 | 2016928 | - | -    | PA1857       | 58  | 84   |

|         |         |         |   |      |        |    |    |
|---------|---------|---------|---|------|--------|----|----|
|         | 2018794 | 2017967 | - | str  | PA1858 | 12 | 14 |
|         | 2019690 | 2018803 | - | -    | PA1859 | 19 | 20 |
|         | 2019776 | 2020603 | + | -    | PA1860 | 7  | 6  |
| 2021710 | 2021710 | 2020625 | - | modC | PA1861 | 24 | 31 |
| 2022398 | 2022398 | 2021712 | - | modB | PA1862 | 34 | 55 |
| 2023199 | 2023166 | 2022411 | - | modA | PA1863 | 44 | 51 |
|         | 2023931 | 2023281 | - | -    | PA1864 | 7  | 2  |
| 2024065 | 2024065 | 2025744 | + | -    | PA1865 | 20 | 20 |
|         | 2025737 | 2028013 | + | -    | PA1866 | 20 | 16 |
|         | 2028454 | 2028981 | + | xphA | PA1867 | 5  | 4  |
|         | 2028968 | 2031298 | + | xqhA | PA1868 | 6  | 3  |
| 2031407 | 2031466 | 2031705 | + | -    | PA1869 | 60 | 49 |
|         | 2031988 | 2032413 | + | -    | PA1870 | 3  | 2  |
|         | 2032695 | 2033951 | + | lasA | PA1871 | 14 | 12 |
|         | 2034857 | 2034066 | - | -    | PA1872 | 31 | 25 |
|         | 2035940 | 2034918 | - | -    | PA1873 | 5  | 3  |
|         | 2036441 | 2043847 | + | -    | PA1874 | 6  | 6  |
|         | 2043847 | 2045124 | + | -    | PA1875 | 3  | 3  |
|         | 2045114 | 2047285 | + | -    | PA1876 | 3  | 3  |
|         | 2047275 | 2048462 | + | -    | PA1877 | 1  | 1  |
|         | 2049148 | 2048570 | - | -    | PA1878 | 10 | 13 |
|         | 2049791 | 2049237 | - | -    | PA1879 | 12 | 15 |
| 2052144 | 2052144 | 2049949 | - | -    | PA1880 | 6  | 9  |
|         | 2052610 | 2052149 | - | -    | PA1881 | 9  | 11 |
|         | 2052941 | 2053264 | + | -    | PA1882 | 12 | 9  |
|         | 2053277 | 2053675 | + | -    | PA1883 | 3  | 11 |
|         | 2054223 | 2053672 | - | -    | PA1884 | 20 | 16 |
|         | 2054309 | 2054842 | + | -    | PA1885 | 10 | 8  |
|         | 2054911 | 2057274 | + | polB | PA1886 | 13 | 20 |
|         | 2057946 | 2057278 | - | -    | PA1887 | 9  | 10 |
|         | 2059339 | 2057930 | - | -    | PA1888 | 3  | 5  |
| 2059411 | 2059569 | 2060552 | + | -    | PA1889 | 21 | 35 |
|         |         | 2060565 | + | -    |        |    |    |

|         |         |         |         |   |       |        |    |     |
|---------|---------|---------|---------|---|-------|--------|----|-----|
| 2061207 | 2061189 | 2060566 | 2060566 | - | -     | PA1890 | 47 | 53  |
|         | 2061667 | 2061278 | -       | - | -     | PA1891 | 4  | 6   |
|         | 2062401 | 2061664 | -       | - | -     | PA1892 | 3  | 9   |
|         | 2064827 | 2062398 | -       | - | -     | PA1893 | 5  | 12  |
|         | 2065545 | 2064853 | 2064828 | - | -     | PA1894 | 11 | 31  |
| 2068942 | 2066767 | 2065493 | -       | - | -     | PA1895 | 8  | 18  |
|         | 2067955 | 2066786 | -       | - | -     | PA1896 | 7  | 15  |
|         | 2068728 | 2067961 | 2067956 | - | -     | PA1897 | 11 | 24  |
|         | 2069490 | 2070203 | +       | + | qscr  | PA1898 | 8  | 9   |
|         | 2070685 | 2071173 | +       | + | phzA2 | PA1899 | 1  | 0   |
| 2086020 | 2071209 | 2071697 | +       | + | phzB2 | PA1900 | 4  | 4   |
|         | 2071721 | 2072938 | +       | + | phzC2 | PA1901 | 12 | 10  |
|         | 2072935 | 2073558 | +       | + | phzD2 | PA1902 | 3  | 2   |
|         | 2073555 | 2075438 | +       | + | phzE2 | PA1903 | 4  | 2   |
|         | 2075452 | 2076288 | +       | + | phzF2 | PA1904 | 3  | 4   |
|         | 2076311 | 2076958 | +       | + | phzG2 | PA1905 | 6  | 6   |
|         | 2077583 | 2077047 | -       | - | -     | PA1906 | 15 | 21  |
|         | 2079266 | 2077626 | -       | - | -     | PA1907 | 2  | 3   |
|         | 2080474 | 2079263 | -       | - | -     | PA1908 | 4  | 3   |
|         | 2081812 | 2080661 | -       | - | -     | PA1909 | 3  | 4   |
|         | 2084267 | 2081853 | -       | - | femA  | PA1910 | 3  | 4   |
|         | 2085426 | 2084476 | -       | - | femR  | PA1911 | 5  | 8   |
|         | 2085929 | 2085423 | -       | - | femI  | PA1912 | 9  | 27  |
|         | 2086020 | 2086701 | 2086021 | - | -     | PA1913 | 37 | 119 |
|         | 2086708 | 2088034 | -       | - | -     | PA1914 | 2  | 3   |
| 2097323 | 2090149 | 2088602 | -       | - | -     | PA1915 | 14 | 16  |
|         | 2091445 | 2090213 | -       | - | -     | PA1916 | 1  | 2   |
|         | 2091837 | 2091490 | -       | - | -     | PA1917 | 1  | 4   |
|         | 2093250 | 2091850 | -       | - | -     | PA1918 | 2  | 2   |
|         | 2094142 | 2093444 | -       | - | nrdG  | PA1919 | 9  | 10  |
|         | 2096356 | 2094329 | -       | - | nrdD  | PA1920 | 6  | 4   |
|         | 2097323 | 2096514 | -       | - | -     | PA1921 | 1  | 0   |

|         |         |         |   |      |        |     |     |
|---------|---------|---------|---|------|--------|-----|-----|
| 2104178 | 2097491 | 2099452 | + | -    | PA1922 | 2   | 1   |
|         | 2099452 | 2103297 | + | -    | PA1923 | 1   | 0   |
|         | 2103294 | 2103770 | + | -    | PA1924 | 2   | 3   |
|         | 2103770 | 2104096 | + | -    | PA1925 | 6   | 4   |
|         | 2104597 | 2106447 | + | -    | PA1926 | 62  | 78  |
|         | 2106580 | 2108880 | + | metE | PA1927 | 8   | 10  |
|         | 2109511 | 2108942 | - | rimJ | PA1928 | 13  | 15  |
|         | 2109854 | 2109558 | - | -    | PA1929 | 14  | 20  |
|         | 2110226 | 2111521 | + | -    | PA1930 | 6   | 4   |
|         | 2111691 | 2112203 | + | -    | PA1931 | 8   | 5   |
| 2115865 | 2112200 | 2113189 | + | -    | PA1932 | 10  | 8   |
|         | 2113186 | 2115390 | + | -    | PA1933 | 55  | 46  |
|         | 2115885 | 2116265 | + | -    | PA1934 | 38  | 40  |
|         | 2117734 | 2117030 | - | -    | PA1935 | 16  | 25  |
|         | 2117897 | 2118097 | + | -    | PA1936 | 34  | 47  |
|         | 2118585 | 2118893 | + | -    | PA1937 | 20  | 26  |
|         | 2118926 | 2119747 | + | -    | PA1938 | 13  | 22  |
|         | 2122575 | 2120225 | - | -    | PA1939 | 106 | 137 |
|         | 2123718 | 2122579 | - | -    | PA1940 | 25  | 49  |
|         | 2125810 | 2123897 | - | -    | PA1941 | 25  | 42  |
|         | 2126334 | 2126104 | - | -    | PA1942 | 11  | 10  |
|         | 2127493 | 2126396 | - | -    | PA1943 | 12  | 16  |
|         | 2127684 | 2129171 | + | -    | PA1944 | 13  | 17  |
|         | 2129307 | 2130635 | + | -    | PA1945 | 6   | 9   |
|         | 2130794 | 2131813 | + | rbSB | PA1946 | 158 | 99  |
| 2131835 | 2131835 | 2133367 | + | rbSA | PA1947 | 23  | 51  |
| 2133389 | 2133391 | 2134389 | + | rbSC | PA1948 | 23  | 64  |
| 2134390 | 2134393 | 2135406 | + | rbSR | PA1949 | 31  | 85  |
| 2135448 | 2135460 | 2136386 | + | rbSK | PA1950 | 38  | 91  |
|         | 2137785 | 2136520 | - | -    | PA1951 | 12  | 29  |
|         | 2138598 | 2137846 | - | -    | PA1952 | 0   | 2   |
|         | 2139292 | 2138612 | - | -    | PA1953 | 3   | 2   |

|         |         |           |       |              |     |     |
|---------|---------|-----------|-------|--------------|-----|-----|
| 2140376 | 2139354 | -         | -     | PA1954       | 3   | 4   |
| 2141002 | 2140433 | -         | -     | PA1955       | 1   | 3   |
| 2141487 | 2140999 | -         | -     | PA1956       | 1   | 2   |
| 2142317 | 2141790 | -         | -     | PA1957       | 15  | 22  |
| 2142889 | 2142314 | -         | -     | PA1958       | 32  | 54  |
| 2143067 | 2144006 | 2144013 + | back  | PA1959       | 63  | 95  |
| 2144014 | 2144077 | 2144809 + | -     | PA1960       | 32  | 39  |
|         | 2145745 | -         | -     | PA1961       | 19  | 24  |
|         | 2145894 | 2146502   | azor2 | PA1962       | 7   | 10  |
| 2146602 | 2146609 | 2146875   | -     | PA1963       | 77  | 63  |
| 2148529 | 2148526 | 2146961   | -     | PA1964       | 122 | 148 |
| 2148837 | 2148854 | 2149189   | -     | PA1965       | 42  | 58  |
| 2149467 | 2149472 | 2149843 + | -     | PA1966       | 46  | 80  |
| 2150523 | 2150364 | 2149844 - | -     | PA1967       | 48  | 57  |
| 2150524 | 2150524 | 2150781   | -     | PA1968       | 61  | 74  |
| 2150819 | 2150828 | 2151220   | -     | PA1969       | 118 | 137 |
| 2151754 | 2151526 | 2151287   | -     | PA1970       | 30  | 38  |
|         | 2153068 | 2151755   | braZ  | PA1971       | 24  | 15  |
|         | 2153594 | 2155297   | -     | PA1972       | 1   | 3   |
|         | 2155374 | 2157701   | pqqF  | PA1973       | 15  | 12  |
|         | 2157968 | 2159167   | -     | PA1974       | 2   | 1   |
|         | 2159270 | 2160433   | -     | PA1975       | 3   | 2   |
|         | 2160363 | 2163008   | ercs' | PA1976       | 2   | 2   |
|         | 2163873 | 2163010   | -     | PA1977       | 4   | 2   |
|         | 2164548 | 2163883   | erbr  | PA1978       | 22  | 4   |
|         | 2165213 | 2165863   | eras  | PA1979       | 1   | 1   |
|         | 2165876 | 2166553   | eraR  | PA1980       | 2   | 3   |
|         | 2167227 | 2166580   | -     | PA1981       | 2   | 0   |
|         | 2169152 | 2167281   | exaA  | PA1982       | 1   | 2   |
|         | 2169464 | 2169901   | exaB  | PA1983       | 0   | 0   |
| 2169988 | 2169988 | 2171508   | exac  | PA1984       | 22  | 83  |
| 2171852 |         | 2171864 ? | -     | predicted RN | 41  | 17  |

|         |         |         |         |         |        |        |        |     |     |
|---------|---------|---------|---------|---------|--------|--------|--------|-----|-----|
| 2171989 | 2171865 | 2171936 | +       | pqaA    | PA1985 | 46     | 9      |     |     |
|         | 2171989 | 2172903 | 2172903 | +       | pqbB   | PA1986 | 16     |     |     |
|         | 2172913 | 2173665 | +       | pqcC    | PA1987 | 13     | 4      |     |     |
|         | 2173662 | 2173940 | +       | pqdD    | PA1988 | 21     | 8      |     |     |
| 2185478 | 2173912 | 2175057 | 2175057 | +       | pqeE   | PA1989 | 12     |     |     |
|         | 2175062 | 2176888 | +       | pqhH    | PA1990 | 5      | 2      |     |     |
|         | 2176974 | 2178137 | +       | -       | PA1991 | 25     | 34     |     |     |
|         | 2178121 | 2179815 | +       | ercS    | PA1992 | 11     | 26     |     |     |
| 2182097 | 2181056 | 2179848 | -       | -       | PA1993 | 11     | 24     |     |     |
|         | 2181744 | 2181181 | -       | -       | PA1994 | 30     | 36     |     |     |
|         | 2182097 | 2181741 | -       | -       | PA1995 | 35     | 49     |     |     |
|         | 2182451 | 2182394 | 2182098 | -       | ppicI  | PA1996 | 40     |     |     |
| 2186260 | 2184407 | 2182452 | -       | -       | PA1997 | 20     | 22     |     |     |
|         | 2185395 | 2184475 | -       | dhcR    | PA1998 | 20     | 10     |     |     |
|         | 2185527 | 2186225 | 2186259 | +       | dhcA   | PA1999 | 19     | 370 |     |
|         | 2186260 | 2186916 | 2186926 | +       | dhcB   | PA2000 | 19     | 319 |     |
| 2188247 | 2187065 | 2188246 | 2188246 | +       | atoB   | PA2001 | 29     | 311 |     |
|         | 2188459 | 2189883 | 2190083 | +       | -      | PA2002 | 7      | 91  |     |
|         | 2190854 | 2190084 | 2190084 | -       | bclhA  | PA2003 | 9      | 49  |     |
|         | 2190890 | 2192282 | 2190891 | -       | -      | PA2004 | 5      | 10  |     |
| 2194019 | 2193989 | 2192544 | 2192454 | -       | -      | PA2005 | 21     | 47  |     |
|         | 2195470 | 2194058 | 2194058 | -       | -      | PA2006 | 11     | 111 |     |
|         | 2196132 | 2195494 | 2195477 | -       | maIA   | PA2007 | 41     | 509 |     |
|         | 2197427 | 2197427 | 2196129 | -       | fahA   | PA2008 | 59     | 558 |     |
| 2198802 | 2198730 | 2197432 | 2197428 | -       | hmgA   | PA2009 | 63     | 647 |     |
|         | 2198869 | 2198891 | 2199694 | 2199761 | +      | -      | PA2010 | 27  | 62  |
|         | 2200684 | 2200664 | 2199762 | -       | liuE   | PA2011 | 37     | 135 |     |
|         | 2202652 | 2200685 | 2200685 | -       | liuD   | PA2012 | 24     | 111 |     |
| 2205189 | 2203446 | 2202649 | -       | liuC    | PA2013 | 18     | 87     |     |     |
|         | 2205067 | 2203460 | 2203447 | -       | liuB   | PA2014 | 23     | 109 |     |
|         | 2206372 | 2206353 | 2205190 | -       | liuA   | PA2015 | 61     | 273 |     |
|         | 2206814 | 2206806 | 2206402 | 2206384 | -      | liuR   | PA2016 | 87  | 125 |

|         |         |         |           |      |        |     |     |
|---------|---------|---------|-----------|------|--------|-----|-----|
|         | 2206999 | 2207928 | +         | -    | PA2017 | 8   | 10  |
|         | 2211306 | 2208169 | -         | -    | PA2018 | 38  | 25  |
|         | 2212512 | 2211322 | -         | -    | PA2019 | 40  | 26  |
| 2212661 | 2212677 | 2213309 | 2213314 + | -    | PA2020 | 77  | 87  |
|         | 2213539 | 2213315 | -         | -    | PA2021 | 13  | 9   |
|         | 2213693 | 2215054 | +         | -    | PA2022 | 6   | 10  |
| 2215081 | 2215102 | 2215941 | 2215954 + | galU | PA2023 | 498 | 823 |
|         | 2216543 | 2216121 | -         | -    | PA2024 | 12  | 14  |
| 2216681 | 2216688 | 2218043 | 2218043 + | gor  | PA2025 | 96  | 87  |
| 2219142 | 2219099 | 2218098 | 2218069 - | -    | PA2026 | 81  | 13  |
|         | 2219645 | 2219253 | -         | -    | PA2027 | 6   | 6   |
|         | 2219778 | 2220251 | 2220251 + | -    | PA2028 | 24  | 27  |
|         | 2220275 | 2220574 | +         | -    | PA2029 | 29  | 25  |
|         | 2220906 | 2220649 | -         | -    | PA2030 | 22  | 27  |
|         | 2221157 | 2220903 | -         | -    | PA2031 | 14  | 17  |
| 2221227 | 2221337 | 2222761 | 2222895 + | -    | PA2032 | 41  | 60  |
|         | 2222896 | 2223804 | +         | -    | PA2033 | 5   | 6   |
|         | 2223804 | 2224478 | +         | -    | PA2034 | 5   | 3   |
|         | 2226144 | 2224486 | -         | -    | PA2035 | 5   | 5   |
|         | 2226879 | 2227400 | +         | -    | PA2036 | 6   | 7   |
|         | 2227541 | 2229001 | +         | -    | PA2037 | 23  | 33  |
| 2230473 | 2229440 | 2229126 | 2229006 - | -    | PA2038 | 24  | 40  |
|         | 2230183 | 2229425 | -         | -    | PA2039 | 24  | 34  |
| 2230689 | 2230689 | 2232065 | 2232076 + | -    | PA2040 | 222 | 101 |
|         | 2232222 | 2233592 | +         | -    | PA2041 | 31  | 18  |
| 2233942 | 2234080 | 2235309 | 2235315 + | -    | PA2042 | 183 | 225 |
| 2235364 | 2235430 | 2236332 | 2236490 + | -    | PA2043 | 33  | 30  |
| 2238377 | 2238366 | 2236492 | 2236492 - | -    | PA2044 | 112 | 110 |
| 2238819 | 2238801 | 2238541 | 2238378 - | -    | PA2045 | 32  | 46  |
|         | 2239267 | 2238860 | -         | -    | PA2046 | 1   | 3   |
|         | 2241291 | 2240302 | -         | -    | PA2047 | 10  | 10  |
|         | 2241705 | 2242112 | +         | -    | PA2048 | 3   | 15  |

|         |         |         |         |   |       |        |    |     |
|---------|---------|---------|---------|---|-------|--------|----|-----|
| 2244181 | 2243603 | 2242170 | 2242113 | - | -     | PA2049 | 25 | 30  |
|         | 2244492 | 2244998 | +       | + | -     | PA2050 | 1  | 2   |
|         | 2244995 | 2245948 | +       | + | -     | PA2051 | 1  | 4   |
|         | 2246456 | 2245986 | -       | - | cynS  | PA2052 | 9  | 10  |
|         | 2247158 | 2246496 | -       | - | cynT  | PA2053 | 1  | 4   |
|         | 2247273 | 2248160 | +       | + | cynR  | PA2054 | 14 | 11  |
|         | 2249582 | 2248167 | -       | - | -     | PA2055 | 4  | 3   |
|         | 2249693 | 2250595 | +       | + | -     | PA2056 | 33 | 27  |
|         | 2251275 | 2253815 | +       | + | -     | PA2057 | 2  | 3   |
|         | 2253819 | 2255627 | +       | + | -     | PA2058 | 1  | 2   |
|         | 2255629 | 2256702 | +       | + | -     | PA2059 | 3  | 2   |
|         | 2256704 | 2257720 | +       | + | -     | PA2060 | 1  | 1   |
|         | 2257722 | 2259332 | +       | + | -     | PA2061 | 3  | 3   |
|         | 2259478 | 2260659 | +       | + | -     | PA2062 | 6  | 8   |
| 2260831 | 2260862 | 2262085 | 2262104 | + | -     | PA2063 | 51 | 85  |
|         | 2263082 | 2262105 | -       | - | pcOB  | PA2064 | 13 | 20  |
|         | 2264977 | 2263079 | -       | - | pcOA  | PA2065 | 1  | 4   |
|         | 2265764 | 2265126 | -       | - | -     | PA2066 | 4  | 5   |
|         | 2266429 | 2265761 | -       | - | -     | PA2067 | 3  | 3   |
|         | 2267594 | 2266431 | -       | - | -     | PA2068 | 2  | 1   |
|         | 2269362 | 2267638 | -       | - | -     | PA2069 | 2  | 3   |
|         | 2272184 | 2269542 | -       | - | -     | PA2070 | 3  | 3   |
|         | 2272460 | 2274568 | +       | + | fusA2 | PA2071 | 17 | 17  |
|         | 2274740 | 2277334 | +       | + | -     | PA2072 | 1  | 1   |
|         | 2277552 | 2278982 | +       | + | -     | PA2073 | 8  | 5   |
|         | 2278982 | 2279794 | +       | + | -     | PA2074 | 4  | 2   |
|         | 2281578 | 2279917 | -       | - | -     | PA2075 | 2  | 4   |
| 2282241 | 2282480 | 2283382 | 2283418 | + | -     | PA2076 | 36 | 45  |
|         | 2285323 | 2283419 | -       | - | -     | PA2077 | 6  | 10  |
|         | 2287237 | 2285363 | -       | - | -     | PA2078 | 2  | 3   |
| 2289084 | 2288929 | 2287523 | 2287387 | - | -     | PA2079 | 26 | 46  |
| 2290335 | 2290335 | 2289085 | 2289085 | - | kynU  | PA2080 | 87 | 120 |

|         |         |         |         |   |      |        |     |      |
|---------|---------|---------|---------|---|------|--------|-----|------|
| 2290982 | 2290980 | 2290339 | 2290336 | - | kynB | PA2081 | 114 | 140  |
| 2291019 | 2291113 | 2291589 | 2291790 | + | -    | PA2082 | 42  | 43   |
|         | 2291791 | 2293065 |         | + | -    | PA2083 | 11  | 12   |
|         | 2293153 | 2294985 |         | + | -    | PA2084 | 4   | 6    |
|         | 2295013 | 2295522 |         | + | -    | PA2085 | 3   | 3    |
|         | 2295533 | 2296435 |         | + | -    | PA2086 | 3   | 2    |
|         | 2296432 | 2297088 |         | + | -    | PA2087 | 2   | 1    |
|         | 2297072 | 2297920 |         | + | -    | PA2088 | 2   | 3    |
|         | 2298012 | 2300663 |         | + | -    | PA2089 | 5   | 6    |
|         | 2300676 | 2301755 |         | + | -    | PA2090 | 0   | 2    |
|         | 2301752 | 2303035 |         | + | -    | PA2091 | 0   | 1    |
|         | 2303022 | 2304215 |         | + | -    | PA2092 | 1   | 2    |
|         | 2304318 | 2304827 |         | + | -    | PA2093 | 5   | 7    |
|         | 2304824 | 2305780 |         | + | -    | PA2094 | 3   | 1    |
|         | 2306627 | 2305782 |         | - | -    | PA2095 | 4   | 4    |
|         | 2307810 | 2306776 |         | - | -    | PA2096 | 7   | 7    |
|         | 2307957 | 2309432 |         | + | -    | PA2097 | 4   | 10   |
|         | 2309443 | 2310372 |         | + | -    | PA2098 | 3   | 7    |
|         | 2310357 | 2311112 |         | + | -    | PA2099 | 2   | 8    |
|         | 2312766 | 2311333 |         | - | -    | PA2100 | 32  | 31   |
|         | 2312899 | 2313789 |         | + | -    | PA2101 | 16  | 15   |
|         | 2313791 | 2314249 |         | + | -    | PA2102 | 15  | 18   |
|         | 2314512 | 2315690 |         | + | -    | PA2103 | 22  | 22   |
|         | 2315709 | 2316626 | 2316626 | + | -    | PA2104 | 31  | 36   |
| 2316627 | 2316708 | 2317403 |         | + | -    | PA2105 | 38  | 47   |
|         | 2317400 | 2318134 | 2318225 | + | -    | PA2106 | 30  | 36   |
|         | 2318624 | 2318226 |         | - | -    | PA2107 | 4   | 9    |
|         | 2318795 | 2320567 |         | + | -    | PA2108 | 3   | 37   |
| 2321125 | 2321062 | 2320586 | 2320568 | - | -    | PA2109 | 3   | 651  |
|         | 2322071 | 2321130 | 2321126 | - | -    | PA2110 | 3   | 1057 |
|         | 2322781 | 2322068 |         | - | -    | PA2111 | 6   | 2416 |
| 2323553 | 2323521 | 2322778 |         | - | -    | PA2112 | 5   | 1753 |

|         |         |         |         |   |       |              |     |      |
|---------|---------|---------|---------|---|-------|--------------|-----|------|
| 2324790 | 2324783 | 2323554 | 2323554 | - | opdO  | PA2113       | 5   | 1255 |
| 2324791 |         |         | 2324807 | ? | -     | predicted RN | 2   | 1535 |
| 2326142 | 2326079 | 2324808 | 2324808 | - | -     | PA2114       | 30  | 1882 |
| 2326269 | 2326334 | 2327287 | 2327382 | + | -     | PA2115       | 14  | 96   |
| 2327388 | 2327394 | 2328191 |         | + | -     | PA2116       | 16  | 638  |
| 2329156 | 2329156 | 2328176 |         | - | -     | PA2117       | 20  | 323  |
| 2329346 | 2329348 | 2330424 | 2330958 | + | ada   | PA2118       | 16  | 47   |
| 2332110 | 2332059 | 2330959 | 2330959 | - | -     | PA2119       | 110 | 109  |
|         | 2332820 | 2332392 |         | - | -     | PA2120       | 6   | 9    |
|         | 2333873 | 2332968 |         | - | -     | PA2121       | 10  | 6    |
|         | 2333999 | 2335135 |         | + | -     | PA2122       | 5   | 5    |
|         | 2335172 | 2336104 |         | + | -     | PA2123       | 11  | 12   |
|         | 2336209 | 2337846 |         | + | -     | PA2124       | 1   | 1    |
|         | 2337868 | 2339316 |         | + | -     | PA2125       | 2   | 10   |
| 2340397 | 2339987 | 2339352 | 2339317 | - | -     | PA2126       | 6   | 73   |
| 2342128 | 2341640 | 2340414 | 2340398 | - | -     | PA2127       | 52  | 151  |
| 2342403 | 2342493 | 2343044 | 2343044 | + | cupA1 | PA2128       | 20  | 338  |
| 2343045 | 2343132 | 2343878 |         | + | cupA2 | PA2129       | 2   | 66   |
|         | 2343862 | 2346480 |         | + | cupA3 | PA2130       | 2   | 18   |
|         | 2346477 | 2347838 |         | + | cupA4 | PA2131       | 0   | 12   |
|         | 2347828 | 2348541 |         | + | cupA5 | PA2132       | 0   | 9    |
|         | 2348538 | 2349395 |         | + | -     | PA2133       | 1   | 8    |
|         | 2349488 | 2350060 |         | + | -     | PA2134       | 1   | 5    |
|         | 2350089 | 2351453 |         | + | -     | PA2135       | 0   | 1    |
|         | 2352430 | 2351906 |         | - | -     | PA2136       | 7   | 4    |
|         | 2352532 | 2353068 |         | + | -     | PA2137       | 1   | 2    |
|         | 2353086 | 2355608 |         | + | -     | PA2138       | 1   | 1    |
|         | 2355684 | 2355806 |         | + | -     | PA2139       | 0   | 5    |
|         | 2355918 | 2356157 |         | + | -     | PA2140       | 0   | 0    |
|         | 2356168 | 2356716 |         | + | -     | PA2141       | 0   | 0    |
|         | 2356713 | 2357573 |         | + | -     | PA2142       | 1   | 0    |
|         | 2358024 | 2358311 |         | + | -     | PA2143       | 4   | 3    |

|         |         |   |      |        |    |   |
|---------|---------|---|------|--------|----|---|
| 2358364 | 2360802 | + | g gP | PA2144 | 9  | 8 |
| 2361207 | 2360809 | - | -    | PA2145 | 1  | 3 |
| 2361706 | 2361873 | + | -    | PA2146 | 1  | 0 |
| 2361954 | 2364083 | + | kate | PA2147 | 2  | 4 |
| 2364311 | 2364802 | + | -    | PA2148 | 0  | 0 |
| 2364816 | 2365058 | + | -    | PA2149 | 1  | 0 |
| 2365081 | 2365962 | + | -    | PA2150 | 1  | 1 |
| 2366106 | 2368100 | + | -    | PA2151 | 2  | 3 |
| 2368111 | 2371413 | + | -    | PA2152 | 2  | 3 |
| 2371410 | 2373608 | + | g gB | PA2153 | 1  | 1 |
| 2374605 | 2373610 | - | -    | PA2154 | 1  | 1 |
| 2375807 | 2374602 | - | -    | PA2155 | 1  | 1 |
| 2376541 | 2375804 | - | -    | PA2156 | 1  | 1 |
| 2377476 | 2376538 | - | -    | PA2157 | 7  | 3 |
| 2378727 | 2377480 | - | -    | PA2158 | 1  | 3 |
| 2379210 | 2378794 | - | -    | PA2159 | 1  | 2 |
| 2381460 | 2379310 | - | -    | PA2160 | 1  | 1 |
| 2381778 | 2381473 | - | -    | PA2161 | 0  | 1 |
| 2384555 | 2381775 | - | -    | PA2162 | 1  | 1 |
| 2386602 | 2384548 | - | -    | PA2163 | 1  | 1 |
| 2388346 | 2386595 | - | -    | PA2164 | 0  | 1 |
| 2389887 | 2388346 | - | -    | PA2165 | 1  | 2 |
| 2390255 | 2390620 | + | -    | PA2166 | 11 | 6 |
| 2390949 | 2392046 | + | -    | PA2167 | 1  | 2 |
| 2392043 | 2392819 | + | -    | PA2168 | 1  | 0 |
| 2392945 | 2393397 | + | -    | PA2169 | 0  | 1 |
| 2393424 | 2393633 | + | -    | PA2170 | 1  | 0 |
| 2393708 | 2394178 | + | -    | PA2171 | 3  | 4 |
| 2394182 | 2395258 | + | -    | PA2172 | 3  | 3 |
| 2395285 | 2395635 | + | -    | PA2173 | 4  | 4 |
| 2396252 | 2395944 | - | -    | PA2174 | 5  | 5 |
| 2396883 | 2396536 | - | -    | PA2175 | 5  | 3 |

|         |         |         |   |      |        |    |     |
|---------|---------|---------|---|------|--------|----|-----|
|         | 2397486 | 2396896 | - | -    | PA2176 | 1  | 2   |
|         | 2397569 | 2399668 | + | -    | PA2177 | 3  | 4   |
|         | 2400280 | 2399672 | - | -    | PA2178 | 1  | 1   |
|         | 2401605 | 2400655 | - | -    | PA2179 | 2  | 1   |
|         | 2402965 | 2401589 | - | -    | PA2180 | 1  | 1   |
|         | 2403151 | 2404284 | + | -    | PA2181 | 0  | 1   |
|         | 2404655 | 2404386 | - | -    | PA2182 | 3  | 10  |
|         | 2405233 | 2404949 | - | -    | PA2183 | 5  | 4   |
|         | 2405739 | 2405230 | - | -    | PA2184 | 1  | 3   |
|         | 2405993 | 2406877 | + | katN | PA2185 | 4  | 4   |
|         | 2406961 | 2407131 | + | -    | PA2186 | 0  | 2   |
|         | 2407236 | 2407661 | + | -    | PA2187 | 3  | 2   |
|         | 2408847 | 2407681 | - | -    | PA2188 | 2  | 2   |
|         | 2409107 | 2409661 | + | -    | PA2189 | 5  | 3   |
|         | 2409837 | 2410181 | + | -    | PA2190 | 3  | 1   |
|         | 2411480 | 2410344 | - | exoy | PA2191 | 18 | 8   |
|         | 2411709 | 2412122 | + | -    | PA2192 | 2  | 1   |
|         | 2412546 | 2412860 | + | hcnA | PA2193 | 55 | 98  |
|         | 2412857 | 2414251 | + | hcnB | PA2194 | 38 | 82  |
|         | 2414254 | 2415507 | + | hcnC | PA2195 | 34 | 89  |
| 2415629 | 2415661 | 2416245 | + | -    | PA2196 | 40 | 52  |
| 2416376 | 2416376 | 2417413 | + | -    | PA2197 | 60 | 50  |
|         | 2417410 | 2417754 | + | -    | PA2198 | 39 | 33  |
| 2417755 | 2417760 | 2418635 | + | -    | PA2199 | 94 | 81  |
|         | 2418723 | 2420318 | + | -    | PA2200 | 16 | 16  |
| 2420374 | 2420443 | 2421327 | + | -    | PA2201 | 28 | 26  |
| 2422020 | 2422020 | 2421343 | - | -    | PA2202 | 12 | 30  |
| 2422818 | 2422738 | 2422022 | - | -    | PA2203 | 4  | 28  |
| 2423720 | 2423625 | 2422819 | - | -    | PA2204 | 45 | 180 |
|         | 2424400 | 2423924 | - | -    | PA2205 | 13 | 17  |
|         | 2425429 | 2424482 | - | -    | PA2206 | 11 | 11  |
|         | 2427017 | 2425497 | - | -    | PA2207 | 1  | 2   |

|         |         |         |         |      |        |    |     |
|---------|---------|---------|---------|------|--------|----|-----|
|         | 2427544 | 2427014 | -       | -    | PA2208 | 0  | 2   |
|         | 2428669 | 2427572 | -       | -    | PA2209 | 1  | 2   |
|         | 2428852 | 2430177 | +       | -    | PA2210 | 2  | 1   |
|         | 2430170 | 2431129 | +       | -    | PA2211 | 2  | 4   |
|         | 2431126 | 2432139 | +       | -    | PA2212 | 2  | 5   |
|         | 2432312 | 2433562 | +       | -    | PA2213 | 1  | 1   |
|         | 2433748 | 2435070 | +       | -    | PA2214 | 1  | 0   |
|         | 2435101 | 2436276 | +       | -    | PA2215 | 2  | 6   |
|         | 2436304 | 2437299 | +       | -    | PA2216 | 1  | 3   |
|         | 2437428 | 2439011 | +       | -    | PA2217 | 1  | 3   |
|         | 2440253 | 2439150 | -       | -    | PA2218 | 9  | 12  |
|         | 2441555 | 2440347 | -       | opdE | PA2219 | 4  | 5   |
|         | 2441771 | 2442691 | +       | -    | PA2220 | 38 | 36  |
|         | 2443161 | 2444366 | +       | -    | PA2221 | 4  | 7   |
| 2445533 | 2445533 | 2444886 | -       | -    | PA2222 | 18 | 19  |
|         | 2446564 | 2445545 | -       | -    | PA2223 | 17 | 27  |
|         | 2447325 | 2446597 | -       | -    | PA2224 | 7  | 13  |
|         | 2447989 | 2447573 | -       | -    | PA2225 | 5  | 13  |
| 2448533 | 2448533 | 2448033 | -       | -    | PA2226 | 17 | 22  |
|         | 2449545 | 2448568 | -       | vqsM | PA2227 | 21 | 34  |
|         | 2450765 | 2449554 | -       | -    | PA2228 | 5  | 10  |
| 2451477 | 2451707 | 2452426 | 2452463 | +    | PA2229 | 26 | 27  |
| 2452464 | 2452469 | 2453140 | 2453441 | +    | PA2230 | 31 | 50  |
| 2453539 | 2453667 | 2455103 | +       | psIA | PA2231 | 38 | 112 |
|         | 2455103 | 2456569 | +       | psIB | PA2232 | 47 | 166 |
| 2457481 | 2456569 | 2457480 | 2457480 | +    | psIC   | 39 | 137 |
| 2458295 | 2457510 | 2458280 | 2458284 | +    | psID   | 52 | 203 |
|         | 2458295 | 2460283 | +       | psIE | PA2235 | 59 | 225 |
|         | 2460283 | 2461470 | +       | psIF | PA2236 | 32 | 131 |
|         | 2461460 | 2462788 | 2462791 | +    | psIG   | 30 | 137 |
| 2462792 | 2462797 | 2464005 | +       | psIH | PA2238 | 27 | 123 |
|         | 2463996 | 2465099 | 2465099 | +    | psII   | 18 | 94  |

|         |         |         |         |   |       |        |     |     |
|---------|---------|---------|---------|---|-------|--------|-----|-----|
| 2465100 | 2465102 | 2466538 | 2466539 | + | pslJ  | PA2240 | 16  | 78  |
| 2466540 | 2466540 | 2467949 | 2468016 | + | pslK  | PA2241 | 9   | 42  |
| 2468018 | 2468032 | 2469099 | 2469135 | + | pslL  | PA2242 | 26  | 101 |
|         | 2469286 | 2471019 |         | + | pslM  | PA2243 | 2   | 8   |
|         | 2471075 | 2472076 |         | + | pslN  | PA2244 | 13  | 11  |
|         | 2472104 | 2472409 |         | + | pslO  | PA2245 | 16  | 23  |
|         | 2472903 | 2472442 |         | - | bkdR  | PA2246 | 40  | 20  |
| 2473034 | 2473213 | 2474445 |         | + | bkdA1 | PA2247 | 75  | 917 |
|         | 2474442 | 2475494 |         | + | bkdA2 | PA2248 | 56  | 881 |
| 2476782 | 2475495 | 2476781 | 2476781 | + | bkdB  | PA2249 | 47  | 749 |
| 2479168 | 2476785 | 2478179 | 2478186 | + | lpdV  | PA2250 | 47  | 808 |
| 2479257 | 2479130 | 2478312 | 2478196 | - |       | PA2251 | 28  | 43  |
|         | 2479299 | 2480744 | 2480744 | + | -     | PA2252 | 509 | 52  |
| 2480779 | 2480844 | 2481830 | 2481834 | + | ansA  | PA2253 | 155 | 34  |
|         | 2482045 | 2483031 |         | + | pvcA  | PA2254 | 4   | 1   |
|         | 2483049 | 2483924 |         | + | pvcB  | PA2255 | 4   | 2   |
|         | 2483976 | 2485478 |         | + | pvcC  | PA2256 | 4   | 2   |
|         | 2485471 | 2486118 |         | + | pvcD  | PA2257 | 5   | 2   |
|         | 2487293 | 2486355 |         | - | ptxR  | PA2258 | 12  | 6   |
|         | 2487856 | 2488878 |         | + | ptxS  | PA2259 | 26  | 21  |
|         | 2488950 | 2489732 |         | + |       | PA2260 | 3   | 1   |
|         | 2489725 | 2490675 |         | + |       | PA2261 | 4   | 2   |
|         | 2490738 | 2492045 |         | + |       | PA2262 | 3   | 3   |
|         | 2492064 | 2493050 |         | + |       | PA2263 | 2   | 1   |
| 2493186 | 2493218 | 2493934 | 2493936 | + |       | PA2264 | 95  | 112 |
| 2493937 | 2493937 | 2495712 | 2495723 | + |       | PA2265 | 83  | 96  |
| 2495724 | 2495724 | 2497043 | 2497115 | + |       | PA2266 | 55  | 70  |
|         | 2498012 | 2497116 |         | - |       | PA2267 | 32  | 33  |
|         | 2498099 | 2499169 |         | + |       | PA2268 | 12  | 10  |
|         | 2500338 | 2499133 |         | - |       | PA2269 | 21  | 18  |
| 2500472 | 2500485 | 2501075 | 2501082 | + |       | PA2270 | 51  | 59  |
|         | 2501083 | 2501598 |         | + |       | PA2271 | 24  | 20  |



|         |         |         |           |      |        |    |    |
|---------|---------|---------|-----------|------|--------|----|----|
| 2541167 | 2541167 | 2540079 | -         | ambC | PA2304 | 15 | 18 |
| 2544946 | 2544946 | 2541197 | 2541168 - | ambB | PA2305 | 37 | 45 |
| 2545665 | 2545659 | 2545042 | 2544947 - | ambA | PA2306 | 63 | 97 |
|         | 2546635 | 2545769 | -         | -    | PA2307 | 4  | 3  |
|         | 2547500 | 2546652 | -         | -    | PA2308 | 1  | 0  |
|         | 2548530 | 2547508 | -         | -    | PA2309 | 2  | 2  |
|         | 2549458 | 2548571 | -         | -    | PA2310 | 3  | 1  |
| 2549728 | 2549748 | 2549906 | 2549960 + | -    | PA2311 | 2  | 7  |
|         | 2549961 | 2550542 | +         | -    | PA2312 | 3  | 4  |
|         | 2550626 | 2551240 | +         | -    | PA2313 | 21 | 24 |
|         | 2552675 | 2551422 | -         | -    | PA2314 | 1  | 1  |
|         | 2553850 | 2552675 | -         | -    | PA2315 | 1  | 1  |
|         | 2553965 | 2554858 | +         | -    | PA2316 | 16 | 14 |
|         | 2554962 | 2556260 | +         | -    | PA2317 | 6  | 5  |
|         | 2556293 | 2556658 | +         | -    | PA2318 | 19 | 18 |
|         | 2556948 | 2557964 | +         | -    | PA2319 | 34 | 33 |
|         | 2559949 | 2558918 | -         | gntR | PA2320 | 40 | 17 |
|         | 2560144 | 2560665 | +         | -    | PA2321 | 30 | 9  |
|         | 2560762 | 2562114 | +         | -    | PA2322 | 16 | 8  |
| 2562428 | 2562447 | 2564072 | 2564176 + | -    | PA2323 | 75 | 54 |
|         | 2564290 | 2565549 | +         | -    | PA2324 | 1  | 2  |
|         | 2565580 | 2566815 | +         | -    | PA2325 | 1  | 0  |
|         | 2568284 | 2566875 | -         | -    | PA2326 | 1  | 1  |
|         | 2569693 | 2568929 | -         | -    | PA2327 | 8  | 9  |
|         | 2570889 | 2569690 | -         | -    | PA2328 | 6  | 10 |
|         | 2571691 | 2570855 | -         | -    | PA2329 | 6  | 11 |
| 2572804 | 2572755 | 2571688 | -         | -    | PA2330 | 9  | 17 |
| 2573469 | 2573365 | 2572805 | 2572805 - | -    | PA2331 | 20 | 22 |
|         | 2573470 | 2574375 | +         | -    | PA2332 | 33 | 25 |
|         | 2575992 | 2574376 | -         | -    | PA2333 | 9  | 7  |
|         | 2577000 | 2576089 | -         | -    | PA2334 | 3  | 4  |
|         | 2577150 | 2579519 | +         | -    | PA2335 | 2  | 1  |

|         |         |         |           |      |        |    |    |
|---------|---------|---------|-----------|------|--------|----|----|
|         | 2579542 | 2580882 | +         | -    | PA2336 | 2  | 1  |
|         | 2581034 | 2581939 | +         | mtlR | PA2337 | 12 | 10 |
|         | 2582097 | 2583407 | +         | -    | PA2338 | 2  | 4  |
|         | 2583483 | 2584415 | +         | -    | PA2339 | 3  | 2  |
|         | 2584426 | 2585259 | +         | -    | PA2340 | 5  | 4  |
|         | 2585299 | 2586411 | +         | -    | PA2341 | 2  | 5  |
|         | 2586434 | 2587909 | +         | mtlD | PA2342 | 2  | 2  |
|         | 2587906 | 2589414 | +         | mtlY | PA2343 | 1  | 1  |
|         | 2589455 | 2590387 | +         | mtlZ | PA2344 | 14 | 17 |
|         | 2591665 | 2590430 | -         | -    | PA2345 | 11 | 9  |
|         | 2592084 | 2593319 | +         | -    | PA2346 | 2  | 2  |
|         | 2593330 | 2594547 | +         | -    | PA2347 | 2  | 2  |
|         | 2594565 | 2595953 | +         | -    | PA2348 | 1  | 3  |
|         | 2595985 | 2596779 | +         | -    | PA2349 | 2  | 2  |
|         | 2596776 | 2597885 | +         | -    | PA2350 | 1  | 2  |
|         | 2597869 | 2598522 | +         | -    | PA2351 | 3  | 1  |
| 2598523 | 2598700 | 2599827 | 2599892 + | -    | PA2352 | 65 | 47 |
|         | 2601047 | 2599893 | -         | -    | PA2353 | 31 | 31 |
|         | 2602349 | 2601219 | -         | -    | PA2354 | 1  | 1  |
|         | 2603530 | 2602346 | -         | -    | PA2355 | 2  | 0  |
|         | 2604705 | 2603560 | -         | msuD | PA2356 | 1  | 1  |
|         | 2605275 | 2604715 | -         | msuE | PA2357 | 1  | 1  |
|         | 2605824 | 2605435 | -         | -    | PA2358 | 25 | 8  |
|         | 2607022 | 2605937 | -         | -    | PA2359 | 4  | 3  |
|         | 2608232 | 2607132 | -         | -    | PA2360 | 2  | 3  |
|         | 2612044 | 2608229 | -         | -    | PA2361 | 3  | 2  |
|         | 2612799 | 2612041 | -         | -    | PA2362 | 3  | 4  |
| 2614148 | 2614148 | 2612817 | -         | -    | PA2363 | 7  | 7  |
|         | 2614684 | 2614208 | -         | -    | PA2364 | 15 | 9  |
|         | 2614893 | 2615438 | +         | -    | PA2365 | 10 | 4  |
| 2615461 | 2615461 | 2616945 | +         | -    | PA2366 | 6  | 7  |
| 2617019 | 2617019 | 2617516 | 2617516 + | -    | PA2367 | 5  | 5  |

|         |         |         |           |      |        |     |     |
|---------|---------|---------|-----------|------|--------|-----|-----|
|         | 2617529 | 2617954 | +         | -    | PA2368 | 2   | 1   |
|         | 2617938 | 2619731 | +         | -    | PA2369 | 1   | 2   |
|         | 2619695 | 2620711 | +         | -    | PA2370 | 1   | 1   |
|         | 2620713 | 2623262 | +         | -    | PA2371 | 2   | 4   |
|         | 2623284 | 2623856 | +         | -    | PA2372 | 18  | 20  |
|         | 2624204 | 2626210 | +         | -    | PA2373 | 7   | 12  |
|         | 2626221 | 2626757 | +         | -    | PA2374 | 2   | 5   |
|         | 2627175 | 2626780 | -         | -    | PA2375 | 3   | 4   |
|         | 2627452 | 2628093 | +         | -    | PA2376 | 10  | 8   |
|         | 2628225 | 2629499 | +         | -    | PA2377 | 5   | 3   |
|         | 2632231 | 2629916 | 2629762 - | -    | PA2378 | 93  | 53  |
| 2632725 | 2632698 | 2632228 | -         | -    | PA2379 | 179 | 105 |
| 2633284 | 2633199 | 2632963 | 2632942 - | -    | PA2380 | 44  | 52  |
|         | 2633494 | 2633736 | +         | -    | PA2381 | 29  | 16  |
|         | 2634954 | 2633803 | -         | lldA | PA2382 | 8   | 9   |
|         | 2635971 | 2635051 | -         | -    | PA2383 | 12  | 9   |
|         | 2636336 | 2636013 | -         | -    | PA2384 | 6   | 21  |
|         | 2638805 | 2636517 | -         | pvdQ | PA2385 | 1   | 2   |
| 2640391 | 2640259 | 2638928 | 2638806 - | pvdA | PA2386 | 8   | 21  |
| 2640988 | 2640871 | 2640392 | 2640392 - | fpvI | PA2387 | 57  | 69  |
| 2640993 | 2641035 | 2642030 | 2642030 + | fpvR | PA2388 | 104 | 133 |
| 2642031 | 2642131 | 2643306 | +         | pvdR | PA2389 | 18  | 29  |
|         | 2643306 | 2645297 | +         | pvdT | PA2390 | 13  | 20  |
|         | 2645303 | 2646727 | +         | opmQ | PA2391 | 13  | 18  |
|         | 2648410 | 2646776 | -         | pvdP | PA2392 | 3   | 6   |
|         | 2648626 | 2649972 | +         | -    | PA2393 | 3   | 4   |
|         | 2649995 | 2651278 | +         | pvdN | PA2394 | 3   | 5   |
|         | 2651307 | 2652161 | +         | pvdO | PA2395 | 3   | 7   |
| 2653142 | 2653057 | 2652230 | 2652162 - | pvdF | PA2396 | 16  | 24  |
|         | 2653435 | 2655084 | +         | pvdE | PA2397 | 7   | 10  |
| 2655144 | 2655187 | 2657634 | 2657639 + | fpvA | PA2398 | 38  | 87  |
|         | 2665144 | 2657798 | -         | pvdD | PA2399 | 5   | 10  |

|         |         |         |           |      |        |    |    |
|---------|---------|---------|-----------|------|--------|----|----|
| 2687442 | 2671629 | 2665156 | -         | pvdI | PA2400 | 5  | 9  |
|         | 2687178 | 2671729 | -         | -    | PA2402 | 3  | 7  |
|         | 2687497 | 2688708 | +         | -    | PA2403 | 9  | 22 |
|         | 2688705 | 2689244 | +         | -    | PA2404 | 11 | 26 |
| 2690128 | 2689241 | 2689570 | +         | -    | PA2405 | 9  | 27 |
|         | 2689567 | 2690127 | +         | -    | PA2406 | 6  | 15 |
|         | 2690160 | 2691113 | +         | -    | PA2407 | 7  | 25 |
|         | 2691110 | 2691865 | +         | -    | PA2408 | 5  | 24 |
| 2694841 | 2691862 | 2692767 | +         | -    | PA2409 | 5  | 19 |
|         | 2692764 | 2693681 | 2693692 + | -    | PA2410 | 11 | 38 |
|         | 2694545 | 2693781 | -         | -    | PA2411 | 3  | 17 |
|         | 2694764 | 2694546 | -         | -    | PA2412 | 5  | 30 |
|         | 2696251 | 2694842 | -         | pvdH | PA2413 | 1  | 5  |
|         | 2697749 | 2696430 | -         | -    | PA2414 | 2  | 3  |
|         | 2698167 | 2697742 | -         | -    | PA2415 | 5  | 3  |
|         | 2698526 | 2700163 | +         | treA | PA2416 | 3  | 3  |
|         | 2701105 | 2700167 | -         | -    | PA2417 | 15 | 16 |
|         | 2701206 | 2702066 | +         | -    | PA2418 | 4  | 3  |
|         | 2702164 | 2702844 | +         | -    | PA2419 | 9  | 7  |
|         | 2702926 | 2704344 | +         | -    | PA2420 | 3  | 3  |
|         | 2704377 | 2705297 | +         | -    | PA2421 | 4  | 3  |
|         | 2705773 | 2706087 | +         | -    | PA2422 | 7  | 8  |
|         | 2706387 | 2707181 | +         | -    | PA2423 | 37 | 35 |
|         | 2720694 | 2707666 | -         | pvdL | PA2424 | 2  | 3  |
| 2722109 | 2721531 | 2720767 | -         | pvdG | PA2425 | 1  | 2  |
|         | 2722175 | 2722738 | 2722754 + | pvdS | PA2426 | 7  | 19 |
|         | 2723222 | 2722755 | -         | -    | PA2427 | 2  | 3  |
|         | 2724223 | 2723309 | -         | -    | PA2428 | 5  | 4  |
|         | 2724485 | 2724730 | +         | -    | PA2429 | 5  | 6  |
|         | 2725771 | 2724767 | -         | -    | PA2430 | 5  | 5  |
|         | 2728141 | 2725967 | -         | -    | PA2431 | 5  | 4  |
|         | 2728542 | 2729456 | +         | bexR | PA2432 | 15 | 12 |

|         |         |         |         |   |              |     |     |
|---------|---------|---------|---------|---|--------------|-----|-----|
|         | 2729571 | 2729840 | +       | - | PA2433       | 14  | 5   |
|         | 2730521 | 2729976 | -       | - | PA2434       | 9   | 4   |
|         | 2732503 | 2730518 | -       | - | PA2435       | 15  | 7   |
| 2733025 | 2732966 | 2732532 | 2732504 | - | PA2436       | 93  | 28  |
|         | 2734160 | 2733120 | -       | - | PA2437       | 4   | 3   |
|         | 2735182 | 2734157 | -       | - | PA2438       | 5   | 4   |
|         | 2737194 | 2735194 | -       | - | PA2439       | 3   | 3   |
|         | 2737882 | 2738844 | +       | - | PA2440       | 7   | 27  |
|         | 2738841 | 2739716 | 2739716 | + | PA2441       | 23  | 140 |
| 2740910 | 2740883 | 2739762 | 2739717 | - | gcvT2 PA2442 | 50  | 305 |
| 2742353 | 2742353 | 2740977 | 2740930 | - | sdaA PA2443  | 27  | 176 |
| 2743799 | 2743657 | 2742401 | 2742354 | - | glyA2 PA2444 | 42  | 217 |
| 2746679 | 2746679 | 2743800 | 2743800 | - | gcvP2 PA2445 | 121 | 687 |
| 2747101 | 2747073 | 2746690 | 2746680 | - | gcvH2 PA2446 | 151 | 968 |
|         | 2748255 | 2747332 | -       | - | PA2447       | 6   | 5   |
|         | 2748378 | 2750120 | +       | - | PA2448       | 8   | 8   |
| 2751666 | 2751663 | 2750128 | 2750121 | - | PA2449       | 55  | 70  |
| 2752781 | 2752662 | 2751745 | 2751685 | - | PA2450       | 33  | 42  |
|         | 2753465 | 2752866 | -       | - | PA2451       | 5   | 7   |
|         | 2754445 | 2753519 | -       | - | PA2452       | 3   | 3   |
| 2754591 | 2754602 | 2754823 | 2754826 | + | PA2453       | 439 | 267 |
| 2754831 | 2754877 | 2755728 | +       | - | PA2454       | 74  | 54  |
|         | 2755725 | 2756252 | 2756252 | + | PA2455       | 63  | 48  |
| 2756281 | 2756309 | 2756650 | 2756869 | + | PA2456       | 114 | 81  |
|         | 2756918 | 2757898 | +       | - | PA2457       | 19  | 18  |
| 2757960 | 2758061 | 2759182 | 2759446 | + | PA2458       | 35  | 50  |
|         | 2760087 | 2759482 | -       | - | PA2459       | 27  | 44  |
| 2760794 | 2760619 | 2760323 | 2760088 | - | PA2460       | 45  | 59  |
| 2761357 | 2761351 | 2760872 | 2760852 | - | PA2461       | 75  | 134 |
| 2778804 | 2778804 | 2761921 | 2761358 | - | PA2462       | 47  | 79  |
| 2780667 | 2780614 | 2778917 | 2778805 | - | PA2463       | 43  | 60  |
| 2781460 | 2781451 | 2780927 | 2780696 | - | PA2464       | 57  | 49  |

|                               |         |         |   |      |        |     |    |
|-------------------------------|---------|---------|---|------|--------|-----|----|
| 2786928                       | 2782646 | 2781498 | - | -    | PA2465 | 0   | 1  |
|                               | 2785226 | 2782764 | - | foxA | PA2466 | 4   | 4  |
|                               | 2786356 | 2785370 | - | foxR | PA2467 | 15  | 12 |
|                               | 2786883 | 2786365 | - | foxI | PA2468 | 33  | 35 |
|                               | 2787886 | 2786972 | - | -    | PA2469 | 16  | 11 |
|                               | 2788011 | 2789072 | + | gtDA | PA2470 | 2   | 1  |
|                               | 2789085 | 2789783 | + | -    | PA2471 | 3   | 2  |
|                               | 2789861 | 2791207 | + | -    | PA2472 | 0   | 0  |
|                               | 2791220 | 2791864 | + | -    | PA2473 | 2   | 2  |
|                               | 2791906 | 2792817 | + | -    | PA2474 | 1   | 2  |
| 2801447<br>2802551<br>2803342 | 2794133 | 2792799 | - | -    | PA2475 | 5   | 6  |
|                               | 2794976 | 2794206 | - | dsbG | PA2476 | 31  | 25 |
|                               | 2795809 | 2794973 | - | -    | PA2477 | 11  | 7  |
|                               | 2797572 | 2795809 | - | -    | PA2478 | 12  | 12 |
|                               | 2797735 | 2798415 | + | -    | PA2479 | 40  | 28 |
|                               | 2798412 | 2799734 | + | -    | PA2480 | 64  | 41 |
|                               | 2800785 | 2799910 | - | -    | PA2481 | 153 | 81 |
|                               | 2801435 | 2800782 | - | -    | PA2482 | 212 | 95 |
|                               | 2802551 | 2801550 | - | -    | PA2483 | 89  | 69 |
|                               | 2803316 | 2802702 | - | -    | PA2484 | 55  | 53 |
| 2807376<br>2807450            | 2803345 | 2803623 | + | -    | PA2485 | 16  | 17 |
|                               | 2803640 | 2803834 | + | -    | PA2486 | 14  | 13 |
|                               | 2804132 | 2803860 | - | -    | PA2487 | 8   | 5  |
|                               | 2804230 | 2804994 | + | -    | PA2488 | 12  | 12 |
|                               | 2805021 | 2805836 | + | -    | PA2489 | 16  | 10 |
|                               | 2805917 | 2806291 | + | -    | PA2490 | 13  | 8  |
|                               | 2807369 | 2806350 | - | -    | PA2491 | 87  | 76 |
|                               | 2807469 | 2808512 | + | mexT | PA2492 | 34  | 33 |
|                               | 2808743 | 2809987 | + | mexE | PA2493 | 1   | 1  |
|                               | 2810009 | 2813197 | + | mexF | PA2494 | 4   | 3  |
|                               | 2813194 | 2814612 | + | oprN | PA2495 | 6   | 6  |
|                               | 2815282 | 2814767 | - | -    | PA2496 | 16  | 16 |

|         |         |         |   |      |        |     |     |
|---------|---------|---------|---|------|--------|-----|-----|
| 2818886 | 2816219 | 2815341 | - | -    | PA2497 | 12  | 11  |
|         | 2816347 | 2816979 | + | -    | PA2498 | 6   | 3   |
|         | 2816997 | 2817452 | + | -    | PA2499 | 5   | 5   |
|         | 2817449 | 2818675 | + | -    | PA2500 | 23  | 24  |
|         | 2818886 | 2818719 | - | -    | PA2501 | 222 | 156 |
|         | 2820489 | 2818990 | - | -    | PA2502 | 26  | 37  |
|         | 2820448 | 2821701 | + | -    | PA2503 | 40  | 36  |
|         | 2822322 | 2821705 | - | -    | PA2504 | 11  | 12  |
|         | 2823920 | 2822574 | - | opdT | PA2505 | 3   | 2   |
|         | 2824283 | 2824501 | + | -    | PA2506 | 1   | 2   |
|         | 2825591 | 2824659 | - | catA | PA2507 | 1   | 2   |
|         | 2825926 | 2825636 | - | catC | PA2508 | 1   | 2   |
|         | 2827079 | 2825958 | - | catB | PA2509 | 1   | 1   |
|         | 2827241 | 2828113 | + | catR | PA2510 | 12  | 7   |
| 2855325 | 2829123 | 2828122 | - | -    | PA2511 | 6   | 7   |
|         | 2829440 | 2830834 | + | antA | PA2512 | 4   | 3   |
|         | 2830831 | 2831322 | + | antB | PA2513 | 3   | 2   |
|         | 2831341 | 2832363 | + | antC | PA2514 | 2   | 1   |
|         | 2833130 | 2832369 | - | xyL  | PA2515 | 2   | 1   |
|         | 2834168 | 2833155 | - | xyLZ | PA2516 | 1   | 1   |
|         | 2834690 | 2834202 | - | xyLY | PA2517 | 0   | 0   |
|         | 2836054 | 2834687 | - | xyIX | PA2518 | 1   | 0   |
|         | 2837127 | 2836171 | - | xyIS | PA2519 | 7   | 4   |
|         | 2840489 | 2837334 | - | czcA | PA2520 | 3   | 2   |
|         | 2841966 | 2840512 | - | czcB | PA2521 | 2   | 2   |
|         | 2843305 | 2842019 | - | czcC | PA2522 | 0   | 0   |
|         | 2843818 | 2844492 | + | -    | PA2523 | 10  | 6   |
|         | 2844489 | 2845907 | + | -    | PA2524 | 13  | 9   |
| 2855325 | 2847779 | 2846283 | - | -    | PA2525 | 13  | 21  |
|         | 2850886 | 2847776 | - | -    | PA2526 | 11  | 18  |
|         | 2854014 | 2850883 | - | -    | PA2527 | 20  | 22  |
|         | 2855291 | 2854011 | - | -    | PA2528 | 30  | 35  |

|         |         |         |           |      |        |     |     |
|---------|---------|---------|-----------|------|--------|-----|-----|
| 2855546 | 2855548 | 2856981 | +         | -    | PA2529 | 67  | 62  |
|         | 2856981 | 2858306 | 2858314 + | -    | PA2530 | 55  | 43  |
|         | 2858503 | 2859627 | +         | -    | PA2531 | 9   | 7   |
| 2860280 | 2860274 | 2859777 | 2859683 - | tpx  | PA2532 | 195 | 160 |
| 2861831 | 2861758 | 2860409 | 2860323 - | -    | PA2533 | 45  | 95  |
|         | 2862825 | 2861914 | -         | -    | PA2534 | 19  | 13  |
|         | 2862944 | 2863939 | +         | -    | PA2535 | 24  | 27  |
| 2865106 | 2865105 | 2864170 | 2864073 - | -    | PA2536 | 82  | 118 |
| 2865736 | 2865736 | 2865107 | 2865107 - | -    | PA2537 | 66  | 103 |
|         | 2866200 | 2865748 | 2865737 - | -    | PA2538 | 32  | 58  |
| 2867506 | 2867506 | 2866193 | -         | -    | PA2539 | 29  | 44  |
| 2869391 | 2869302 | 2867542 | 2867507 - | -    | PA2540 | 46  | 64  |
| 2870049 | 2870027 | 2869392 | 2869392 - | -    | PA2541 | 81  | 106 |
|         | 2873827 | 2870162 | -         | -    | PA2542 | 21  | 24  |
| 2875659 | 2875563 | 2873824 | -         | -    | PA2543 | 34  | 38  |
|         | 2876410 | 2875697 | -         | -    | PA2544 | 18  | 14  |
| 2876550 | 2876555 | 2877367 | 2877373 + | xthA | PA2545 | 160 | 116 |
|         | 2877908 | 2877477 | -         | -    | PA2546 | 25  | 25  |
|         | 2877999 | 2878916 | +         | -    | PA2547 | 10  | 6   |
|         | 2878976 | 2880370 | +         | -    | PA2548 | 4   | 3   |
|         | 2880520 | 2881563 | +         | -    | PA2549 | 23  | 14  |
|         | 2882983 | 2881754 | -         | -    | PA2550 | 14  | 12  |
| 2882984 | 2883157 | 2884089 | 2884188 + | -    | PA2551 | 58  | 69  |
| 2885361 | 2885333 | 2884206 | 2884206 - | -    | PA2552 | 17  | 164 |
| 2886569 | 2886552 | 2885362 | 2885362 - | -    | PA2553 | 10  | 187 |
| 2887356 | 2887337 | 2886570 | 2886570 - | -    | PA2554 | 9   | 132 |
| 2889045 | 2889024 | 2887357 | 2887357 - | -    | PA2555 | 6   | 88  |
|         | 2890287 | 2889202 | -         | -    | PA2556 | 10  | 15  |
| 2892143 | 2892050 | 2890356 | 2890288 - | -    | PA2557 | 9   | 30  |
| 2892248 | 2892271 | 2892963 | 2893285 + | -    | PA2558 | 35  | 35  |
| 2893905 | 2893828 | 2893286 | 2893286 - | -    | PA2559 | 66  | 58  |
| 2894754 | 2894739 | 2894452 | 2894303 - | -    | PA2560 | 56  | 141 |

|         |         |         |   |       |          |     |     |
|---------|---------|---------|---|-------|----------|-----|-----|
|         | 2894908 | 2896614 | + | -     | PA2561   | 14  | 16  |
|         | 2897253 | 2896741 | - | -     | PA2562   | 42  | 31  |
|         | 2897610 | 2899097 | + | -     | PA2563   | 9   | 10  |
|         | 2899934 | 2899107 | - | -     | PA2564   | 8   | 7   |
|         | 2900349 | 2899924 | - | -     | PA2565   | 4   | 5   |
|         | 2901559 | 2900372 | - | -     | PA2566   | 4   | 6   |
|         | 2902218 | 2903981 | + | -     | PA2567   | 28  | 24  |
| 2904447 | 2904447 | 2904040 | - | -     | PA2568   | 40  | 31  |
|         | 2904907 | 2904566 | - | -     | PA2569   | 35  | 22  |
|         | 2905550 | 2905182 | - | leca  | PA2570   | 2   | 3   |
| 2906051 |         | 2905965 | - | -     | PA2570.1 | 164 | 150 |
|         | 2907578 | 2906166 | - | -     | PA2571   | 7   | 4   |
|         | 2907656 | 2908999 | + | -     | PA2572   | 10  | 4   |
|         | 2910617 | 2909010 | - | -     | PA2573   | 16  | 9   |
|         | 2911877 | 2910729 | - | alkB1 | PA2574   | 6   | 5   |
| 2912222 | 2912225 | 2912827 | + | -     | PA2575   | 180 | 133 |
|         | 2913789 | 2912890 | - | -     | PA2576   | 18  | 16  |
| 2913828 | 2913922 | 2914359 | + | -     | PA2577   | 62  | 30  |
| 2914360 | 2914374 | 2914934 | + | -     | PA2578   | 30  | 31  |
| 2915904 | 2915832 | 2914966 | - | kynA  | PA2579   | 199 | 283 |
|         | 2916748 | 2916158 | - | -     | PA2580   | 17  | 21  |
| 2917150 | 2917172 | 2918212 | + | -     | PA2581   | 156 | 144 |
| 2918676 |         | 2918603 | - | -     | PA2581.1 | 190 | 461 |
| 2919505 | 2919500 | 2918967 | - | -     | PA2582   | 311 | 258 |
|         | 2922569 | 2919591 | - | -     | PA2583   | 33  | 33  |
| 2923297 |         | 2923222 | - | -     | PA2583.1 | 78  | 155 |
| 2923927 | 2923927 | 2923367 | - | pgsA  | PA2584   | 124 | 179 |
|         | 2925787 | 2923961 | - | uvrC  | PA2585   | 48  | 57  |
| 2926567 | 2926432 | 2925788 | - | gacA  | PA2586   | 166 | 177 |
| 2927970 | 2927921 | 2926773 | - | pqsh  | PA2587   | 130 | 93  |
|         | 2928539 | 2929567 | + | -     | PA2588   | 38  | 23  |
|         | 2930797 | 2929583 | - | -     | PA2589   | 6   | 5   |

|         |         |         |         |      |          |     |      |
|---------|---------|---------|---------|------|----------|-----|------|
| 2934398 | 2933462 | 2933582 | -       | -    | PA2590   | 3   | 2    |
| 2934528 | 2934388 | 2933582 | 2933463 | -    | PA2591   | 81  | 74   |
|         | 2934541 | 2935644 | 2935701 | +    | PA2592   | 66  | 59   |
|         | 2935851 | 2936423 | +       | qteE | PA2593   | 13  | 10   |
|         | 2937449 | 2936490 | -       | -    | PA2594   | 15  | 12   |
|         | 2938541 | 2937585 | -       | -    | PA2595   | 9   | 7    |
|         | 2939539 | 2938553 | -       | -    | PA2596   | 4   | 5    |
|         | 2940797 | 2939646 | -       | -    | PA2597   | 5   | 3    |
|         | 2941884 | 2940802 | -       | -    | PA2598   | 7   | 7    |
|         | 2942838 | 2941894 | -       | -    | PA2599   | 9   | 6    |
|         | 2943915 | 2942848 | -       | -    | PA2600   | 6   | 4    |
|         | 2945151 | 2944255 | -       | -    | PA2601   | 19  | 11   |
|         | 2945264 | 2945869 | +       | -    | PA2602   | 12  | 6    |
|         | 2945866 | 2947449 | +       | -    | PA2603   | 21  | 18   |
| 2947672 |         |         | 2947583 | -    | PA2603.1 | 53  | 48   |
| 2947776 | 2947803 | 2948471 | 2948482 | +    | PA2604   | 344 | 262  |
| 2948576 | 2948582 | 2948977 | +       | -    | PA2605   | 76  | 53   |
|         | 2948974 | 2949333 | +       | -    | PA2606   | 69  | 48   |
|         | 2949333 | 2949638 | +       | -    | PA2607   | 55  | 53   |
|         | 2949635 | 2949970 | +       | -    | PA2608   | 60  | 51   |
|         | 2949967 | 2950950 | 2950973 | +    | PA2609   | 56  | 55   |
| 2950974 | 2951038 | 2952012 | 2952012 | +    | PA2610   | 35  | 31   |
| 2953414 | 2953414 | 2952017 | 2952013 | -    | cysG     | 129 | 139  |
| 2954696 | 2954696 | 2953416 | 2953415 | -    | sers     | 278 | 274  |
| 2956143 | 2956143 | 2954818 | 2954707 | -    | PA2613   | 116 | 137  |
| 2956779 | 2956779 | 2956153 | 2956144 | -    | lolA     | 208 | 239  |
| 2959397 | 2959240 | 2956805 | 2956780 | -    | ftsK     | 150 | 150  |
| 2959420 | 2959468 | 2960418 | 2960418 | +    | trxB1    | 425 | 320  |
| 2960419 | 2960456 | 2961136 | 2961190 | +    | aat      | 65  | 77   |
| 2961191 | 2961191 | 2961898 | 2961963 | +    | PA2618   | 35  | 37   |
| 2961967 | 2962003 | 2962221 | 2962248 | +    | infA     | 873 | 1484 |
| 2964601 | 2964579 | 2962303 | 2962293 | -    | clpA     | 252 | 255  |

|         |         |         |           |      |              |      |      |
|---------|---------|---------|-----------|------|--------------|------|------|
| 2965073 | 2964843 | 2964607 | 2964602 - | -    | PA2621       | 501  | 466  |
| 2965115 |         |         | 2965151 ? | -    | predicted RN | 270  | 204  |
| 2965152 | 2965201 | 2965473 | 2965485 + | cspD | PA2622       | 255  | 140  |
| 2966826 | 2966802 | 2965546 | 2965527 - | icd  | PA2623       | 1826 | 1192 |
| 2966954 | 2967161 | 2969386 | 2969405 + | idh  | PA2624       | 994  | 541  |
|         | 2969473 | 2969943 | +         | -    | PA2625       | 39   | 30   |
| 2969978 | 2969987 | 2971114 | +         | trmU | PA2626       | 218  | 227  |
|         | 2971111 | 2971731 | 2971733 + | -    | PA2627       | 154  | 160  |
|         | 2971734 | 2972624 | +         | -    | PA2628       | 26   | 22   |
| 2972677 | 2972699 | 2974069 | 2974070 + | purB | PA2629       | 268  | 274  |
| 2974075 | 2974129 | 2975298 | +         | -    | PA2630       | 127  | 120  |
|         | 2975291 | 2975716 | 2975716 + | -    | PA2631       | 175  | 156  |
| 2975717 | 2975723 | 2976343 | +         | -    | PA2632       | 51   | 37   |
|         | 2976340 | 2977161 | +         | -    | PA2633       | 34   | 22   |
| 2977378 | 2977756 | 2979351 | 2979351 + | aceA | PA2634       | 262  | 226  |
|         | 2979530 | 2981548 | +         | -    | PA2635       | 5    | 3    |
|         | 2981627 | 2982181 | +         | -    | PA2636       | 6    | 4    |
| 2982699 | 2982781 | 2983194 | 2983195 + | nuoA | PA2637       | 428  | 469  |
| 2983196 | 2983205 | 2983882 | 2983882 + | nuoB | PA2638       | 770  | 717  |
| 2983883 | 2983963 | 2985744 | 2985744 + | nuoD | PA2639       | 393  | 356  |
| 2985745 | 2985746 | 2986246 | +         | nuoE | PA2640       | 407  | 379  |
|         | 2986243 | 2987589 | 2987589 + | nuoF | PA2641       | 381  | 384  |
| 2987696 |         |         | 2987706 ? | -    | predicted RN | 393  | 379  |
| 2987707 | 2987721 | 2990438 | +         | nuoG | PA2642       | 388  | 374  |
|         | 2990435 | 2991430 | 2991441 + | nuoH | PA2643       | 349  | 350  |
| 2991442 | 2991442 | 2991990 | 2991991 + | nuoI | PA2644       | 347  | 378  |
| 2991995 | 2992002 | 2992502 | 2992502 + | nuoJ | PA2645       | 288  | 335  |
| 2992503 | 2992548 | 2992856 | +         | nuoK | PA2646       | 265  | 280  |
|         | 2992853 | 2994700 | 2994700 + | nuoL | PA2647       | 267  | 310  |
| 2994701 | 2994728 | 2996257 | 2996257 + | nuoM | PA2648       | 242  | 266  |
| 2996258 | 2996265 | 2997725 | 2997732 + | nuoN | PA2649       | 190  | 237  |
|         | 2997840 | 2998649 | +         | -    | PA2650       | 18   | 19   |

|         |         |         |         |   |      |        |     |     |
|---------|---------|---------|---------|---|------|--------|-----|-----|
| 2999923 | 2999914 | 2998856 | 2998844 | - | -    | PA2651 | 86  | 49  |
| 3001872 | 3001759 | 3000074 | 3000074 | - | -    | PA2652 | 88  | 56  |
| 3003231 | 3003198 | 3001873 | 3001873 | - | -    | PA2653 | 92  | 75  |
| 3003379 | 3003457 | 3005601 | 3005605 | + | -    | PA2654 | 61  | 41  |
| 3005914 | 3005914 | 3005606 | 3005606 | - | -    | PA2655 | 28  | 22  |
|         | 3007342 | 3006005 |         | - | -    | PA2656 | 24  | 27  |
|         | 3008010 | 3007339 |         | - | -    | PA2657 | 55  | 41  |
|         | 3008324 | 3008010 |         | - | -    | PA2658 | 128 | 86  |
| 3008676 | 3008632 | 3008324 |         | - | -    | PA2659 | 193 | 129 |
| 3008842 | 3008847 | 3009929 | 3009951 | + | -    | PA2660 | 60  | 50  |
| 3009956 | 3009956 | 3010849 | 3011099 | + | -    | PA2661 | 37  | 35  |
|         | 3012293 | 3011100 |         | - | -    | PA2662 | 12  | 9   |
|         | 3012537 | 3012280 |         | - | ppyR | PA2663 | 14  | 8   |
|         | 3013773 | 3012592 |         | - | fhp  | PA2664 | 4   | 2   |
|         | 3013928 | 3015481 |         | + | -    | PA2665 | 19  | 17  |
| 3015553 | 3015582 | 3015938 | 3016021 | + | -    | PA2666 | 64  | 71  |
| 3016205 | 3016246 | 3016599 | 3016604 | + | -    | PA2667 | 801 | 654 |
|         | 3016884 | 3016675 |         | - | -    | PA2668 | 51  | 40  |
|         | 3017818 | 3017234 |         | - | -    | PA2669 | 6   | 5   |
|         | 3018804 | 3017818 |         | - | -    | PA2670 | 8   | 5   |
|         | 3019927 | 3018848 |         | - | -    | PA2671 | 3   | 4   |
|         | 3020507 | 3019917 |         | - | -    | PA2672 | 2   | 1   |
|         | 3020929 | 3020504 |         | - | -    | PA2673 | 5   | 1   |
|         | 3021339 | 3020929 |         | - | -    | PA2674 | 6   | 4   |
|         | 3021742 | 3021308 |         | - | -    | PA2675 | 5   | 2   |
|         | 3022983 | 3021796 |         | - | -    | PA2676 | 3   | 2   |
|         | 3024715 | 3022988 |         | - | -    | PA2677 | 5   | 3   |
|         | 3025508 | 3024705 |         | - | -    | PA2678 | 13  | 4   |
|         | 3026852 | 3026100 |         | - | -    | PA2679 | 61  | 7   |
|         | 3027078 | 3028052 |         | + | -    | PA2680 | 5   | 4   |
|         | 3028075 | 3029004 |         | + | -    | PA2681 | 12  | 7   |
|         | 3029187 | 3030428 |         | + | -    | PA2682 | 11  | 8   |

|         |         |         |         |      |        |     |    |
|---------|---------|---------|---------|------|--------|-----|----|
| 3035751 | 3031398 | 3030436 | -       | -    | PA2683 | 25  | 22 |
|         | 3035702 | 3031749 | 3031515 | -    | PA2684 | 50  | 44 |
|         | 3037932 | 3035752 | 3035752 | -    | PA2685 | 81  | 66 |
|         | 3037886 | 3038803 | +       | pfer | PA2686 | 24  | 22 |
| 3046368 | 3038803 | 3040143 | +       | pfeS | PA2687 | 12  | 10 |
|         | 3040242 | 3042482 | +       | pfeA | PA2688 | 3   | 5  |
|         | 3042502 | 3043416 | +       | -    | PA2689 | 7   | 4  |
|         | 3044766 | 3043750 | -       | -    | PA2690 | 18  | 20 |
| 3046368 | 3046152 | 3044947 | -       | -    | PA2691 | 10  | 5  |
|         | 3046421 | 3046945 | 3047115 | -    | PA2692 | 41  | 38 |
|         | 3047116 | 3047616 | +       | -    | PA2693 | 20  | 20 |
|         | 3047970 | 3047644 | -       | -    | PA2694 | 19  | 21 |
| 3046368 | 3049154 | 3048051 | -       | -    | PA2695 | 25  | 24 |
|         | 3050161 | 3049268 | -       | -    | PA2696 | 7   | 3  |
|         | 3050612 | 3050331 | -       | -    | PA2697 | 9   | 4  |
|         | 3051349 | 3050669 | -       | -    | PA2698 | 15  | 12 |
| 3046368 | 3051957 | 3053795 | +       | -    | PA2699 | 1   | 1  |
|         | 3053844 | 3055151 | +       | opdB | PA2700 | 3   | 1  |
|         | 3055154 | 3056743 | +       | -    | PA2701 | 3   | 2  |
|         | 3056890 | 3057366 | 3057366 | -    | PA2702 | 21  | 19 |
| 3046368 | 3057376 | 3057609 | +       | -    | PA2703 | 25  | 16 |
|         | 3058921 | 3057902 | -       | -    | PA2704 | 12  | 8  |
|         | 3060264 | 3059035 | 3058924 | -    | PA2705 | 50  | 28 |
|         | 3060660 | 3060265 | -       | -    | PA2706 | 43  | 30 |
| 3061610 | 3061570 | 3060725 | 3060661 | -    | PA2707 | 121 | 66 |
|         | 3062818 | 3061733 | -       | -    | PA2708 | 5   | 4  |
|         | 3062928 | 3062939 | 3063971 | cysK | PA2709 | 102 | 53 |
|         | 3063972 | 3064586 | +       | -    | PA2710 | 39  | 29 |
| 3067686 | 3064785 | 3065876 | +       | -    | PA2711 | 9   | 7  |
|         | 3066296 | 3067159 | +       | -    | PA2712 | 15  | 42 |
|         | 3067686 | 3067207 | -       | -    | PA2713 | 34  | 28 |
|         | 3068040 | 3070349 | +       | -    | PA2714 | 7   | 9  |

|         |         |           |           |      |              |       |       |
|---------|---------|-----------|-----------|------|--------------|-------|-------|
|         | 3070366 | 3070704   | +         | -    | PA2715       | 10    | 6     |
|         | 3071954 | 3070719   | -         | -    | PA2716       | 5     | 4     |
|         | 3072911 | 3072081   | -         | cpo  | PA2717       | 6     | 2     |
|         | 3073144 | 3073632   | +         | -    | PA2718       | 25    | 13    |
|         | 3073732 | 3074418   | +         | -    | PA2719       | 7     | 6     |
| 3075276 | 3075218 | 3074580   | 3074419 - | -    | PA2720       | 49    | 46    |
|         | 3075411 | 3075890   | +         | -    | PA2721       | 3     | 3     |
|         | 3075922 | 3076314   | +         | -    | PA2722       | 4     | 3     |
|         | 3076344 | 3076622   | +         | -    | PA2723       | 37    | 21    |
|         | 3076697 | 3077236   | +         | -    | PA2724       | 5     | 5     |
| 3077259 | 3077312 | 3079195   | 3079196 + | -    | PA2725       | 43    | 33    |
| 3079197 | 3079197 | 3079835   | +         | -    | PA2726       | 25    | 19    |
| 3079850 | 3079850 | 3083482   | 3083482 + | -    | PA2727       | 22    | 18    |
|         | 3083485 | 3086145   | +         | -    | PA2728       | 19    | 14    |
|         | 3086142 | 3087491   | +         | -    | PA2729       | 14    | 10    |
| 3087767 |         | 3087988 ? | 3087988 ? | -    | predicted RN | 319   | 609   |
| 3089636 | 3089613 | 3088660   | 3088551 - | -    | PA2730       | 178   | 166   |
| 3090220 | 3090108 | 3089644   | 3089637 - | -    | PA2731       | 206   | 208   |
|         | 3093661 | 3090221   | 3090221 - | -    | PA2732       | 163   | 159   |
| 3094667 | 3094185 | 3093658   | -         | -    | PA2733       | 233   | 218   |
| 3096052 | 3096052 | 3094757   | 3094757 - | -    | PA2734       | 295   | 275   |
| 3096053 |         | 3096065 ? | 3096065 ? | -    | predicted RN | 387   | 362   |
| 3098508 | 3098508 | 3096130   | 3096117 - | -    | PA2735       | 313   | 272   |
| 3099208 | 3098979 | 3098626   | 3098514 - | -    | PA2736       | 159   | 191   |
| 3099382 |         |           | 3099306 - | -    | PA2736.1     | 182   | 419   |
| 3099733 | 3099730 | 3099473   | 3099383 - | -    | PA2737       | 484   | 366   |
| 3099734 |         |           | 3099781 ? | -    | predicted RN | 1010  | 653   |
| 3100115 | 3100112 | 3099810   | 3099782 - | himA | PA2738       | 1376  | 946   |
| 3102503 | 3102494 | 3100116   | 3100116 - | phet | PA2739       | 293   | 255   |
| 3103641 | 3103545 | 3102529   | 3102504 - | pheS | PA2740       | 393   | 350   |
| 3104015 | 3103999 | 3103643   | 3103642 - | rplT | PA2741       | 11743 | 10596 |
| 3104278 | 3104217 | 3104023   | 3104023 - | rpmI | PA2742       | 13864 | 12585 |

|         |         |         |         |   |      |              |      |      |
|---------|---------|---------|---------|---|------|--------------|------|------|
| 3106918 | 3104830 | 3104279 | 3104279 | - | infC | PA2743       | 6409 | 6355 |
| 3106994 | 3106752 | 3104830 |         | - | thrS | PA2744       | 657  | 602  |
| 3107937 |         |         | 3106919 | - | -    | PA2744.1     | 48   | 35   |
|         | 3107865 | 3107002 | 3106995 | - | -    | PA2745       | 37   | 33   |
| 3109742 | 3108057 | 3108383 | +       | - | -    | PA2746       | 13   | 8    |
|         | 3109257 | 3108970 | 3108462 | - | -    | PA2747       | 29   | 33   |
|         | 3110525 | 3109743 | -       | - | -    | PA2748       | 30   | 22   |
|         | 3110901 | 3111614 | 3111614 | + | endA | PA2749       | 29   | 30   |
| 3111615 | 3111633 | 3112151 | 3112630 | + | -    | PA2750       | 39   | 35   |
|         | 3112878 | 3113777 | +       | - | -    | PA2751       | 6    | 4    |
|         | 3114683 | 3114240 | -       | - | -    | PA2752       | 12   | 14   |
| 3114792 | 3114819 | 3115193 | 3115303 | + | -    | PA2753       | 129  | 41   |
|         | 3115304 | 3115633 | +       | - | -    | PA2754       | 54   | 40   |
| 3116647 | 3116654 | 3117124 | 3117126 | + | eco  | PA2755       | 267  | 146  |
| 3117641 | 3117611 | 3117177 | 3117169 | - | -    | PA2756       | 131  | 93   |
| 3118209 | 3118193 | 3117750 | 3117671 | - | -    | PA2757       | 61   | 47   |
|         | 3118296 | 3119183 | +       | - | -    | PA2758       | 19   | 9    |
| 3119917 | 3119708 | 3119394 | 3119322 | - | -    | PA2759       | 176  | 28   |
| 3119959 |         |         | 3121350 | + | -    | PA2760       | 1462 | 1841 |
| 3121351 | 3120073 | 3121350 | 3121366 | ? | -    | predicted RN | 437  | 614  |
| 3121396 | 3121462 | 3121878 | 3121920 | + | -    | PA2761       | 95   | 49   |
|         | 3122265 | 3121921 | -       | - | -    | PA2762       | 52   | 27   |
|         | 3122586 | 3122377 | -       | - | -    | PA2763       | 12   | 7    |
| 3123490 | 3123599 | 3124294 | 3124341 | + | -    | PA2764       | 57   | 42   |
| 3125306 | 3125241 | 3124342 | 3124342 | - | -    | PA2765       | 194  | 169  |
|         | 3126164 | 3125583 | -       | - | -    | PA2766       | 24   | 17   |
|         | 3126252 | 3127220 | +       | - | -    | PA2767       | 10   | 8    |
|         | 3127226 | 3127708 | +       | - | -    | PA2768       | 25   | 21   |
| 3128270 | 3128270 | 3127860 | 3127709 | - | -    | PA2769       | 69   | 50   |
| 3129078 | 3129071 | 3128292 | 3128271 | - | -    | PA2770       | 127  | 78   |
| 3129417 | 3129729 | 3130754 | 3130754 | + | -    | PA2771       | 42   | 45   |
| 3131508 | 3131159 | 3130761 | 3130759 | - | -    | PA2772       | 46   | 61   |

|         |         |         |         |   |      |          |     |     |
|---------|---------|---------|---------|---|------|----------|-----|-----|
| 3132228 | 3132030 | 3131509 | 3131509 | - | -    | PA2773   | 40  | 43  |
| 3132816 | 3132816 | 3132229 | 3132229 | - | -    | PA2774   | 91  | 83  |
| 3133269 | 3133258 | 3132821 | 3132817 | - | -    | PA2775   | 115 | 121 |
| 3133525 |         |         | 3133449 | - | -    | PA2775.1 | 6   | 7   |
| 3133698 | 3133710 | 3134993 | 3135043 | + | -    | PA2776   | 90  | 31  |
|         | 3136000 | 3135044 |         | - | -    | PA2777   | 14  | 13  |
|         | 3136963 | 3136082 |         | - | -    | PA2778   | 23  | 30  |
| 3137495 | 3137442 | 3137044 | 3136964 | - | -    | PA2779   | 46  | 64  |
|         | 3137850 | 3138194 |         | + | -    | PA2780   | 16  | 6   |
|         | 3138191 | 3138532 |         | + | -    | PA2781   | 22  | 10  |
|         | 3139011 | 3139670 |         | + | -    | PA2782   | 6   | 1   |
|         | 3139748 | 3141547 |         | + | -    | PA2783   | 6   | 1   |
|         | 3141719 | 3142276 |         | + | -    | PA2784   | 7   | 3   |
|         | 3142285 | 3142503 |         | + | -    | PA2785   | 8   | 4   |
|         | 3142618 | 3143085 |         | + | -    | PA2786   | 2   | 3   |
|         | 3143152 | 3144390 |         | + | cpg2 | PA2787   | 4   | 2   |
|         | 3146007 | 3144412 |         | - | -    | PA2788   | 10  | 5   |
|         | 3146251 | 3147330 |         | + | -    | PA2789   | 14  | 13  |
|         | 3147765 | 3148250 |         | + | -    | PA2790   | 27  | 16  |
|         | 3148629 | 3148339 |         | - | -    | PA2791   | 20  | 18  |
| 3149399 | 3149319 | 3148723 | 3148630 | - | -    | PA2792   | 41  | 39  |
| 3150447 | 3150434 | 3149400 | 3149400 | - | -    | PA2793   | 88  | 89  |
|         | 3152202 | 3150886 |         | - | -    | PA2794   | 16  | 11  |
| 3152490 | 3152504 | 3153502 | 3153502 | + | -    | PA2795   | 68  | 68  |
| 3153503 | 3153582 | 3154505 | 3154592 | + | tail | PA2796   | 111 | 65  |
|         | 3155075 | 3154593 | 3154593 | - | -    | PA2797   | 247 | 297 |
| 3156298 | 3156256 | 3155072 |         | - | -    | PA2798   | 319 | 417 |
| 3156319 | 3156503 | 3156802 | 3156859 | + | -    | PA2799   | 51  | 40  |
| 3157564 | 3157564 | 3156860 | 3156860 | - | -    | PA2800   | 473 | 438 |
| 3157609 | 3157667 | 3158071 | 3158071 | + | -    | PA2801   | 76  | 56  |
| 3158803 | 3158792 | 3158073 | 3158072 | - | -    | PA2802   | 84  | 69  |
|         | 3158926 | 3159669 |         | + | -    | PA2803   | 4   | 2   |

|         |         |         |   |      |          |     |      |
|---------|---------|---------|---|------|----------|-----|------|
| 3160293 | 3159666 | 3160247 | + | -    | PA2804   | 4   | 2    |
| 3160293 | 3160321 | 3160584 | + | -    | PA2805   | 248 | 117  |
| 3161535 | 3161481 | 3160651 | - | -    | PA2806   | 55  | 65   |
|         | 3162216 | 3161599 | - | -    | PA2807   | 3   | 0    |
|         | 3162579 | 3162388 | - | ptrA | PA2808   | 11  | 17   |
|         | 3162705 | 3163385 | + | copR | PA2809   | 16  | 12   |
|         | 3163382 | 3164713 | + | copS | PA2810   | 14  | 16   |
|         | 3165542 | 3164763 | - | -    | PA2811   | 86  | 80   |
| 3166471 | 3166471 | 3165539 | - | -    | PA2812   | 111 | 101  |
| 3167281 | 3167167 | 3166547 | - | -    | PA2813   | 43  | 32   |
|         | 3167953 | 3167282 | - | -    | PA2814   | 9   | 3    |
|         | 3168106 | 3170553 | + | -    | PA2815   | 15  | 8    |
|         | 3170682 | 3171062 | + | -    | PA2816   | 25  | 13   |
| 3171097 | 3171121 | 3171531 | + | -    | PA2817   | 94  | 82   |
|         | 3173175 | 3171598 | - | arr  | PA2818   | 26  | 25   |
| 3173244 | 3173244 | 3173723 | + | -    | PA2819   | 143 | 285  |
| 3173674 |         | 3173599 | - | -    | PA2819.1 | 271 | 602  |
| 3173834 |         | 3173759 | - | -    | PA2819.2 | 881 | 2122 |
| 3173912 |         | 3173837 | - | -    | PA2819.3 | 940 | 2334 |
| 3174090 | 3174131 | 3174904 | + | -    | PA2820   | 68  | 48   |
| 3174966 | 3174966 | 3175628 | + | -    | PA2821   | 66  | 50   |
|         | 3176120 | 3175638 | - | -    | PA2822   | 94  | 74   |
| 3177089 | 3177007 | 3176117 | - | -    | PA2823   | 108 | 84   |
|         | 3177090 | 3179450 | + | -    | PA2824   | 27  | 18   |
|         | 3179960 | 3179469 | - | ospR | PA2825   | 50  | 40   |
| 3180553 | 3180442 | 3179957 | - | -    | PA2826   | 60  | 37   |
| 3180978 | 3180952 | 3180554 | - | -    | PA2827   | 98  | 58   |
| 3181083 | 3181137 | 3182348 | + | -    | PA2828   | 153 | 169  |
| 3182349 | 3182400 | 3182852 | + | -    | PA2829   | 41  | 51   |
| 3182978 | 3182986 | 3183861 | + | htpX | PA2830   | 278 | 277  |
| 3183997 | 3184002 | 3185129 | + | -    | PA2831   | 75  | 40   |
| 3185834 | 3185817 | 3185161 | - | tpm  | PA2832   | 57  | 31   |

|         |         |         |   |      |          |       |       |
|---------|---------|---------|---|------|----------|-------|-------|
|         | 3186319 | 3185873 | - | -    | PA2833   | 9     | 8     |
|         | 3186449 | 3187408 | + | -    | PA2834   | 24    | 17    |
|         | 3187546 | 3189138 | + | -    | PA2835   | 2     | 1     |
|         | 3189150 | 3190214 | + | -    | PA2836   | 2     | 2     |
|         | 3190211 | 3191650 | + | -    | PA2837   | 2     | 1     |
|         | 3191687 | 3192658 | + | -    | PA2838   | 2     | 3     |
|         | 3192749 | 3193519 | + | -    | PA2839   | 6     | 7     |
| 3195746 | 3195589 | 3193886 | - | -    | PA2840   | 136   | 73    |
|         | 3195900 | 3196691 | + | -    | PA2841   | 28    | 16    |
|         | 3197466 | 3196717 | - | -    | PA2842   | 35    | 24    |
| 3197620 | 3197642 | 3198988 | + | -    | PA2843   | 49    | 38    |
|         | 3200237 | 3199029 | - | -    | PA2844   | 18    | 8     |
|         | 3200553 | 3200320 | - | -    | PA2845   | 8     | 5     |
|         | 3200650 | 3201504 | + | -    | PA2846   | 17    | 9     |
|         | 3202255 | 3201506 | - | -    | PA2847   | 18    | 7     |
|         | 3202293 | 3203312 | + | -    | PA2848   | 9     | 4     |
| 3203380 | 3203398 | 3203853 | + | ohrR | PA2849   | 77    | 55    |
| 3203997 | 3203998 | 3204426 | + | ohr  | PA2850   | 74    | 74    |
| 3205102 | 3205080 | 3204514 | - | efp  | PA2851   | 2564  | 2141  |
|         | 3206253 | 3205123 | - | -    | PA2852   | 22    | 22    |
| 3206408 |         |         | + | -    | PA2852.1 | 20    | 43    |
| 3206852 | 3206915 | 3207166 | + | oprI | PA2853   | 38225 | 36090 |
| 3208273 | 3208261 | 3207290 | - | -    | PA2854   | 259   | 246   |
| 3208617 | 3208617 | 3208339 | - | -    | PA2855   | 78    | 76    |
| 3209288 | 3209278 | 3208673 | - | tesA | PA2856   | 78    | 50    |
|         | 3209289 | 3209972 | + | -    | PA2857   | 30    | 25    |
|         | 3209981 | 3212473 | + | -    | PA2858   | 19    | 14    |
| 3212474 | 3212525 | 3213031 | + | greB | PA2859   | 55    | 57    |
| 3213484 | 3213484 | 3213044 | - | -    | PA2860   | 148   | 136   |
|         | 3213538 | 3214086 | + | ligT | PA2861   | 3     | 5     |
|         | 3214282 | 3215217 | + | lipA | PA2862   | 10    | 3     |
|         | 3215423 | 3216289 | + | lipH | PA2863   | 2     | 1     |

|         |         |         |         |      |        |        |     |     |
|---------|---------|---------|---------|------|--------|--------|-----|-----|
| 3216903 | 3216890 | 3216456 | 3216451 | -    | -      | PA2864 | 66  | 41  |
|         | 3218419 | 3216989 | -       | -    | -      | PA2865 | 33  | 25  |
| 3218420 | 3218666 | 3219469 | 3219580 | +    | mttC   | PA2866 | 26  | 27  |
| 3219581 | 3219608 | 3221080 | 3221080 | +    | -      | PA2867 | 198 | 194 |
|         | 3221206 | 3221565 | +       | +    | -      | PA2868 | 27  | 33  |
|         | 3221652 | 3222140 | +       | -    | -      | PA2869 | 14  | 10  |
|         | 3222150 | 3223727 | +       | -    | -      | PA2870 | 16  | 10  |
| 3224540 | 3224533 | 3223736 | 3223728 | -    | -      | PA2871 | 54  | 39  |
|         | 3225384 | 3224614 | -       | -    | -      | PA2872 | 23  | 14  |
|         | 3227387 | 3225381 | -       | -    | -      | PA2873 | 21  | 9   |
|         | 3228337 | 3227384 | -       | -    | -      | PA2874 | 24  | 11  |
| 3229483 | 3229254 | 3228337 | -       | -    | -      | PA2875 | 60  | 38  |
| 3230193 | 3230182 | 3229484 | 3229484 | -    | pyrF   | PA2876 | 80  | 79  |
|         | 3231172 | 3230279 | -       | -    | -      | PA2877 | 17  | 13  |
|         | 3231218 | 3231859 | +       | +    | -      | PA2878 | 10  | 11  |
|         | 3232772 | 3231882 | -       | -    | -      | PA2879 | 28  | 16  |
|         | 3232819 | 3233334 | +       | +    | -      | PA2880 | 12  | 8   |
|         | 3234254 | 3233343 | -       | -    | -      | PA2881 | 8   | 4   |
|         | 3235371 | 3234256 | -       | -    | -      | PA2882 | 4   | 2   |
| 3235787 | 3235794 | 3235961 | 3236024 | +    | -      | PA2883 | 105 | 57  |
| 3236194 | 3236194 | 3236958 | +       | -    | -      | PA2884 | 55  | 57  |
| 3237683 | 3237555 | 3236959 | -       | atuR | PA2885 | 105    | 72  | 72  |
|         | 3237836 | 3239638 | +       | +    | atuA   | PA2886 | 10  | 11  |
|         | 3239711 | 3240589 | +       | +    | atuB   | PA2887 | 8   | 14  |
|         | 3240591 | 3242207 | +       | +    | atuC   | PA2888 | 6   | 10  |
|         | 3242324 | 3243484 | +       | +    | atuD   | PA2889 | 10  | 14  |
|         | 3243505 | 3244299 | +       | +    | atuE   | PA2890 | 4   | 7   |
|         | 3244345 | 3246330 | +       | +    | atuF   | PA2891 | 5   | 7   |
|         | 3246382 | 3247206 | +       | +    | atuG   | PA2892 | 4   | 7   |
|         | 3247369 | 3249195 | +       | +    | atuH   | PA2893 | 10  | 11  |
| 3249974 | 3249631 | 3249209 | 3249196 | -    | -      | PA2894 | 53  | 44  |
|         | 3250741 | 3249977 | 3249977 | -    | -      | PA2895 | 27  | 31  |

|         |         |         |   |      |        |     |     |
|---------|---------|---------|---|------|--------|-----|-----|
| 3251650 | 3251322 | 3250738 | - | -    | PA2896 | 37  | 30  |
| 3253102 | 3253090 | 3251651 | - | -    | PA2897 | 107 | 101 |
|         | 3253680 | 3253312 | - | -    | PA2898 | 4   | 3   |
|         | 3254404 | 3253766 | - | -    | PA2899 | 24  | 17  |
|         | 3255407 | 3254598 | - | -    | PA2900 | 123 | 116 |
|         | 3255766 | 3255407 | - | -    | PA2901 | 220 | 196 |
| 3256620 | 3256611 | 3255763 | - | -    | PA2902 | 94  | 94  |
|         | 3258360 | 3256681 | - | -    | PA2903 | 50  | 56  |
|         | 3259105 | 3258353 | - | -    | PA2904 | 69  | 63  |
|         | 3259728 | 3259102 | - | -    | PA2905 | 43  | 49  |
| 3261413 | 3261185 | 3259725 | - | -    | PA2906 | 57  | 69  |
|         | 3261522 | 3262769 | + | cobl | PA2907 | 27  | 22  |
|         | 3262762 | 3263862 | + | cbid | PA2908 | 24  | 21  |
|         | 3263859 | 3264587 | + | -    | PA2909 | 16  | 12  |
|         | 3265211 | 3264642 | - | -    | PA2910 | 6   | 4   |
|         | 3265848 | 3268004 | + | -    | PA2911 | 16  | 17  |
|         | 3268057 | 3268830 | + | -    | PA2912 | 9   | 10  |
|         | 3268827 | 3269798 | + | -    | PA2913 | 7   | 6   |
|         | 3269795 | 3270826 | + | -    | PA2914 | 8   | 8   |
|         | 3271693 | 3270827 | - | -    | PA2915 | 21  | 12  |
|         | 3272406 | 3271813 | - | -    | PA2916 | 1   | 2   |
|         | 3273293 | 3272457 | - | -    | PA2917 | 12  | 18  |
|         | 3273504 | 3274277 | + | -    | PA2918 | 12  | 7   |
|         | 3274328 | 3274585 | + | -    | PA2919 | 3   | 2   |
|         | 3276234 | 3274597 | - | -    | PA2920 | 13  | 8   |
|         | 3277308 | 3276319 | - | -    | PA2921 | 23  | 16  |
|         | 3277409 | 3278578 | + | -    | PA2922 | 1   | 1   |
|         | 3278638 | 3279423 | + | hisj | PA2923 | 1   | 1   |
|         | 3279479 | 3280168 | + | hisQ | PA2924 | 1   | 1   |
|         | 3280165 | 3280878 | + | hisM | PA2925 | 5   | 4   |
|         | 3280899 | 3281666 | + | hisP | PA2926 | 5   | 3   |
|         | 3281988 | 3283319 | + | -    | PA2927 | 11  | 11  |

|         |         |         |           |      |          |      |      |
|---------|---------|---------|-----------|------|----------|------|------|
|         | 3284598 | 3283375 | -         | -    | PA2928   | 18   | 15   |
|         | 3285621 | 3285007 | -         | -    | PA2929   | 7    | 7    |
| 3285668 | 3285687 | 3286613 | 3286623 + | -    | PA2930   | 50   | 36   |
|         | 3287214 | 3286624 | 3286624 - | cifr | PA2931   | 27   | 34   |
|         | 3287340 | 3288449 | +         | morB | PA2932   | 8    | 4    |
|         | 3288515 | 3289693 | +         | -    | PA2933   | 1    | 2    |
|         | 3289715 | 3290674 | +         | cif  | PA2934   | 8    | 3    |
|         | 3291173 | 3290694 | -         | -    | PA2935   | 2    | 2    |
|         | 3291283 | 3291864 | +         | -    | PA2936   | 3    | 3    |
|         | 3291960 | 3292268 | +         | -    | PA2937   | 2    | 1    |
|         | 3293781 | 3292324 | -         | -    | PA2938   | 5    | 3    |
|         | 3294282 | 3295892 | +         | -    | PA2939   | 5    | 5    |
|         | 3297118 | 3295979 | -         | -    | PA2940   | 6    | 6    |
|         | 3297884 | 3297240 | -         | -    | PA2941   | 22   | 23   |
| 3298933 | 3298921 | 3297905 | 3297885 - | -    | PA2942   | 54   | 41   |
| 3299022 |         |         | 3299269 + | -    | PA2942.1 | 37   | 32   |
|         | 3299492 | 3300586 | 3300586 + | -    | PA2943   | 25   | 27   |
|         | 3304361 | 3300615 | -         | cobN | PA2944   | 34   | 28   |
| 3305705 | 3305564 | 3304437 | 3304362 - | -    | PA2945   | 87   | 70   |
| 3305899 | 3305919 | 3307013 | 3307084 + | -    | PA2946   | 89   | 57   |
|         | 3307085 | 3307513 | +         | -    | PA2947   | 30   | 27   |
|         | 3307510 | 3308262 | +         | cobM | PA2948   | 22   | 14   |
|         | 3308391 | 3309338 | +         | -    | PA2949   | 28   | 24   |
| 3310637 | 3310607 | 3309411 | 3309375 - | -    | PA2950   | 656  | 772  |
|         | 3311721 | 3310792 | 3310774 - | etfA | PA2951   | 1264 | 909  |
| 3312660 | 3312470 | 3311721 | -         | etfB | PA2952   | 1430 | 1075 |
| 3312736 | 3312791 | 3314446 | 3314447 + | -    | PA2953   | 307  | 257  |
|         | 3315064 | 3314495 | 3314473 - | -    | PA2954   | 41   | 36   |
|         | 3315689 | 3315057 | -         | -    | PA2955   | 45   | 47   |
| 3316799 | 3316650 | 3315754 | 3315690 - | -    | PA2956   | 70   | 66   |
| 3317460 | 3317438 | 3316800 | 3316800 - | -    | PA2957   | 231  | 281  |
|         | 3317524 | 3318657 | +         | -    | PA2958   | 34   | 28   |

|         |         |         |           |       |              |       |       |
|---------|---------|---------|-----------|-------|--------------|-------|-------|
| 3318663 |         |         | 3318859 + | rgsA  | PA2958.1     | 164   | 136   |
| 3319673 | 3319659 | 3318883 | 3318860 - | -     | PA2959       | 149   | 123   |
| 3320032 | 3320030 | 3319674 | 3319674 - | pilZ  | PA2960       | 252   | 232   |
|         | 3321050 | 3320064 | 3320040 - | holB  | PA2961       | 108   | 92    |
| 3321701 | 3321675 | 3321043 | -         | tmk   | PA2962       | 75    | 69    |
| 3322758 | 3322753 | 3321704 | 3321704 - | -     | PA2963       | 66    | 68    |
|         | 3323574 | 3322759 | 3322759 - | pabC  | PA2964       | 191   | 167   |
| 3324946 | 3324818 | 3323574 | -         | fabF1 | PA2965       | 562   | 529   |
| 3325214 | 3325183 | 3324947 | 3324947 - | acpP  | PA2966       | 11996 | 10982 |
| 3325215 |         |         | 3325254 ? | -     | predicted RN | 6204  | 6770  |
| 3326122 | 3326122 | 3325379 | 3325255 - | fabG  | PA2967       | 1481  | 1612  |
| 3327091 | 3327083 | 3326145 | 3326124 - | fabD  | PA2968       | 538   | 743   |
| 3328202 | 3328169 | 3327189 | 3327101 - | plsX  | PA2969       | 221   | 247   |
| 3328398 | 3328385 | 3328203 | 3328203 - | rpmF  | PA2970       | 6703  | 6321  |
| 3328935 | 3328935 | 3328399 | 3328399 - | -     | PA2971       | 1814  | 2661  |
| 3328936 | 3329045 | 3329623 | 3329635 + | -     | PA2972       | 47    | 46    |
|         | 3330670 | 3329690 | 3329690 - | -     | PA2973       | 238   | 270   |
|         | 3331355 | 3330663 | -         | -     | PA2974       | 153   | 160   |
| 3332304 | 3332304 | 3331348 | -         | rluC  | PA2975       | 167   | 188   |
| 3332377 | 3332881 | 3336054 | 3336060 + | rne   | PA2976       | 440   | 316   |
|         | 3337231 | 3336212 | 3336212 - | murB  | PA2977       | 122   | 122   |
|         | 3337692 | 3337228 | -         | ptpA  | PA2978       | 173   | 177   |
|         | 3338456 | 3337692 | -         | kdsB  | PA2979       | 155   | 176   |
| 3338678 | 3338641 | 3338456 | -         | -     | PA2980       | 240   | 238   |
|         | 3339677 | 3338679 | 3338679 - | lpkX  | PA2981       | 115   | 95    |
|         | 3340117 | 3339677 | -         | -     | PA2982       | 240   | 161   |
| 3340749 | 3340749 | 3340114 | -         | -     | PA2983       | 181   | 160   |
|         | 3343047 | 3340822 | -         | -     | PA2984       | 6     | 4     |
|         | 3343178 | 3343711 | +         | -     | PA2985       | 37    | 22    |
| 3345100 | 3345100 | 3343799 | 3343757 - | -     | PA2986       | 63    | 66    |
|         | 3345796 | 3345113 | 3345101 - | -     | PA2987       | 114   | 116   |
|         | 3347039 | 3345789 | -         | -     | PA2988       | 59    | 74    |

|         |         |         |         |         |   |       |              |      |      |
|---------|---------|---------|---------|---------|---|-------|--------------|------|------|
| 3348073 | 3346977 | 3348073 | 3347741 | 3348066 | + | -     | PA2989       | 41   | 45   |
| 3350267 | 3350232 | 3348838 | 3348795 | 3348795 | + | -     | PA2990       | 156  | 84   |
|         | 3350638 | 3350411 |         | 3348796 | - | sth   | PA2991       | 410  | 232  |
|         | 3351663 | 3350635 |         | 3350300 | - | -     | PA2992       | 111  | 97   |
| 3352879 | 3352879 | 3351656 |         | -       | - | -     | PA2993       | 100  | 98   |
|         | 3353498 | 3352890 |         | 3352880 | - | nqrF  | PA2994       | 224  | 214  |
|         | 3354172 | 3353498 |         |         | - | nqrE  | PA2995       | 275  | 249  |
| 3356158 | 3354954 | 3354169 |         |         | - | nqrD  | PA2996       | 303  | 273  |
| 3357554 | 3357499 | 3356162 |         |         | - | nqrC  | PA2997       | 232  | 190  |
| 3359268 | 3359167 | 3357758 |         |         | - | nqrB  | PA2998       | 302  | 259  |
| 3360718 | 3360654 | 3359269 |         |         | - | nqrA  | PA2999       | 349  | 309  |
| 3360719 |         |         |         | 3357741 | - | aroP1 | PA3000       | 124  | 103  |
| 3360800 | 3360875 | 3364321 |         | 3359269 | - |       | PA3001       | 1591 | 1475 |
| 3364322 | 3364332 | 3364961 |         | 3360731 | ? | -     | predicted RN | 848  | 885  |
| 3365746 | 3365744 | 3365007 |         | 3364321 | + | mfd   | PA3002       | 105  | 112  |
| 3366782 | 3366754 | 3365756 |         | 3364961 | + | -     | PA3003       | 127  | 134  |
| 3367681 | 3367671 | 3366970 |         | 3365000 | - | -     | PA3004       | 129  | 106  |
| 3367889 | 3367903 | 3368517 |         | 3365756 | - | nagZ  | PA3005       | 105  | 94   |
| 3368519 | 3368529 | 3369014 |         | 3366969 | - | psrA  | PA3006       | 182  | 125  |
| 3369269 | 3369269 | 3369036 |         | 3368518 | + | lexA  | PA3007       | 271  | 135  |
| 3370099 | 3369993 | 3369475 |         | 3369014 | + | -     | PA3008       | 181  | 115  |
| 3372717 | 3372706 | 3370100 |         | 3369019 | - | -     | PA3009       | 111  | 149  |
| 3373253 | 3373171 | 3372797 |         | 3369450 | - | -     | PA3010       | 137  | 103  |
| 3374459 | 3374429 | 3373254 |         | 3370100 | - | topA  | PA3011       | 299  | 243  |
| 3376767 | 3376607 | 3374460 |         | 3372734 | - | -     | PA3012       | 66   | 38   |
|         | 3377035 | 3377853 |         | 3373254 | - | foaB  | PA3013       | 251  | 169  |
|         | 3378304 | 3377870 |         | 3374460 | - | foaA  | PA3014       | 269  | 164  |
| 3378442 | 3378512 | 3378949 |         | +       | - | -     | PA3015       | 30   | 16   |
| 3379670 | 3379665 | 3378979 |         | 3378978 | + | -     | PA3016       | 20   | 22   |
| 3381742 | 3381737 | 3379815 |         | 3378979 | - | -     | PA3017       | 81   | 62   |
|         |         |         |         | -       | - | -     | PA3018       | 164  | 184  |
|         |         |         |         | 3379815 | - | -     | PA3019       | 135  | 136  |

|         |         |   |        |          |     |
|---------|---------|---|--------|----------|-----|
| 3383891 | +       | - | PA3020 | 39       | 35  |
| 3383948 | 3384334 | + | -      | PA3021   | 176 |
| 3384378 | 3384341 | - | -      | PA3022   | 81  |
| 3385184 | -       | - | -      | PA3023   | 13  |
| 3386195 | 3385287 | - | -      | PA3024   | 12  |
| 3387829 | 3386270 | - | -      | PA3025   | 11  |
| 3389430 | 3387850 | - | -      | PA3026   | 12  |
| 3391031 | 3389436 | - | -      | PA3027   | 62  |
| 3391208 | 3392239 | + | -      | PA3028   | 101 |
| 3393485 | 3392268 | - | moeA2  | PA3029   | 154 |
| 3394021 | 3393482 | - | moaB2  | PA3030   | 24  |
| 3394088 | 3394684 | + | moaA   | PA3031   | 771 |
| 3394704 | 3395037 | + | -      | PA3031.1 | 2   |
| 3395190 | 3395266 | + | -      | PA3032   | 4   |
| 3395728 | 3395325 | - | snr1   | PA3033   | 60  |
| 3397380 | 3397096 | - | -      | PA3034   | 74  |
| 3397938 | 3397381 | - | -      | PA3035   | 12  |
| 3398104 | 3398700 | + | -      | PA3036   | 11  |
| 3398717 | 3399649 | + | -      | PA3037   | 11  |
| 3399649 | 3400515 | + | -      | PA3038   | 79  |
| 3400684 | 3401949 | + | -      | PA3039   | 4   |
| 3403516 | 3402134 | - | -      | PA3040   | 85  |
| 3403712 | 3403812 | + | -      | PA3041   | 41  |
| 3404142 | 3404145 | + | -      | PA3042   | 31  |
| 3404539 | 3404862 | + | -      | PA3043   | 36  |
| 3404979 | 3406310 | + | -      | PA3044   | 6   |
| 3408546 | 3406321 | - | -      | PA3045   | 6   |
| 3409183 | 3408560 | - | -      | PA3046   | 329 |
| 3410040 | 3409953 | - | -      | PA3047   | 61  |
| 3410068 | 3410264 | + | -      | PA3048   | 74  |
| 3414318 | 3413940 | - | rmf    | PA3049   | 121 |
| 3414351 | 3414401 | + | -      | PA3050   | 140 |
| 3415730 | 3414701 | - | pyrD   |          | 144 |

|         |         |         |   |      |        |     |     |
|---------|---------|---------|---|------|--------|-----|-----|
|         | 3416067 | 3415786 | - | -    | PA3051 | 35  | 27  |
|         | 3416061 | 3417041 | + | -    | PA3052 | 53  | 32  |
|         | 3417113 | 3418120 | + | -    | PA3053 | 16  | 8   |
|         | 3418288 | 3420192 | + | -    | PA3054 | 19  | 19  |
| 3420785 | 3420785 | 3420309 | - | -    | PA3055 | 78  | 56  |
| 3421424 | 3421299 | 3420823 | - | -    | PA3056 | 53  | 37  |
|         | 3421425 | 3421655 | + | -    | PA3057 | 16  | 22  |
|         | 3423066 | 3421696 | - | pelG | PA3058 | 7   | 9   |
|         | 3424591 | 3423068 | - | pelF | PA3059 | 3   | 3   |
|         | 3425577 | 3424588 | - | pelE | PA3060 | 5   | 6   |
|         | 3426922 | 3425555 | - | pelD | PA3061 | 3   | 3   |
|         | 3427446 | 3426928 | - | pelC | PA3062 | 3   | 5   |
|         | 3431067 | 3427486 | - | pelB | PA3063 | 2   | 2   |
|         | 3433891 | 3431045 | - | pelA | PA3064 | 3   | 3   |
|         | 3435359 | 3434373 | - | -    | PA3065 | 4   | 2   |
|         | 3435944 | 3435372 | - | -    | PA3066 | 24  | 13  |
|         | 3436430 | 3435987 | - | -    | PA3067 | 16  | 19  |
| 3441616 | 3441440 | 3436578 | - | gdhB | PA3068 | 214 | 206 |
|         | 3442330 | 3441713 | - | -    | PA3069 | 10  | 6   |
| 3442724 | 3442823 | 3443803 | + | -    | PA3070 | 115 | 94  |
| 3443804 | 3443814 | 3444752 | + | -    | PA3071 | 40  | 35  |
|         | 3444749 | 3445243 | + | -    | PA3072 | 19  | 19  |
|         | 3445236 | 3446258 | + | -    | PA3073 | 18  | 18  |
|         | 3446255 | 3448015 | + | -    | PA3074 | 19  | 21  |
|         | 3448012 | 3449643 | + | -    | PA3075 | 22  | 19  |
|         | 3449697 | 3450776 | + | -    | PA3076 | 27  | 30  |
|         | 3450838 | 3451509 | + | -    | PA3077 | 25  | 24  |
|         | 3451506 | 3452801 | + | -    | PA3078 | 25  | 24  |
| 3455256 | 3455253 | 3452872 | - | -    | PA3079 | 30  | 32  |
| 3456542 | 3456363 | 3455266 | - | -    | PA3080 | 34  | 34  |
| 3457910 | 3457910 | 3456543 | - | -    | PA3081 | 78  | 33  |
| 3460056 | 3459933 | 3457969 | - | gbt  | PA3082 | 136 | 51  |

|         |         |         |           |      |          |      |      |
|---------|---------|---------|-----------|------|----------|------|------|
| 3463055 | 3463037 | 3460380 | 3460380 - | pepN | PA3083   | 141  | 114  |
| 3463888 | 3463856 | 3463056 | 3463056 - | -    | PA3084   | 113  | 102  |
| 3464152 | 3464152 | 3463889 | 3463889 - | -    | PA3085   | 155  | 152  |
|         | 3465096 | 3464236 | 3464153 - | -    | PA3086   | 54   | 49   |
|         | 3466073 | 3465093 | -         | -    | PA3087   | 57   | 59   |
| 3466981 | 3466960 | 3466073 | -         | -    | PA3088   | 114  | 90   |
|         | 3467085 | 3468050 | +         | -    | PA3089   | 7    | 2    |
|         | 3468108 | 3468965 | +         | -    | PA3090   | 18   | 11   |
|         | 3470427 | 3468988 | -         | -    | PA3091   | 54   | 15   |
|         | 3472803 | 3470764 | -         | -    | fadH1    | 16   | 8    |
| 3473015 | 3473018 | 3474136 | +         | -    | PA3093   | 56   | 50   |
|         | 3474133 | 3475170 | 3475456 + | -    | PA3094   | 44   | 32   |
| 3475533 |         |         | 3475457 - | -    | PA3094.1 | 239  | 677  |
| 3475724 |         |         | 3475648 - | -    | PA3094.2 | 1112 | 2421 |
| 3475816 |         |         | 3475741 - | -    | PA3094.3 | 826  | 2084 |
| 3476480 | 3476480 | 3475956 | -         | xcpZ | PA3095   | 24   | 19   |
|         | 3477630 | 3476482 | -         | xcpY | PA3096   | 39   | 25   |
|         | 3478628 | 3477627 | -         | xcpX | PA3097   | 31   | 23   |
|         | 3479338 | 3478625 | -         | xcpW | PA3098   | 50   | 32   |
|         | 3479724 | 3479335 | -         | xcpV | PA3099   | 45   | 28   |
| 3480241 | 3480239 | 3479721 | -         | xcpU | PA3100   | 78   | 48   |
| 3480696 | 3480692 | 3480246 | 3480242 - | xcpT | PA3101   | 175  | 104  |
|         | 3481914 | 3480697 | 3480697 - | xcps | PA3102   | 51   | 32   |
| 3483510 | 3483422 | 3481914 | -         | xcpR | PA3103   | 72   | 45   |
| 3483642 | 3483642 | 3484349 | 3484349 + | xcpP | PA3104   | 92   | 71   |
| 3484350 | 3484354 | 3486330 | 3486370 + | xcpQ | PA3105   | 76   | 78   |
|         | 3487184 | 3486417 | 3486410 - | -    | PA3106   | 169  | 195  |
| 3488392 | 3488392 | 3487181 | -         | metZ | PA3107   | 185  | 231  |
| 3490003 | 3489914 | 3488409 | 3488393 - | purF | PA3108   | 330  | 366  |
| 3490681 | 3490678 | 3490136 | 3490004 - | -    | PA3109   | 80   | 90   |
| 3491411 | 3491411 | 3490752 | 3490682 - | -    | PA3110   | 144  | 143  |
|         | 3492704 | 3491415 | 3491412 - | folC | PA3111   | 268  | 312  |

|         |         |         |           |      |          |      |      |
|---------|---------|---------|-----------|------|----------|------|------|
| 3493659 | 3493573 | 3492701 | -         | accD | PA3112   | 383  | 528  |
| 3494515 | 3494477 | 3493842 | 3493840 - | trpF | PA3113   | 166  | 117  |
| 3495430 | 3495424 | 3494567 | 3494517 - | truA | PA3114   | 96   | 70   |
| 3498316 | 3498205 | 3495446 | 3495432 - | fimV | PA3115   | 444  | 259  |
| 3499485 | 3499384 | 3498374 | 3498341 - | -    | PA3116   | 85   | 87   |
| 3500620 | 3500598 | 3499486 | 3499486 - | asd  | PA3117   | 208  | 160  |
| 3501808 | 3501750 | 3500668 | 3500634 - | leuB | PA3118   | 65   | 44   |
|         | 3502372 | 3501809 | -         | -    | PA3119   | 18   | 24   |
| 3503291 | 3503280 | 3502642 | 3502373 - | leuD | PA3120   | 57   | 42   |
|         | 3504716 | 3503292 | -         | leuC | PA3121   | 47   | 31   |
|         | 3504879 | 3505772 | +         | -    | PA3122   | 28   | 24   |
| 3506253 | 3506242 | 3505865 | 3505773 - | -    | PA3123   | 60   | 46   |
|         | 3507233 | 3506322 | -         | -    | PA3124   | 45   | 37   |
|         | 3507345 | 3508673 | +         | -    | PA3125   | 12   | 9    |
| 3509213 | 3509166 | 3508717 | 3508707 - | ibpA | PA3126   | 248  | 341  |
|         | 3509324 | 3510127 | +         | -    | PA3127   | 27   | 16   |
| 3510144 | 3510144 | 3510890 | 3510890 + | -    | PA3128   | 22   | 17   |
| 3511892 | 3511864 | 3510905 | 3510891 - | -    | PA3129   | 76   | 78   |
|         | 3512394 | 3511957 | 3511914 - | -    | PA3130   | 67   | 37   |
| 3513096 | 3513041 | 3512394 | -         | -    | PA3131   | 74   | 55   |
|         | 3514011 | 3513154 | -         | -    | PA3132   | 8    | 10   |
|         | 3514565 | 3514023 | -         | -    | PA3133   | 13   | 11   |
| 3514798 |         |         | 3514723 - | -    | PA3133.1 | 211  | 423  |
| 3514920 |         |         | 3514845 - | -    | PA3133.2 | 437  | 902  |
| 3515089 |         |         | 3515014 - | -    | PA3133.3 | 1036 | 2084 |
| 3515213 |         |         | 3515138 - | -    | PA3133.4 | 1013 | 2249 |
| 3516921 | 3516900 | 3515416 | 3515404 - | gltX | PA3134   | 391  | 327  |
|         | 3517858 | 3516938 | -         | -    | PA3135   | 21   | 15   |
|         | 3517928 | 3518995 | +         | -    | PA3136   | 5    | 6    |
|         | 3519045 | 3520544 | +         | -    | PA3137   | 14   | 12   |
| 3522597 | 3522560 | 3520548 | 3520545 - | uvrB | PA3138   | 86   | 60   |
| 3522683 | 3522748 | 3523944 | 3524011 + | -    | PA3139   | 379  | 654  |

|         |         |         |         |         |        |              |          |      |     |
|---------|---------|---------|---------|---------|--------|--------------|----------|------|-----|
| 3524012 |         |         |         | 3524087 | +      | -            | PA3139.1 | 58   | 112 |
|         | 3524490 | 3524161 | -       | -       | -      | PA3140       | 15       | 16   |     |
| 3526774 | 3526678 | 3524681 | 3524675 | -       | wbpM   | PA3141       | 262      | 230  |     |
|         | 3527734 | 3527429 | 3527150 | -       | -      | PA3142       | 118      | 84   |     |
| 3528212 | 3528212 | 3527670 | -       | -       | -      | PA3143       | 82       | 93   |     |
| 3528387 | 3528350 | 3528231 | 3528213 | -       | -      | PA3144       | 181      | 220  |     |
| 3529506 | 3529447 | 3528428 | 3528405 | -       | wbpL   | PA3145       | 242      | 320  |     |
| 3530458 | 3530458 | 3529508 | 3529508 | -       | wbpK   | PA3146       | 307      | 388  |     |
| 3531750 | 3531708 | 3530467 | 3530459 | -       | wbpJ   | PA3147       | 352      | 412  |     |
|         | 3532815 | 3531751 | 3531751 | -       | wbpI   | PA3148       | 474      | 497  |     |
| 3533933 | 3533933 | 3532812 | -       | -       | wbpH   | PA3149       | 359      | 437  |     |
| 3535215 | 3535081 | 3533948 | 3533934 | -       | wbpG   | PA3150       | 382      | 439  |     |
|         | 3535971 | 3535216 | 3535216 | -       | hisF2  | PA3151       | 351      | 380  |     |
|         | 3536579 | 3535971 | -       | hisH2   | PA3152 | 191          | 239      |      |     |
| 3539124 | 3537811 | 3536576 | -       | wzx     | PA3153 | 102          | 129      |      |     |
| 3540209 | 3539124 | 3537808 | -       | wzy     | PA3154 | 129          | 168      |      |     |
|         | 3540207 | 3539128 | 3539127 | -       | wbpE   | PA3155       | 658      | 642  |     |
| 3542729 | 3540785 | 3540210 | 3540210 | -       | wbpD   | PA3156       | 618      | 639  |     |
| 3543757 | 3542671 | 3540782 | -       | -       | -      | PA3157       | 109      | 125  |     |
| 3545185 | 3543690 | 3542740 | 3542740 | -       | wbpB   | PA3158       | 669      | 588  |     |
| 3545186 | 3545074 | 3543764 | 3543764 | -       | wbpA   | PA3159       | 924      | 771  |     |
|         |         |         | 3545228 | ?       | -      | predicted RN | 574      | 507  |     |
| 3546965 | 3546927 | 3545881 | 3545229 | -       | wzz    | PA3160       | 209      | 226  |     |
| 3547528 |         |         | 3547624 | ?       | -      | predicted RN | 317      | 190  |     |
| 3547998 | 3547973 | 3547689 | 3547625 | -       | himD   | PA3161       | 361      | 221  |     |
| 3549919 | 3549789 | 3548110 | 3548083 | -       | rpsA   | PA3162       | 9326     | 7340 |     |
| 3549920 |         |         | 3549944 | ?       | -      | predicted RN | 4356     | 4546 |     |
| 3552978 | 3550746 | 3550057 | 3549945 | -       | cmk    | PA3163       | 220      | 203  |     |
| 3554156 | 3554088 | 3552979 | 3552979 | -       | hisc2  | PA3165       | 190      | 175  |     |
|         | 3555254 | 3554157 | 3554157 | -       | pheA   | PA3166       | 260      | 224  |     |
| 3556412 | 3556339 | 3555254 | -       | serC    | PA3167 | 350          | 323      |      |     |
| 3559278 | 3559198 | 3556427 | 3556427 | -       | gyrA   | PA3168       | 507      | 410  |     |

|         |         |         |           |        |              |     |     |
|---------|---------|---------|-----------|--------|--------------|-----|-----|
| 3560515 | 3560511 | 3559435 | 3559317 - | -      | PA3169       | 128 | 106 |
| 3560605 | 3560621 | 3561955 | 3562033 + | -      | PA3170       | 91  | 73  |
| 3562034 | 3562106 | 3562804 | + ubiG    | PA3171 | 95           | 74  |     |
|         | 3562801 | 3563481 | 3563545 + | -      | PA3172       | 63  | 54  |
| 3563546 | 3563546 | 3564286 | 3564291 + | -      | PA3173       | 86  | 69  |
|         | 3564445 | 3565173 | +         | -      | PA3174       | 6   | 4   |
|         | 3565189 | 3566124 | +         | -      | PA3175       | 6   | 3   |
|         | 3566163 | 3567377 | +         | gltS   | PA3176       | 4   | 3   |
|         | 3567606 | 3568529 | +         | -      | PA3177       | 38  | 24  |
| 3569027 | 3569013 | 3568636 | 3568602 - | -      | PA3178       | 63  | 53  |
| 3570272 | 3570266 | 3569106 | 3569106 - | -      | PA3179       | 210 | 206 |
| 3570282 | 3570414 | 3570851 | 3570939 + | -      | PA3180       | 30  | 37  |
| 3571603 | 3571603 | 3570941 | 3570941 - | -      | PA3181       | 105 | 94  |
|         | 3572337 | 3571621 | 3571604 - | pgl    | PA3182       | 101 | 71  |
| 3573799 | 3573793 | 3572324 | - zwf     | PA3183 | 211          | 93  |     |
| 3573800 |         |         | 3573816 ? | -      | predicted RN | 78  | 47  |
| 3573838 | 3573980 | 3574837 | 3574845 + | -      | PA3184       | 77  | 66  |
| 3575709 | 3575697 | 3574846 | 3574846 - | -      | PA3185       | 121 | 108 |
| 3575713 |         |         | 3575854 ? | -      | predicted RN | 16  | 24  |
| 3577290 | 3577276 | 3575912 | 3575886 - | oprB   | PA3186       | 39  | 199 |
| 3578512 | 3578480 | 3577320 | 3577297 - | -      | PA3187       | 14  | 12  |
|         | 3579358 | 3578513 | 3578513 - | -      | PA3188       | 11  | 8   |
| 3580383 | 3580283 | 3579351 | -         | -      | PA3189       | 9   | 5   |
| 3581665 | 3581646 | 3580384 | 3580384 - | -      | PA3190       | 27  | 30  |
| 3583615 | 3583592 | 3582171 | 3581666 - | -      | PA3191       | 21  | 30  |
| 3584344 | 3584344 | 3583616 | 3583616 - | gltR   | PA3192       | 70  | 74  |
| 3585476 | 3585374 | 3584379 | 3584345 - | glk    | PA3193       | 83  | 84  |
| 3587371 | 3587303 | 3585477 | 3585477 - | edd    | PA3194       | 99  | 47  |
| 3587420 | 3587433 | 3588437 | 3588437 + | gapA   | PA3195       | 120 | 103 |
| 3589271 | 3589271 | 3588741 | 3588438 - | -      | PA3196       | 54  | 62  |
| 3590356 | 3590350 | 3589352 | 3589272 - | -      | PA3197       | 48  | 44  |
| 3591363 | 3591242 | 3590490 | 3590382 - | -      | PA3198       | 37  | 37  |

|         |         |         |           |       |        |     |     |
|---------|---------|---------|-----------|-------|--------|-----|-----|
| 3593092 | 3592044 | 3591415 | 3591415 - | -     | PA3199 | 66  | 49  |
| 3593132 | 3592928 | 3592041 | -         | -     | PA3200 | 53  | 44  |
| 3593733 | 3593144 | 3593731 | 3593732 + | -     | PA3201 | 269 | 217 |
| 3594098 | 3593733 | 3594032 | 3594032 + | -     | PA3202 | 224 | 201 |
| 3594581 | 3594208 | 3594570 | 3594580 + | -     | PA3203 | 149 | 135 |
| 3595387 | 3594581 | 3595258 | 3595386 + | -     | PA3204 | 64  | 58  |
| 3597280 | 3595387 | 3595827 | 3595862 + | -     | PA3205 | 33  | 77  |
| 3598344 | 3595942 | 3597279 | +         | -     | PA3206 | 19  | 16  |
| 3598807 | 3597319 | 3597798 | +         | -     | PA3207 | 57  | 45  |
| 3598915 | 3598339 | 3597779 | -         | -     | PA3208 | 92  | 77  |
| 3600454 | 3598775 | 3598404 | 3598345 - | -     | PA3209 | 32  | 51  |
| 3602391 | 3598933 | 3600387 | 3600453 + | trkH  | PA3210 | 45  | 39  |
| 3603327 | 3600454 | 3601599 | +         | -     | PA3211 | 96  | 72  |
| 3605062 | 3601596 | 3602390 | 3602390 + | -     | PA3212 | 50  | 53  |
| 3605605 | 3602392 | 3603330 | +         | -     | PA3213 | 59  | 52  |
|         | 3603327 | 3603971 | 3603993 + | -     | PA3214 | 71  | 63  |
|         | 3605007 | 3603994 | 3603994 - | -     | PA3215 | 51  | 48  |
|         | 3605150 | 3605467 | +         | -     | PA3216 | 12  | 8   |
|         | 3605684 | 3607075 | 3607244 + | cyab  | PA3217 | 32  | 35  |
|         | 3607617 | 3608090 | +         | -     | PA3218 | 2   | 1   |
|         | 3608929 | 3608117 | -         | -     | PA3219 | 2   | 1   |
|         | 3609076 | 3609840 | +         | -     | PA3220 | 36  | 25  |
|         | 3609899 | 3610240 | 3610243 + | csaA  | PA3221 | 41  | 303 |
|         | 3610244 | 3610250 | 3611253 + | -     | PA3222 | 14  | 158 |
|         |         | 3611895 | 3611254 - | azoR3 | PA3223 | 10  | 50  |
|         | 3612543 | 3612359 | 3612042   | -     | PA3224 | 130 | 109 |
|         | 3612544 | 3612559 | 3613488   | -     | PA3225 | 54  | 54  |
|         | 3613495 | 3613495 | 3614322   | +     | PA3226 | 48  | 51  |
|         | 3614928 | 3614304 | 3614867   | ppiA  | PA3227 | 169 | 158 |
|         |         | 3614930 | 3616762   | -     | PA3228 | 58  | 77  |
|         | 3617044 | 3617310 | +         | -     | PA3229 | 11  | 9   |
|         | 3618467 | 3617343 | 3617343 - | -     | PA3230 | 29  | 25  |

|         |         |         |         |             |             |        |     |
|---------|---------|---------|---------|-------------|-------------|--------|-----|
| 3625172 | 3618884 | 3618726 | -       | -           | PA3231      | 9      | 4   |
|         | 3619619 | 3618993 | -       | -           | PA3232      | 10     | 6   |
|         | 3621415 | 3619616 | -       | -           | PA3233      | 12     | 5   |
|         | 3623160 | 3621505 | -       | -           | PA3234      | 33     | 8   |
|         | 3623468 | 3623157 | -       | -           | PA3235      | 89     | 13  |
| 3630616 | 3624543 | 3623686 | -       | -           | PA3236      | 9      | 4   |
|         | 3624837 | 3625058 | +       | -           | PA3237      | 6      | 2   |
|         | 3625201 | 3626562 | 3626565 | +           | PA3238      | 50     | 28  |
|         | 3626566 | 3627369 | +       | -           | PA3239      | 43     | 28  |
|         | 3627509 | 3628366 | +       | -           | PA3240      | 27     | 14  |
| 3630763 | 3629599 | 3628430 | -       | -           | PA3241      | 36     | 30  |
|         | 3630605 | 3629667 | 3629600 | -           | PA3242      | 52     | 59  |
|         | 3630765 | 3631556 | 3631606 | +           | minC PA3243 | 161    | 96  |
|         | 3631617 | 3632433 | +       | mind PA3244 | 781         | 678    |     |
|         | 3632430 | 3632684 | 3632684 | +           | mine PA3245 | 932    | 749 |
| 3633532 | 3632788 | 3633423 | 3633435 | +           | rluA PA3246 | 62     | 66  |
|         | 3633592 | 3634881 | 3634881 | +           | PA3247      | 101    | 85  |
|         | 3635475 | 3634924 | 3634882 | -           | PA3248      | 46     | 28  |
|         | 3636257 | 3635541 | -       | -           | PA3249      | 7      | 5   |
|         | 3636621 | 3637679 | +       | -           | PA3250      | 6      | 2   |
| 3642870 | 3637734 | 3638543 | +       | -           | PA3251      | 1      | 2   |
|         | 3638540 | 3639379 | +       | -           | PA3252      | 4      | 2   |
|         | 3639366 | 3640163 | +       | -           | PA3253      | 4      | 2   |
|         | 3640166 | 3641161 | 3641161 | +           | PA3254      | 17     | 14  |
|         | 3641162 | 3641233 | 3641811 | 3641871     | +           | PA3255 | 108 |
| 3647404 | 3642834 | 3641872 | 3641872 | -           | PA3256      | 71     | 42  |
|         | 3642964 | 3645060 | 3645071 | +           | prc PA3257  | 228    | 139 |
|         | 3645099 | 3646904 | +       | -           | PA3258      | 13     | 11  |
|         | 3647397 | 3646918 | 3646905 | -           | PA3259      | 51     | 34  |
|         | 3648114 | 3648066 | 3647755 | 3647578     | -           | PA3260 | 92  |
| 3650497 | 3648170 | 3648916 | +       | -           | PA3261      | 36     | 29  |
|         | 3650466 | 3649705 | 3649692 | -           | PA3262      | 689    | 554 |

|         |         |         |         |   |      |          |      |      |
|---------|---------|---------|---------|---|------|----------|------|------|
| 3650798 |         |         | 3650722 | - | -    | PA3262.1 | 557  | 1354 |
| 3650890 |         |         | 3650815 | - | -    | PA3262.2 | 665  | 1874 |
| 3651046 | 3651056 | 3651976 | 3651976 | + | -    | PA3263   | 146  | 94   |
|         | 3652063 | 3652998 |         | + | -    | PA3264   | 29   | 22   |
|         | 3653138 | 3653452 |         | + | -    | PA3265   | 23   | 27   |
| 3653526 | 3653667 | 3653876 | 3653897 | + | capB | PA3266   | 4332 | 2606 |
| 3655985 | 3655811 | 3653937 | 3653926 | - | -    | PA3267   | 68   | 64   |
| 3658160 | 3658151 | 3655986 | 3655986 | - | -    | PA3268   | 96   | 92   |
| 3659102 | 3659102 | 3658248 | 3658248 | - | -    | PA3269   | 36   | 20   |
| 3659846 | 3659756 | 3659169 | 3659103 | - | -    | PA3270   | 140  | 82   |
|         | 3660022 | 3663501 |         | + | -    | PA3271   | 54   | 8    |
|         | 3667855 | 3663509 |         | - | -    | PA3272   | 12   | 9    |
|         | 3668523 | 3667924 |         | - | -    | PA3273   | 9    | 1    |
|         | 3668474 | 3668761 |         | + | -    | PA3274   | 17   | 7    |
|         | 3669169 | 3668840 |         | - | -    | PA3275   | 9    | 7    |
|         | 3669588 | 3669166 |         | - | -    | PA3276   | 29   | 25   |
|         | 3670633 | 3669821 |         | - | -    | PA3277   | 22   | 12   |
|         | 3671058 | 3670759 |         | - | -    | PA3278   | 98   | 43   |
|         | 3672549 | 3671227 |         | - | oprP | PA3279   | 2    | 1    |
|         | 3674324 | 3673008 |         | - | oprO | PA3280   | 5    | 3    |
|         | 3675160 | 3674570 |         | - | -    | PA3281   | 10   | 8    |
|         | 3675897 | 3675163 |         | - | -    | PA3282   | 9    | 6    |
|         | 3676748 | 3675894 |         | - | -    | PA3283   | 20   | 14   |
| 3677114 | 3677081 | 3676767 | 3676749 | - | -    | PA3284   | 84   | 40   |
| 3678333 | 3678331 | 3677720 | 3677475 | - | -    | PA3285   | 110  | 95   |
| 3679528 | 3679386 | 3678334 | 3678334 | - | -    | PA3286   | 175  | 165  |
|         | 3679946 | 3680461 |         | + | -    | PA3287   | 19   | 15   |
| 3680968 | 3680968 | 3680465 | 3680462 | - | -    | PA3288   | 39   | 41   |
|         | 3681048 | 3681461 |         | + | -    | PA3289   | 14   | 12   |
|         | 3684148 | 3681500 | 3681500 | - | -    | PA3290   | 24   | 22   |
|         | 3684717 | 3684163 |         | - | -    | PA3291   | 12   | 9    |
|         | 3685762 | 3684905 |         | - | -    | PA3292   | 8    | 9    |

|         |         |         |         |       |          |        |      |      |
|---------|---------|---------|---------|-------|----------|--------|------|------|
| 3689327 | 368574  | 3685759 | -       | -     | PA3293   | 10     | 10   |      |
|         | 368650  | 3686584 | -       | -     | PA3294   | 18     | 17   |      |
|         | 3689316 | 3688879 | 3688762 | -     | PA3295   | 203    | 111  |      |
|         | 3689521 | 3690951 | +       | phoA  | PA3296   | 4      | 3    |      |
| 3695061 | 3695004 | 3691024 | 3691009 | -     | PA3297   | 72     | 64   |      |
|         | 3695481 | 3695179 | -       | -     | PA3298   | 6      | 6    |      |
| 3697412 | 3697199 | 3695511 | 3695511 | -     | fadD1    | 293    | 199  |      |
|         | 3699122 | 3697434 | -       | fadD2 | PA3300   | 27     | 31   |      |
| 3699351 | 3699369 | 3700319 | +       | -     | PA3301   | 80     | 62   |      |
|         | 3700316 | 3700786 | 3700789 | +     | -        | PA3302 | 217  | 144  |
| 3703156 | 3700937 | 3702112 | +       | -     | PA3303   | 9      | 9    |      |
|         | 3702950 | 3702093 | -       | -     | PA3304   | 19     | 26   |      |
|         |         |         | 3703022 | -     | PA3304.1 | 20     | 15   |      |
|         | 3705161 | 3703167 | -       | -     | PA3305   | 30     | 22   |      |
| 3705521 |         | 3705309 | -       | phrS  | PA3305.1 | 3207   | 2084 |      |
| 3706545 | 3706492 | 3705890 | 3705522 | -     | PA3306   | 41     | 31   |      |
|         | 3706854 | 3706546 | -       | -     | PA3307   | 34     | 14   |      |
| 3707090 | 3707090 | 3709942 | 3709959 | +     | hepA     | PA3308 | 188  |      |
| 3710188 | 3710225 | 3710680 | 3710691 | +     | -        | PA3309 | 978  | 1120 |
|         | 3712404 | 3710749 | 3710723 | -     | -        | PA3310 | 44   | 52   |
| 3712502 | 3712560 | 3714911 | +       | -     | PA3311   | 9      | 7    |      |
|         | 3715805 | 3714915 | -       | -     | PA3312   | 33     | 27   |      |
|         | 3715804 | 3716811 | +       | -     | PA3313   | 161    | 143  |      |
|         | 3716808 | 3717611 | +       | -     | PA3314   | 78     | 62   |      |
| 3717605 | 3717605 | 3718438 | +       | -     | PA3315   | 28     | 32   |      |
|         | 3718435 | 3719205 | +       | -     | PA3316   | 31     | 31   |      |
| 3719329 | 3719329 | 3720057 | +       | -     | PA3317   | 43     | 31   |      |
|         | 3720123 | 3720623 | +       | -     | PA3318   | 6      | 3    |      |
| 3722759 | 3722759 | 3720681 | -       | plcN  | PA3319   | 3      | 3    |      |
|         | 3723445 | 3722990 | -       | -     | PA3320   | 4      | 1    |      |
| 3723534 | 3723534 | 3724448 | +       | -     | PA3321   | 17     | 17   |      |
|         | 3725154 | 3724456 | 3724449 | -     | PA3322   | 53     | 43   |      |

|         |         |         |         |      |        |     |     |
|---------|---------|---------|---------|------|--------|-----|-----|
|         | 3725580 | 3726455 | +       | -    | PA3323 | 7   | 6   |
|         | 3726452 | 3728230 | +       | -    | PA3324 | 5   | 5   |
|         | 3728240 | 3729127 | +       | -    | PA3325 | 15  | 8   |
| 3730269 | 3730076 | 3729471 | 3729441 | -    | PA3326 | 161 | 43  |
|         | 3730557 | 3737615 | +       | -    | PA3327 | 9   | 1   |
|         | 3737612 | 3738778 | +       | -    | PA3328 | 9   | 1   |
|         | 3738775 | 3740103 | 3740103 | +    | PA3329 | 8   | 3   |
|         | 3740105 | 3741019 | +       | -    | PA3330 | 9   | 2   |
|         | 3741012 | 3742268 | +       | -    | PA3331 | 12  | 2   |
|         | 3742265 | 3742690 | 3742690 | +    | PA3332 | 14  | 2   |
|         | 3742694 | 3743686 | 3743686 | +    | fabH2  | 11  | 2   |
|         | 3743700 | 3743939 | +       | -    | PA3334 | 20  | 1   |
| 3744057 | 3744057 | 3744809 | 3744809 | +    | PA3335 | 9   | 2   |
|         | 3744901 | 3746067 | +       | -    | PA3336 | 11  | 7   |
| 3747076 | 3747076 | 3746078 | 3746078 | -    | rfad   | 85  | 46  |
|         | 3747456 | 3747166 | -       | -    | PA3338 | 31  | 17  |
|         | 3747525 | 3749711 | +       | plpD | PA3339 | 24  | 24  |
| 3752021 | 3751767 | 3749719 | 3749712 | -    | PA3340 | 30  | 28  |
| 3752509 | 3752478 | 3752044 | 3752037 | -    | PA3341 | 194 | 93  |
|         | 3753612 | 3752596 | -       | -    | PA3342 | 14  | 8   |
|         | 3754932 | 3753763 | -       | -    | PA3343 | 35  | 18  |
| 3757159 | 3757159 | 3755021 | 3754933 | -    | recQ   | 162 | 159 |
| 3757620 | 3757593 | 3757243 | 3757201 | -    | PA3345 | 116 | 139 |
| 3759374 | 3759374 | 3757659 | -       | -    | PA3346 | 26  | 15  |
| 3759712 | 3759681 | 3759376 | 3759375 | -    | PA3347 | 150 | 74  |
| 3760896 | 3760820 | 3759996 | 3759996 | -    | PA3348 | 192 | 167 |
| 3761960 | 3761829 | 3760897 | 3760897 | -    | PA3349 | 386 | 337 |
| 3761961 | 3761961 | 3762659 | 3762787 | +    | PA3350 | 115 | 74  |
| 3762794 | 3762804 | 3763127 | 3763181 | +    | flgM   | 773 | 535 |
| 3763182 | 3763182 | 3763652 | 3763652 | +    | PA3352 | 322 | 260 |
| 3763653 | 3763681 | 3764472 | 3764475 | +    | PA3353 | 141 | 119 |
|         | 3765087 | 3764476 | -       | -    | PA3354 | 31  | 28  |

|         |         |         |         |      |          |        |     |    |
|---------|---------|---------|---------|------|----------|--------|-----|----|
| 3767966 | 3766433 | 3765129 | -       | -    | PA3355   | 25     | 11  |    |
|         | 3767858 | 3766617 | 3766596 | -    | PA3356   | 135    | 75  |    |
|         | 3768184 | 3769530 | 3769586 | +    | dsdA     | 43     | 31  |    |
|         | 3769587 | 3770465 | +       | -    | PA3358   | 14     | 14  |    |
|         | 3771480 | 3770470 | -       | -    | PA3359   | 14     | 17  |    |
|         | 3772561 | 3771503 | -       | -    | PA3360   | 5      | 14  |    |
|         | 3773029 | 3773376 | +       | lecB | PA3361   | 6      | 6   |    |
|         | 3773948 | 3773430 | -       | -    | PA3362   | 7      | 14  |    |
|         | 3774581 | 3773991 | 3773949 | -    | amiR     | PA3363 | 14  | 46 |
|         | 3775735 | 3774578 | -       | amiC | PA3364   | 13     | 50  |    |
| 3776958 | 3776876 | 3775761 | 3775748 | -    | PA3365   | 11     | 80  |    |
| 3778033 | 3777999 | 3776959 | -       | amiE | PA3366   | 38     | 147 |    |
| 3778133 |         | 3778034 | -       | amiL | PA3366.1 | 40     | 132 |    |
| 3778730 | 3778266 | 3778604 | +       | -    | PA3367   | 34     | 36  |    |
|         |         |         | 3778654 | -    | PA3368.1 | 31     | 55  |    |
|         | 3778704 | 3779369 | +       | -    | PA3368   | 6      | 7   |    |
|         | 3779562 | 3779840 | +       | -    | PA3369   | 28     | 21  |    |
|         | 3779930 | 3780076 | +       | -    | PA3370   | 25     | 22  |    |
|         | 3780128 | 3780313 | +       | -    | PA3371   | 10     | 20  |    |
|         | 3781132 | 3780362 | -       | -    | PA3372   | 20     | 16  |    |
|         | 3781680 | 3781123 | -       | -    | PA3373   | 36     | 34  |    |
|         | 3782843 | 3781680 | -       | -    | PA3374   | 9      | 8   |    |
|         | 3783549 | 3782833 | -       | -    | PA3375   | 1      | 3   |    |
| 3785295 | 3784414 | 3783599 | -       | -    | PA3376   | 3      | 1   |    |
|         | 3785295 | 3784411 | -       | -    | PA3377   | 2      | 1   |    |
|         | 3786392 | 3785292 | -       | -    | PA3378   | 2      | 1   |    |
|         | 3787021 | 3786392 | -       | -    | PA3379   | 2      | 0   |    |
|         | 3787479 | 3787021 | -       | -    | PA3380   | 0      | 0   |    |
|         | 3788211 | 3787489 | -       | -    | PA3381   | 0      | 2   |    |
|         | 3789026 | 3788232 | -       | phnE | PA3382   | 0      | 1   |    |
|         | 3790097 | 3789093 | -       | -    | PA3383   | 3      | 2   |    |
|         | 3790986 | 3790150 | -       | phnC | PA3384   | 4      | 1   |    |

|         |         |         |         |   |       |        |      |     |
|---------|---------|---------|---------|---|-------|--------|------|-----|
| 3791245 | 3791347 | 3791673 | 3791739 | + | amrZ  | PA3385 | 1392 | 564 |
|         | 3791827 | 3792192 | +       | + | -     | PA3386 | 43   | 20  |
|         | 3792290 | 3793060 | +       | + | rhIG  | PA3387 | 9    | 4   |
|         | 3793113 | 3793808 | +       | + | -     | PA3388 | 29   | 21  |
|         | 3794117 | 3793815 | -       | - | -     | PA3390 | 16   | 7   |
|         | 3794178 | 3794591 | +       | + | -     | PA3389 | 5    | 4   |
|         | 3794819 | 3796966 | +       | + | nosR  | PA3391 | 2    | 1   |
|         | 3797009 | 3798919 | +       | + | nosZ  | PA3392 | 3    | 1   |
|         | 3798916 | 3800202 | +       | + | nosD  | PA3393 | 3    | 2   |
|         | 3800199 | 3801113 | +       | + | nosF  | PA3394 | 3    | 1   |
|         | 3801104 | 3801931 | +       | + | nosY  | PA3395 | 3    | 3   |
|         | 3801948 | 3802484 | +       | + | nosL  | PA3396 | 7    | 10  |
| 3803376 | 3803343 | 3802567 | 3802547 | - | fpr   | PA3397 | 401  | 408 |
| 3803377 | 3803617 | 3804543 | 3804543 | + | -     | PA3398 | 44   | 38  |
| 3804889 | 3804886 | 3804545 | 3804544 | - | -     | PA3399 | 47   | 39  |
|         | 3806073 | 3804940 | -       | - | -     | PA3400 | 17   | 16  |
| 3807242 | 3807242 | 3806070 | -       | - | -     | PA3401 | 16   | 13  |
| 3808287 | 3808217 | 3807246 | 3807243 | - | -     | PA3402 | 44   | 36  |
| 3808874 | 3808803 | 3808318 | 3808318 | - | -     | PA3403 | 29   | 43  |
|         | 3810613 | 3809258 | -       | - | -     | PA3404 | 2    | 1   |
|         | 3811941 | 3810610 | -       | - | hasE  | PA3405 | 1    | 0   |
|         | 3813740 | 3811938 | -       | - | hasD  | PA3406 | 0    | 0   |
|         | 3814575 | 3813958 | -       | - | hasAp | PA3407 | 14   | 12  |
|         | 3817336 | 3814661 | -       | - | hasR  | PA3408 | 4    | 2   |
|         | 3818532 | 3817546 | -       | - | -     | PA3409 | 5    | 5   |
|         | 3819112 | 3818597 | -       | - | -     | PA3410 | 13   | 13  |
|         | 3819407 | 3819189 | -       | - | -     | PA3411 | 7    | 10  |
|         | 3819796 | 3819527 | -       | - | -     | PA3412 | 4    | 2   |
| 3819970 | 3820006 | 3820272 | 3820307 | + | -     | PA3413 | 208  | 71  |
| 3820308 | 3820308 | 3820892 | +       | + | -     | PA3414 | 47   | 24  |
|         | 3822497 | 3821385 | -       | - | -     | PA3415 | 6    | 3   |
|         | 3823516 | 3822515 | -       | - | -     | PA3416 | 2    | 0   |

|         |         |         |         |     |        |     |     |
|---------|---------|---------|---------|-----|--------|-----|-----|
|         | 3824606 | 3823509 | -       | -   | PA3417 | 1   | 1   |
|         | 3825773 | 3824748 | -       | ldh | PA3418 | 4   | 3   |
|         | 3826019 | 3826831 | +       | -   | PA3419 | 20  | 8   |
|         | 3829321 | 3826838 | -       | -   | PA3420 | 1   | 1   |
|         | 3830841 | 3829471 | -       | -   | PA3421 | 3   | 1   |
|         | 3832655 | 3830898 | -       | -   | PA3422 | 3   | 2   |
|         | 3832940 | 3833683 | +       | -   | PA3423 | 35  | 22  |
|         | 3833774 | 3835180 | +       | -   | PA3424 | 5   | 4   |
|         | 3835215 | 3835559 | +       | -   | PA3425 | 8   | 11  |
|         | 3836349 | 3835579 | -       | -   | PA3426 | 11  | 10  |
|         | 3837377 | 3836466 | -       | -   | PA3427 | 22  | 10  |
|         | 3837786 | 3837493 | -       | -   | PA3428 | 4   | 2   |
|         | 3838781 | 3837885 | -       | -   | PA3429 | 5   | 5   |
|         | 3839557 | 3838778 | -       | -   | PA3430 | 8   | 8   |
|         | 3840372 | 3839686 | 3839558 | -   | PA3431 | 23  | 21  |
| 3840763 | 3840748 | 3840359 | -       | -   | PA3432 | 48  | 45  |
|         | 3840844 | 3841737 | +       | -   | PA3433 | 20  | 14  |
|         | 3843290 | 3842274 | -       | -   | PA3434 | 20  | 20  |
| 3844109 | 3844105 | 3843653 | 3843474 | -   | PA3435 | 220 | 155 |
|         | 3844385 | 3844942 | +       | -   | PA3436 | 8   | 24  |
| 3845025 | 3845053 | 3845757 | 3845774 | +   | folM   | 55  | 30  |
| 3845775 | 3845775 | 3846335 | 3846335 | +   | folE1  | 94  | 59  |
| 3846336 | 3846337 | 3846708 | 3846798 | +   | folX   | 129 | 71  |
| 3846808 | 3846837 | 3847148 | 3847361 | +   | PA3440 | 353 | 310 |
| 3847973 | 3847933 | 3847718 | 3847510 | -   | PA3441 | 87  | 88  |
|         | 3848798 | 3847974 | -       | -   | PA3442 | 15  | 16  |
|         | 3849583 | 3848795 | -       | -   | PA3443 | 5   | 0   |
|         | 3850752 | 3849604 | -       | -   | PA3444 | 1   | 0   |
|         | 3851801 | 3850830 | -       | -   | PA3445 | 3   | 1   |
| 3852555 | 3852513 | 3851920 | 3851907 | -   | PA3446 | 10  | 5   |
|         | 3853416 | 3852667 | -       | -   | PA3447 | 2   | 1   |
|         | 3854237 | 3853413 | -       | -   | PA3448 | 2   | 1   |

|         |         |         |         |      |        |     |     |
|---------|---------|---------|---------|------|--------|-----|-----|
| 3856145 | 3855242 | 3854241 | -       | -    | PA3449 | 1   | 0   |
|         | 3856131 | 3855493 | 3855395 | -    | PA3450 | 26  | 21  |
|         | 3856337 | 3855546 | +       | -    | PA3451 | 13  | 6   |
| 3856709 | 3856749 | 3858320 | 3858320 | +    | mqoA   | 578 | 201 |
| 3859214 | 3859209 | 3858544 | 3858321 | -    | PA3453 | 76  | 71  |
|         | 3860522 | 3859338 | -       | -    | PA3454 | 10  | 7   |
|         | 3862165 | 3860675 | -       | -    | PA3455 | 43  | 19  |
|         | 3862309 | 3864273 | +       | -    | PA3456 | 31  | 28  |
|         | 3864374 | 3865126 | +       | -    | PA3457 | 21  | 26  |
|         | 3865754 | 3865281 | -       | -    | PA3458 | 57  | 50  |
| 3865897 | 3865897 | 3867666 | +       | -    | PA3459 | 29  | 13  |
|         | 3867707 | 3869464 | +       | -    | PA3460 | 8   | 6   |
|         | 3869461 | 3870657 | +       | -    | PA3461 | 8   | 7   |
|         | 3870795 | 3873554 | +       | -    | PA3462 | 4   | 4   |
| 3873601 | 3873606 | 3873836 | 3873934 | +    | PA3463 | 33  | 36  |
|         | 3875979 | 3874654 | -       | -    | PA3464 | 7   | 6   |
|         | 3876196 | 3877911 | 3877911 | +    | PA3465 | 55  | 37  |
| 3879376 | 3879373 | 3878033 | 3877912 | -    | PA3466 | 89  | 72  |
|         | 3879559 | 3880926 | +       | -    | PA3467 | 3   | 2   |
| 3881020 | 3881093 | 3882421 | 3882440 | +    | PA3468 | 61  | 36  |
| 3882441 | 3882441 | 3882983 | +       | -    | PA3469 | 69  | 46  |
|         | 3882980 | 3883438 | 3883559 | +    | PA3470 | 61  | 35  |
| 3885270 | 3885254 | 3883560 | 3883560 | -    | PA3471 | 141 | 61  |
| 3885438 | 3885711 | 3886307 | 3886327 | +    | PA3472 | 59  | 60  |
|         | 3887227 | 3886328 | 3886328 | -    | PA3473 | 38  | 20  |
|         | 3888084 | 3887224 | -       | -    | PA3474 | 26  | 26  |
|         | 3888984 | 3888178 | -       | pheC | PA3475 | 33  | 26  |
| 3889816 | 3889744 | 3889139 | 3889112 | -    | rhII   | 250 | 170 |
| 3890659 | 3890650 | 3889925 | 3889914 | -    | rhIR   | 243 | 118 |
|         | 3892055 | 3890775 | -       | rhIB | PA3478 | 12  | 4   |
|         | 3893008 | 3892121 | 3892121 | -    | rhIA   | 19  | 4   |
| 3893998 | 3893998 | 3893432 | 3893412 | -    | PA3480 | 273 | 273 |

|         |         |         |         |      |             |     |     |
|---------|---------|---------|---------|------|-------------|-----|-----|
| 3895205 | 3895193 | 3894099 | 3893999 | -    | PA3481      | 141 | 93  |
| 3895309 | 3895324 | 3897357 | 3897390 | +    | metG PA3482 | 281 | 199 |
| 3897391 | 3897391 | 3898191 | 3898192 | +    | PA3483      | 108 | 93  |
| 3898193 | 3898278 | 3899504 | +       | -    | PA3484      | 47  | 36  |
|         | 3899501 | 3899938 | 3900232 | +    | PA3485      | 36  | 27  |
|         | 3900233 | 3902659 | +       | -    | PA3486      | 20  | 17  |
|         | 3902663 | 3905962 | +       | pIdA | PA3487      | 25  | 19  |
| 3906391 | 3906391 | 3907089 | +       | -    | PA3488      | 19  | 13  |
| 3907184 | 3907268 | 3907852 | +       | -    | PA3489      | 49  | 48  |
|         | 3907849 | 3908415 | +       | -    | PA3490      | 47  | 34  |
|         | 3908412 | 3910736 | 3910738 | +    | PA3491      | 44  | 38  |
|         | 3910739 | 3911773 | +       | -    | PA3492      | 30  | 20  |
|         | 3911773 | 3912417 | +       | -    | PA3493      | 34  | 25  |
|         | 3912410 | 3913132 | +       | -    | PA3494      | 34  | 24  |
|         | 3913129 | 3913767 | 3913872 | +    | PA3495      | 58  | 62  |
| 3913875 | 3913876 | 3914055 | 3914077 | +    | PA3496      | 272 | 587 |
|         | 3915337 | 3914117 | -       | -    | PA3497      | 14  | 17  |
| 3916763 | 3916763 | 3915807 | -       | -    | PA3498      | 16  | 11  |
|         | 3917212 | 3916778 | -       | -    | PA3499      | 8   | 4   |
|         | 3918228 | 3917209 | -       | -    | PA3500      | 6   | 5   |
| 3918469 | 3918469 | 3918251 | 3918251 | -    | PA3501      | 1   | 6   |
|         | 3918788 | 3918471 | -       | -    | PA3502      | 9   | 6   |
|         | 3919431 | 3918796 | -       | -    | PA3503      | 3   | 2   |
|         | 3921258 | 3919774 | -       | -    | PA3504      | 7   | 4   |
|         | 3922073 | 3921270 | -       | -    | PA3505      | 5   | 5   |
|         | 3923766 | 3922084 | -       | -    | PA3506      | 2   | 3   |
|         | 3924556 | 3923759 | -       | -    | PA3507      | 4   | 3   |
|         | 3925376 | 3924543 | -       | -    | PA3508      | 6   | 3   |
|         | 3926238 | 3925369 | -       | -    | PA3509      | 3   | 2   |
|         | 3926777 | 3926247 | -       | -    | PA3510      | 7   | 3   |
|         | 3927552 | 3926791 | -       | -    | PA3511      | 4   | 2   |
|         | 3928334 | 3927558 | -       | -    | PA3512      | 4   | 0   |

|         |         |         |           |       |              |      |      |
|---------|---------|---------|-----------|-------|--------------|------|------|
|         | 3929338 | 3928331 | -         | -     | PA3513       | 5    | 1    |
|         | 3930230 | 3929379 | -         | -     | PA3514       | 5    | 1    |
|         | 3931816 | 3930743 | -         | -     | PA3515       | 19   | 19   |
|         | 3933317 | 3931866 | -         | -     | PA3516       | 6    | 5    |
|         | 3934750 | 3933317 | -         | -     | PA3517       | 5    | 3    |
|         | 3935767 | 3934781 | -         | -     | PA3518       | 2    | 2    |
|         | 3936837 | 3935800 | -         | -     | PA3519       | 2    | 3    |
|         | 3937432 | 3937238 | -         | -     | PA3520       | 6    | 4    |
|         | 3939495 | 3938020 | -         | -     | PA3521       | 2    | 1    |
|         | 3942653 | 3939492 | -         | -     | PA3522       | 3    | 2    |
|         | 3943807 | 3942650 | -         | -     | PA3523       | 3    | 3    |
| 3944169 | 3944184 | 3944570 | 3944599 + | gloA1 | PA3524       | 465  | 280  |
| 3945879 | 3945879 | 3944662 | 3944644 - | argG  | PA3525       | 513  | 439  |
| 3946982 | 3946962 | 3945997 | 3945880 - | -     | PA3526       | 60   | 45   |
| 3947092 | 3947095 | 3948141 | +         | pyrC  | PA3527       | 160  | 138  |
|         | 3948138 | 3948812 | 3948916 + | rnt   | PA3528       | 164  | 145  |
| 3949661 | 3949593 | 3948991 | 3948973 - | -     | PA3529       | 1798 | 1145 |
| 3949662 |         |         | 3949676 ? | -     | predicted RN | 615  | 483  |
| 3949845 | 3949853 | 3950074 | 3950086 + | -     | PA3530       | 35   | 86   |
| 3950280 | 3950284 | 3950760 | 3950762 + | bfrB  | PA3531       | 789  | 337  |
|         | 3951978 | 3950827 | -         | -     | PA3532       | 29   | 17   |
| 3952412 | 3952387 | 3952061 | 3952058 - | -     | PA3533       | 1002 | 461  |
|         | 3954608 | 3952500 | -         | -     | PA3534       | 7    | 2    |
|         | 3954907 | 3957894 | +         | -     | PA3535       | 26   | 25   |
| 3958825 | 3958755 | 3958288 | 3957895 - | -     | PA3536       | 62   | 48   |
| 3958995 | 3959033 | 3959950 | 3959950 + | argF  | PA3537       | 144  | 80   |
| 3959951 | 3959955 | 3961037 | 3961037 + | -     | PA3538       | 130  | 81   |
| 3961038 | 3961144 | 3961923 | 3961930 + | -     | PA3539       | 96   | 67   |
|         | 3962825 | 3964135 | +         | algD  | PA3540       | 6    | 3    |
|         | 3964275 | 3965759 | +         | alg8  | PA3541       | 4    | 4    |
|         | 3965842 | 3967011 | +         | alg44 | PA3542       | 3    | 2    |
|         | 3967025 | 3968452 | +         | algK  | PA3543       | 3    | 2    |

|         |         |         |   |      |        |     |     |
|---------|---------|---------|---|------|--------|-----|-----|
|         | 3968449 | 3969921 | + | alge | PA3544 | 3   | 1   |
|         | 3969942 | 3971573 | + | algG | PA3545 | 20  | 7   |
|         | 3971586 | 3973010 | + | algX | PA3546 | 1   | 1   |
|         | 3973014 | 3974117 | + | algL | PA3547 | 2   | 1   |
|         | 3974359 | 3975921 | + | algI | PA3548 | 3   | 2   |
|         | 3975936 | 3977111 | + | algJ | PA3549 | 3   | 1   |
|         | 3977184 | 3977834 | + | algF | PA3550 | 5   | 6   |
|         | 3978031 | 3979476 | + | alga | PA3551 | 5   | 4   |
|         | 3979860 | 3981008 | + | arnB | PA3552 | 95  | 70  |
| 3979834 | 3981005 | 3982024 | + | arnC | PA3553 | 69  | 52  |
|         | 3982021 | 3984009 | + | arnA | PA3554 | 91  | 77  |
|         | 3984006 | 3984893 | + | arnD | PA3555 | 41  | 44  |
|         | 3984890 | 3986539 | + | arnT | PA3556 | 36  | 32  |
|         | 3986536 | 3986883 | + | arnE | PA3557 | 35  | 31  |
|         | 3986880 | 3987293 | + | arnF | PA3558 | 37  | 35  |
|         | 3987290 | 3988684 | + | -    | PA3559 | 76  | 59  |
| 3990595 | 3990595 | 3988838 | - | fruA | PA3560 | 67  | 69  |
|         | 3991541 | 3990597 | - | fruK | PA3561 | 77  | 74  |
| 3994442 | 3994411 | 3991541 | - | fruI | PA3562 | 85  | 79  |
| 3994639 | 3994739 | 3995728 | + | fruR | PA3563 | 55  | 42  |
|         | 3995841 | 3996518 | + | -    | PA3564 | 32  | 19  |
|         | 3997726 | 3996806 | - | -    | PA3565 | 17  | 8   |
| 3997785 | 3997822 | 3998115 | + | -    | PA3566 | 71  | 38  |
| 3998137 | 3998137 | 3999150 | + | -    | PA3567 | 57  | 35  |
|         | 4001094 | 3999208 | - | -    | PA3568 | 9   | 5   |
|         | 4002092 | 4001196 | - | mmsB | PA3569 | 2   | 5   |
|         | 4003601 | 4002108 | - | mmsA | PA3570 | 7   | 10  |
|         | 4003733 | 4004656 | + | mmsR | PA3571 | 16  | 9   |
| 4004767 | 4004783 | 4004959 | + | -    | PA3572 | 504 | 328 |
|         | 4006145 | 4004967 | - | -    | PA3573 | 42  | 34  |
| 4006487 | 4006510 | 4007148 | + | nalD | PA3574 | 87  | 69  |
| 4007294 | 4007507 | 4008037 | + | -    | PA3575 | 39  | 58  |

|         |         |         |         |         |         |   |      |        |        |     |     |     |    |
|---------|---------|---------|---------|---------|---------|---|------|--------|--------|-----|-----|-----|----|
| 4018018 | 4018441 | 4018444 | 4018112 | 4018458 | 4018457 | + | -    | glpM   | PA3585 | 20  | 9   | 16  | 49 |
| 4015399 | 4016441 | 4017979 | 4016163 | 4016281 | +       | + | glpD | PA3584 | 50     | 7   | 7   | 45  |    |
|         | 4015408 | 4016163 | 4015202 | 4015202 | +       | + | glpK | PA3582 | 133    | 35  | 35  | 35  |    |
|         | 4013685 | 4013645 | 4012806 | 4013645 | +       | + | glpF | PA3581 | 78     | 19  | 20  | 19  |    |
|         | 4012776 | 4012541 | 4012071 | 4012008 | -       | - | -    | PA3580 | 73     | 20  | 20  | 20  |    |
|         | 4012007 | 4012007 | 4010523 | 4010523 | -       | - | -    | PA3579 | 60     | 18  | 18  | 18  |    |
| 4012728 | 4010327 | 4009542 | -       | -       | -       | - | -    | PA3578 | 39     | 9   | 9   | 9   |    |
|         | 4009051 | 4008938 | -       | -       | -       | - | -    | PA3577 | 15     | 13  | 13  | 13  |    |
|         | 4008136 | 4008558 | +       | +       | -       | - | -    | PA3576 | 40     | 23  | 23  | 23  |    |
|         | 4013670 | 4015399 | 4015408 | 4016163 | 4016281 | + | +    | glpR   | PA3583 | 94  | 45  | 45  | 45 |
|         |         | 4013685 | 4015202 | 4013645 | 4013645 | + | +    | glpK   | PA3582 | 133 | 35  | 35  | 35 |
| 4012776 |         | 4012806 | 4013645 | 4013645 | +       | + | glpF | PA3581 | 78     | 19  | 20  | 19  |    |
| 4012007 |         | 4012007 | 4010523 | 4010523 | -       | - | -    | PA3580 | 73     | 20  | 20  | 20  |    |
| 4012728 |         | 4012541 | 4012071 | 4012008 | -       | - | -    | PA3579 | 60     | 18  | 18  | 18  |    |
| 4015399 | 4013685 | 4013645 | 4015202 | 4015202 | +       | + | glpK | PA3582 | 133    | 35  | 35  | 35  |    |
|         | 4015408 | 4016163 | 4016281 | 4016281 | +       | + | glpR | PA3583 | 94     | 45  | 45  | 45  |    |
|         | 4016441 | 4017979 | 4016163 | 4016281 | +       | + | glpD | PA3584 | 50     | 7   | 7   | 7   |    |
|         | 4018112 | 4018441 | 4018458 | 4018457 | +       | + | glpM | PA3585 | 20     | 9   | 16  | 49  |    |
|         | 4019444 | 4019743 | 4020663 | 4020663 | +       | + | metR | PA3587 | 39     | 16  | 16  | 16  |    |
| 4040869 | 4021919 | 4020669 | 4021972 | 4021972 | -       | - | -    | PA3588 | 7      | 3   | 3   | 3   |    |
|         | 4023177 | 4021972 | 4023200 | 4023200 | -       | - | -    | PA3589 | 1      | 1   | 1   | 1   |    |
|         | 4024732 | 4024729 | 4025526 | 4025526 | -       | - | -    | PA3590 | 5      | 3   | 3   | 3   |    |
|         | 4026773 | 4025586 | 4026773 | 4025586 | -       | - | -    | PA3591 | 2      | 0   | 0   | 0   |    |
|         | 4028539 | 4026812 | 4028539 | 4026812 | -       | - | -    | PA3592 | 1      | 1   | 1   | 1   |    |
| 4039048 | 4028653 | 4029540 | 4031168 | 4031165 | +       | + | -    | PA3593 | 2      | 3   | 3   | 3   |    |
|         | 4029759 | 4031168 | 4032238 | 4031165 | +       | + | -    | PA3594 | 15     | 9   | 9   | 9   |    |
|         | 4032238 | 4031165 | 4033650 | 4032328 | -       | - | -    | PA3595 | 4      | 3   | 3   | 3   |    |
|         | 4033650 | 4033850 | 4034665 | 4033850 | -       | - | -    | PA3596 | 5      | 3   | 3   | 3   |    |
|         | 4034665 | 4035578 | 4035758 | 4035578 | +       | + | -    | PA3597 | 7      | 3   | 3   | 3   |    |
| 4036042 | 4034793 | 4035578 | 4035758 | 4035606 | -       | - | -    | PA3598 | 7      | 3   | 3   | 3   |    |
|         | 4035758 | 4035606 | 4036021 | 4035758 | -       | - | -    | PA3599 | 30     | 19  | 19  | 19  |    |
|         | 4036021 | 4037875 | 4037896 | 4037896 | +       | + | -    | PA3600 | 26     | 10  | 10  | 10  |    |
|         | 4036192 | 4038387 | 4038388 | 4038388 | -       | - | -    | PA3601 | 25     | 11  | 11  | 11  |    |
|         | 4038387 | 4039041 | 4039041 | 4040100 | +       | + | -    | PA3602 | 88     | 47  | 47  | 47  |    |
| 4040869 | 4040820 | 4040104 | 4040104 | 4040104 | -       | - | -    | PA3603 | 78     | 86  | 86  | 86  |    |
|         | 4041034 | 4041034 | 4042172 | 4042172 | +       | + | pota | PA3604 | 158    | 148 | 148 | 148 |    |
|         | 4042172 | 4042172 | 4042172 | 4042172 | +       | + | pota | PA3605 | 43     | 32  | 32  | 32  |    |
|         | 4040869 | 4040820 | 4040104 | 4040104 | -       | - | -    | PA3606 | 65     | 70  | 70  | 70  |    |
|         | 4041034 | 4041079 | 4042170 | 4042172 | +       | + | pota | PA3607 | 67     | 57  | 57  | 57  |    |

|         |         |           |           |      |              |      |      |
|---------|---------|-----------|-----------|------|--------------|------|------|
| 4042175 | 4042175 | 4043068   | +         | potB | PA3608       | 64   | 41   |
|         | 4043061 | 4043831   | 4043894 + | potC | PA3609       | 54   | 40   |
| 4043895 | 4043920 | 4044984   | 4045005 + | potD | PA3610       | 100  | 75   |
| 4045147 | 4045160 | 4045570   | 4045588 + | -    | PA3611       | 222  | 217  |
| 4045589 | 4045589 | 4045810   | 4045891 + | -    | PA3612       | 115  | 144  |
| 4048339 | 4048339 | 4045934   | 4045934 - | -    | PA3613       | 81   | 88   |
| 4048457 |         | 4048518 ? | 4048518 ? | -    | predicted RN | 179  | 48   |
|         | 4048519 | 4049922   | 4049922 + | -    | PA3614       | 78   | 28   |
| 4049923 | 4050005 | 4051075   | 4051096 + | -    | PA3615       | 74   | 39   |
| 4051561 | 4051558 | 4051097   | 4051097 - | -    | PA3616       | 171  | 99   |
| 4052630 | 4052604 | 4051564   | 4051564 - | recA | PA3617       | 557  | 302  |
|         | 4053244 | 4052738   | -         | -    | PA3618       | 59   | 24   |
|         | 4053392 | 4054399   | +         | -    | PA3619       | 11   | 5    |
| 4054506 | 4054525 | 4057092   | 4057148 + | mutS | PA3620       | 128  | 88   |
| 4057152 | 4057159 | 4057482   | 4057487 + | fdxA | PA3621       | 302  | 283  |
| 4057658 |         | 4057543 - | 4057543 - | rsmZ | PA3621.1     | 29   | 55   |
| 4058913 | 4058913 | 4057909   | 4057901 - | rpos | PA3622       | 241  | 169  |
| 4059956 | 4059911 | 4059018   | 4058914 - | -    | PA3623       | 258  | 172  |
| 4060624 | 4060592 | 4059957   | 4059957 - | pcm  | PA3624       | 317  | 256  |
|         | 4061374 | 4060625   | 4060625 - | sure | PA3625       | 256  | 243  |
|         | 4062429 | 4061362   | -         | -    | PA3626       | 143  | 131  |
| 4062899 | 4062899 | 4062426   | -         | ygbB | PA3627       | 210  | 210  |
| 4063821 | 4063821 | 4062970   | 4062900 - | -    | PA3628       | 109  | 67   |
| 4065022 | 4064987 | 4063875   | 4063847 - | adhC | PA3629       | 240  | 118  |
|         | 4065119 | 4066027   | +         | -    | PA3630       | 18   | 12   |
| 4066079 | 4066103 | 4067329   | +         | -    | PA3631       | 99   | 82   |
|         | 4067295 | 4067543   | 4067545 + | -    | PA3632       | 176  | 173  |
| 4068308 | 4068308 | 4067604   | 4067551 - | ygbP | PA3633       | 93   | 94   |
| 4068665 | 4068612 | 4068328   | 4068321 - | -    | PA3634       | 214  | 209  |
| 4070011 | 4069966 | 4068677   | 4068671 - | eno  | PA3635       | 1056 | 1014 |
| 4070857 | 4070857 | 4070012   | 4070012 - | kdsA | PA3636       | 659  | 709  |
| 4072558 | 4072488 | 4070860   | 4070858 - | pyrG | PA3637       | 666  | 798  |

|         |         |         |           |       |              |      |      |
|---------|---------|---------|-----------|-------|--------------|------|------|
| 4072559 |         |         | 4072603 ? | -     | predicted RN | 290  | 793  |
| 4074056 | 4073987 | 4072659 | 4072652 - | -     | PA3638       | 54   | 63   |
| 4075036 | 4075007 | 4074057 | 4074057 - | acca  | PA3639       | 567  | 615  |
| 4075037 |         |         | 4075130 ? | -     | predicted RN | 383  | 484  |
| 4078713 | 4078678 | 4075157 | 4075131 - | dnaE  | PA3640       | 215  | 181  |
| 4078755 |         |         | 4078803 ? | -     | predicted RN | 478  | 321  |
| 4080295 | 4080223 | 4078808 | 4078808 - | -     | PA3641       | 508  | 392  |
|         | 4081045 | 4080440 | 4080398 - | rnhB  | PA3642       | 102  | 89   |
| 4082184 | 4082181 | 4081045 | -         | lpxB  | PA3643       | 135  | 156  |
|         | 4082961 | 4082185 | 4082185 - | lpxA  | PA3644       | 559  | 543  |
| 4083441 | 4083398 | 4082958 | -         | fabZ  | PA3645       | 678  | 730  |
|         | 4084505 | 4083444 | 4083444 - | lpxD  | PA3646       | 416  | 408  |
| 4085040 | 4085011 | 4084505 | -         | -     | PA3647       | 698  | 655  |
| 4087472 | 4087455 | 4085062 | 4085041 - | opr86 | PA3648       | 412  | 365  |
| 4088903 | 4088878 | 4087526 | 4087473 - | -     | PA3649       | 165  | 179  |
|         | 4090094 | 4088904 | 4088904 - | dxr   | PA3650       | 203  | 201  |
|         | 4090906 | 4090091 | -         | cdsA  | PA3651       | 248  | 257  |
| 4091655 | 4091655 | 4090900 | -         | upps  | PA3652       | 476  | 432  |
| 4092230 | 4092228 | 4091671 | 4091656 - | frf   | PA3653       | 1266 | 930  |
| 4093166 | 4092968 | 4092231 | 4092231 - | pyrH  | PA3654       | 543  | 430  |
| 4094166 | 4094036 | 4093167 | 4093167 - | tsf   | PA3655       | 4005 | 3372 |
| 4095023 | 4094907 | 4094167 | 4094167 - | rpsB  | PA3656       | 6882 | 6330 |
| 4095155 | 4095172 | 4095957 | 4095961 + | map   | PA3657       | 479  | 371  |
| 4095973 | 4096124 | 4098826 | 4098834 + | glnd  | PA3658       | 49   | 39   |
| 4098844 | 4098844 | 4100052 | 4100065 + | -     | PA3659       | 75   | 47   |
| 4101849 | 4101849 | 4100104 | 4100104 - | -     | PA3660       | 34   | 14   |
|         | 4102087 | 4102446 | +         | -     | PA3661       | 18   | 18   |
| 4102702 | 4102768 | 4103061 | 4103061 + | -     | PA3662       | 170  | 71   |
| 4103566 | 4103429 | 4103076 | 4103062 - | -     | PA3663       | 59   | 41   |
| 4103712 | 4103732 | 4104079 | 4104079 + | -     | PA3664       | 187  | 125  |
| 4104080 | 4104092 | 4104715 | 4104715 + | -     | PA3665       | 115  | 82   |
| 4104740 | 4104745 | 4105779 | 4105779 + | dapD  | PA3666       | 383  | 244  |

|         |         |         |           |      |        |     |     |
|---------|---------|---------|-----------|------|--------|-----|-----|
| 4105780 | 4105874 | 4107079 | +         | -    | PA3667 | 61  | 47  |
|         | 4107076 | 4107498 | 4107504 + | -    | PA3668 | 44  | 37  |
| 4108485 | 4108485 | 4107505 | 4107505 - | -    | PA3669 | 23  | 23  |
|         | 4110336 | 4108489 | -         | -    | PA3670 | 21  | 19  |
|         | 4111081 | 4110347 | -         | -    | PA3671 | 26  | 19  |
|         | 4112001 | 4111078 | -         | -    | PA3672 | 30  | 29  |
| 4112251 | 4112285 | 4114789 | 4114916 + | plsb | PA3673 | 59  | 50  |
| 4114917 | 4114933 | 4115331 | 4115344 + | -    | PA3674 | 155 | 82  |
| 4115461 | 4115468 | 4116148 | 4116187 + | -    | PA3675 | 158 | 133 |
|         | 4119265 | 4116188 | -         | -    | PA3676 | 29  | 34  |
|         | 4120373 | 4119270 | -         | -    | PA3677 | 11  | 23  |
| 4120438 | 4120469 | 4121107 | 4121107 + | -    | PA3678 | 59  | 54  |
| 4122404 | 4122391 | 4121114 | 4121111 - | -    | PA3679 | 46  | 44  |
| 4123213 | 4123205 | 4122420 | 4122405 - | -    | PA3680 | 81  | 69  |
|         | 4123956 | 4123261 | -         | -    | PA3681 | 21  | 20  |
|         | 4124785 | 4123961 | -         | -    | PA3682 | 8   | 6   |
| 4125724 | 4125724 | 4124858 | -         | -    | PA3683 | 46  | 35  |
| 4126163 | 4126090 | 4125743 | 4125725 - | -    | PA3684 | 115 | 86  |
| 4126906 | 4126844 | 4126164 | 4126164 - | -    | PA3685 | 136 | 103 |
| 4127655 | 4127595 | 4126948 | 4126941 - | adk  | PA3686 | 620 | 275 |
|         | 4130392 | 4127756 | -         | ppc  | PA3687 | 26  | 14  |
| 4130599 | 4130599 | 4130943 | +         | -    | PA3688 | 11  | 9   |
|         | 4131422 | 4130952 | -         | -    | PA3689 | 31  | 17  |
|         | 4131536 | 4133758 | +         | -    | PA3690 | 33  | 24  |
| 4133998 | 4134138 | 4134542 | 4134542 + | -    | PA3691 | 59  | 29  |
| 4134544 | 4134591 | 4135376 | 4135376 + | lptf | PA3692 | 55  | 34  |
|         | 4135973 | 4135452 | 4135444 - | -    | PA3693 | 64  | 51  |
|         | 4136293 | 4135970 | -         | -    | PA3694 | 111 | 108 |
|         | 4137195 | 4136290 | -         | -    | PA3695 | 44  | 37  |
| 4138006 | 4137938 | 4137192 | -         | -    | PA3696 | 45  | 26  |
|         | 4139302 | 4138007 | -         | -    | PA3697 | 50  | 32  |
| 4139862 | 4139862 | 4139311 | 4139303 - | -    | PA3698 | 71  | 44  |

|         |         |         |         |   |             |     |     |
|---------|---------|---------|---------|---|-------------|-----|-----|
| 4140832 | 4140672 | 4139959 | 4139863 | - | PA3699      | 65  | 54  |
| 4142389 | 4142389 | 4140884 | 4140869 | - | lyss PA3700 | 538 | 472 |
| 4143670 | 4143665 | 4142570 | 4142390 | - | prfb PA3701 | 597 | 521 |
| 4144887 | 4144831 | 4143788 | 4143673 | - | wspr PA3702 | 58  | 47  |
|         | 4145946 | 4144939 | 4144888 | - | wspf PA3703 | 59  | 47  |
|         | 4148252 | 4145943 |         | - | wspe PA3704 | 74  | 54  |
|         | 4148938 | 4148249 |         | - | wspd PA3705 | 76  | 57  |
|         | 4150199 | 4148931 |         | - | wspc PA3706 | 64  | 50  |
| 4150711 | 4150711 | 4150196 |         | - | wspb PA3707 | 92  | 74  |
| 4152467 | 4152344 | 4150716 | 4150712 | - | wspa PA3708 | 103 | 78  |
|         | 4154230 | 4152611 |         | - | PA3709      | 9   | 4   |
|         | 4156012 | 4154339 |         | - | PA3710      | 7   | 5   |
|         | 4156184 | 4157089 | 4157089 | + | PA3711      | 23  | 18  |
|         | 4157821 | 4157126 |         | - | PA3712      | 41  | 14  |
| 4158042 | 4158143 | 4160005 | 4160328 | + | spdh PA3713 | 109 | 44  |
|         | 4160329 | 4160970 |         | + | PA3714      | 17  | 9   |
| 4161029 | 4161091 | 4161894 | 4161972 | + | PA3715      | 67  | 51  |
| 4163749 | 4163679 | 4161973 | 4161973 | - | PA3716      | 290 | 204 |
| 4163865 | 4163890 | 4164231 | 4164329 | + | PA3717      | 52  | 46  |
|         | 4165571 | 4164330 |         | - | PA3718      | 6   | 4   |
|         | 4165880 | 4165719 |         | - | armR PA3719 | 23  | 6   |
|         | 4166313 | 4165888 |         | - | PA3720      | 24  | 7   |
| 4166493 | 4166518 | 4167159 | 4167168 | + | nalC PA3721 | 69  | 85  |
| 4167542 | 4167522 | 4167172 | 4167169 | - | PA3722      | 169 | 279 |
|         | 4168817 | 4167711 |         | - | PA3723      | 7   | 5   |
|         | 4170483 | 4168987 | 4168987 | - | lasB PA3724 | 22  | 12  |
| 4172528 | 4172485 | 4170770 | 4170690 | - | recJ PA3725 | 78  | 59  |
| 4173068 | 4173068 | 4172529 | 4172529 | - | PA3726      | 103 | 87  |
| 4173867 | 4173867 | 4173175 | 4173069 | - | PA3727      | 58  | 52  |
| 4179233 | 4179126 | 4173886 | 4173868 | - | PA3728      | 96  | 76  |
| 4181377 | 4181342 | 4179276 | 4179276 | - | PA3729      | 287 | 186 |
| 4182066 | 4182019 | 4181378 | 4181378 | - | PA3730      | 106 | 80  |

|         |         |         |         |      |              |      |      |
|---------|---------|---------|---------|------|--------------|------|------|
| 4182770 | 4182770 | 4182075 | 4182075 | -    | PA3731       | 224  | 155  |
| 4183342 | 4183228 | 4182785 | 4182771 | -    | PA3732       | 321  | 203  |
|         | 4183710 | 4184939 | +       | -    | PA3733       | 31   | 25   |
|         | 4185522 | 4186727 | +       | -    | PA3734       | 6    | 5    |
| 4188242 | 4188190 | 4186781 | 4186781 | thrc | PA3735       | 248  | 169  |
| 4189682 | 4189547 | 4188243 | 4188243 | hom  | PA3736       | 234  | 179  |
| 4190489 | 4190489 | 4189761 | 4189733 | dsbc | PA3737       | 313  | 257  |
| 4191526 | 4191512 | 4190616 | 4190490 | xerD | PA3738       | 44   | 31   |
|         | 4191727 | 4193562 | +       | -    | PA3739       | 12   | 7    |
| 4193659 | 4193675 | 4194361 | 4194403 | -    | PA3740       | 38   | 26   |
| 4195007 | 4194856 | 4194431 | 4194431 | -    | PA3741       | 72   | 54   |
| 4195386 | 4195358 | 4195008 | 4195008 | rplS | PA3742       | 4877 | 4147 |
| 4195387 |         |         | 4195399 | -    | predicted RN | 4606 | 4157 |
| 4196164 | 4196158 | 4195400 | 4195400 | trmD | PA3743       | 2359 | 2713 |
| 4196692 | 4196692 | 4196165 | 4196165 | rimM | PA3744       | 2994 | 3589 |
| 4196975 | 4196959 | 4196708 | 4196693 | rpsP | PA3745       | 3715 | 4000 |
| 4196976 |         |         | 4196998 | -    | predicted RN | 1935 | 2442 |
| 4198555 | 4198542 | 4197169 | 4196999 | ffh  | PA3746       | 382  | 334  |
| 4198841 | 4198843 | 4199643 | 4199655 | -    | PA3747       | 142  | 103  |
| 4199656 | 4199656 | 4200948 | 4201111 | -    | PA3748       | 43   | 39   |
|         | 4201252 | 4202565 | +       | -    | PA3749       | 7    | 5    |
|         | 4203322 | 4202573 | -       | -    | PA3750       | 34   | 31   |
| 4204542 | 4204505 | 4203324 | 4203323 | purT | PA3751       | 86   | 61   |
|         | 4204737 | 4204543 | 4204543 | -    | PA3752       | 94   | 56   |
| 4205295 | 4205258 | 4204734 | -       | -    | PA3753       | 115  | 79   |
| 4205923 | 4205907 | 4205296 | 4205296 | -    | PA3754       | 125  | 56   |
| 4206032 | 4206048 | 4206602 | 4206602 | -    | PA3755       | 64   | 30   |
| 4206603 | 4206665 | 4207165 | 4207192 | -    | PA3756       | 181  | 145  |
|         | 4207408 | 4208151 | +       | -    | PA3757       | 14   | 10   |
|         | 4208168 | 4209259 | +       | -    | PA3758       | 18   | 10   |
|         | 4209256 | 4210278 | +       | -    | PA3759       | 15   | 11   |
|         | 4210295 | 4212823 | +       | -    | PA3760       | 17   | 12   |

|         |         |         |           |      |              |     |     |
|---------|---------|---------|-----------|------|--------------|-----|-----|
| 4215142 | 4212848 | 4214560 | +         | -    | PA3761       | 13  | 11  |
| 4219458 | 4215079 | 4214762 | 4214751 - | -    | PA3762       | 149 | 33  |
| 4219736 | 4219440 | 4215544 | 4215544 - | purl | PA3763       | 279 | 264 |
| 4223179 | 4219841 | 4221199 | 4221212 + | -    | PA3764       | 62  | 46  |
| 4225516 | 4221797 | 4221213 | -         | -    | PA3765       | 31  | 24  |
| 4227300 | 4223179 | 4221923 | 4221923 - | -    | PA3766       | 92  | 14  |
| 4227301 | 4224116 | 4223568 | 4223387 - | -    | PA3767       | 80  | 77  |
| 4228801 | 4225498 | 4224107 | -         | -    | PA3768       | 113 | 116 |
|         | 4227237 | 4225660 | 4225642 - | guaA | PA3769       | 483 | 390 |
|         |         |         | 4227315 ? | -    | predicted RN | 671 | 539 |
|         | 4228786 | 4227317 | 4227316 - | guaB | PA3770       | 740 | 668 |
|         | 4229050 | 4230027 | +         | -    | PA3771       | 9   | 6   |
|         | 4230162 | 4231058 | +         | -    | PA3772       | 1   | 1   |
|         | 4231071 | 4232228 | +         | -    | PA3773       | 0   | 0   |
|         | 4232258 | 4233400 | +         | -    | PA3774       | 1   | 1   |
|         | 4234167 | 4233385 | -         | -    | PA3775       | 2   | 2   |
| 4235210 | 4234275 | 4235183 | +         | -    | PA3776       | 7   | 7   |
| 4236606 | 4235220 | 4236599 | 4236605 + | xseA | PA3777       | 67  | 58  |
|         | 4236606 | 4237541 | +         | -    | PA3778       | 31  | 28  |
|         | 4237693 | 4238733 | +         | -    | PA3779       | 17  | 17  |
|         | 4238808 | 4239302 | +         | -    | PA3780       | 12  | 10  |
|         | 4239299 | 4240579 | +         | -    | PA3781       | 11  | 12  |
|         | 4242295 | 4241342 | -         | -    | PA3782       | 31  | 24  |
| 4243708 | 4242416 | 4243045 | +         | -    | PA3783       | 23  | 17  |
| 4244192 | 4243652 | 4243080 | 4243046 - | -    | PA3784       | 43  | 52  |
| 4244714 | 4244185 | 4243709 | 4243709 - | -    | PA3785       | 36  | 66  |
| 4244861 | 4244704 | 4244315 | 4244284 - | -    | PA3786       | 50  | 44  |
|         | 4244876 | 4245724 | 4245809 + | -    | PA3787       | 43  | 35  |
| 4247638 | 4245810 | 4246205 | +         | -    | PA3788       | 31  | 23  |
| 4249775 | 4247638 | 4246223 | -         | -    | PA3789       | 28  | 26  |
| 4250593 | 4249874 | 4247703 | 4247639 - | oprc | PA3790       | 45  | 59  |
|         | 4250456 | 4249995 | 4249976 - | -    | PA3791       | 39  | 37  |

|         |         |         |           |      |              |      |      |
|---------|---------|---------|-----------|------|--------------|------|------|
| 4250755 | 4250828 | 4252606 | 4252611 + | leuA | PA3792       | 108  | 71   |
| 4253009 | 4253009 | 4252677 | 4252677 - | -    | PA3793       | 178  | 125  |
| 4253569 | 4253518 | 4253063 | 4253013 - | -    | PA3794       | 107  | 78   |
|         | 4253699 | 4254649 | 4254649 + | -    | PA3795       | 38   | 30   |
|         | 4255324 | 4254737 | -         | -    | PA3796       | 44   | 43   |
|         | 4256252 | 4255458 | 4255333 - | -    | PA3797       | 83   | 56   |
| 4257426 | 4257388 | 4256240 | -         | -    | PA3798       | 83   | 54   |
| 4259219 | 4259177 | 4257696 | 4257696 - | -    | PA3799       | 222  | 199  |
| 4260398 | 4260397 | 4259255 | 4259255 - | -    | PA3800       | 437  | 360  |
| 4261043 | 4261043 | 4260399 | 4260399 - | -    | PA3801       | 429  | 362  |
| 4262368 | 4262359 | 4261070 | 4261044 - | hiss | PA3802       | 317  | 301  |
|         | 4263493 | 4262378 | 4262374 - | gcpe | PA3803       | 314  | 317  |
|         | 4264533 | 4263490 | -         | -    | PA3804       | 221  | 207  |
| 4265305 | 4265288 | 4264530 | -         | pilF | PA3805       | 252  | 240  |
| 4266445 | 4266445 | 4265306 | 4265306 - | -    | PA3806       | 902  | 727  |
| 4266910 | 4266901 | 4266470 | 4266446 - | ndk  | PA3807       | 3544 | 2646 |
| 4266911 |         |         | 4267076 ? | -    | predicted RN | 1331 | 1597 |
| 4267345 | 4267345 | 4267145 | 4267116 - | -    | PA3808       | 484  | 404  |
| 4267715 | 4267710 | 4267372 | 4267346 - | fdx2 | PA3809       | 441  | 437  |
| 4269582 | 4269576 | 4267717 | 4267716 - | hscA | PA3810       | 233  | 182  |
| 4270140 | 4270140 | 4269619 | 4269619 - | hscB | PA3811       | 443  | 356  |
| 4270498 | 4270471 | 4270148 | 4270141 - | isca | PA3812       | 927  | 740  |
| 4270885 | 4270885 | 4270499 | 4270499 - | iscU | PA3813       | 720  | 537  |
| 4270886 |         |         | 4270919 ? | -    | predicted RN | 619  | 588  |
| 4272135 | 4272135 | 4270921 | 4270920 - | iscS | PA3814       | 629  | 464  |
| 4272146 |         |         | 4272156 ? | -    | predicted RN | 481  | 386  |
| 4272724 | 4272656 | 4272165 | 4272158 - | iscR | PA3815       | 246  | 250  |
|         | 4273577 | 4272801 | 4272737 - | cysE | PA3816       | 156  | 99   |
| 4274367 | 4274350 | 4273577 | -         | -    | PA3817       | 117  | 85   |
| 4274493 | 4274502 | 4275317 | 4275323 + | -    | PA3818       | 227  | 257  |
| 4276011 | 4275970 | 4275422 | 4275417 - | -    | PA3819       | 169  | 158  |
| 4277084 | 4277074 | 4276154 | 4276111 - | secF | PA3820       | 650  | 491  |

|         |         |         |         |   |      |          |      |     |
|---------|---------|---------|---------|---|------|----------|------|-----|
| 4278999 | 4278947 | 4277085 | 4277085 | - | secD | PA3821   | 545  | 420 |
| 4279345 | 4279345 | 4279007 | 4279004 | - | -    | PA3822   | 1016 | 799 |
| 4280519 | 4280507 | 4279389 | 4279346 | - | tgt  | PA3823   | 266  | 235 |
| 4281566 | 4281563 | 4280520 | 4280520 | - | queA | PA3824   | 107  | 128 |
| 4281665 |         |         | 4281751 | + | -    | PA3824.1 | 47   | 85  |
|         | 4283658 | 4282078 |         | - | -    | PA3825   | 12   | 7   |
| 4283742 | 4283788 | 4284285 | 4284401 | + | -    | PA3826   | 71   | 79  |
|         | 4285484 | 4284417 | 4284402 | - | -    | PA3827   | 153  | 136 |
| 4286629 | 4286595 | 4285477 |         | - | -    | PA3828   | 148  | 154 |
|         | 4287710 | 4286787 |         | - | -    | PA3829   | 10   | 5   |
|         | 4288606 | 4287794 |         | - | -    | PA3830   | 16   | 11  |
| 4288726 | 4288943 | 4290430 |         | + | pepA | PA3831   | 307  | 230 |
|         | 4290427 | 4290855 | 4290866 | + | holC | PA3832   | 134  | 117 |
| 4290867 | 4290867 | 4291235 | 4291237 | + | -    | PA3833   | 99   | 94  |
| 4291339 | 4291356 | 4294208 | 4294208 | + | vals | PA3834   | 303  | 247 |
| 4294640 | 4294605 | 4294255 | 4294218 | - | -    | PA3835   | 40   | 35  |
| 4297202 | 4297250 | 4298227 | 4298227 | + | -    | PA3836   | 196  | 203 |
| 4298228 | 4298311 | 4299201 | 4299203 | + | -    | PA3837   | 95   | 96  |
| 4299204 | 4299204 | 4299998 | 4300006 | + | -    | PA3838   | 101  | 82  |
|         | 4300117 | 4301949 | 4301949 | + | -    | PA3839   | 43   | 30  |
|         | 4302041 | 4303051 | 4303051 | + | -    | PA3840   | 38   | 29  |
|         | 4304502 | 4303141 |         | - | exoS | PA3841   | 70   | 12  |
|         | 4304690 | 4305040 |         | + | -    | PA3842   | 49   | 14  |
|         | 4305064 | 4305426 |         | + | -    | PA3843   | 27   | 5   |
|         | 4306256 | 4305645 |         | - | -    | PA3844   | 10   | 6   |
|         | 4306380 | 4307276 |         | + | -    | PA3845   | 24   | 17  |
|         | 4307808 | 4307266 |         | - | -    | PA3846   | 33   | 17  |
|         | 4307912 | 4308382 |         | + | -    | PA3847   | 27   | 24  |
| 4308456 | 4308456 | 4309811 |         | + | -    | PA3848   | 35   | 23  |
| 4309867 | 4309904 | 4310908 | 4310908 | + | -    | PA3849   | 178  | 135 |
| 4311871 | 4311862 | 4310951 | 4310909 | - | -    | PA3850   | 128  | 88  |
| 4312706 | 4312703 | 4311951 | 4311895 | - | -    | PA3851   | 57   | 27  |

|         |         |         |         |       |        |     |     |
|---------|---------|---------|---------|-------|--------|-----|-----|
| 4313644 | 4313642 | 4312707 | 4312707 | -     | PA3852 | 50  | 32  |
| 4314452 | 4314452 | 4313763 | 4313746 | -     | PA3853 | 63  | 57  |
| 4315555 | 4314795 | 4314481 | 4314468 | -     | PA3854 | 64  | 60  |
| 4316844 | 4315489 | 4314788 | -       | -     | PA3855 | 47  | 38  |
|         | 4316038 | 4315556 | 4315556 | -     | PA3856 | 44  | 18  |
|         | 4316825 | 4316109 | 4316039 | -     | PA3857 | 82  | 40  |
| 4318236 | 4317962 | 4316937 | -       | -     | PA3858 | 28  | 16  |
|         | 4318259 | 4318906 | 4318921 | +     | PA3859 | 97  | 64  |
|         | 4320820 | 4318922 | -       | -     | PA3860 | 15  | 9   |
| 4321098 | 4321434 | 4322627 | 4322635 | +     | rhI    | 409 | 350 |
|         | 4322788 | 4323735 | +       | +     | daub   | 35  | 28  |
| 4323758 | 4323758 | 4324885 | +       | +     | dauA   | 31  | 20  |
| 4324934 | 4324948 | 4325580 | 4325603 | +     | daur   | 58  | 46  |
|         | 4326395 | 4325604 | -       | -     | PA3865 | 34  | 26  |
| 4329999 | 4329991 | 4327697 | 4327305 | -     | PA3866 | 158 | 59  |
|         | 4330321 | 4330896 | +       | -     | PA3867 | 13  | 9   |
|         | 4331452 | 4332462 | +       | -     | PA3868 | 6   | 2   |
|         | 4332653 | 4333036 | +       | -     | PA3869 | 13  | 8   |
|         | 4334346 | 4333357 | -       | moaA1 | PA3870 | 9   | 7   |
|         | 4335221 | 4334403 | -       | -     | PA3871 | 3   | 5   |
|         | 4335959 | 4335276 | -       | narI  | PA3872 | 4   | 8   |
|         | 4336702 | 4335962 | -       | narJ  | PA3873 | 2   | 4   |
|         | 4338249 | 4336708 | -       | narH  | PA3874 | 5   | 9   |
|         | 4342046 | 4338261 | -       | narG  | PA3875 | 4   | 5   |
|         | 4343528 | 4342122 | -       | narK2 | PA3876 | 3   | 4   |
|         | 4344835 | 4343540 | -       | narK1 | PA3877 | 4   | 4   |
|         | 4345010 | 4346878 | +       | narX  | PA3878 | 44  | 65  |
| 4347619 | 4346875 | 4347534 | 4347597 | +     | narL   | 98  | 101 |
|         | 4347619 | 4348014 | 4348099 | +     | PA3880 | 147 | 76  |
|         | 4348186 | 4348650 | +       | -     | PA3881 | 51  | 24  |
|         | 4348666 | 4349415 | +       | -     | PA3882 | 28  | 18  |
| 4349502 | 4349502 | 4350332 | +       | -     | PA3883 | 27  | 23  |

|         |         |         |       |        |     |     |
|---------|---------|---------|-------|--------|-----|-----|
| 4350353 | 4350739 | +       | -     | PA3884 | 12  | 14  |
|         | 4350834 | +       | tpbA  | PA3885 | 6   | 6   |
|         | 4351595 | +       | -     | PA3886 | 45  | 23  |
|         | 4354102 | 4352828 | nhap  | PA3887 | 88  | 40  |
|         | 4354544 | 4355266 | +     | PA3888 | 11  | 6   |
| 4355266 | 4356201 | +       | -     | PA3889 | 8   | 7   |
|         | 4356876 | +       | -     | PA3890 | 13  | 11  |
|         | 4359075 | 4358167 | -     | PA3892 | 19  | 83  |
|         | 4361497 | 4359302 | -     | PA3893 | 16  | 66  |
|         | 4362984 | 4361494 | -     | PA3894 | 25  | 120 |
| 4363167 | 4363230 | 4364183 | +     | PA3895 | 35  | 35  |
|         | 4364278 | 4365255 | +     | PA3896 | 40  | 32  |
|         | 4366175 | 4365273 | -     | PA3897 | 10  | 6   |
|         | 4366301 | 4367182 | +     | PA3898 | 20  | 17  |
|         | 4367283 | 4367792 | +     | PA3899 | 13  | 9   |
| 4368813 | 4367789 | 4368742 | +     | PA3900 | 9   | 7   |
|         | 4368837 | 4371191 | +     | fecA   | 88  | 65  |
|         | 4371748 | 4371287 | -     | PA3902 | 79  | 57  |
|         | 4371969 | 4373552 | +     | prfC   | 250 | 214 |
|         | 4373938 | 4374333 | +     | PA3904 | 215 | 172 |
| 4374850 | 4374330 | 4374857 | +     | PA3905 | 152 | 135 |
|         | 4375230 | 4375233 | +     | PA3906 | 176 | 142 |
|         | 4376012 | 4376015 | +     | PA3907 | 155 | 126 |
|         | 4376731 | 4376731 | -     | PA3908 | 190 | 149 |
|         | 4379650 | 4377311 | -     | eddB   | 4   | 2   |
| 4382016 | 4381249 | 4379687 | -     | eddA   | 2   | 2   |
|         | 4382900 | 4381501 | -     | PA3911 | 12  | 29  |
|         | 4383907 | 4382010 | -     | PA3912 | 22  | 33  |
|         | 4385245 | 4382912 | -     | PA3913 | 51  | 54  |
|         | 4385799 | 4384022 | -     | moeA1  | 4   | 2   |
| 4385799 | 4385242 | -       | moaB1 | PA3915 | 6   | 6   |

|         |         |         |         |   |       |        |      |      |
|---------|---------|---------|---------|---|-------|--------|------|------|
| 4386352 | 4386352 | 4385900 | 4385800 | - | moaE  | PA3916 | 61   | 51   |
|         | 4386608 | 4386357 | 4386353 | - | moaD  | PA3917 | 93   | 57   |
| 4387104 | 4387087 | 4386605 | -       | - | moaC  | PA3918 | 114  | 72   |
|         | 4388727 | 4387336 | -       | - | -     | PA3919 | 26   | 11   |
|         | 4389231 | 4391609 | +       | + | -     | PA3920 | 5    | 3    |
|         | 4394361 | 4391641 | -       | - | -     | PA3921 | 18   | 15   |
|         | 4396061 | 4394694 | -       | - | -     | PA3922 | 8    | 4    |
| 4398047 | 4398047 | 4396122 | 4396122 | - | -     | PA3923 | 15   | 7    |
|         | 4399941 | 4398259 | -       | - | -     | PA3924 | 9    | 4    |
| 4400097 | 4400123 | 4401298 | 4401317 | + | -     | PA3925 | 62   | 78   |
|         | 4402536 | 4401355 | -       | - | -     | PA3926 | 8    | 6    |
|         | 4402638 | 4403426 | +       | + | -     | PA3927 | 19   | 5    |
|         | 4403877 | 4403707 | -       | - | -     | PA3928 | 26   | 16   |
|         | 4404898 | 4403891 | -       | - | cioB  | PA3929 | 25   | 11   |
|         | 4406368 | 4404902 | 4404902 | - | cioA  | PA3930 | 18   | 4    |
|         | 4406806 | 4407585 | +       | + | -     | PA3931 | 3    | 5    |
|         | 4407760 | 4408734 | +       | + | -     | PA3932 | 6    | 5    |
|         | 4408924 | 4410885 | 4410885 | + | -     | PA3933 | 17   | 10   |
| 4413038 | 4413029 | 4410993 | 4410886 | - | -     | PA3934 | 57   | 44   |
|         | 4414025 | 4413192 | -       | - | tauD  | PA3935 | 6    | 4    |
|         | 4414950 | 4414132 | -       | - | -     | PA3936 | 4    | 1    |
|         | 4415731 | 4414940 | -       | - | -     | PA3937 | 1    | 3    |
|         | 4416809 | 4415796 | -       | - | -     | PA3938 | 3    | 4    |
|         | 4417934 | 4417014 | -       | - | -     | PA3939 | 11   | 4    |
| 4418164 | 4418303 | 4418584 | 4418584 | + | -     | PA3940 | 2686 | 2047 |
|         | 4419304 | 4418708 | 4418647 | - | -     | PA3941 | 76   | 60   |
| 4420203 | 4420170 | 4419301 | -       | - | tesB  | PA3942 | 93   | 64   |
|         | 4421799 | 4420204 | -       | - | -     | PA3943 | 20   | 17   |
|         | 4422380 | 4421802 | -       | - | -     | PA3944 | 33   | 28   |
|         | 4422997 | 4422407 | 4422407 | - | -     | PA3945 | 29   | 15   |
|         | 4426850 | 4423212 | -       | - | rocS1 | PA3946 | 6    | 4    |
|         | 4428130 | 4426952 | -       | - | rocR  | PA3947 | 12   | 8    |

|         |         |         |           |       |        |     |     |
|---------|---------|---------|-----------|-------|--------|-----|-----|
| 4428282 | 4428412 | 4429041 | 4429041 + | roca1 | PA3948 | 132 | 82  |
| 4429042 | 4429401 | 4430576 | 4430598 + | -     | PA3949 | 66  | 55  |
| 4431948 | 4431948 | 4430599 | 4430599 - | -     | PA3950 | 114 | 94  |
| 4432540 | 4432529 | 4432026 | 4431949 - | -     | PA3951 | 75  | 60  |
|         | 4433170 | 4432595 | -         | -     | PA3952 | 34  | 27  |
|         | 4433411 | 4433992 | +         | -     | PA3953 | 9   | 5   |
|         | 4434150 | 4435244 | +         | -     | PA3954 | 3   | 3   |
| 4435327 | 4435328 | 4435984 | 4436041 + | -     | PA3955 | 41  | 37  |
|         | 4436051 | 4436485 | +         | -     | PA3956 | 53  | 22  |
|         | 4437328 | 4436492 | -         | -     | PA3957 | 12  | 6   |
| 4437373 | 4437390 | 4438529 | 4438569 + | -     | PA3958 | 47  | 30  |
| 4438602 | 4438619 | 4439353 | 4439353 + | -     | PA3959 | 15  | 31  |
| 4439354 | 4439377 | 4439784 | 4439794 + | -     | PA3960 | 18  | 40  |
| 4442376 | 4442311 | 4439795 | 4439795 - | -     | PA3961 | 51  | 44  |
| 4442453 | 4442453 | 4442869 | 4442884 + | -     | PA3962 | 79  | 60  |
|         | 4442958 | 4443854 | +         | -     | PA3963 | 20  | 16  |
|         | 4443811 | 4444596 | +         | -     | PA3964 | 6   | 4   |
| 4444950 | 4444978 | 4445487 | 4445594 + | -     | PA3965 | 53  | 40  |
| 4445618 | 4445689 | 4445898 | 4445898 + | -     | PA3966 | 513 | 451 |
| 4445946 | 4445999 | 4446391 | 4446391 + | -     | PA3967 | 173 | 153 |
| 4447062 | 4446994 | 4446425 | 4446392 - | -     | PA3968 | 63  | 50  |
|         | 4447133 | 4448218 | +         | -     | PA3969 | 30  | 19  |
| 4450446 | 4450392 | 4448893 | 4448219 - | amn   | PA3970 | 66  | 35  |
|         | 4450878 | 4450447 | -         | -     | PA3971 | 13  | 10  |
|         | 4452539 | 4450890 | -         | -     | PA3972 | 24  | 17  |
| 4453183 | 4453183 | 4452536 | -         | -     | PA3973 | 40  | 13  |
|         | 4455676 | 4453289 | -         | lads  | PA3974 | 37  | 30  |
| 4455887 | 4455887 | 4456684 | 4456691 + | thiD  | PA3975 | 155 | 135 |
| 4456695 | 4456695 | 4457324 | 4457325 + | thie  | PA3976 | 96  | 70  |
| 4457335 | 4457362 | 4458645 | 4458645 + | hemL  | PA3977 | 225 | 196 |
| 4458806 | 4458854 | 4459402 | 4459402 + | -     | PA3978 | 236 | 189 |
| 4459762 | 4459750 | 4459418 | 4459403 - | -     | PA3979 | 185 | 213 |

|         |         |         |         |   |       |              |     |     |
|---------|---------|---------|---------|---|-------|--------------|-----|-----|
| 4459868 | 4459879 | 4461219 | 4461375 | + | -     | PA3980       | 234 | 213 |
| 4461380 | 4461388 | 4462410 |         | + | -     | PA3981       | 330 | 240 |
|         | 4462400 | 4462882 |         | + | -     | PA3982       | 230 | 232 |
|         | 4462879 | 4463718 | 4463720 | + | -     | PA3983       | 246 | 280 |
| 4463816 | 4463904 | 4465439 | 4465455 | + | Int   | PA3984       | 98  | 95  |
| 4466250 | 4466250 | 4465489 |         | - | -     | PA3985       | 39  | 26  |
|         | 4466754 | 4466323 |         | - | -     | PA3986       | 13  | 9   |
| 4466911 | 4466925 | 4469546 | 4469608 | + | leus  | PA3987       | 417 | 303 |
| 4469609 | 4469613 | 4470236 | 4470236 | + | -     | PA3988       | 291 | 245 |
| 4470237 | 4470274 | 4471311 | 4471311 | + | holA  | PA3989       | 108 | 104 |
| 4471312 | 4471403 | 4471555 | 4471626 | + | -     | PA3990       | 24  | 45  |
|         | 4472198 | 4471671 |         | - | -     | PA3991       | 15  | 11  |
|         | 4472131 | 4473477 | 4473622 | + | -     | PA3992       | 81  | 49  |
| 4473623 | 4473623 | 4474639 |         | + | -     | PA3993       | 40  | 36  |
|         | 4475849 | 4474959 |         | - | -     | PA3994       | 4   | 3   |
|         | 4475955 | 4476848 |         | + | -     | PA3995       | 22  | 18  |
|         | 4477977 | 4476994 | 4476990 | - | lis   | PA3996       | 303 | 326 |
|         | 4478627 | 4477974 |         | - | lipB  | PA3997       | 284 | 307 |
| 4478978 | 4478908 | 4478627 |         | - | -     | PA3998       | 508 | 476 |
| 4480179 | 4480139 | 4478979 | 4478979 | - | dacC  | PA3999       | 519 | 492 |
| 4480187 |         |         | 4480204 | ? | -     | predicted RN | 486 | 468 |
|         | 4481233 | 4480205 | 4480205 | - | -     | PA4000       | 228 | 225 |
| 4482260 | 4482252 | 4481230 |         | - | sltB1 | PA4001       | 156 | 168 |
| 4483365 | 4483364 | 4482261 | 4482261 | - | rodA  | PA4002       | 108 | 104 |
| 4485336 | 4485336 | 4483396 | 4483396 | - | pbpA  | PA4003       | 83  | 71  |
| 4485823 | 4485816 | 4485349 | 4485337 | - | -     | PA4004       | 154 | 131 |
| 4486180 | 4486180 | 4485824 | 4485824 | - | -     | PA4005       | 416 | 350 |
|         | 4486847 | 4486203 | 4486181 | - | nadD  | PA4006       | 227 | 197 |
| 4488112 | 4488112 | 4486847 |         | - | proA  | PA4007       | 224 | 195 |
|         | 4488410 | 4489633 |         | + | -     | PA4008       | 9   | 3   |
|         | 4490498 | 4489641 |         | - | -     | PA4009       | 10  | 8   |
| 4490540 | 4490562 | 4491281 |         | + | -     | PA4010       | 102 | 108 |

|         |         |         |         |   |      |        |      |      |
|---------|---------|---------|---------|---|------|--------|------|------|
| 4493214 | 4491278 | 4492591 | 4492591 | + | -    | PA4011 | 82   | 72   |
|         | 4493195 | 4492602 | 4492592 | - | -    | PA4012 | 116  | 92   |
|         | 4493925 | 4493215 | 4493215 | - | -    | PA4013 | 81   | 59   |
| 4494403 | 4494335 | 4493925 |         | - | -    | PA4014 | 69   | 53   |
|         | 4494481 | 4494936 |         | + | -    | PA4015 | 53   | 29   |
|         | 4495126 | 4496865 | 4496865 | + | -    | PA4016 | 34   | 23   |
| 4496876 | 4496912 | 4497553 | 4497553 | + | -    | PA4017 | 53   | 41   |
| 4497848 | 4497848 | 4497573 | 4497559 | - | -    | PA4018 | 77   | 59   |
| 4498487 | 4498479 | 4497850 | 4497849 | - | -    | PA4019 | 82   | 60   |
| 449864  | 4498483 | 4498488 | 4498488 | - | mpl  | PA4020 | 110  | 85   |
|         | 4501932 | 4500001 | 4500001 | - | -    | PA4021 | 33   | 29   |
| 4502229 | 4502271 | 4503791 | 4503791 | + | -    | PA4022 | 57   | 234  |
| 4503792 | 4504001 | 4505449 | 4505507 | + | -    | PA4023 | 14   | 32   |
| 4505508 | 4505508 | 4506902 | 4506912 | + | eutB | PA4024 | 20   | 49   |
| 4506913 | 4506913 | 4507734 | 4507852 | + | -    | PA4025 | 18   | 34   |
| 4507864 | 4507897 | 4508358 | 4508407 | + | -    | PA4026 | 128  | 63   |
|         | 4508408 | 4509301 |         | + | -    | PA4027 | 14   | 11   |
|         | 4509776 | 4509997 |         | + | -    | PA4028 | 2    | 4    |
| 4510948 | 4510971 | 4511636 | 4511636 | + | -    | PA4029 | 106  | 110  |
| 4511637 | 4511639 | 4512469 | 4512534 | + | -    | PA4030 | 62   | 51   |
| 4512536 | 4512549 | 4513076 | 4513076 | + | ppa  | PA4031 | 1462 | 1078 |
| 4513939 | 4513884 | 4513168 | 4513077 | - | -    | PA4032 | 69   | 83   |
|         | 4514079 | 4514348 |         | + | -    | PA4033 | 13   | 5    |
|         | 4514695 | 4515384 |         | + | aqpZ | PA4034 | 12   | 5    |
|         | 4515550 | 4516551 |         | + | -    | PA4035 | 45   | 25   |
|         | 4516570 | 4518870 |         | + | -    | PA4036 | 13   | 10   |
|         | 4519275 | 4520201 |         | + | -    | PA4037 | 4    | 3    |
|         | 4520198 | 4520932 |         | + | -    | PA4038 | 5    | 2    |
|         | 4520942 | 4522744 |         | + | -    | PA4039 | 7    | 3    |
|         | 4522746 | 4523753 |         | + | -    | PA4040 | 9    | 4    |
|         | 4525154 | 4523985 |         | - | -    | PA4041 | 7    | 1    |
| 4525309 | 4525312 | 4525554 |         | + | xseB | PA4042 | 199  | 146  |

|         |         |         |           |      |              |      |      |
|---------|---------|---------|-----------|------|--------------|------|------|
| 4526540 | 4525551 | 4526438 | 4526537 + | isPA | PA4043       | 99   | 71   |
|         | 4526547 | 4528430 | 4528432 + | dxs  | PA4044       | 252  | 201  |
|         | 4529579 | 4528782 | 4528443 - | -    | PA4045       | 74   | 58   |
|         | 4529998 | 4529579 | -         | -    | PA4046       | 150  | 130  |
| 4530615 | 4530612 | 4529995 | -         | ribA | PA4047       | 256  | 217  |
| 4531387 | 4531387 | 4530743 | 4530618 - | -    | PA4048       | 70   | 47   |
| 4532136 | 4532136 | 4531390 | 4531388 - | -    | PA4049       | 64   | 64   |
|         | 4532660 | 4532145 | 4532137 - | pgpA | PA4050       | 126  | 145  |
| 4533639 | 4533621 | 4532653 | -         | thil | PA4051       | 158  | 156  |
|         | 4534119 | 4533640 | -         | nusB | PA4052       | 541  | 493  |
| 4534688 | 4534592 | 4534116 | -         | ribE | PA4053       | 645  | 643  |
| 4534689 |         |         | 4534701 ? | -    | predicted RN | 421  | 443  |
| 4535807 | 4535807 | 4534710 | 4534705 - | ribB | PA4054       | 152  | 208  |
| 4536839 | 4536493 | 4535834 | 4535808 - | ribC | PA4055       | 161  | 234  |
|         | 4538042 | 4536921 | 4536844 - | ribD | PA4056       | 106  | 83   |
| 4538507 | 4538503 | 4538039 | -         | nrdR | PA4057       | 170  | 126  |
| 4538684 | 4538689 | 4539159 | +         | -    | PA4058       | 82   | 84   |
|         | 4539156 | 4539533 | 4539533 + | -    | PA4059       | 65   | 57   |
| 4539534 | 4539539 | 4539817 | 4539877 + | -    | PA4060       | 48   | 51   |
| 4539885 | 4539889 | 4540758 | 4540758 + | -    | PA4061       | 210  | 166  |
| 4541139 | 4541139 | 4540783 | 4540760 - | -    | PA4062       | 48   | 27   |
|         | 4541272 | 4541862 | +         | -    | PA4063       | 11   | 10   |
|         | 4541951 | 4542655 | +         | -    | PA4064       | 16   | 7    |
|         | 4542658 | 4543923 | +         | -    | PA4065       | 17   | 10   |
|         | 4543941 | 4544459 | +         | -    | PA4066       | 29   | 22   |
| 4544599 | 4544607 | 4545305 | 4545305 + | oprG | PA4067       | 2816 | 4274 |
| 4545306 |         |         | 4545319 ? | -    | predicted RN | 391  | 850  |
|         | 4546675 | 4545746 | 4545381 - | -    | PA4068       | 139  | 102  |
| 4547698 | 4547552 | 4546668 | -         | -    | PA4069       | 183  | 114  |
|         | 4548771 | 4547821 | -         | -    | PA4070       | 11   | 5    |
|         | 4549510 | 4548932 | -         | -    | PA4071       | 0    | 1    |
|         | 4550975 | 4549485 | -         | -    | PA4072       | 6    | 2    |

|         |         |         |   |         |        |     |    |
|---------|---------|---------|---|---------|--------|-----|----|
| 4554462 | 4552630 | 4551143 | - | -       | PA4073 | 5   | 2  |
|         | 4552859 | 4553527 | + | -       | PA4074 | 15  | 9  |
|         | 4554360 | 4553524 | - | -       | PA4075 | 23  | 14 |
|         | 4554467 | 4554841 | + | -       | PA4076 | 49  | 46 |
|         | 4554838 | 4555044 | + | -       | PA4077 | 33  | 26 |
| 4558299 | 4555254 | 4558229 | + | -       | PA4078 | 5   | 2  |
|         | 4558302 | 4558991 | + | 4559005 | PA4079 | 127 | 80 |
|         | 4559650 | 4559006 | - | -       | PA4080 | 50  | 33 |
|         | 4561440 | 4560295 | - | cupB6   | PA4081 | 6   | 3  |
|         | 4564596 | 4561540 | - | cupB5   | PA4082 | 4   | 3  |
| 4573276 | 4565424 | 4564684 | - | cupB4   | PA4083 | 1   | 0  |
|         | 4567955 | 4565421 | - | cupB3   | PA4084 | 2   | 0  |
|         | 4569023 | 4568277 | - | cupB2   | PA4085 | 4   | 1  |
|         | 4569623 | 4569054 | - | cupB1   | PA4086 | 11  | 12 |
|         | 4570096 | 4570920 | + | -       | PA4087 | 0   | 0  |
| 4573276 | 4570929 | 4572314 | + | -       | PA4088 | 0   | 1  |
|         | 4572311 | 4573072 | + | -       | PA4089 | 2   | 1  |
|         | 4573285 | 4573575 | + | 4573576 | PA4090 | 97  | 46 |
|         | 4573741 | 4575303 | + | hpaA    | PA4091 | 5   | 4  |
|         | 4575332 | 4575844 | + | hpaC    | PA4092 | 7   | 7  |
| 4573276 | 4576324 | 4575908 | - | -       | PA4093 | 7   | 9  |
|         | 4577331 | 4576372 | - | -       | PA4094 | 31  | 19 |
|         | 4577650 | 4578183 | + | -       | PA4095 | 1   | 1  |
|         | 4578254 | 4579513 | + | -       | PA4096 | 1   | 0  |
|         | 4579510 | 4580568 | + | -       | PA4097 | 1   | 2  |
| 4573276 | 4580583 | 4581308 | + | -       | PA4098 | 5   | 3  |
|         | 4581393 | 4582697 | + | -       | PA4099 | 1   | 0  |
|         | 4582852 | 4584531 | + | -       | PA4100 | 3   | 1  |
|         | 4585149 | 4585889 | + | bfrmR   | PA4101 | 16  | 8  |
|         | 4585886 | 4587190 | + | bfrms   | PA4102 | 9   | 5  |
| 4573276 | 4587320 | 4587949 | + | -       | PA4103 | 3   | 3  |
|         | 4587981 | 4588490 | + | -       | PA4104 | 3   | 3  |

|         |         |         |         |         |        |        |    |    |
|---------|---------|---------|---------|---------|--------|--------|----|----|
| 4602178 | 4589498 | 4588743 | -       | -       | PA4105 | 2      | 1  |    |
|         | 4590321 | 4589491 | -       | -       | PA4106 | 3      | 1  |    |
|         | 4590863 | 4590396 | -       | -       | PA4107 | 2      | 2  |    |
|         | 4591187 | 4592431 | +       | -       | PA4108 | 26     | 5  |    |
|         | 4593880 | 4592990 | -       | ampr    | PA4109 | 30     | 27 |    |
|         | 4594029 | 4595222 | +       | ampc    | PA4110 | 9      | 9  |    |
|         | 4595287 | 4595685 | +       | -       | PA4111 | 35     | 14 |    |
|         | 4600102 | 4595849 | -       | -       | PA4112 | 11     | 10 |    |
|         | 4601420 | 4600230 | -       | -       | PA4113 | 28     | 26 |    |
|         | 4602178 | 4602083 | 4601574 | 4601421 | -      | PA4114 | 68 | 41 |
| 4602364 | 4602503 | 4603888 | 4603897 | +       | PA4115 | 100    | 39 |    |
| 4604006 | 4604006 | 4604593 | +       | bpho    | PA4116 | 58     | 35 |    |
| 4604594 | 4604621 | 4606807 | 4606870 | +       | bphp   | PA4117 | 62 | 40 |
| 4606877 | 4606885 | 4607454 | 4607495 | +       | PA4118 | 82     | 61 |    |
|         | 4608384 | 4607578 | -       | aph     | PA4119 | 42     | 27 |    |
|         | 4609347 | 4608436 | -       | -       | PA4120 | 8      | 5  |    |
|         | 4609567 | 4610226 | +       | -       | PA4121 | 4      | 2  |    |
|         | 4610237 | 4611016 | +       | -       | PA4122 | 6      | 3  |    |
|         | 4611013 | 4612473 | +       | hpc     | PA4123 | 5      | 2  |    |
|         | 4612605 | 4613528 | +       | hpcb    | PA4124 | 11     | 5  |    |
|         | 4613539 | 4613931 | +       | hpcd    | PA4125 | 8      | 7  |    |
|         | 4614024 | 4615328 | +       | -       | PA4126 | 3      | 1  |    |
|         | 4615346 | 4616149 | +       | hpcg    | PA4127 | 5      | 5  |    |
| 4619314 | 4616162 | 4616968 | +       | -       | PA4128 | 3      | 2  |    |
|         | 4617538 | 4617050 | -       | -       | PA4129 | 12     | 10 |    |
|         | 4619208 | 4617535 | -       | -       | PA4130 | 10     | 7  |    |
|         | 4619314 | 4621035 | +       | -       | PA4131 | 9      | 3  |    |
|         | 4621133 | 4622548 | +       | -       | PA4132 | 23     | 12 |    |
|         | 4622812 | 4624239 | +       | -       | PA4133 | 36     | 61 |    |
|         | 4624323 | 4624565 | +       | -       | PA4134 | 22     | 20 |    |
|         | 4625003 | 4624581 | -       | -       | PA4135 | 88     | 85 |    |
|         | 4626297 | 4625089 | -       | -       | PA4136 | 13     | 10 |    |

|         |         |         |   |      |        |     |    |
|---------|---------|---------|---|------|--------|-----|----|
| 4632452 | 4626662 | 4627918 | + | -    | PA4137 | 8   | 10 |
|         | 4629185 | 4627947 | - | tyrS | PA4138 | 28  | 33 |
|         | 4629944 | 4630243 | + | -    | PA4139 | 27  | 21 |
|         | 4630375 | 4632168 | + | -    | PA4140 | 4   | 2  |
|         | 4632477 | 4632776 | + | -    | PA4141 | 107 | 57 |
|         | 4632873 | 4634129 | + | -    | PA4142 | 5   | 2  |
|         | 4634139 | 4636298 | + | -    | PA4143 | 3   | 1  |
|         | 4636298 | 4637713 | + | -    | PA4144 | 3   | 2  |
|         | 4637809 | 4638699 | + | -    | PA4145 | 32  | 17 |
|         | 4638887 | 4639291 | + | -    | PA4146 | 11  | 6  |
|         | 4641379 | 4639502 | - | acOR | PA4147 | 11  | 15 |
|         | 4641711 | 4642511 | + | -    | PA4148 | 5   | 3  |
|         | 4642508 | 4643548 | + | -    | PA4149 | 12  | 7  |
|         | 4643571 | 4644545 | + | -    | PA4150 | 10  | 5  |
|         | 4644578 | 4645597 | + | acOB | PA4151 | 6   | 4  |
| 4652630 | 4645594 | 4646706 | + | -    | PA4152 | 2   | 3  |
|         | 4646720 | 4647811 | + | -    | PA4153 | 7   | 5  |
|         | 4648563 | 4647895 | - | -    | PA4154 | 19  | 15 |
|         | 4650306 | 4648999 | - | -    | PA4155 | 3   | 1  |
|         | 4652458 | 4650374 | - | -    | PA4156 | 2   | 2  |
|         | 4652714 | 4653502 | + | -    | PA4157 | 39  | 43 |
|         | 4654306 | 4653509 | - | fePC | PA4158 | 13  | 10 |
|         | 4654432 | 4655337 | + | fePB | PA4159 | 3   | 2  |
|         | 4655368 | 4656390 | + | fePD | PA4160 | 4   | 4  |
|         | 4656387 | 4657418 | + | fePG | PA4161 | 7   | 5  |
| 4658351 | 4658145 | 4657429 | - | -    | PA4162 | 11  | 6  |
|         | 4658450 | 4660159 | + | -    | PA4163 | 87  | 73 |
|         | 4660161 | 4660547 | + | -    | PA4164 | 68  | 53 |
|         | 4662053 | 4660563 | - | -    | PA4165 | 24  | 15 |
|         | 4662185 | 4662643 | + | -    | PA4166 | 11  | 4  |
|         | 4663511 | 4662693 | - | -    | PA4167 | 5   | 3  |
|         | 4663854 | 4666262 | + | fpvB | PA4168 | 12  | 6  |

|         |         |         |   |       |        |     |    |
|---------|---------|---------|---|-------|--------|-----|----|
| 4673322 | 4666755 | 4666327 | - | -     | PA4169 | 22  | 17 |
|         | 4666836 | 4667768 | + | -     | PA4170 | 12  | 7  |
|         | 4667904 | 4668467 | + | -     | PA4171 | 5   | 4  |
|         | 4668490 | 4669290 | + | -     | PA4172 | 1   | 1  |
|         | 4669720 | 4669322 | - | -     | PA4173 | 0   | 0  |
|         | 4669861 | 4670784 | + | -     | PA4174 | 18  | 10 |
|         | 4671319 | 4672707 | + | piv   | PA4175 | 52  | 18 |
|         | 4673319 | 4673038 | - | ppic2 | PA4176 | 174 | 84 |
|         | 4673462 | 4673863 | + | -     | PA4177 | 7   | 6  |
|         | 4673963 | 4674706 | + | -     | PA4178 | 15  | 13 |
|         | 4674944 | 4676239 | + | -     | PA4179 | 94  | 6  |
|         | 4677925 | 4676282 | - | -     | PA4180 | 52  | 23 |
|         | 4678210 | 4678929 | + | -     | PA4181 | 15  | 9  |
|         | 4678957 | 4679595 | + | -     | PA4182 | 24  | 19 |
|         | 4680066 | 4679599 | - | -     | PA4183 | 27  | 20 |
|         | 4681114 | 4680092 | - | -     | PA4184 | 19  | 22 |
|         | 4681421 | 4682149 | + | -     | PA4185 | 33  | 26 |
|         | 4682242 | 4683561 | + | -     | PA4186 | 27  | 18 |
|         | 4683697 | 4685025 | + | -     | PA4187 | 4   | 4  |
|         | 4685090 | 4686001 | + | -     | PA4188 | 3   | 3  |
| 4687621 | 4685994 | 4687484 | + | -     | PA4189 | 3   | 2  |
|         | 4687652 | 4688848 | + | pqsl  | PA4190 | 49  | 30 |
|         | 4689893 | 4688889 | - | -     | PA4191 | 14  | 9  |
|         | 4690645 | 4689902 | - | -     | PA4192 | 6   | 6  |
|         | 4691346 | 4690642 | - | -     | PA4193 | 4   | 5  |
|         | 4692041 | 4691343 | - | -     | PA4194 | 7   | 4  |
|         | 4692956 | 4692126 | - | -     | PA4195 | 12  | 9  |
|         | 4693756 | 4693112 | - | bfir  | PA4196 | 25  | 28 |
|         | 4696035 | 4693759 | - | bfls  | PA4197 | 23  | 18 |
|         | 4696281 | 4697903 | + | -     | PA4198 | 39  | 22 |
| 4692993 | 4698021 | 4699802 | + | -     | PA4199 | 37  | 23 |
|         | 4700000 | 4700866 | + | -     | PA4200 | 31  | 27 |

|         |         |         |         |   |       |        |     |     |
|---------|---------|---------|---------|---|-------|--------|-----|-----|
| 4701964 | 4701946 | 4700906 | 4700867 | - | ddlA  | PA4201 | 69  | 38  |
| 4703130 | 4703097 | 4702042 | 4702026 | - | -     | PA4202 | 52  | 36  |
|         | 4703205 | 4704059 |         | + | -     | PA4203 | 18  | 14  |
|         | 4704139 | 4705305 |         | + | ppgI  | PA4204 | 15  | 10  |
|         | 4705956 | 4706402 |         | + | mexG  | PA4205 | 14  | 25  |
|         | 4706410 | 4707522 |         | + | mexH  | PA4206 | 6   | 13  |
|         | 4707535 | 4710624 |         | + | mexI  | PA4207 | 8   | 11  |
|         | 4710621 | 4712084 |         | + | opmD  | PA4208 | 7   | 9   |
|         | 4713099 | 4712095 |         | - | phzM  | PA4209 | 6   | 4   |
|         | 4713796 | 4714284 |         | + | phzA1 | PA4210 | 3   | 0   |
|         | 4714314 | 4714802 |         | + | phzB1 | PA4211 | 5   | 2   |
|         | 4714826 | 4716043 |         | + | phzC1 | PA4212 | 10  | 12  |
|         | 4716040 | 4716663 |         | + | phzD1 | PA4213 | 2   | 2   |
|         | 4716660 | 4718543 |         | + | phzE1 | PA4214 | 4   | 1   |
|         | 4718557 | 4719393 |         | + | phzF1 | PA4215 | 2   | 2   |
|         | 4719419 | 4720063 |         | + | phzG1 | PA4216 | 8   | 5   |
|         | 4720301 | 4721509 |         | + | phzS  | PA4217 | 11  | 4   |
|         | 4722858 | 4721614 |         | - | -     | PA4218 | 1   | 1   |
|         | 4724035 | 4722851 |         | - | -     | PA4219 | 1   | 0   |
|         | 4724639 | 4724358 |         | - | -     | PA4220 | 2   | 1   |
|         | 4726801 | 4724639 |         | - | ftpA  | PA4221 | 5   | 5   |
|         | 4728617 | 4726893 |         | - | -     | PA4222 | 5   | 3   |
|         | 4730326 | 4728614 |         | - | -     | PA4223 | 3   | 2   |
|         | 4731372 | 4730323 |         | - | pchG  | PA4224 | 2   | 1   |
|         | 4736798 | 4731369 |         | - | pchF  | PA4225 | 3   | 2   |
|         | 4741111 | 4736795 |         | - | pchE  | PA4226 | 3   | 2   |
|         | 4742195 | 4741305 |         | - | pchR  | PA4227 | 13  | 14  |
|         | 4742424 | 4744067 |         | + | pchD  | PA4228 | 3   | 2   |
|         | 4744064 | 4744819 |         | + | pchC  | PA4229 | 1   | 1   |
|         | 4744819 | 4745124 |         | + | pchB  | PA4230 | 2   | 2   |
|         | 4745121 | 4746551 |         | + | pchA  | PA4231 | 9   | 9   |
| 4747153 | 4747137 | 4746640 | 4746635 | - | ssb   | PA4232 | 802 | 544 |

|         |         |         |           |      |              |       |       |
|---------|---------|---------|-----------|------|--------------|-------|-------|
| 4748545 | 4748542 | 4747154 | 4747154 - | -    | PA4233       | 116   | 110   |
| 4748751 | 4748756 | 4751593 | 4751593 + | uvrA | PA4234       | 199   | 157   |
| 4752134 | 4752129 | 4751665 | 4751664 - | bfrA | PA4235       | 294   | 199   |
| 4753751 | 4753708 | 4752260 | 4752243 - | kata | PA4236       | 156   | 137   |
| 4754379 | 4754379 | 4753990 | 4753966 - | rpIQ | PA4237       | 6582  | 5485  |
| 4755424 | 4755424 | 4754423 | 4754380 - | rpoA | PA4238       | 7554  | 6423  |
| 4756072 | 4756067 | 4755447 | 4755425 - | rpsD | PA4239       | 8174  | 6731  |
| 4756473 | 4756473 | 4756084 | 4756073 - | rpsK | PA4240       | 6916  | 5815  |
| 4756474 |         |         | 4756488 ? | -    | predicted RN | 8357  | 7187  |
| 4756969 | 4756848 | 4756492 | 4756489 - | rpsM | PA4241       | 8770  | 7885  |
| 4757123 | 4757095 | 4756979 | 4756972 - | rpmJ | PA4242       | 9320  | 8148  |
|         | 4758452 | 4757124 | 4757124 - | secY | PA4243       | 8222  | 7229  |
| 4758887 | 4758887 | 4758453 | -         | rplO | PA4244       | 10999 | 8815  |
| 4759067 | 4759067 | 4758891 | 4758889 - | rpmD | PA4245       | 13969 | 11260 |
| 4759573 | 4759570 | 4759070 | 4759068 - | rpse | PA4246       | 11552 | 9228  |
| 4759924 | 4759924 | 4759574 | 4759574 - | rplR | PA4247       | 9575  | 7704  |
| 4760468 | 4760468 | 4759935 | 4759925 - | rplF | PA4248       | 10499 | 9114  |
| 4760888 | 4760872 | 4760480 | 4760469 - | rpsH | PA4249       | 12265 | 11514 |
| 4760889 |         |         | 4760911 ? | -    | predicted RN | 10529 | 9663  |
| 4761367 | 4761367 | 4761062 | 4760912 - | rpsN | PA4250       | 7878  | 6867  |
| 4761920 | 4761920 | 4761381 | 4761368 - | rplE | PA4251       | 11644 | 9627  |
| 4762254 | 4762254 | 4761940 | 4761921 - | rplX | PA4252       | 10999 | 8794  |
| 4762635 | 4762635 | 4762267 | 4762255 - | rplN | PA4253       | 10689 | 8521  |
| 4762927 | 4762925 | 4762659 | 4762636 - | rpsQ | PA4254       | 10518 | 8546  |
|         | 4763119 | 4762928 | 4762928 - | rpmC | PA4255       | 9247  | 7602  |
| 4763537 | 4763532 | 4763119 | -         | rplP | PA4256       | 11277 | 8999  |
| 4764242 | 4764230 | 4763544 | 4763538 - | rpsc | PA4257       | 10750 | 8686  |
| 4764587 | 4764575 | 4764243 | 4764243 - | rplV | PA4258       | 10121 | 8138  |
| 4764879 | 4764863 | 4764588 | 4764588 - | rpsS | PA4259       | 11100 | 8790  |
| 4765701 | 4765701 | 4764880 | 4764880 - | rplB | PA4260       | 9154  | 7530  |
|         | 4766012 | 4765713 | 4765702 - | rplW | PA4261       | 11038 | 9330  |
| 4766611 | 4766611 | 4766009 | -         | rplD | PA4262       | 11809 | 9962  |

|         |         |           |           |       |              |       |       |
|---------|---------|-----------|-----------|-------|--------------|-------|-------|
| 4767271 | 4767260 | 4766625   | 4766619 - | rpIC  | PA4263       | 11230 | 10084 |
| 4767724 | 4767654 | 4767343   | 4767272 - | rpsJ  | PA4264       | 16053 | 13801 |
| 4769034 | 4769004 | 4767811   | 4767785 - | tufA  | PA4265       | 12500 | 9552  |
| 4771155 | 4771155 | 4769035   | 4769035 - | fusA1 | PA4266       | 10244 | 8356  |
| 4771707 | 4771656 | 4771186   | 4771165 - | rpsG  | PA4267       | 10891 | 9022  |
| 4771708 |         | 4771724 ? | 4771724 ? | -     | predicted RN | 11734 | 9561  |
| 4772141 | 4772127 | 4771756   | 4771725 - | rpsL  | PA4268       | 10548 | 8916  |
| 4776478 | 4776478 | 4772279   | 4772149 - | rpoc  | PA4269       | 2645  | 2415  |
| 4780767 | 4780617 | 4776544   | 4776479 - | rpob  | PA4270       | 2249  | 2118  |
| 4780833 |         |           | 4780768 - | -     | PA4270.1     | 6019  | 5830  |
| 4781234 | 4781207 | 4780839   | 4780834 - | rplL  | PA4271       | 17692 | 15491 |
|         | 4781786 | 4781286   | 4781242 - | rplJ  | PA4272       | 16722 | 15119 |
| 4781786 |         |           | 4781978 + | -     | PA4272.1     | 12466 | 10951 |
|         | 4782680 | 4781985   | 4781979 - | rplA  | PA4273       | 8424  | 7239  |
| 4783140 | 4783111 | 4782680   | -         | rplK  | PA4274       | 10958 | 9352  |
| 4783761 | 4783761 | 4783228   | 4783141 - | nusG  | PA4275       | 2967  | 2996  |
| 4784183 | 4784139 | 4783771   | 4783762 - | sece  | PA4276       | 3274  | 3601  |
| 4784259 |         |           | 4784184 - | -     | PA4276.1     | 2313  | 2427  |
| 4785592 | 4785509 | 4784316   | 4784260 - | tufB  | PA4277       | 10587 | 8292  |
| 4785668 |         |           | 4785593 - | -     | PA4277.1     | 1913  | 3202  |
| 4785761 |         |           | 4785688 - | -     | PA4277.2     | 2366  | 5004  |
| 4785872 |         |           | 4785788 - | -     | PA4277.3     | 2597  | 6226  |
| 4786725 | 4786725 | 4786021   | 4785873 - | -     | PA4278       | 80    | 67    |
|         | 4787480 | 4786734   | 4786726 - | -     | PA4279       | 73    | 67    |
| 4788420 | 4788415 | 4787477   | -         | birA  | PA4280       | 131   | 120   |
| 4788693 |         |           | 4788574 - | -     | PA4280.1     | 3     | 8     |
| 4791724 |         |           | 4788836 - | -     | PA4280.2     | 54    | 52    |
| 4792026 |         |           | 4791951 - | -     | PA4280.3     | 1251  | 1128  |
| 4792131 |         |           | 4792055 - | -     | PA4280.4     | 1630  | 1780  |
| 4793731 |         |           | 4792196 - | -     | PA4280.5     | 52    | 53    |
|         | 4794404 | 4795633   | +         | sbcD  | PA4281       | 33    | 24    |
| 4795634 | 4795642 | 4799277   | 4799298 + | -     | PA4282       | 36    | 35    |

|         |         |         |         |   |       |        |     |     |
|---------|---------|---------|---------|---|-------|--------|-----|-----|
| 4801464 | 4801464 | 4799299 | 4799299 | - | recD  | PA4283 | 48  | 48  |
|         | 4805198 | 4801461 |         | - | recB  | PA4284 | 54  | 57  |
|         | 4808710 | 4805195 |         | - | recC  | PA4285 | 60  | 77  |
|         | 4809434 | 4808751 | 4808711 | - | -     | PA4286 | 82  | 99  |
|         | 4810437 | 4809547 |         | - | -     | PA4287 | 6   | 6   |
| 4810538 | 4810538 | 4811341 |         | + | -     | PA4288 | 11  | 7   |
|         | 4811396 | 4812601 |         | + | -     | PA4289 | 24  | 6   |
|         | 4814214 | 4812598 |         | - | -     | PA4290 | 72  | 3   |
|         | 4814213 | 4814899 | 4814899 | + | -     | PA4291 | 69  | 125 |
|         | 4815043 | 4816512 | 4816512 | + | -     | PA4292 | 155 | 191 |
| 4819348 | 4819348 | 4816580 |         | - | pprA  | PA4293 | 3   | 3   |
|         | 4819864 | 4819358 |         | - | -     | PA4294 | 5   | 1   |
|         | 4819928 | 4820410 |         | + | fpbA  | PA4295 | 6   | 3   |
|         | 4820532 | 4821359 | 4821384 | + | pprB  | PA4296 | 34  | 32  |
|         | 4823055 | 4821385 |         | - | tadG  | PA4297 | 10  | 6   |
| 4823364 | 4823364 | 4823080 |         | - | -     | PA4298 | 2   | 0   |
|         | 4824124 | 4823387 |         | - | tadD  | PA4299 | 4   | 1   |
|         | 4825032 | 4824121 |         | - | tadC  | PA4300 | 2   | 2   |
|         | 4825926 | 4825042 |         | - | tadB  | PA4301 | 4   | 3   |
|         | 4827188 | 4825923 |         | - | tadA  | PA4302 | 4   | 3   |
| 4828369 | 4828369 | 4827185 |         | - | tadZ  | PA4303 | 9   | 7   |
|         | 4829629 | 4828379 |         | - | rcpA  | PA4304 | 5   | 4   |
|         | 4830554 | 4829643 |         | - | rcpC  | PA4305 | 7   | 3   |
|         | 4830964 | 4831182 |         | + | flp   | PA4306 | 23  | 8   |
|         | 4831372 | 4833270 | 4833331 | + | pctC  | PA4307 | 164 | 112 |
| 4834864 | 4834864 | 4833374 | 4833366 | - | -     | PA4308 | 40  | 32  |
|         | 4835264 | 4837153 | 4837207 | + | pctA  | PA4309 | 45  | 50  |
|         | 4837390 | 4839279 | 4839280 | + | pctB  | PA4310 | 148 | 153 |
|         | 4839597 | 4840712 |         | + | -     | PA4311 | 10  | 7   |
|         | 4840705 | 4841466 |         | + | -     | PA4312 | 40  | 52  |
| 4841463 | 4841463 | 4842464 | 4842518 | + | -     | PA4313 | 61  | 75  |
|         | 4843552 | 4842701 | 4842647 | - | purU1 | PA4314 | 485 | 548 |

|         |         |         |           |      |        |      |      |
|---------|---------|---------|-----------|------|--------|------|------|
| 4843778 | 4843812 | 4844186 | 4844186 + | mvaT | PA4315 | 1848 | 1668 |
| 4845718 | 4845713 | 4844271 | 4844187 - | sbCB | PA4316 | 72   | 53   |
| 4845915 | 4845938 | 4846675 | 4846675 + | -    | PA4317 | 381  | 430  |
| 4846676 | 4846713 | 4847510 | +         | -    | PA4318 | 126  | 164  |
|         | 4847507 | 4848487 | +         | -    | PA4319 | 74   | 85   |
|         | 4848474 | 4850045 | +         | -    | PA4320 | 76   | 84   |
|         | 4850042 | 4851313 | +         | -    | PA4321 | 54   | 64   |
|         | 4851310 | 4852317 | +         | -    | PA4322 | 143  | 166  |
|         | 4852314 | 4853645 | 4853645 + | -    | PA4323 | 81   | 87   |
| 4854009 | 4854009 | 4853650 | 4853646 - | -    | PA4324 | 110  | 97   |
| 4854492 | 4854492 | 4854070 | 4854020 - | -    | PA4325 | 64   | 57   |
| 4854978 | 4854978 | 4854595 | 4854493 - | -    | PA4326 | 39   | 31   |
|         | 4855072 | 4855878 | +         | -    | PA4327 | 16   | 13   |
| 4855948 | 4855963 | 4856877 | 4856959 + | -    | PA4328 | 83   | 64   |
| 4856960 | 4856960 | 4858411 | 4858414 + | pykA | PA4329 | 286  | 223  |
| 4859328 | 4859263 | 4858490 | 4858422 - | -    | PA4330 | 79   | 56   |
|         | 4860255 | 4859329 | -         | -    | PA4331 | 31   | 26   |
|         | 4861711 | 4860248 | -         | -    | PA4332 | 66   | 65   |
|         | 4861653 | 4863176 | 4863180 + | -    | PA4333 | 553  | 457  |
|         | 4864529 | 4863273 | -         | -    | PA4334 | 19   | 21   |
| 4864993 | 4864973 | 4864665 | 4864654 - | -    | PA4335 | 85   | 70   |
| 4865603 | 4865578 | 4864994 | 4864994 - | -    | PA4336 | 84   | 75   |
|         | 4866293 | 4865682 | -         | -    | PA4337 | 7    | 6    |
|         | 4867667 | 4866387 | -         | -    | PA4338 | 14   | 12   |
| 4868846 | 4868846 | 4867767 | -         | -    | PA4339 | 24   | 18   |
| 4869503 | 4869493 | 4868921 | 4868847 - | -    | PA4340 | 62   | 50   |
|         | 4870328 | 4869558 | -         | -    | PA4341 | 1    | 3    |
|         | 4871912 | 4870428 | -         | -    | PA4342 | 4    | 4    |
|         | 4873232 | 4871913 | -         | -    | PA4343 | 2    | 1    |
|         | 4874490 | 4873270 | -         | -    | PA4344 | 7    | 5    |
|         | 4875245 | 4874655 | -         | -    | PA4345 | 26   | 20   |
|         | 4875641 | 4875306 | -         | -    | PA4346 | 9    | 14   |

|         |         |         |         |      |              |      |      |
|---------|---------|---------|---------|------|--------------|------|------|
|         | 4876792 | 4875638 | -       | -    | PA4347       | 25   | 40   |
| 4877648 | 4877606 | 4876821 | 4876820 | -    | PA4348       | 577  | 563  |
|         | 4878587 | 4877691 | -       | -    | PA4349       | 16   | 15   |
|         | 4878790 | 4879545 | +       | -    | PA4350       | 16   | 39   |
|         | 4879545 | 4880321 | +       | -    | PA4351       | 42   | 99   |
| 4881199 | 4881178 | 4880318 | -       | -    | PA4352       | 258  | 259  |
|         | 4881900 | 4881328 | -       | -    | PA4353       | 30   | 17   |
|         | 4882053 | 4882355 | +       | -    | PA4354       | 41   | 35   |
|         | 4882404 | 4883570 | +       | -    | PA4355       | 14   | 11   |
| 4883583 | 4883607 | 4884659 | 4884718 | +    | xenB PA4356  | 104  | 67   |
|         | 4884961 | 4884719 | -       | -    | PA4357       | 24   | 80   |
| 4887261 | 4887261 | 4884961 | -       | -    | PA4358       | 35   | 75   |
| 4887569 | 4887506 | 4887279 | 4887262 | -    | PA4359       | 77   | 128  |
| 4888589 | 4888195 | 4887722 | 4887722 | -    | PA4360       | 142  | 160  |
|         | 4890101 | 4889112 | -       | -    | PA4361       | 18   | 16   |
|         | 4890286 | 4891344 | +       | -    | PA4362       | 10   | 8    |
|         | 4892247 | 4891345 | -       | icIA | PA4363       | 15   | 12   |
|         | 4892345 | 4892746 | +       | -    | PA4364       | 4    | 3    |
|         | 4892748 | 4893350 | +       | -    | PA4365       | 4    | 1    |
| 4893529 | 4893697 | 4894278 | 4894291 | +    | sodB PA4366  | 3056 | 1753 |
|         | 4894459 | 4896522 | +       | bifA | PA4367       | 36   | 27   |
| 4897425 | 4897425 | 4896523 | -       | -    | PA4368       | 28   | 21   |
| 4898173 | 4897999 | 4897427 | 4897426 | -    | PA4369       | 61   | 33   |
| 4898176 |         |         | 4898191 | ?    | predicted RN | 303  | 425  |
| 4898192 | 4898193 | 4899533 | 4899548 | +    | icmP PA4370  | 491  | 515  |
| 4899646 | 4899696 | 4901117 | 4901118 | +    | PA4371       | 63   | 91   |
| 4901127 | 4901127 | 4902191 | 4902196 | +    | PA4372       | 163  | 179  |
| 4902202 | 4902202 | 4903296 | 4903296 | +    | PA4373       | 98   | 118  |
| 4903347 | 4903466 | 4904596 | 4904646 | +    | PA4374       | 44   | 36   |
| 4904647 | 4904647 | 4907703 | +       | -    | PA4375       | 24   | 23   |
| 4907741 | 4907841 | 4909037 | 4909037 | +    | pncB2 PA4376 | 54   | 51   |
|         | 4909404 | 4909162 | 4909141 | -    | PA4377       | 50   | 38   |

|         |         |         |           |       |              |      |      |
|---------|---------|---------|-----------|-------|--------------|------|------|
| 4910107 | 4910105 | 4909401 | -         | ina   | PA4378       | 55   | 53   |
| 4910870 | 4910791 | 4910108 | 4910108 - | -     | PA4379       | 49   | 50   |
|         | 4912151 | 4910871 | -         | -     | PA4380       | 22   | 23   |
| 4913040 | 4912824 | 4912141 | -         | -     | PA4381       | 57   | 50   |
|         | 4913041 | 4913835 | +         | -     | PA4382       | 10   | 7    |
|         | 4914510 | 4914127 | -         | -     | PA4383       | 30   | 20   |
| 4914739 | 4914739 | 4915425 | 4915425 + | -     | PA4384       | 31   | 24   |
| 4917174 | 4917124 | 4915481 | 4915452 - | groEL | PA4385       | 9871 | 8778 |
| 4917538 | 4917468 | 4917175 | 4917175 - | groES | PA4386       | 8192 | 7761 |
| 4917539 |         |         | 4917559 ? | -     | predicted RN | 3998 | 4599 |
| 4918145 | 4918130 | 4917663 | 4917560 - | -     | PA4387       | 92   | 90   |
| 4918936 | 4918933 | 4918199 | 4918158 - | -     | PA4388       | 75   | 59   |
| 4918937 | 4919042 | 4919800 | 4919805 + | speA  | PA4389       | 222  | 187  |
| 4920874 | 4920866 | 4919859 | 4919859 - | -     | PA4390       | 120  | 136  |
|         | 4921982 | 4920981 | -         | -     | PA4391       | 20   | 18   |
|         | 4921981 | 4922364 | +         | -     | PA4392       | 35   | 26   |
| 4922365 | 4922407 | 4924191 | 4924246 + | ampG  | PA4393       | 34   | 29   |
| 4925166 | 4925083 | 4924247 | 4924247 - | -     | PA4394       | 182  | 162  |
| 4925831 | 4925795 | 4925316 | 4925235 - | -     | PA4395       | 880  | 911  |
|         | 4925899 | 4926999 | +         | -     | PA4396       | 47   | 25   |
|         | 4927036 | 4927947 | +         | pane  | PA4397       | 14   | 11   |
|         | 4927998 | 4930094 | 4930094 + | -     | PA4398       | 19   | 19   |
| 4930095 | 4930099 | 4930677 | 4930705 + | -     | PA4399       | 44   | 36   |
| 4931723 | 4931695 | 4930748 | 4930748 - | -     | PA4400       | 109  | 68   |
| 4932381 | 4932381 | 4931746 | 4931746 - | -     | PA4401       | 55   | 58   |
| 4933865 | 4933719 | 4932502 | 4932382 - | argJ  | PA4402       | 102  | 124  |
| 4936650 | 4936616 | 4933866 | 4933866 - | secA  | PA4403       | 537  | 540  |
| 4937675 | 4937673 | 4936750 | 4936667 - | -     | PA4404       | 110  | 89   |
| 4937752 | 4937820 | 4938215 | 4938275 + | -     | PA4405       | 99   | 124  |
| 4939193 | 4939187 | 4938276 | 4938276 - | lpxC  | PA4406       | 1467 | 1919 |
| 4939277 |         |         | 4939194 - | -     | PA4406.1     | 1177 | 1423 |
| 4940513 | 4940484 | 4939300 | 4939278 - | ftsZ  | PA4407       | 948  | 1065 |

|         |         |         |           |           |      |              |       |        |
|---------|---------|---------|-----------|-----------|------|--------------|-------|--------|
| 4940514 |         |         |           | 4940526 ? | -    | predicted RN | 700   | 888    |
| 4941788 | 4941788 | 4940535 | 4940527 - | ftsA      | ftsA | PA4408       | 376   | 446    |
| 4942676 | 4942673 | 4941810 | 4941791 - | ftsQ      | ftsQ | PA4409       | 167   | 217    |
|         | 4943636 | 4942677 | 4942677 - | ddlB      | ddlB | PA4410       | 225   | 261    |
|         | 4945075 | 4943633 | -         | murC      | murC | PA4411       | 225   | 326    |
|         | 4946141 | 4945068 | -         | murG      | murG | PA4412       | 151   | 188    |
|         | 4947330 | 4946131 | -         | ftsW      | ftsW | PA4413       | 104   | 135    |
| 4948676 | 4948676 | 4947330 | -         | murD      | murD | PA4414       | 186   | 256    |
|         | 4949772 | 4948690 | 4948677 - | mray      | mray | PA4415       | 186   | 248    |
|         | 4951148 | 4949772 | -         | murF      | murF | PA4416       | 168   | 215    |
|         | 4952604 | 4951141 | -         | mure      | mure | PA4417       | 197   | 266    |
|         | 4954343 | 4952604 | -         | ftsI      | ftsI | PA4418       | 170   | 229    |
|         | 4954633 | 4954340 | -         | ftsL      | ftsL | PA4419       | 192   | 238    |
| 4955573 | 4955571 | 4954630 | -         | -         | -    | PA4420       | 267   | 364    |
| 4956081 | 4956029 | 4955574 | 4955574 - | -         | -    | PA4421       | 459   | 590    |
| 4956328 |         |         | 4956536 + | rnpB      | rnpB | PA4421.1     | 87674 | 103075 |
| 4957595 | 4957582 | 4956734 | 4956537 - | -         | -    | PA4422       | 73    | 75     |
| 4957695 | 4957709 | 4959523 | +         | -         | -    | PA4423       | 169   | 161    |
|         | 4959520 | 4959897 | 4959897 + | -         | -    | PA4424       | 153   | 205    |
| 4959898 | 4959926 | 4960519 | +         | -         | -    | PA4425       | 258   | 296    |
|         | 4960516 | 4961094 | 4961094 + | -         | -    | PA4426       | 336   | 346    |
| 4961569 | 4961558 | 4961151 | 4961145 - | sspB      | sspB | PA4427       | 337   | 315    |
| 4962272 | 4962187 | 4961570 | 4961570 - | sspa      | sspa | PA4428       | 248   | 264    |
|         | 4963055 | 4962273 | 4962273 - | -         | -    | PA4429       | 1623  | 1564   |
|         | 4964266 | 4963055 | -         | -         | -    | PA4430       | 2084  | 1994   |
| 4964917 | 4964859 | 4964266 | -         | -         | -    | PA4431       | 1873  | 1911   |
| 4965506 | 4965501 | 4965109 | 4965086 - | rpsI      | rpsI | PA4432       | 8407  | 8325   |
| 4966067 | 4965944 | 4965516 | 4965507 - | rplM      | rplM | PA4433       | 7616  | 7967   |
| 4966068 |         |         | 4966098 ? | -         | -    | predicted RN | 3988  | 5158   |
| 4966099 | 4966190 | 4967227 | 4967312 + | -         | -    | PA4434       | 65    | 63     |
|         | 4968458 | 4967313 | -         | -         | -    | PA4435       | 23    | 18     |
| 4968459 | 4968712 | 4969611 | 4969769 + | -         | -    | PA4436       | 35    | 45     |

|         |         |         |           |       |              |      |      |
|---------|---------|---------|-----------|-------|--------------|------|------|
| 4971909 | 4969770 | 4970732 | +         | -     | PA4437       | 12   | 15   |
| 4973342 | 4971891 | 4970797 | 4970797 - | -     | PA4438       | 285  | 306  |
| 4974094 | 4973332 | 4971986 | 4971981 - | trpS  | PA4439       | 226  | 205  |
| 4974120 | 4974029 | 4973400 | 4973345 - | -     | PA4440       | 105  | 74   |
| 4974148 |         |         | 4974147 ? | -     | predicted RN | 234  | 448  |
| 4976606 | 4974174 | 4974620 | 4974645 + | -     | PA4441       | 367  | 596  |
| 4977551 | 4976595 | 4974694 | 4974691 - | cysN  | PA4442       | 120  | 208  |
| 4977859 | 4977524 | 4976607 | 4976607 - | cysD  | PA4443       | 167  | 278  |
| 4979764 | 4977869 | 4978972 | +         | mltB1 | PA4444       | 62   | 53   |
| 4979812 | 4979717 | 4978959 | -         | -     | PA4445       | 84   | 81   |
| 4982103 | 4979834 | 4981003 | 4981009 + | algW  | PA4446       | 66   | 105  |
| 4983551 | 4982101 | 4981046 | 4981036 - | hisC1 | PA4447       | 110  | 101  |
| 4984187 | 4983426 | 4982104 | 4982104 - | hisD  | PA4448       | 154  | 131  |
| 4985490 | 4984187 | 4983552 | 4983552 - | hisG  | PA4449       | 410  | 410  |
| 4985750 | 4985470 | 4984205 | 4984188 - | murA  | PA4450       | 679  | 648  |
| 4985843 | 4985730 | 4985491 | 4985491 - | -     | PA4451       | 588  | 716  |
|         |         |         | 4985782 - | -     | PA4451.1     | 70   | 79   |
|         |         |         | 4985844 - | -     | PA4452       | 359  | 444  |
| 4986809 | 4986799 | 4986152 | -         | -     | PA4453       | 725  | 901  |
|         | 4987284 | 4986811 | 4986811 - | -     | PA4454       | 354  | 433  |
|         | 4988082 | 4987285 | -         | -     | PA4455       | 256  | 336  |
| 4988959 | 4988891 | 4988082 | -         | -     | PA4456       | 377  | 539  |
| 4989303 | 4989305 | 4990285 | +         | -     | PA4457       | 368  | 362  |
|         | 4990285 | 4990824 | 4990832 + | -     | PA4458       | 232  | 245  |
| 4990833 | 4990833 | 4991405 | +         | -     | PA4459       | 365  | 389  |
|         | 4991392 | 4991919 | +         | -     | PA4460       | 708  | 783  |
|         | 4991919 | 4992644 | 4992778 + | -     | PA4461       | 428  | 466  |
| 4992781 | 4992870 | 4994363 | 4994363 + | rpoN  | PA4462       | 302  | 318  |
| 4994364 |         |         | 4994397 ? | -     | predicted RN | 1356 | 876  |
| 4994398 | 4994441 | 4994749 | 4994749 + | -     | PA4463       | 1496 | 1101 |
| 4994757 | 4994763 | 4995227 | 4995228 + | ptsN  | PA4464       | 490  | 504  |
| 4995229 | 4995229 | 4996089 | 4996118 + | -     | PA4465       | 256  | 318  |

|         |         |         |           |       |        |     |     |
|---------|---------|---------|-----------|-------|--------|-----|-----|
| 4996119 | 4996119 | 4996391 | 4996402 + | -     | PA4466 | 179 | 237 |
|         | 4997420 | 4996488 | -         | -     | PA4467 | 9   | 9   |
|         | 4998050 | 4997439 | -         | sodM  | PA4468 | 13  | 9   |
|         | 4998512 | 4998063 | -         | -     | PA4469 | 9   | 6   |
|         | 4999916 | 4998540 | -         | fumC1 | PA4470 | 13  | 11  |
|         | 5000304 | 4999909 | -         | -     | PA4471 | 6   | 2   |
| 5001821 | 5001801 | 5000452 | 5000432 - | pmbA  | PA4472 | 68  | 58  |
| 5001822 | 5001822 | 5002424 | 5002424 + | -     | PA4473 | 166 | 189 |
| 5003897 | 5003897 | 5002455 | 5002425 - | -     | PA4474 | 121 | 117 |
| 5004797 | 5004748 | 5003900 | 5003898 - | -     | PA4475 | 77  | 82  |
| 5008628 | 5008628 | 5004798 | 5004798 - | -     | PA4476 | 34  | 35  |
| 5010133 | 5010100 | 5008643 | 5008629 - | cafA  | PA4477 | 95  | 75  |
| 5010749 | 5010739 | 5010134 | 5010134 - | -     | PA4478 | 70  | 66  |
|         | 5011322 | 5010828 | 5010828 - | mreD  | PA4479 | 94  | 100 |
| 5012335 | 5012314 | 5011322 | -         | mreC  | PA4480 | 151 | 172 |
| 5013465 | 5013431 | 5012394 | 5012345 - | mreB  | PA4481 | 527 | 601 |
| 5013558 | 5013671 | 5013961 | 5013961 + | gatC  | PA4482 | 358 | 332 |
| 5013962 | 5013974 | 5015428 | 5015494 + | gatA  | PA4483 | 395 | 351 |
| 5015535 | 5015535 | 5016980 | 5016980 + | gatB  | PA4484 | 455 | 420 |
| 5016982 | 5017040 | 5017417 | 5017417 + | -     | PA4485 | 55  | 71  |
| 5017438 | 5017449 | 5017835 | 5017908 + | -     | PA4486 | 73  | 86  |
| 5018755 | 5018751 | 5017960 | 5017960 - | -     | PA4487 | 75  | 86  |
|         | 5020405 | 5018756 | 5018756 - | -     | PA4488 | 52  | 62  |
| 5024957 | 5024952 | 5020402 | -         | -     | PA4489 | 104 | 124 |
|         | 5025617 | 5024979 | 5024979 - | -     | PA4490 | 99  | 121 |
| 5027383 | 5027383 | 5025614 | -         | -     | PA4491 | 123 | 140 |
| 5028241 | 5028231 | 5027422 | 5027384 - | -     | PA4492 | 123 | 141 |
| 5028979 | 5028954 | 5028394 | 5028377 - | roxR  | PA4493 | 166 | 167 |
| 5030312 | 5030248 | 5028980 | 5028980 - | roxS  | PA4494 | 85  | 80  |
| 5030507 | 5030525 | 5031235 | 5031235 + | -     | PA4495 | 127 | 103 |
| 5031479 | 5031488 | 5033101 | 5033101 + | -     | PA4496 | 50  | 139 |
| 5033159 | 5033194 | 5034792 | 5034792 + | -     | PA4497 | 29  | 71  |

|         |         |         |         |   |       |              |      |      |
|---------|---------|---------|---------|---|-------|--------------|------|------|
| 5036083 | 5036077 | 5034860 | 5034849 | - | -     | PA4498       | 148  | 346  |
| 5036238 | 5036245 | 5036808 | 5036831 | + | -     | PA4499       | 60   | 139  |
| 5036939 | 5037074 | 5038675 | 5038675 | + | -     | PA4500       | 222  | 2292 |
| 5038676 | 5038901 | 5040355 | 5040360 | + | opdP  | PA4501       | 30   | 713  |
| 5040361 | 5040405 | 5042000 | 5042000 | + | -     | PA4502       | 49   | 1121 |
| 5042001 |         |         | 5042063 | ? | -     | predicted RN | 73   | 1492 |
| 5042064 | 5042068 | 5043078 | 5043089 | + | -     | PA4503       | 52   | 1109 |
| 5043090 | 5043090 | 5044001 | 5044001 | + | -     | PA4504       | 25   | 721  |
| 5044006 | 5044054 | 5045028 |         | + | -     | PA4505       | 34   | 828  |
|         | 5045028 | 5045999 | 5045999 | + | -     | PA4506       | 35   | 818  |
| 5046682 | 5046664 | 5046032 | 5046030 | - | -     | PA4507       | 55   | 128  |
|         | 5046806 | 5047279 |         | + | -     | PA4508       | 23   | 29   |
|         | 5048213 | 5047284 |         | - | -     | PA4509       | 17   | 16   |
|         | 5048887 | 5048210 |         | - | -     | PA4510       | 26   | 23   |
| 5049752 | 5049639 | 5048884 |         | - | -     | PA4511       | 38   | 32   |
| 5049760 | 5049769 | 5050668 | 5050668 | + | lpxO1 | PA4512       | 151  | 92   |
| 5053615 | 5053400 | 5050848 | 5050669 | - | -     | PA4513       | 24   | 38   |
| 5055890 | 5055877 | 5053616 | 5053616 | - | -     | PA4514       | 68   | 124  |
| 5056089 | 5056095 | 5056775 | 5056777 | + | -     | PA4515       | 40   | 68   |
| 5056778 | 5056778 | 5057593 | 5057715 | + | -     | PA4516       | 50   | 62   |
|         | 5057716 | 5059518 |         | + | -     | PA4517       | 22   | 21   |
|         | 5059999 | 5059574 |         | - | -     | PA4518       | 30   | 30   |
| 5061533 | 5061278 | 5060115 | 5060110 | - | spec  | PA4519       | 239  | 330  |
|         | 5063751 | 5061730 |         | - | -     | PA4520       | 26   | 32   |
|         | 5064777 | 5063941 |         | - | -     | PA4521       | 31   | 24   |
|         | 5065340 | 5064774 |         | - | ampD  | PA4522       | 38   | 24   |
| 5068031 | 5067746 | 5065491 | 5065354 | - | -     | PA4523       | 125  | 41   |
| 5068032 | 5068032 | 5068880 | 5068891 | + | nadC  | PA4524       | 72   | 67   |
| 5069007 |         |         | 5068932 | - | -     | PA4524.1     | 2151 | 1807 |
| 5069541 | 5069531 | 5069082 | 5069008 | - | pilA  | PA4525       | 6412 | 5365 |
| 5069542 |         |         | 5069557 | ? | -     | predicted RN | 1712 | 1370 |
| 5069756 | 5069763 | 5071463 | 5071976 | + | pilB  | PA4526       | 188  | 109  |

|         |         |           |   |              |     |      |
|---------|---------|-----------|---|--------------|-----|------|
| 5071991 |         | 5072168 ? | - | predicted RN | 528 | 105  |
|         | 5072695 | 5073567   | + | pilD         | 136 | 38   |
|         | 5073564 | 5074175   | + | coaE         | 155 | 85   |
|         | 5074172 | 5074372   | + | -            | 113 | 60   |
| 5074623 | 5074618 | 5074409   | - | -            | 73  | 65   |
|         | 5075413 | 5074724   | - | -            | 31  | 40   |
|         | 5075880 | 5075410   | - | -            | 49  | 57   |
| 5076315 | 5076302 | 5075877   | - | -            | 60  | 80   |
| 5076403 | 5076435 | 5077064   | + | -            | 61  | 30   |
|         | 5077061 | 5077510   | + | -            | 25  | 16   |
| 5077530 | 5077536 | 5077706   | + | -            | 90  | 86   |
| 5077765 | 5077770 | 5079077   | + | ndh          | 117 | 74   |
| 5080442 | 5080208 | 5079117   | - | -            | 65  | 76   |
|         | 5080757 | 5082394   | + | -            | 3   | 2    |
|         | 5082443 | 5086696   | + | -            | 13  | 10   |
| 5087000 |         | 5086925   | - | -            | 72  | 264  |
| 5087087 |         | 5087011   | - | -            | 289 | 1180 |
| 5087172 |         | 5087097   | - | -            | 455 | 2133 |
| 5089972 | 5089972 | 5087408   | - | clpB         | 269 | 317  |
|         | 5090856 | 5090128   | - | -            | 74  | 87   |
| 5091889 | 5091815 | 5090853   | - | rluD         | 169 | 201  |
| 5091916 | 5091961 | 5092986   | + | comL         | 226 | 272  |
| 5092987 | 5093378 | 5094970   | + | pilS         | 37  | 43   |
| 5094971 | 5094985 | 5096322   | + | pilR         | 68  | 64   |
| 5097550 | 5097462 | 5096368   | - | -            | 96  | 49   |
|         | 5097597 | 5098106   | + | fimT         | 5   | 3    |
|         | 5098212 | 5098718   | + | fimU         | 169 | 35   |
|         | 5098709 | 5099266   | + | pilV         | 84  | 21   |
|         | 5099263 | 5100087   | + | pilW         | 107 | 28   |
|         | 5100084 | 5100671   | + | pilX         | 102 | 31   |
| 5100678 | 5100683 | 5104168   | + | pilY1        | 143 | 44   |
| 5104170 | 5104170 | 5104517   | + | pilY2        | 152 | 53   |

|         |         |         |         |   |      |              |      |      |
|---------|---------|---------|---------|---|------|--------------|------|------|
| 5105968 | 5104514 | 5104939 | 5104958 | + | pile | PA4556       | 114  | 44   |
|         | 5105930 | 5104986 | 5104982 | - | lytB | PA4557       | 185  | 248  |
|         | 5106456 | 5106016 | 5106016 | - | -    | PA4558       | 346  | 400  |
| 5109805 | 5106958 | 5106449 |         | - | lspa | PA4559       | 348  | 404  |
|         | 5109782 | 5106951 |         | - | ileS | PA4560       | 382  | 417  |
| 5110747 | 5110744 | 5109806 | 5109806 | - | ribF | PA4561       | 198  | 239  |
| 5112512 | 5112379 | 5110841 | 5110748 | - | -    | PA4562       | 32   | 39   |
| 5112632 |         |         | 5112654 | ? | -    | predicted RN | 801  | 1442 |
| 5112655 | 5112663 | 5112938 | 5112966 | + | rpst | PA4563       | 2996 | 4136 |
| 5113469 | 5113469 | 5113005 | 5113002 | - | -    | PA4564       | 151  | 170  |
| 5114669 | 5114599 | 5113481 | 5113480 | - | prob | PA4565       | 252  | 264  |
| 5115946 | 5115890 | 5114670 | 5114670 | - | obg  | PA4566       | 301  | 272  |
| 5116012 |         |         | 5116031 | ? | -    | predicted RN | 536  | 622  |
| 5116289 | 5116289 | 5116032 | 5116032 | - | rpma | PA4567       | 6443 | 5777 |
| 5116803 | 5116624 | 5116313 | 5116290 | - | rplu | PA4568       | 8471 | 8037 |
| 5116855 | 5116865 | 5117833 | 5117843 | + | ispB | PA4569       | 259  | 301  |
|         | 5117971 | 5118195 |         | + | -    | PA4570       | 11   | 9    |
| 5118462 | 5118538 | 5120565 | 5120622 | + | -    | PA4571       | 125  | 176  |
| 5121254 | 5121252 | 5120635 | 5120623 | - | fkIB | PA4572       | 322  | 248  |
| 5121893 | 5121642 | 5121337 | 5121260 | - | -    | PA4573       | 34   | 49   |
| 5122398 | 5122387 | 5121899 | 5121898 | - | -    | PA4574       | 178  | 289  |
|         | 5122902 | 5122561 |         | - | -    | PA4575       | 35   | 26   |
| 5125508 | 5125506 | 5123053 | 5123037 | - | -    | PA4576       | 171  | 162  |
| 5125975 | 5125931 | 5125605 | 5125531 | - | -    | PA4577       | 189  | 95   |
| 5126137 | 5126166 | 5126654 | 5126655 | + | -    | PA4578       | 1179 | 1002 |
| 5126656 | 5126713 | 5128569 |         | + | -    | PA4579       | 90   | 72   |
| 5129172 | 5129117 | 5128563 |         | - | -    | PA4580       | 71   | 63   |
|         | 5130768 | 5129173 |         | - | rtcR | PA4581       | 25   | 20   |
| 5131082 |         |         | 5131155 | + | -    | PA4581.1     | 217  | 216  |
| 5131156 | 5131428 | 5132573 | 5132628 | + | -    | PA4582       | 32   | 27   |
|         | 5132629 | 5133843 | 5133843 | + | -    | PA4583       | 40   | 29   |
| 5133844 | 5133880 | 5134692 |         | + | -    | PA4584       | 40   | 34   |

|         |         |         |         |   |       |              |     |     |
|---------|---------|---------|---------|---|-------|--------------|-----|-----|
|         | 5134689 | 5135714 | 5135815 | + | rtcA  | PA4585       | 41  | 37  |
|         | 5135816 | 5136193 |         | + | -     | PA4586       | 22  | 25  |
| 5136295 | 5136317 | 5137357 | 5137377 | + | ccpR  | PA4587       | 45  | 58  |
| 5138816 | 5138754 | 5137417 | 5137417 | - | gdhA  | PA4588       | 52  | 39  |
|         | 5140441 | 5139050 |         | - | -     | PA4589       | 7   | 10  |
|         | 5141189 | 5140701 |         | - | pra   | PA4590       | 23  | 22  |
|         | 5143063 | 5141786 |         | - | -     | PA4591       | 8   | 8   |
|         | 5144534 | 5143053 |         | - | -     | PA4592       | 11  | 11  |
|         | 5145720 | 5144527 |         | - | -     | PA4593       | 11  | 9   |
|         | 5146403 | 5145717 |         | - | -     | PA4594       | 19  | 13  |
| 5148578 | 5148571 | 5146907 | 5146902 | - | -     | PA4595       | 536 | 434 |
|         | 5149064 | 5149582 |         | + | -     | PA4596       | 38  | 27  |
|         | 5151072 | 5149633 |         | - | oprI  | PA4597       | 10  | 12  |
|         | 5154209 | 5151078 |         | - | mexD  | PA4598       | 11  | 8   |
|         | 5155400 | 5154237 |         | - | mexC  | PA4599       | 9   | 5   |
| 5155548 | 5155561 | 5156124 | 5156367 | + | nfxB  | PA4600       | 51  | 42  |
|         | 5156368 | 5160615 |         | + | morA  | PA4601       | 25  | 25  |
| 5160717 | 5160738 | 5161991 | 5161994 | + | glyA3 | PA4602       | 748 | 751 |
| 5162457 | 5162449 | 5162069 | 5161995 | - | -     | PA4603       | 38  | 17  |
| 5163534 | 5163476 | 5162472 | 5162458 | - | -     | PA4604       | 66  | 28  |
| 5163782 | 5163739 | 5163536 | 5163536 | - | -     | PA4605       | 275 | 109 |
| 5165869 | 5165854 | 5163788 | 5163788 | - | -     | PA4606       | 363 | 127 |
| 5166697 | 5166697 | 5166191 | 5166167 | - | -     | PA4607       | 135 | 78  |
| 5166698 |         |         | 5166710 | ? | -     | predicted RN | 98  | 63  |
| 5166809 | 5166900 | 5167277 | 5167277 | + | -     | PA4608       | 75  | 54  |
| 5168656 | 5168645 | 5167284 | 5167278 | - | radA  | PA4609       | 66  | 75  |
|         | 5168755 | 5169189 |         | + | -     | PA4610       | 47  | 28  |
| 5169512 | 5169505 | 5169251 | 5169245 | - | -     | PA4611       | 290 | 146 |
|         | 5170131 | 5169580 |         | - | -     | PA4612       | 11  | 8   |
| 5171764 | 5171726 | 5170185 | 5170132 | - | katB  | PA4613       | 15  | 24  |
| 5172123 | 5172253 | 5172666 | 5172666 | + | mscL  | PA4614       | 286 | 186 |
| 5173612 | 5173547 | 5172771 | 5172718 | - | -     | PA4615       | 88  | 54  |

|         |         |         |           |           |        |        |     |
|---------|---------|---------|-----------|-----------|--------|--------|-----|
| 5174652 | 5174652 | 5173654 | -         | -         | PA4616 | 79     | 10  |
| 5174653 | 5174980 | 5176104 | 5176104 + | -         | PA4617 | 45     | 44  |
| 5177651 | 5177651 | 5176680 | 5176105 - | -         | PA4618 | 95     | 53  |
| 5178902 | 5178902 | 5177655 | 5177652 - | -         | PA4619 | 102    | 43  |
| 5182363 | 5179444 | 5178905 | 5178903 - | -         | PA4620 | 124    | 37  |
|         | 5182268 | 5179437 | -         | -         | PA4621 | 107    | 37  |
|         | 5182579 | 5183790 | +         | -         | PA4622 | 14     | 14  |
|         | 5184339 | 5183950 | -         | -         | PA4623 | 9      | 10  |
| 5192875 | 5186348 | 5184642 | -         | -         | PA4624 | 12     | 17  |
|         | 5192875 | 5186411 | -         | -         | PA4625 | 11     | 21  |
|         | 5193196 | 5194167 | +         | hprA      | PA4626 | 31     | 24  |
| 5194168 | 5194277 | 5195275 | 5195291 + | -         | PA4627 | 73     | 64  |
| 5195370 | 5195370 | 5196833 | 5196878 + | lysP      | PA4628 | 108    | 90  |
| 5197186 | 5197186 | 5197764 | +         | -         | PA4629 | 26     | 32  |
| 5197875 | 5197881 | 5198324 | 5198325 + | -         | PA4630 | 57     | 70  |
| 5199501 | 5199359 | 5198334 | 5198334 - | -         | PA4631 | 124    | 158 |
| 5200331 | 5200324 | 5199503 | 5199502 - | -         | PA4632 | 360    | 390 |
| 5200438 | 5200487 | 5202625 | 5202625 + | -         | PA4633 | 61     | 59  |
| 5203313 | 5203242 | 5202628 | 5202626 - | -         | PA4634 | 59     | 55  |
| 5204894 | 5203668 | 5204372 | +         | -         | PA4635 | 11     | 7   |
|         | 5204928 | 5206088 | 5206090 + | -         | PA4636 | 150    | 199 |
|         | 5206566 | 5206487 | 5206209   | 5206147 - | -      | PA4637 | 152 |
| 5207034 | 5207007 | 5206720 | 5206569 - | -         | PA4638 | 47     | 51  |
| 5207631 | 5207622 | 5207035 | 5207035 - | -         | PA4639 | 250    | 338 |
| 5207907 | 5208464 | 5209987 | 5210166 + | mqqB      | PA4640 | 400    | 279 |
| 5210996 | 5210996 | 5210706 | 5210683 - | -         | PA4642 | 117    | 162 |
| 5211567 | 5211564 | 5211079 | 5211026 - | -         | PA4643 | 68     | 68  |
| 5212106 | 5212105 | 5211632 | -         | -         | PA4644 | 155    | 115 |
| 5212675 | 5212664 | 5212107 | 5212107 - | -         | PA4645 | 289    | 231 |
| 5212822 | 5212833 | 5213471 | 5213473 + | upp       | PA4646 | 146    | 141 |
| 5213474 | 5213474 | 5214757 | 5214763 + | uraA      | PA4647 | 122    | 110 |
|         | 5215091 | 5215639 | +         | -         | PA4648 | 6      | 7   |

|         |         |         |           |      |              |      |      |
|---------|---------|---------|-----------|------|--------------|------|------|
|         | 5215670 | 5216203 | +         | -    | PA4649       | 6    | 7    |
|         | 5216203 | 5216745 | +         | -    | PA4650       | 3    | 4    |
|         | 5216764 | 5217552 | +         | -    | PA4651       | 4    | 6    |
|         | 5217569 | 5219941 | +         | -    | PA4652       | 3    | 3    |
|         | 5219938 | 5220885 | +         | -    | PA4653       | 8    | 5    |
|         | 5222260 | 5220887 | -         | -    | PA4654       | 5    | 1    |
|         | 5223562 | 5222540 | 5222417 - | hemH | PA4655       | 75   | 70   |
| 5224889 | 5224476 | 5223559 | -         | -    | PA4656       | 40   | 39   |
| 5224890 | 5224890 | 5225873 | 5225883 + | -    | PA4657       | 44   | 35   |
|         | 5226026 | 5226982 | +         | -    | PA4658       | 20   | 19   |
|         | 5226992 | 5227891 | +         | -    | PA4659       | 18   | 18   |
|         | 5227888 | 5229333 | 5229455 + | phr  | PA4660       | 77   | 59   |
| 5230006 | 5229980 | 5229459 | 5229459 - | pagL | PA4661       | 1532 | 1218 |
|         | 5230911 | 5230114 | 5230012 - | murI | PA4662       | 117  | 156  |
|         | 5231659 | 5230901 | -         | moeb | PA4663       | 158  | 190  |
| 5232484 | 5232483 | 5231653 | -         | hemK | PA4664       | 198  | 232  |
| 5233584 | 5233567 | 5232485 | 5232485 - | prfA | PA4665       | 227  | 244  |
| 5234865 | 5234853 | 5233585 | 5233585 - | hemA | PA4666       | 167  | 224  |
| 5234997 | 5234997 | 5236769 | 5236772 + | -    | PA4667       | 134  | 137  |
| 5236774 | 5236774 | 5237391 | 5237392 + | -    | PA4668       | 95   | 90   |
| 5237393 | 5237393 | 5238241 | 5238276 + | ipk  | PA4669       | 1202 | 2660 |
| 5238277 |         |         | 5238351 + | -    | PA4669.1     | 2877 | 5950 |
| 5238352 | 5238408 | 5239349 | 5239357 + | prs  | PA4670       | 1556 | 2660 |
| 5239361 | 5239466 | 5240080 | 5240095 + | -    | PA4671       | 5625 | 5554 |
| 5240096 |         |         | 5240111 ? | -    | predicted RN | 3337 | 3108 |
| 5240112 | 5240122 | 5240706 | 5240746 + | -    | PA4672       | 367  | 491  |
| 5240747 | 5240747 | 5241847 | 5241858 + | -    | PA4673       | 392  | 523  |
| 5242026 |         |         | 5242102 + | -    | PA4673.1     | 0    | 13   |
| 5242849 | 5242559 | 5242254 | 5242249 - | -    | PA4674       | 83   | 116  |
| 5243163 | 5243178 | 5245406 | 5245406 + | -    | PA4675       | 169  | 157  |
| 5246125 | 5246123 | 5245476 | 5245407 - | -    | PA4676       | 200  | 178  |
| 5247423 | 5247423 | 5246185 | 5246137 - | -    | PA4677       | 41   | 39   |

|         |         |         |         |   |       |          |      |      |
|---------|---------|---------|---------|---|-------|----------|------|------|
|         | 5248074 | 5247622 | 5247424 | - | riml  | PA4678   | 43   | 53   |
| 5248950 | 5248772 | 5248071 | -       | - | -     | PA4679   | 71   | 70   |
|         | 5249568 | 5249032 | -       | - | -     | PA4680   | 4    | 2    |
|         | 5250618 | 5249599 | -       | - | -     | PA4681   | 4    | 4    |
|         | 5251666 | 5250620 | -       | - | -     | PA4682   | 7    | 5    |
|         | 5252473 | 5251871 | -       | - | -     | PA4683   | 27   | 27   |
| 5252756 | 5252758 | 5254056 | +       | + | -     | PA4684   | 113  | 141  |
|         | 5254046 | 5254741 | +       | + | -     | PA4685   | 12   | 148  |
|         | 5254738 | 5257584 | +       | + | -     | PA4686   | 160  | 164  |
| 5257687 | 5257696 | 5258703 | +       | + | hitA  | PA4687   | 260  | 270  |
| 5258704 | 5258724 | 5260262 | +       | + | hitB  | PA4688   | 82   | 96   |
| 5263928 | 5262649 | 5260343 | -       | - | -     | PA4689   | 55   | 55   |
| 5264219 |         |         | 5264100 | - | -     | PA4690.1 | 2    | 3    |
| 5267252 |         |         | 5264362 | - | -     | PA4690.2 | 59   | 54   |
| 5267554 |         |         | 5267479 | - | -     | PA4690.3 | 1093 | 1194 |
| 5267659 |         |         | 5267583 | - | -     | PA4690.4 | 1680 | 1738 |
| 5269259 |         |         | 5267724 | - | -     | PA4690.5 | 48   | 54   |
|         | 5270411 | 5269803 | -       | - | -     | PA4691   | 18   | 17   |
|         | 5271424 | 5270411 | -       | - | -     | PA4692   | 24   | 20   |
| 5272365 | 5272300 | 5271485 | 5271425 | - | pssA  | PA4693   | 345  | 386  |
| 5273513 | 5273471 | 5272455 | 5272438 | - | ilvC  | PA4694   | 757  | 554  |
| 5274005 | 5274005 | 5273514 | 5273514 | - | ilvH  | PA4695   | 374  | 339  |
| 5275977 | 5275732 | 5274008 | 5274006 | - | ilvI  | PA4696   | 331  | 290  |
| 5276282 | 5276283 | 5276735 | 5276782 | + | -     | PA4697   | 169  | 73   |
|         | 5277172 | 5276843 | 5276836 | - | -     | PA4698   | 171  | 197  |
| 5277967 | 5277951 | 5277172 | -       | - | -     | PA4699   | 173  | 178  |
| 5280292 | 5280292 | 5277968 | 5277968 | - | mrcB  | PA4700   | 90   | 116  |
| 5280503 | 5280505 | 5282067 | 5282070 | + | -     | PA4701   | 148  | 99   |
|         | 5282159 | 5282506 | +       | + | -     | PA4702   | 12   | 15   |
|         | 5282732 | 5283004 | +       | + | -     | PA4703   | 9    | 7    |
|         | 5283109 | 5283906 | +       | + | cbpA  | PA4704   | 44   | 14   |
| 5283960 |         |         | 5284110 | + | prfF1 | PA4704.1 | 30   | 29   |

[illegible]

|         |         |         |           |      |          |       |      |
|---------|---------|---------|-----------|------|----------|-------|------|
| 5313113 | 5313206 | 5313586 | 5313592 + | pand | PA4731   | 129   | 138  |
| 5313663 | 5313676 | 5315340 | 5315340 + | pgi  | PA4732   | 184   | 134  |
| 5315482 | 5315534 | 5317471 | 5317557 + | acsB | PA4733   | 32    | 31   |
| 5317565 | 5317569 | 5318450 | 5318556 + | -    | PA4734   | 62    | 46   |
| 5318557 | 5318575 | 5321841 | 5321841 + | -    | PA4735   | 62    | 61   |
| 5321842 | 5321846 | 5322139 | 5322205 + | -    | PA4736   | 131   | 118  |
| 5322235 | 5322235 | 5322450 | 5322457 + | -    | PA4737   | 72    | 94   |
| 5322729 | 5322707 | 5322510 | 5322503 - | -    | PA4738   | 71    | 42   |
| 5323138 | 5323101 | 5322757 | 5322757 - | -    | PA4739   | 62    | 38   |
| 5325644 | 5325479 | 5323374 | 5323374 - | pnp  | PA4740   | 1060  | 815  |
| 5326009 | 5325922 | 5325653 | 5325645 - | rpsO | PA4741   | 10671 | 9903 |
| 5326932 | 5326932 | 5326018 | 5326013 - | trub | PA4742   | 382   | 385  |
| 5327426 | 5327324 | 5326935 | 5326933 - | rbfa | PA4743   | 320   | 302  |
| 5329976 | 5329949 | 5327427 | 5327427 - | infB | PA4744   | 1287  | 1066 |
| 5331458 | 5331458 | 5329977 | 5329977 - | nusa | PA4745   | 1034  | 924  |
| 5332086 | 5331961 | 5331503 | 5331459 - | -    | PA4746   | 322   | 484  |
| 5332163 |         |         | 5332087 - | -    | PA4746.1 | 507   | 1032 |
| 5332339 |         |         | 5332254 - | -    | PA4746.2 | 1214  | 1701 |
| 5332743 | 5332743 | 5332354 | 5332340 - | secG | PA4747   | 1497  | 1929 |
| 5333502 | 5333501 | 5332746 | 5332744 - | tpia | PA4748   | 1441  | 2191 |
| 5334920 | 5334904 | 5333567 | 5333506 - | glmM | PA4749   | 399   | 418  |
| 5335781 | 5335772 | 5334921 | 5334921 - | folP | PA4750   | 177   | 228  |
| 5337762 | 5337701 | 5335782 | 5335782 - | ftsH | PA4751   | 401   | 385  |
| 5338598 | 5338523 | 5337900 | 5337900 - | ftsJ | PA4752   | 142   | 156  |
| 5338605 | 5338618 | 5338932 | 5338933 + | -    | PA4753   | 515   | 448  |
| 5339390 | 5339380 | 5338973 | 5338934 - | -    | PA4754   | 316   | 263  |
|         | 5339867 | 5339391 | 5339391 - | greA | PA4755   | 698   | 594  |
| 5343085 | 5343085 | 5339864 | -         | carB | PA4756   | 402   | 339  |
| 5343755 | 5343755 | 5343105 | 5343086 - | -    | PA4757   | 206   | 224  |
| 5344932 | 5344903 | 5343767 | 5343756 - | carA | PA4758   | 356   | 355  |
| 5345060 |         |         | 5344950 - | -    | PA4758.1 | 129   | 120  |
| 5345892 | 5345892 | 5345086 | 5345061 - | dapB | PA4759   | 333   | 387  |

|         |         |         |           |      |              |      |      |
|---------|---------|---------|-----------|------|--------------|------|------|
| 5347180 | 5347082 | 5345949 | 5345893 - | dnal | PA4760       | 464  | 475  |
| 5349154 | 5349111 | 5347198 | 5347182 - | dnak | PA4761       | 1769 | 1648 |
| 5349155 |         |         | 5349178 ? | -    | predicted RN | 1364 | 1312 |
| 5349810 | 5349761 | 5349201 | 5349179 - | grpe | PA4762       | 799  | 811  |
| 5349838 | 5349929 | 5351605 | 5351674 + | recN | PA4763       | 67   | 38   |
| 5352108 | 5352079 | 5351675 | 5351675 - | fur  | PA4764       | 808  | 638  |
| 5352109 |         |         | 5352123 ? | -    | predicted RN | 608  | 820  |
| 5352124 | 5352177 | 5352707 | 5352707 + | omla | PA4765       | 531  | 615  |
|         | 5353080 | 5352775 | 5352767 - | -    | PA4766       | 91   | 112  |
| 5353668 | 5353507 | 5353073 | -         | -    | PA4767       | 187  | 198  |
| 5353783 | 5353783 | 5354262 | 5354284 + | smpB | PA4768       | 408  | 471  |
| 5355058 | 5355058 | 5354285 | 5354285 - | -    | PA4769       | 165  | 116  |
| 5355075 | 5355387 | 5357075 | 5357075 + | lldp | PA4770       | 95   | 28   |
| 5357082 | 5357230 | 5358375 | 5358441 + | lldD | PA4771       | 68   | 31   |
| 5358442 | 5358442 | 5361258 | +         | -    | PA4772       | 45   | 23   |
| 5361562 | 5361586 | 5362068 | 5362068 + | -    | PA4773       | 207  | 199  |
| 5362093 | 5362146 | 5363195 | 5363197 + | -    | PA4774       | 130  | 107  |
| 5363198 | 5363198 | 5364058 | 5364064 + | -    | PA4775       | 64   | 64   |
| 5364065 | 5364071 | 5364736 | 5364759 + | pmrA | PA4776       | 45   | 41   |
|         | 5364760 | 5366193 | + +       | pmrB | PA4777       | 20   | 21   |
| 5366252 | 5366257 | 5366655 | 5366655 + | cueR | PA4778       | 238  | 225  |
|         | 5368080 | 5367187 | -         | -    | PA4779       | 17   | 16   |
| 5369154 | 5369063 | 5368170 | 5368081 - | -    | PA4780       | 56   | 39   |
|         | 5370368 | 5369187 | -         | -    | PA4781       | 12   | 10   |
| 5370721 | 5370721 | 5370476 | 5370369 - | -    | PA4782       | 67   | 84   |
| 5371646 | 5371645 | 5370755 | 5370722 - | -    | PA4783       | 33   | 53   |
| 5371647 | 5371800 | 5372267 | 5372590 + | -    | PA4784       | 32   | 28   |
|         | 5373868 | 5372591 | -         | -    | PA4785       | 6    | 6    |
|         | 5374123 | 5375478 | +         | -    | PA4786       | 16   | 11   |
| 5376626 | 5376591 | 5375590 | 5375479 - | -    | PA4787       | 111  | 103  |
|         | 5376852 | 5377709 | +         | -    | PA4788       | 2    | 2    |
| 5377776 | 5377791 | 5378096 | +         | -    | PA4789       | 60   | 54   |

|         |         |         |         |   |       |          |     |     |
|---------|---------|---------|---------|---|-------|----------|-----|-----|
| 5380572 | 5378093 | 5378842 | 5378907 | + | -     | PA4790   | 36  | 41  |
|         | 5378908 | 5379528 |         | + | -     | PA4791   | 27  | 27  |
|         | 5380448 | 5379513 |         | - | -     | PA4792   | 13  | 14  |
|         | 5380580 | 5381143 | 5381144 | + | -     | PA4793   | 107 | 48  |
|         | 5381145 | 5381627 |         | + | -     | PA4794   | 41  | 39  |
|         | 5381617 | 5381994 |         | + | -     | PA4795   | 47  | 76  |
|         | 5381991 | 5382458 | 5382795 | + | -     | PA4796   | 48  | 72  |
|         | 5383812 | 5382796 |         | - | -     | PA4797   | 18  | 16  |
|         | 5383947 | 5384675 |         | + | -     | PA4798   | 29  | 28  |
|         | 5385276 | 5384698 |         | - | -     | PA4799   | 13  | 11  |
|         | 5386073 | 5385273 |         | - | -     | PA4800   | 14  | 18  |
|         | 5386737 | 5386369 | 5386074 | - | -     | PA4801   | 37  | 40  |
| 5386844 | 5387000 | 5387722 |         | + | -     | PA4802   | 12  | 11  |
| 5387857 |         |         | 5387766 | - | -     | PA4802.1 | 56  | 51  |
|         | 5388607 | 5387990 |         | - | -     | PA4803   | 28  | 14  |
|         | 5390099 | 5388702 |         | - | -     | PA4804   | 15  | 8   |
|         | 5391554 | 5390148 |         | - | -     | PA4805   | 3   | 3   |
| 5395870 | 5391836 | 5392519 |         | + | -     | PA4806   | 19  | 18  |
|         | 5394448 | 5392523 |         | - | selB  | PA4807   | 35  | 37  |
|         | 5395851 | 5394445 |         | - | selA  | PA4808   | 62  | 46  |
|         | 5396859 | 5395930 |         | - | fdhE  | PA4809   | 26  | 30  |
| 5398619 | 5397618 | 5396992 | 5396992 | - | fdnI  | PA4810   | 76  | 72  |
|         | 5398619 | 5397690 | 5397690 | - | fdnH  | PA4811   | 72  | 81  |
|         | 5401708 | 5398628 | 5398620 | - | fdnG  | PA4812   | 179 | 166 |
|         | 5402945 | 5402016 |         | - | lipC  | PA4813   | 2   | 3   |
| 5405490 | 5403305 | 5405350 |         | + | fadH2 | PA4814   | 1   | 1   |
|         | 5405559 | 5406008 | 5406164 | + | -     | PA4815   | 45  | 39  |
|         | 5406165 | 5407400 |         | + | -     | PA4816   | 18  | 15  |
|         | 5407376 | 5407870 |         | + | -     | PA4817   | 9   | 9   |
|         | 5409309 | 5407873 |         | - | -     | PA4818   | 4   | 3   |
|         | 5410280 | 5409306 |         | - | -     | PA4819   | 2   | 2   |
|         | 5410639 | 5410277 |         | - | -     | PA4820   | 4   | 1   |

|         |         |         |         |      |        |      |      |
|---------|---------|---------|---------|------|--------|------|------|
|         | 5410876 | 5412237 | +       | -    | PA4821 | 18   | 14   |
|         | 5414236 | 5412569 | -       | -    | PA4822 | 7    | 4    |
|         | 5414488 | 5414279 | -       | -    | PA4823 | 0    | 1    |
|         | 5415315 | 5414539 | -       | -    | PA4824 | 2    | 2    |
|         | 5418124 | 5415413 | -       | mgta | PA4825 | 6    | 2    |
| 5418863 | 5418569 | 5418351 | 5418295 | -    | PA4826 | 26   | 28   |
|         | 5419738 | 5418899 | -       | -    | PA4827 | 21   | 14   |
|         | 5419863 | 5420318 | +       | -    | PA4828 | 7    | 7    |
|         | 5421726 | 5420323 | -       | lpd3 | PA4829 | 13   | 9    |
|         | 5421899 | 5422438 | +       | -    | PA4830 | 14   | 16   |
| 5422468 | 5422506 | 5423066 | 5423070 | +    | PA4831 | 44   | 39   |
|         | 5423868 | 5423071 | -       | -    | PA4832 | 17   | 14   |
|         | 5424099 | 5424716 | +       | -    | PA4833 | 34   | 24   |
|         | 5425615 | 5424761 | -       | -    | PA4834 | 5    | 5    |
|         | 5426898 | 5425597 | -       | -    | PA4835 | 6    | 3    |
|         | 5427686 | 5426895 | -       | -    | PA4836 | 5    | 3    |
|         | 5429842 | 5427716 | -       | -    | PA4837 | 5    | 2    |
|         | 5429984 | 5431138 | +       | -    | PA4838 | 18   | 15   |
| 5433291 | 5433291 | 5431381 | 5431350 | -    | speA   | 125  | 202  |
| 5433971 | 5433912 | 5433541 | 5433292 | -    | PA4840 | 100  | 239  |
| 5434652 | 5434652 | 5434116 | 5434016 | -    | PA4841 | 81   | 74   |
| 5435880 | 5435726 | 5434656 | 5434653 | -    | PA4842 | 164  | 136  |
| 5436042 | 5436079 | 5437707 | 5437707 | +    | PA4843 | 99   | 113  |
|         | 5437785 | 5439758 | +       | -    | PA4844 | 7    | 8    |
| 5439759 | 5439918 | 5441693 | 5441826 | +    | dipZ   | 47   | 43   |
| 5441837 | 5441837 | 5442280 | 5442280 | +    | aroQ1  | 387  | 614  |
| 5442281 | 5442304 | 5442774 | 5442774 | +    | accB   | 1283 | 1393 |
| 5442775 | 5442792 | 5444141 | 5444155 | +    | accC   | 1171 | 1334 |
|         | 5444252 | 5445118 | +       | -    | PA4849 | 19   | 29   |
| 5445178 | 5445199 | 5446083 | 5446083 | +    | prmA   | 111  | 127  |
| 5446084 | 5446179 | 5447444 | 5447500 | +    | PA4851 | 123  | 130  |
| 5447628 | 5447648 | 5448646 | +       | -    | PA4852 | 400  | 525  |

|         |         |         |           |      |        |     |     |
|---------|---------|---------|-----------|------|--------|-----|-----|
|         | 5448643 | 5448966 | 5448966 + | fis  | PA4853 | 528 | 559 |
| 5448967 | 5449046 | 5450653 | 5450653 + | purH | PA4854 | 314 | 323 |
| 5450654 | 5450757 | 5452046 | 5452053 + | purD | PA4855 | 215 | 249 |
| 5452054 | 5452150 | 5454978 | 5455035 + | rets | PA4856 | 71  | 80  |
|         | 5455434 | 5456027 | +         | -    | PA4857 | 20  | 16  |
|         | 5456452 | 5457717 | +         | -    | PA4858 | 6   | 6   |
|         | 5458500 | 5459453 | +         | -    | PA4859 | 2   | 0   |
|         | 5459450 | 5460529 | +         | -    | PA4860 | 2   | 1   |
|         | 5460526 | 5461383 | +         | -    | PA4861 | 4   | 1   |
|         | 5461520 | 5462218 | +         | -    | PA4862 | 5   | 4   |
|         | 5462302 | 5462754 | +         | -    | PA4863 | 33  | 28  |
|         | 5462763 | 5463605 | +         | ured | PA4864 | 17  | 13  |
|         | 5463607 | 5463909 | +         | ureA | PA4865 | 24  | 14  |
|         | 5463918 | 5464436 | 5464436 + | -    | PA4866 | 25  | 20  |
|         | 5464453 | 5464758 | +         | ureB | PA4867 | 12  | 18  |
|         | 5464821 | 5466521 | 5466521 + | ureC | PA4868 | 23  | 22  |
| 5466542 | 5466790 | 5468007 | 5468007 + | -    | PA4869 | 39  | 31  |
| 5468388 | 5468283 | 5468017 | 5468008 - | -    | PA4870 | 43  | 30  |
| 5468409 | 5468409 | 5469023 | +         | -    | PA4871 | 43  | 31  |
| 5469992 | 5469978 | 5469115 | 5469106 - | -    | PA4872 | 85  | 53  |
| 5470177 | 5470186 | 5471451 | 5471482 + | -    | PA4873 | 59  | 45  |
| 5472063 | 5472042 | 5471626 | 5471606 - | -    | PA4874 | 112 | 74  |
|         | 5472439 | 5472735 | +         | -    | PA4875 | 16  | 15  |
| 5472736 | 5472824 | 5473168 | 5473211 + | osmE | PA4876 | 59  | 42  |
|         | 5473619 | 5473212 | -         | -    | PA4877 | 9   | 8   |
|         | 5473766 | 5474578 | +         | -    | PA4878 | 26  | 18  |
|         | 5476649 | 5474580 | -         | -    | PA4879 | 15  | 13  |
|         | 5476945 | 5477478 | +         | -    | PA4880 | 39  | 29  |
|         | 5477754 | 5478095 | +         | -    | PA4881 | 10  | 11  |
|         | 5478976 | 5478209 | -         | -    | PA4882 | 7   | 2   |
|         | 5479587 | 5478973 | -         | -    | PA4883 | 0   | 0   |
|         | 5480264 | 5479641 | -         | -    | PA4884 | 2   | 3   |

|         |         |         |   |      |        |     |     |
|---------|---------|---------|---|------|--------|-----|-----|
|         | 5480402 | 5481091 | + | irIR | PA4885 | 34  | 19  |
|         | 5481070 | 5482461 | + | -    | PA4886 | 22  | 24  |
| 5483770 | 5483768 | 5482452 | - | -    | PA4887 | 36  | 63  |
|         | 5485100 | 5483988 | - | desB | PA4888 | 72  | 26  |
| 5486211 | 5486197 | 5485097 | - | -    | PA4889 | 103 | 38  |
| 5486296 | 5486356 | 5486985 | + | dest | PA4890 | 75  | 54  |
|         | 5487215 | 5487718 | + | ureE | PA4891 | 17  | 8   |
|         | 5487715 | 5488386 | + | ureF | PA4892 | 6   | 6   |
|         | 5488397 | 5489011 | + | ureG | PA4893 | 11  | 7   |
|         | 5489041 | 5489613 | + | -    | PA4894 | 9   | 3   |
|         | 5490652 | 5489630 | - | -    | PA4895 | 5   | 5   |
|         | 5491181 | 5490645 | - | -    | PA4896 | 6   | 7   |
|         | 5491346 | 5494315 | + | -    | PA4897 | 6   | 6   |
|         | 5495713 | 5494460 | - | opdK | PA4898 | 2   | 2   |
|         | 5497290 | 5495821 | - | -    | PA4899 | 5   | 8   |
|         | 5498653 | 5497313 | - | -    | PA4900 | 3   | 2   |
|         | 5500326 | 5498740 | - | mdlC | PA4901 | 4   | 3   |
|         | 5500427 | 5501323 | + | -    | PA4902 | 13  | 11  |
|         | 5502672 | 5501338 | - | -    | PA4903 | 3   | 3   |
|         | 5503051 | 5504106 | + | vnaA | PA4904 | 7   | 3   |
|         | 5504121 | 5505074 | + | vanB | PA4905 | 7   | 6   |
| 5505847 | 5505784 | 5505071 | - | -    | PA4906 | 79  | 66  |
| 5506622 | 5506609 | 5505848 | - | -    | PA4907 | 167 | 183 |
|         | 5507898 | 5506966 | - | -    | PA4908 | 2   | 3   |
|         | 5508685 | 5507969 | - | -    | PA4909 | 8   | 7   |
|         | 5509554 | 5508682 | - | -    | PA4910 | 1   | 2   |
|         | 5510828 | 5509551 | - | -    | PA4911 | 1   | 1   |
|         | 5511753 | 5510839 | - | -    | PA4912 | 7   | 4   |
|         | 5513112 | 5511988 | - | -    | PA4913 | 6   | 6   |
|         | 5513732 | 5514670 | + | -    | PA4914 | 15  | 7   |
|         | 5514727 | 5516352 | + | -    | PA4915 | 19  | 13  |
| 5517094 | 5517094 | 5516399 | - | -    | PA4916 | 62  | 29  |

|         |         |         |         |   |       |              |      |      |
|---------|---------|---------|---------|---|-------|--------------|------|------|
| 5517739 | 5517711 | 5517109 | 5517095 | - | -     | PA4917       | 113  | 25   |
| 5517804 | 5517821 | 5518480 | 5518480 | + | -     | PA4918       | 647  | 61   |
| 5518481 | 5518483 | 5519682 | 5519682 | + | pncB1 | PA4919       | 244  | 82   |
| 5519683 | 5519711 | 5520538 | 5520557 | + | nadE  | PA4920       | 263  | 152  |
|         | 5520672 | 5521595 |         | + | -     | PA4921       | 43   | 30   |
| 5522238 | 5522110 | 5521664 | 5521645 | - | azu   | PA4922       | 1953 | 2298 |
| 5522374 | 5522386 | 5522973 | 5522973 | + | -     | PA4923       | 153  | 139  |
| 5523712 | 5523681 | 5522986 | 5522981 | - | -     | PA4924       | 79   | 63   |
|         | 5524719 | 5523868 |         | - | -     | PA4925       | 8    | 9    |
|         | 5525905 | 5524970 |         | - | -     | PA4926       | 14   | 11   |
|         | 5528397 | 5525905 |         | - | -     | PA4927       | 8    | 8    |
| 5530934 | 5530902 | 5528659 | 5528650 | - | -     | PA4928       | 105  | 102  |
|         | 5530973 | 5533015 |         | + | -     | PA4929       | 17   | 16   |
| 5534161 | 5534093 | 5533017 | 5533016 | - | alr   | PA4930       | 88   | 86   |
| 5535684 | 5535556 | 5534162 | 5534162 | - | dnab  | PA4931       | 170  | 169  |
| 5536152 | 5536131 | 5535685 | 5535685 | - | rplI  | PA4932       | 5390 | 4471 |
| 5537037 | 5537022 | 5536153 | 5536153 | - | -     | PA4933       | 4475 | 3669 |
| 5537289 | 5537289 | 5537059 | 5537043 | - | rpsR  | PA4934       | 8367 | 6464 |
| 5537835 | 5537738 | 5537319 | 5537290 | - | rpsF  | PA4935       | 9534 | 7714 |
|         | 5538699 | 5537953 | 5537951 | - | -     | PA4936       | 128  | 116  |
| 5541484 | 5541410 | 5538696 |         | - | rnr   | PA4937       | 190  | 139  |
| 5541614 |         |         | 5541700 | + | -     | PA4937.1     | 856  | 2405 |
| 5541830 |         |         | 5541916 | + | -     | PA4937.2     | 453  | 1173 |
| 5543365 | 5543365 | 5542073 | 5542045 | - | purA  | PA4938       | 627  | 601  |
| 5543366 |         |         | 5543415 | ? | -     | predicted RN | 436  | 449  |
| 5544601 | 5544601 | 5543417 | 5543416 | - | -     | PA4939       | 276  | 303  |
| 5544848 | 5544821 | 5544636 | 5544602 | - | -     | PA4940       | 331  | 444  |
|         | 5545786 | 5544917 | 5544917 | - | hflC  | PA4941       | 746  | 741  |
| 5547082 | 5546988 | 5545786 |         | - | hflK  | PA4942       | 788  | 814  |
| 5548385 | 5548384 | 5547083 | 5547083 | - | -     | PA4943       | 787  | 780  |
| 5548659 | 5548645 | 5548397 | 5548395 | - | hfq   | PA4944       | 3127 | 2659 |
| 5548660 |         |         | 5548711 | ? | -     | predicted RN | 1557 | 1598 |

|         |         |         |           |      |        |     |     |
|---------|---------|---------|-----------|------|--------|-----|-----|
| 5549722 | 5549722 | 5548751 | 5548712 - | miaA | PA4945 | 422 | 395 |
|         | 5551681 | 5549780 | 5549723 - | mutL | PA4946 | 186 | 206 |
| 5553116 | 5553108 | 5551681 | -         | amIB | PA4947 | 142 | 171 |
|         | 5553584 | 5553117 | 5553117 - | -    | PA4948 | 83  | 89  |
| 5555080 | 5555080 | 5553572 | -         | -    | PA4949 | 75  | 81  |
| 5555137 | 5555162 | 5556247 | 5556247 + | -    | PA4950 | 81  | 72  |
| 5556826 | 5556823 | 5556281 | 5556248 - | orn  | PA4951 | 183 | 149 |
| 5556935 | 5556935 | 5557954 | 5557957 + | -    | PA4952 | 127 | 128 |
| 5559020 | 5559001 | 5557958 | 5557958 - | motB | PA4953 | 94  | 83  |
| 5559875 | 5559872 | 5559021 | 5559021 - | motA | PA4954 | 132 | 110 |
|         | 5560013 | 5561524 | +         | -    | PA4955 | 42  | 31  |
| 5561594 | 5561599 | 5562414 | 5562417 + | rhda | PA4956 | 98  | 107 |
| 5562418 | 5562418 | 5563287 | 5563287 + | psd  | PA4957 | 143 | 142 |
| 5563964 | 5563965 | 5565428 | 5565469 + | -    | PA4958 | 90  | 49  |
| 5565475 | 5565493 | 5567568 | 5567599 + | fimX | PA4959 | 154 | 138 |
| 5568944 | 5568944 | 5567655 | 5567655 - | -    | PA4960 | 217 | 207 |
| 5569090 | 5569090 | 5570628 | +         | -    | PA4961 | 137 | 117 |
|         | 5570625 | 5571161 | +         | -    | PA4962 | 33  | 31  |
| 5571929 | 5571929 | 5571219 | 5571206 - | -    | PA4963 | 176 | 219 |
| 5574486 | 5574486 | 5572222 | 5572142 - | parC | PA4964 | 192 | 142 |
|         | 5575018 | 5574494 | 5574487 - | -    | PA4965 | 106 | 87  |
|         | 5576028 | 5575015 | -         | -    | PA4966 | 120 | 86  |
| 5577917 | 5577917 | 5576028 | -         | parE | PA4967 | 231 | 185 |
| 5578560 | 5578549 | 5577929 | 5577918 - | -    | PA4968 | 113 | 78  |
| 5579499 | 5579499 | 5578681 | 5578564 - | cpdA | PA4969 | 122 | 62  |
|         | 5580111 | 5579653 | 5579643 - | -    | PA4970 | 118 | 111 |
| 5580740 | 5580719 | 5580102 | -         | aspp | PA4971 | 242 | 205 |
| 5580885 | 5580962 | 5581708 | 5581714 + | -    | PA4972 | 91  | 100 |
|         | 5583645 | 5581762 | -         | thiC | PA4973 | 37  | 34  |
| 5584101 | 5584101 | 5585549 | 5585549 + | -    | PA4974 | 201 | 179 |
| 5586369 | 5586319 | 5585615 | 5585550 - | -    | PA4975 | 34  | 61  |
|         | 5587551 | 5586370 | -         | aruH | PA4976 | 16  | 34  |

|         |         |         |           |      |        |     |     |
|---------|---------|---------|-----------|------|--------|-----|-----|
| 5593456 | 5589253 | 5587574 | -         | arui | PA4977 | 6   | 21  |
|         | 5591385 | 5589295 | -         |      | PA4978 | 6   | 27  |
|         | 5592612 | 5591452 | -         |      | PA4979 | 7   | 36  |
|         | 5593424 | 5592633 | 5592613 - |      | PA4980 | 12  | 25  |
| 5599104 | 5595095 | 5593683 | -         | -    | PA4981 | 4   | 5   |
|         | 5598275 | 5595279 | -         | -    | PA4982 | 5   | 10  |
|         | 5599042 | 5598308 | 5598284 - | -    | PA4983 | 38  | 44  |
|         | 5599807 | 5599160 | 5599160 - | -    | PA4984 | 31  | 18  |
| 5603096 | 5600975 | 5599884 | -         | -    | PA4985 | 16  | 9   |
|         | 5601149 | 5603095 | +         | -    | PA4986 | 14  | 9   |
|         | 5603173 | 5603772 | 5603787 + | -    | PA4987 | 47  | 47  |
|         | 5605098 | 5603821 | 5603821 - | waaa | PA4988 | 55  | 52  |
| 5606482 | 5606018 | 5605134 | -         | -    | PA4989 | 14  | 9   |
|         | 5606103 | 5606435 | +         | -    | PA4990 | 19  | 8   |
|         | 5606496 | 5607671 | +         | -    | PA4991 | 100 | 80  |
|         | 5607668 | 5608480 | 5608648 + | -    | PA4992 | 81  | 71  |
| 5613693 | 5608649 | 5609569 | +         | -    | PA4993 | 26  | 20  |
|         | 5610802 | 5609594 | -         | -    | PA4994 | 6   | 6   |
|         | 5612140 | 5610851 | -         | -    | PA4995 | 17  | 12  |
|         | 5613692 | 5612268 | 5612141 - | rfaE | PA4996 | 235 | 183 |
| 5615544 | 5615544 | 5613733 | 5613706 - | msbA | PA4997 | 192 | 168 |
|         | 5615647 | 5615652 | 5616302 + | -    | PA4998 | 175 | 140 |
|         | 5616310 | 5617515 | 5617533 + | waal | PA4999 | 102 | 100 |
|         | 5618491 | 5617534 | 5617534 - | wapR | PA5000 | 271 | 278 |
| 5619607 | 5619535 | 5618579 | 5618570 - | -    | PA5001 | 195 | 215 |
|         | 5621026 | 5619608 | 5619608 - | -    | PA5002 | 122 | 138 |
|         | 5621926 | 5621030 | 5621027 - | -    | PA5003 | 190 | 190 |
|         | 5623056 | 5621920 | -         | -    | PA5004 | 349 | 334 |
| 5624797 | 5624797 | 5623040 | -         | -    | PA5005 | 491 | 444 |
|         | 5626379 | 5624901 | 5624806 - | -    | PA5006 | 115 | 132 |
|         | 5627134 | 5626376 | -         | -    | PA5007 | 122 | 128 |
|         | 5627865 | 5627131 | -         | -    | PA5008 | 133 | 139 |

|         |         |         |           |       |              |      |      |
|---------|---------|---------|-----------|-------|--------------|------|------|
|         | 5628671 | 5627865 | -         | waap  | PA5009       | 127  | 141  |
|         | 5629789 | 5628668 | -         | waag  | PA5010       | 198  | 202  |
|         | 5630853 | 5629786 | -         | waac  | PA5011       | 150  | 163  |
| 5631930 | 5631887 | 5630850 | -         | waaf  | PA5012       | 200  | 196  |
| 5632910 | 5632870 | 5631947 | 5631938 - | ilve  | PA5013       | 579  | 533  |
| 5632911 |         |         | 5632925 ? | -     | predicted RN | 503  | 533  |
| 5636092 | 5635874 | 5632926 | 5632926 - | gline | PA5014       | 95   | 100  |
| 5636101 | 5636156 | 5638804 | 5638804 + | acee  | PA5015       | 1149 | 1626 |
| 5638805 | 5638949 | 5640592 | 5640592 + | acef  | PA5016       | 825  | 1284 |
| 5640864 | 5641010 | 5643709 | 5643789 + | -     | PA5017       | 50   | 42   |
| 5643803 | 5643803 | 5644450 | 5644450 + | msra  | PA5018       | 129  | 81   |
| 5645383 | 5645290 | 5644454 | 5644451 - | -     | PA5019       | 122  | 118  |
|         | 5645593 | 5647395 | +         | -     | PA5020       | 18   | 5    |
| 5647604 | 5647814 | 5649430 | 5649450 + | -     | PA5021       | 48   | 46   |
| 5649473 | 5649522 | 5652878 | 5652885 + | -     | PA5022       | 54   | 56   |
|         | 5652945 | 5654405 | +         | -     | PA5023       | 19   | 10   |
| 5654406 | 5654811 | 5655527 | 5655614 + | -     | PA5024       | 9    | 28   |
|         | 5655648 | 5656925 | +         | metv  | PA5025       | 30   | 25   |
|         | 5657016 | 5657468 | +         | -     | PA5026       | 11   | 11   |
| 5657561 | 5657581 | 5658396 | 5658411 + | -     | PA5027       | 141  | 58   |
| 5659197 | 5659185 | 5658418 | 5658416 - | -     | PA5028       | 163  | 110  |
|         | 5660181 | 5659276 | -         | -     | PA5029       | 31   | 22   |
| 5660284 | 5660357 | 5661673 | 5661700 + | -     | PA5030       | 23   | 167  |
|         | 5662630 | 5661701 | -         | -     | PA5031       | 5    | 11   |
|         | 5662742 | 5663815 | +         | -     | PA5032       | 3    | 2    |
|         | 5663889 | 5664869 | +         | -     | PA5033       | 44   | 18   |
| 5666103 | 5666057 | 5664990 | 5664990 - | heme  | PA5034       | 128  | 151  |
| 5667667 | 5667667 | 5666234 | 5666109 - | gltd  | PA5035       | 64   | 54   |
| 5672272 | 5672141 | 5667696 | 5667668 - | gltb  | PA5036       | 68   | 49   |
| 5674027 | 5674021 | 5672366 | 5672360 - | -     | PA5037       | 209  | 221  |
| 5675183 | 5675134 | 5674028 | 5674028 - | arob  | PA5038       | 117  | 114  |
| 5675702 | 5675702 | 5675184 | 5675184 - | arok  | PA5039       | 229  | 197  |

|         |         |         |           |       |              |      |      |
|---------|---------|---------|-----------|-------|--------------|------|------|
| 5677858 | 5677858 | 5675714 | 5675703 - | pilQ  | PA5040       | 406  | 244  |
|         | 5678436 | 5677912 | 5677859 - | pilP  | PA5041       | 350  | 167  |
|         | 5679056 | 5678433 | -         | pilO  | PA5042       | 456  | 210  |
|         | 5679649 | 5679053 | -         | pilN  | PA5043       | 540  | 223  |
| 5680738 | 5680713 | 5679649 | -         | pilM  | PA5044       | 505  | 184  |
| 5680746 | 5680898 | 5683366 | 5683368 + | ponA  | PA5045       | 97   | 87   |
| 5684763 | 5684739 | 5683471 | 5683457 - | -     | PA5046       | 843  | 1147 |
|         | 5686281 | 5684842 | 5684764 - | -     | PA5047       | 80   | 101  |
| 5687100 | 5687045 | 5686278 | -         | -     | PA5048       | 133  | 150  |
| 5687350 | 5687320 | 5687105 | 5687104 - | rpmE  | PA5049       | 5933 | 6474 |
| 5687351 |         |         | 5687368 ? | -     | predicted RN | 2364 | 2747 |
| 5687432 | 5687496 | 5689715 | 5689847 + | priA  | PA5050       | 34   | 32   |
| 5689964 | 5689964 | 5691727 | 5691754 + | argS  | PA5051       | 256  | 234  |
| 5691762 | 5691762 | 5692457 | 5692554 + | -     | PA5052       | 111  | 102  |
| 5692574 | 5692576 | 5693109 | 5693109 + | hslV  | PA5053       | 207  | 240  |
| 5693135 | 5693138 | 5694481 | 5694492 + | hslU  | PA5054       | 311  | 310  |
| 5694516 | 5694576 | 5694947 | 5694947 + | -     | PA5055       | 121  | 112  |
|         | 5695366 | 5697045 | 5697045 + | phcC1 | PA5056       | 29   | 25   |
|         | 5697198 | 5698055 | +         | phd   | PA5057       | 23   | 18   |
|         | 5698359 | 5700041 | +         | phcC2 | PA5058       | 12   | 8    |
|         | 5700097 | 5700714 | +         | -     | PA5059       | 17   | 15   |
| 5701697 | 5701687 | 5700758 | 5700752 - | phfF  | PA5060       | 371  | 242  |
| 5702114 | 5702114 | 5701698 | 5701698 - | -     | PA5061       | 209  | 167  |
| 5702541 | 5702533 | 5702258 | 5702193 - | -     | PA5062       | 158  | 88   |
| 5702669 | 5702669 | 5703439 | 5703439 + | ubIE  | PA5063       | 269  | 221  |
| 5703440 | 5703454 | 5704080 | +         | -     | PA5064       | 116  | 90   |
|         | 5704077 | 5705678 | 5705793 + | ubiB  | PA5065       | 71   | 70   |
| 5705794 | 5705794 | 5706198 | +         | hsl   | PA5066       | 251  | 187  |
|         | 5706191 | 5706526 | 5706551 + | hse   | PA5067       | 253  | 251  |
| 5706552 | 5706552 | 5706800 | 5706813 + | tatA  | PA5068       | 365  | 336  |
| 5706814 | 5706814 | 5707239 | +         | tatB  | PA5069       | 200  | 221  |
|         | 5707236 | 5708039 | +         | tatC  | PA5070       | 121  | 159  |

|         |         |         |           |      |        |     |     |
|---------|---------|---------|-----------|------|--------|-----|-----|
|         | 5708036 | 5708743 | 5708954 + | -    | PA5071 | 40  | 48  |
| 5708955 | 5708955 | 5710898 | 5711007 + | -    | PA5072 | 46  | 44  |
| 5711008 | 5711008 | 5711469 | 5711473 + | -    | PA5073 | 90  | 83  |
|         | 5712211 | 5711477 | 5711474 - | -    | PA5074 | 143 | 129 |
| 5713229 | 5713166 | 5712204 | -         | -    | PA5075 | 138 | 139 |
| 5714169 | 5714032 | 5713232 | 5713232 - | -    | PA5076 | 244 | 268 |
|         | 5716855 | 5714270 | 5714270 - | mdoH | PA5077 | 186 | 170 |
| 5718425 | 5718425 | 5716848 | -         | -    | PA5078 | 385 | 335 |
|         | 5719319 | 5718882 | 5718426 - | -    | PA5079 | 93  | 91  |
| 5720332 | 5720287 | 5719316 | -         | -    | PA5080 | 147 | 156 |
|         | 5720469 | 5720945 | +         | -    | PA5081 | 17  | 15  |
|         | 5721849 | 5720950 | -         | -    | PA5082 | 20  | 22  |
|         | 5722242 | 5721892 | -         | -    | PA5083 | 11  | 10  |
|         | 5723517 | 5722267 | -         | -    | PA5084 | 8   | 4   |
|         | 5723582 | 5724538 | +         | -    | PA5085 | 39  | 24  |
|         | 5725242 | 5724601 | 5724601 - | -    | PA5086 | 33  | 29  |
| 5726348 | 5726348 | 5725479 | 5725479 - | -    | PA5087 | 28  | 25  |
|         | 5727238 | 5726357 | -         | -    | PA5088 | 23  | 19  |
|         | 5729476 | 5727239 | -         | -    | PA5089 | 9   | 8   |
|         | 5731845 | 5729473 | -         | -    | PA5090 | 8   | 8   |
|         | 5732916 | 5732116 | -         | hutG | PA5091 | 16  | 12  |
|         | 5734117 | 5732909 | -         | hutI | PA5092 | 14  | 11  |
|         | 5735646 | 5734114 | -         | -    | PA5093 | 7   | 7   |
|         | 5736473 | 5735643 | -         | -    | PA5094 | 11  | 7   |
|         | 5737321 | 5736470 | -         | -    | PA5095 | 11  | 7   |
|         | 5738314 | 5737346 | -         | -    | PA5096 | 7   | 4   |
|         | 5739835 | 5738432 | -         | -    | PA5097 | 4   | 4   |
|         | 5741427 | 5739898 | -         | huth | PA5098 | 4   | 2   |
|         | 5742966 | 5741524 | -         | -    | PA5099 | 3   | 1   |
|         | 5744753 | 5743074 | -         | hutU | PA5100 | 9   | 4   |
|         | 5745876 | 5745079 | -         | -    | PA5101 | 9   | 3   |
|         | 5746833 | 5745895 | -         | -    | PA5102 | 4   | 3   |

|         |         |         |   |       |        |      |      |
|---------|---------|---------|---|-------|--------|------|------|
|         | 5747871 | 5746849 | - | -     | PA5103 | 10   | 8    |
|         | 5748603 | 5748013 | - | -     | PA5104 | 24   | 25   |
| 5749430 | 5749352 | 5748600 | - | hutC  | PA5105 | 45   | 35   |
|         | 5749453 | 5750814 | + | -     | PA5106 | 10   | 5    |
|         | 5751530 | 5750961 | - | bic   | PA5107 | 90   | 93   |
| 5751856 | 5751784 | 5751527 | - | -     | PA5108 | 158  | 156  |
| 5752463 | 5752459 | 5751857 | - | -     | PA5109 | 202  | 171  |
| 5753489 | 5753474 | 5752464 | - | fbp   | PA5110 | 541  | 542  |
| 5754246 | 5754144 | 5753614 | - | gloA3 | PA5111 | 141  | 149  |
| 5756298 | 5756238 | 5754298 | - | estA  | PA5112 | 120  | 156  |
|         | 5757741 | 5756347 | - | -     | PA5113 | 83   | 83   |
| 5761408 | 5761343 | 5757738 | - | -     | PA5114 | 60   | 62   |
|         | 5762066 | 5761482 | - | -     | PA5115 | 10   | 5    |
|         | 5762150 | 5762575 | + | -     | PA5116 | 24   | 8    |
| 5764478 | 5764476 | 5762659 | - | typA  | PA5117 | 450  | 333  |
| 5766167 | 5766147 | 5764693 | - | thil  | PA5118 | 190  | 209  |
| 5766310 | 5766484 | 5767893 | + | glnA  | PA5119 | 691  | 818  |
| 5767975 | 5768041 | 5768445 | + | -     | PA5120 | 57   | 69   |
| 5770774 | 5770649 | 5768442 | - | -     | PA5121 | 33   | 43   |
| 5770937 | 5770937 | 5771458 | + | -     | PA5122 | 117  | 46   |
|         | 5771455 | 5772027 | + | -     | PA5123 | 43   | 21   |
|         | 5772298 | 5773374 | + | ntrB  | PA5124 | 23   | 29   |
|         | 5773377 | 5774807 | + | ntrC  | PA5125 | 32   | 30   |
|         | 5776087 | 5775620 | - | -     | PA5126 | 38   | 31   |
|         | 5776086 | 5776547 | + | -     | PA5127 | 83   | 111  |
| 5777103 | 5777097 | 5776606 | - | secB  | PA5128 | 1635 | 1286 |
| 5777388 | 5777388 | 5777134 | - | grx   | PA5129 | 383  | 310  |
| 5777816 | 5777809 | 5777390 | - | -     | PA5130 | 268  | 303  |
| 5777961 | 5778134 | 5779681 | + | pgm   | PA5131 | 268  | 251  |
|         | 5779995 | 5780813 | + | -     | PA5132 | 13   | 19   |
| 5780953 | 5780963 | 5782249 | + | -     | PA5133 | 117  | 118  |
| 5782250 | 5782278 | 5783588 | + | -     | PA5134 | 209  | 189  |

|         |         |         |   |       |          |     |     |
|---------|---------|---------|---|-------|----------|-----|-----|
| 5783588 | 5784361 | 5784429 | + | -     | PA5135   | 60  | 62  |
| 5784430 | 5784430 | 5785911 | + | -     | PA5136   | 91  | 92  |
| 5786852 | 5786703 | 5785948 | - | -     | PA5137   | 72  | 59  |
| 5787610 | 5787605 | 5786853 | - | -     | PA5138   | 215 | 135 |
| 5788504 | 5788442 | 5787696 | - | -     | PA5139   | 234 | 89  |
| 5789384 | 5789384 | 5788614 | - | hisF1 | PA5140   | 194 | 176 |
| 5790295 | 5790132 | 5789395 | - | hisA  | PA5141   | 231 | 229 |
| 5791690 | 5791086 | 5790445 | - | hisH1 | PA5142   | 286 | 263 |
|         | 5791676 | 5791083 | - | hisB  | PA5143   | 386 | 367 |
|         | 5791837 | 5792235 | + | -     | PA5144   | 8   | 12  |
|         | 5792505 | 5793611 | + | -     | PA5145   | 22  | 17  |
| 5793692 | 5793705 | 5795957 | + | -     | PA5146   | 130 | 130 |
|         | 5795954 | 5797021 | + | mutY  | PA5147   | 128 | 131 |
| 5797048 | 5797065 | 5797337 | + | -     | PA5148   | 294 | 260 |
| 5797365 | 5797365 | 5798447 | + | -     | PA5149   | 69  | 58  |
| 5798560 |         | 5798635 | + | -     | PA5149.1 | 20  | 35  |
| 5799479 | 5799430 | 5798693 | - | -     | PA5150   | 43  | 36  |
|         | 5799589 | 5800278 | + | -     | PA5151   | 22  | 19  |
| 5800496 | 5800527 | 5801300 | + | -     | PA5152   | 249 | 234 |
| 5801315 | 5801315 | 5802067 | + | -     | PA5153   | 207 | 378 |
| 5802105 | 5802129 | 5802824 | + | -     | PA5154   | 43  | 101 |
|         | 5802821 | 5803513 | + | -     | PA5155   | 15  | 35  |
| 5803574 | 5803867 | 5804802 | + | -     | PA5156   | 47  | 43  |
| 5804807 | 5805206 | 5805676 | + | -     | PA5157   | 31  | 36  |
|         | 5805680 | 5807158 | + | -     | PA5158   | 18  | 20  |
|         | 5807173 | 5808357 | + | -     | PA5159   | 23  | 27  |
|         | 5808368 | 5809897 | + | -     | PA5160   | 10  | 17  |
| 5809970 |         | 5810045 | + | -     | PA5160.1 | 8   | 33  |
| 5810148 | 5810281 | 5811339 | + | rmIB  | PA5161   | 306 | 257 |
|         | 5811336 | 5812244 | + | rmID  | PA5162   | 262 | 205 |
|         | 5812241 | 5813122 | + | rmIA  | PA5163   | 410 | 331 |
|         | 5813122 | 5813667 | + | rmIC  | PA5164   | 340 | 289 |

|         |         |         |           |      |              |     |      |
|---------|---------|---------|-----------|------|--------------|-----|------|
| 5813698 | 5813727 | 5815565 | +         | -    | PA5165       | 44  | 34   |
|         | 5815562 | 5816950 | 5816978 + | -    | PA5166       | 56  | 55   |
| 5817105 | 5817191 | 5818186 | 5818186 + | -    | PA5167       | 45  | 189  |
| 5818187 | 5818202 | 5818834 | +         | -    | PA5168       | 19  | 75   |
|         | 5818831 | 5820114 | 5820564 + | -    | PA5169       | 10  | 78   |
| 5820904 | 5820910 | 5822358 | 5822358 + | arcD | PA5170       | 986 | 902  |
| 5822359 | 5822380 | 5823636 | 5823715 + | arcA | PA5171       | 239 | 1520 |
| 5823716 | 5823716 | 5824726 | 5824726 + | arcB | PA5172       | 203 | 2193 |
| 5824727 | 5824787 | 5825719 | 5825726 + | arcC | PA5173       | 109 | 1333 |
| 5826030 | 5826135 | 5828039 | 5828039 + | -    | PA5174       | 269 | 393  |
|         | 5828907 | 5828086 | 5828066 - | cysQ | PA5175       | 93  | 84   |
| 5829470 | 5829470 | 5828904 | -         | -    | PA5176       | 199 | 173  |
| 5829527 | 5829596 | 5830261 | 5830307 + | -    | PA5177       | 64  | 55   |
| 5830800 | 5830750 | 5830313 | 5830313 - | -    | PA5178       | 314 | 251  |
|         | 5830924 | 5831805 | +         | -    | PA5179       | 27  | 21   |
|         | 5831902 | 5832741 | +         | -    | PA5180       | 14  | 9    |
|         | 5832749 | 5835070 | +         | -    | PA5181       | 14  | 8    |
| 5835480 |         |         | 5835082 - | -    | PA5181.1     | 38  | 27   |
| 5835481 | 5835482 | 5835895 | 5835903 + | -    | PA5182       | 83  | 71   |
| 5835982 | 5835994 | 5836401 | 5836419 + | -    | PA5183       | 57  | 45   |
| 5836465 | 5836910 | 5837467 | +         | -    | PA5184       | 71  | 52   |
|         | 5837892 | 5837449 | -         | -    | PA5185       | 40  | 20   |
|         | 5839078 | 5837915 | -         | -    | PA5186       | 12  | 8    |
|         | 5840895 | 5839105 | -         | -    | PA5187       | 11  | 6    |
|         | 5842132 | 5840897 | -         | -    | PA5188       | 12  | 9    |
| 5842188 | 5842275 | 5843183 | 5843197 + | -    | PA5189       | 47  | 41   |
| 5843909 | 5843800 | 5843198 | 5843198 - | -    | PA5190       | 91  | 80   |
|         | 5844054 | 5844410 | +         | -    | PA5191       | 43  | 35   |
| 5846009 | 5846009 | 5844468 | 5844456 - | pckA | PA5192       | 877 | 740  |
| 5846010 |         |         | 5846019 ? | -    | predicted RN | 483 | 502  |
| 5847103 | 5847018 | 5846125 | 5846021 - | yrfI | PA5193       | 195 | 172  |
| 5847121 | 5847131 | 5847934 | 5847934 + | -    | PA5194       | 188 | 185  |

|         |         |         |         |   |       |        |     |     |
|---------|---------|---------|---------|---|-------|--------|-----|-----|
| 5848486 | 5848367 | 5847972 | 5847935 | - | -     | PA5195 | 54  | 44  |
| 5848501 | 5848577 | 5849011 | 5849142 | + | -     | PA5196 | 43  | 39  |
|         | 5849143 | 5850048 |         | + | rimK  | PA5197 | 24  | 19  |
| 5850049 | 5850239 | 5851162 | 5851162 | + | -     | PA5198 | 74  | 58  |
| 5852652 | 5852558 | 5851239 | 5851174 | - | amgS  | PA5199 | 50  | 49  |
| 5853398 | 5853396 | 5852653 | 5852653 | - | amgR  | PA5200 | 207 | 173 |
| 5853563 | 5853585 | 5855924 | 5855935 | + | -     | PA5201 | 265 | 239 |
| 5855936 | 5855936 | 5856325 | 5856531 | + | -     | PA5202 | 130 | 126 |
| 5856532 | 5856532 | 5858115 | 5858116 | + | gshA  | PA5203 | 120 | 114 |
| 5859580 | 5859456 | 5858158 | 5858158 | - | argA  | PA5204 | 134 | 56  |
|         | 5859793 | 5860494 |         | + | -     | PA5205 | 30  | 26  |
| 5861632 | 5861621 | 5860467 |         | - | argE  | PA5206 | 49  | 32  |
|         | 5862989 | 5861721 | 5861721 | - | -     | PA5207 | 19  | 35  |
| 5863714 | 5863711 | 5863034 | 5862990 | - | -     | PA5208 | 228 | 175 |
| 5863715 | 5863825 | 5865189 | 5865226 | + | -     | PA5209 | 72  | 53  |
| 5865227 | 5865227 | 5867011 | 5867190 | + | -     | PA5210 | 102 | 60  |
|         | 5867233 | 5867685 |         | + | -     | PA5211 | 20  | 21  |
| 5867748 | 5867817 | 5868146 | 5868180 | + | -     | PA5212 | 82  | 76  |
|         | 5871057 | 5868181 |         | - | gcvP1 | PA5213 | 15  | 17  |
| 5871648 | 5871620 | 5871231 | 5871189 | - | gcvH1 | PA5214 | 669 | 656 |
| 5872775 | 5872749 | 5871667 | 5871660 | - | gcvT1 | PA5215 | 259 | 311 |
| 5874586 | 5874519 | 5872900 | 5872782 | - | -     | PA5216 | 39  | 38  |
| 5875595 | 5875585 | 5874587 | 5874587 | - | -     | PA5217 | 148 | 147 |
|         | 5876567 | 5875653 |         | - | -     | PA5218 | 19  | 14  |
|         | 5876664 | 5877857 |         | + | -     | PA5219 | 17  | 14  |
|         | 5877896 | 5878717 |         | + | -     | PA5220 | 35  | 29  |
| 5879999 | 5879971 | 5878754 | 5878718 | - | -     | PA5221 | 83  | 80  |
| 5880486 | 5880482 | 5880000 | 5880000 | - | -     | PA5222 | 95  | 104 |
| 5881671 | 5881671 | 5880487 | 5880487 | - | ubiH  | PA5223 | 164 | 157 |
| 5883020 | 5883013 | 5881679 | 5881672 | - | pepP  | PA5224 | 299 | 248 |
| 5883595 | 5883577 | 5883023 | 5883021 | - | -     | PA5225 | 192 | 140 |
| 5883664 | 5883664 | 5883975 |         | + | -     | PA5226 | 250 | 151 |

|         |         |         |           |      |              |      |      |
|---------|---------|---------|-----------|------|--------------|------|------|
| 5884320 | 5883972 | 5884286 | 5884319 + | -    | PA5227       | 217  | 140  |
| 5884503 | 5884508 | 5885119 | 5884502 + | ssrS | PA5227.1     | 4685 | 6456 |
| 5885471 | 5885486 | 5885944 | 5885376 + | -    | PA5228       | 97   | 79   |
| 5887078 | 5887078 | 5885954 | 5885953 + | -    | PA5229       | 70   | 105  |
|         | 5889832 | 5887082 | 5885954 - | -    | PA5230       | 48   | 93   |
| 5890951 | 5890902 | 5889829 | 5887079 - | -    | PA5231       | 70   | 118  |
| 5891593 | 5891528 | 5891109 | -         | -    | PA5232       | 294  | 257  |
|         | 5891683 | 5892660 | 5890961 - | -    | PA5233       | 93   | 65   |
| 5892907 | 5892910 | 5894256 | + +       | -    | PA5234       | 32   | 20   |
|         | 5895261 | 5894293 | 5894256 + | glpT | PA5235       | 229  | 77   |
| 5896729 | 5896727 | 5895261 | 5894257 - | -    | PA5236       | 131  | 92   |
|         | 5898794 | 5896806 | -         | -    | PA5237       | 171  | 138  |
| 5900253 | 5900124 | 5898865 | -         | -    | PA5238       | 11   | 9    |
| 5900727 | 5900695 | 5900369 | 5898855 - | rho  | PA5239       | 699  | 539  |
| 5900858 | 5900879 | 5902399 | 5900348 - | trxA | PA5240       | 2520 | 1925 |
| 5904596 | 5904596 | 5902386 | + +       | ppx  | PA5241       | 222  | 173  |
| 5905655 | 5905627 | 5904614 | -         | ppk  | PA5242       | 278  | 251  |
| 5905866 | 5905871 | 5906461 | 5904597 - | hemB | PA5243       | 440  | 350  |
| 5906623 | 5906626 | 5907294 | 5906500 + | -    | PA5244       | 102  | 103  |
| 5907331 | 5907390 | 5907863 | 5907294 + | -    | PA5245       | 243  | 176  |
| 5908396 | 5908330 | 5907848 | + +       | -    | PA5246       | 64   | 57   |
| 5910302 | 5910298 | 5908397 | -         | -    | PA5247       | 81   | 73   |
| 5911203 | 5911032 | 5910403 | 5908397 - | -    | PA5248       | 65   | 80   |
| 5912020 | 5912020 | 5911262 | 5910306 - | -    | PA5249       | 45   | 28   |
|         | 5912605 | 5912027 | 5911206 - | -    | PA5250       | 154  | 170  |
| 5914522 | 5914521 | 5912605 | 5912025 - | -    | PA5251       | 82   | 87   |
| 5914985 |         |         | -         | -    | PA5252       | 125  | 131  |
| 5916106 | 5916101 | 5915043 | 5915042 ? | -    | predicted RN | 328  | 222  |
|         | 5916227 | 5916856 | 5915043 - | algP | PA5253       | 956  | 619  |
| 5917497 | 5917400 | 5916918 | + +       | -    | PA5254       | 38   | 32   |
| 5918289 | 5918171 | 5917680 | 5916857 - | algQ | PA5255       | 701  | 452  |
|         |         |         | 5917504 - | dsbH | PA5256       | 86   | 96   |

|         |         |         |         |   |      |              |      |      |
|---------|---------|---------|---------|---|------|--------------|------|------|
| 5920715 | 5919588 | 5918350 | 5918350 | - | -    | PA5257       | 148  | 141  |
| 5920715 | 5920715 | 5919585 | -       | - | -    | PA5258       | 142  | 137  |
| 5922438 | 5921497 | 5920742 | 5920716 | - | hemD | PA5259       | 76   | 73   |
| 5923294 | 5922435 | 5921494 | -       | - | hemC | PA5260       | 198  | 150  |
| 5924404 | 5923290 | 5922544 | 5922441 | - | algR | PA5261       | 145  | 113  |
| 5924562 | 5924371 | 5923295 | 5923295 | - | algZ | PA5262       | 78   | 41   |
| 5927335 | 5924596 | 5925990 | 5926133 | + | argH | PA5263       | 204  | 158  |
|         | 5927105 | 5926134 | 5926134 | - | -    | PA5264       | 65   | 52   |
|         | 5930605 | 5927336 | -       | - | -    | PA5265       | 22   | 12   |
|         | 5932677 | 5930602 | -       | - | -    | PA5266       | 6    | 5    |
|         | 5933395 | 5932877 | -       | - | hcpB | PA5267       | 10   | 9    |
| 5934700 | 5934668 | 5933688 | 5933396 | - | corA | PA5268       | 60   | 41   |
| 5934735 | 5934770 | 5935045 | 5935045 | + | -    | PA5269       | 115  | 75   |
| 5935046 | 5935064 | 5935945 | 5935959 | + | -    | PA5270       | 73   | 61   |
| 5935988 | 5935988 | 5936221 | 5936222 | + | -    | PA5271       | 105  | 76   |
|         | 5936370 | 5939222 | +       | + | cyaA | PA5272       | 29   | 30   |
| 5939263 | 5939263 | 5939976 | +       | + | -    | PA5273       | 37   | 24   |
| 5940455 | 5940424 | 5940020 | 5940020 | - | rnk  | PA5274       | 466  | 488  |
| 5941133 | 5941082 | 5940747 | 5940474 | - | -    | PA5275       | 88   | 59   |
| 5941328 | 5941336 | 5941476 | 5941486 | + | lppl | PA5276       | 336  | 336  |
| 5941487 | 5941487 | 5942734 | 5942744 | + | lysA | PA5277       | 281  | 269  |
| 5942745 | 5942745 | 5943575 | 5943595 | + | dapF | PA5278       | 275  | 266  |
| 5943606 | 5943606 | 5944307 | 5944307 | + | -    | PA5279       | 269  | 228  |
| 5944308 | 5944327 | 5945238 | +       | + | sss  | PA5280       | 76   | 65   |
|         | 5945235 | 5945933 | 5945962 | + | -    | PA5281       | 34   | 33   |
|         | 5947132 | 5945963 | -       | - | -    | PA5282       | 6    | 3    |
|         | 5947295 | 5948671 | +       | + | -    | PA5283       | 39   | 26   |
|         | 5949610 | 5948696 | -       | - | -    | PA5284       | 12   | 13   |
| 5950365 | 5950351 | 5950034 | 5950024 | - | -    | PA5285       | 1724 | 1789 |
| 5950366 |         |         | 5950395 | ? | -    | predicted RN | 1202 | 1518 |
| 5950866 | 5950854 | 5950429 | 5950396 | - | -    | PA5286       | 369  | 586  |
| 5952446 | 5952443 | 5951115 | 5951045 | - | amtB | PA5287       | 63   | 48   |

|         |         |         |         |   |      |          |      |      |
|---------|---------|---------|---------|---|------|----------|------|------|
| 5952854 | 5952821 | 5952483 | 5952458 | - | glnk | PA5288   | 758  | 395  |
| 5953250 | 5953261 | 5953521 | 5953561 | + | -    | PA5289   | 136  | 135  |
| 5955056 | 5953562 | 5955055 |         | + | -    | PA5290   | 28   | 21   |
|         | 5955180 | 5957165 | 5957183 | + | -    | PA5291   | 112  | 57   |
|         | 5958257 | 5957208 |         | - | pchp | PA5292   | 29   | 15   |
|         | 5959325 | 5958408 |         | - | -    | PA5293   | 18   | 10   |
|         | 5959474 | 5960940 |         | + | -    | PA5294   | 15   | 10   |
| 5962567 | 5962528 | 5960852 |         | - | -    | PA5295   | 116  | 91   |
| 5962701 | 5962716 | 5964725 | 5964725 | + | rep  | PA5296   | 158  | 186  |
|         | 5964859 | 5966577 |         | + | poxB | PA5297   | 9    | 9    |
| 5966688 | 5966706 | 5967278 | 5967285 | + | -    | PA5298   | 453  | 622  |
| 5969354 | 5969145 | 5967286 | 5967286 | - | -    | PA5299   | 66   | 76   |
| 5969827 | 5969765 | 5969355 | 5969355 | - | cycB | PA5300   | 1040 | 1219 |
| 5970601 | 5970535 | 5969987 | 5969963 | - | -    | PA5301   | 416  | 355  |
| 5971849 | 5971759 | 5970686 | 5970686 | - | dadX | PA5302   | 190  | 483  |
|         | 5972203 | 5971850 | 5971850 | - | -    | PA5303   | 644  | 1618 |
| 5973516 | 5973476 | 5972178 |         | - | dadA | PA5304   | 579  | 1153 |
| 5974177 | 5974177 | 5973833 | 5973809 | - | -    | PA5305   | 177  | 111  |
| 5974401 | 5974381 | 5974190 | 5974178 | - | -    | PA5306   | 225  | 170  |
|         | 5976969 | 5974402 | 5974402 | - | -    | PA5307   | 38   | 26   |
| 5977115 | 5977123 | 5977611 | 5977611 | + | lrp  | PA5308   | 164  | 94   |
| 5977618 | 5977789 | 5979108 | 5979193 | + | -    | PA5309   | 58   | 35   |
|         | 5979194 | 5980783 |         | + | -    | PA5310   | 25   | 29   |
|         | 5981950 | 5980787 |         | - | -    | PA5311   | 24   | 10   |
| 5983617 | 5983590 | 5982097 | 5982062 | - | -    | PA5312   | 255  | 91   |
| 5983796 | 5983820 | 5985154 | 5985177 | + | -    | PA5313   | 59   | 26   |
| 5985219 | 5985219 | 5985581 | 5985634 | + | -    | PA5314   | 93   | 35   |
| 5985871 | 5985871 | 5985716 | 5985688 | - | rpmG | PA5315   | 6516 | 5334 |
|         | 5986119 | 5985883 | 5985872 | - | rpmB | PA5316   | 8525 | 7570 |
| 5986120 |         |         | 5986170 | + | -    | PA5316.1 | 6315 | 7126 |
| 5986171 | 5986475 | 5988055 | 5988080 | + | -    | PA5317   | 59   | 33   |

|         |         |         |   |      |              |      |      |
|---------|---------|---------|---|------|--------------|------|------|
| 5988081 | 5988081 | 5988629 | + | -    | PA5318       | 37   | 21   |
| 5989354 | 5989320 | 5988646 | - | radC | PA5319       | 54   | 40   |
| 5989420 | 5989460 | 5990668 | + | coaC | PA5320       | 165  | 151  |
| 5990669 | 5990676 | 5991131 | + | dut  | PA5321       | 249  | 228  |
| 5992383 | 5992383 | 5993774 | + | algC | PA5322       | 356  | 304  |
| 5993775 | 5993791 | 5994696 | + | argB | PA5323       | 349  | 327  |
| 5995861 | 5995811 | 5994741 | - | -    | PA5324       | 62   | 73   |
|         | 5996036 | 5996986 | + | -    | PA5325       | 5    | 5    |
|         | 5998265 | 5997057 | - | -    | PA5326       | 4    | 3    |
|         | 5999676 | 5998348 | - | -    | PA5327       | 4    | 3    |
|         | 6000143 | 5999754 | - | -    | PA5328       | 2    | 2    |
| 6000287 | 6000317 | 6000781 | + | -    | PA5329       | 71   | 54   |
| 6001378 | 6001378 | 6000761 | - | -    | PA5330       | 261  | 374  |
| 6002068 | 6002040 | 6001399 | - | pyrE | PA5331       | 407  | 868  |
| 6002114 | 6002121 | 6002900 | + | crc  | PA5332       | 652  | 0    |
| 6003333 | 6003330 | 6002959 | - | -    | PA5333       | 276  | 260  |
| 6004102 | 6004096 | 6003377 | - | rph  | PA5334       | 340  | 281  |
| 6004235 | 6004277 | 6005140 | + | -    | PA5335       | 186  | 181  |
| 6005198 | 6005199 | 6005810 | + | gmk  | PA5336       | 187  | 175  |
| 6005870 | 6005899 | 6006181 | + | rpoZ | PA5337       | 1441 | 1272 |
| 6006182 |         | 6006230 | ? | -    | predicted RN | 968  | 884  |
| 6006231 | 6006231 | 6008336 | + | spot | PA5338       | 346  | 344  |
| 6008397 | 6008398 | 6008778 | + | -    | PA5339       | 1283 | 1064 |
| 6008783 | 6008833 | 6009564 | + | -    | PA5340       | 329  | 339  |
| 6010191 | 6010191 | 6009571 | - | -    | PA5341       | 40   | 43   |
|         | 6011058 | 6010258 | - | -    | PA5342       | 42   | 31   |
| 6011918 | 6011909 | 6011058 | - | -    | PA5343       | 87   | 58   |
| 6012047 | 6012047 | 6012979 | + | oxyR | PA5344       | 256  | 180  |
|         | 6012976 | 6015051 | + | recG | PA5345       | 108  | 85   |
| 6015141 | 6015141 | 6016550 | + | -    | PA5346       | 213  | 125  |
| 6017020 | 6017014 | 6016622 | - | -    | PA5347       | 188  | 221  |
| 6017502 | 6017422 | 6017150 | - | -    | PA5348       | 659  | 1583 |

|         |         |         |         |   |       |          |      |      |
|---------|---------|---------|---------|---|-------|----------|------|------|
| 6018778 | 6018778 | 6017624 | 6017509 | - | -     | PA5349   | 104  | 70   |
| 6019080 | 6018997 | 6018830 | 6018779 | - | rubA2 | PA5350   | 141  | 105  |
| 6019366 | 6019348 | 6019181 | 6019181 | - | rubA1 | PA5351   | 534  | 455  |
|         | 6019883 | 6019482 | -       | - | -     | PA5352   | 1    | 1    |
|         | 6021114 | 6019888 | -       | - | glcF  | PA5353   | 2    | 1    |
|         | 6022203 | 6021124 | -       | - | glcE  | PA5354   | 4    | 3    |
|         | 6023702 | 6022203 | -       | - | glcD  | PA5355   | 7    | 6    |
|         | 6023907 | 6024662 | 6024662 | + | glcC  | PA5356   | 36   | 13   |
| 6024726 | 6024742 | 6025278 | 6025304 | + | -     | PA5357   | 52   | 46   |
| 6025305 | 6025305 | 6026195 | 6026195 | + | ubiA  | PA5358   | 74   | 78   |
| 6026764 | 6026674 | 6026219 | 6026196 | - | -     | PA5359   | 63   | 48   |
| 6026779 | 6026779 | 6027468 | 6027541 | + | phoB  | PA5360   | 74   | 80   |
|         | 6027542 | 6028873 | +       | + | phoR  | PA5361   | 22   | 18   |
| 6028965 | 6028976 | 6030316 | 6030321 | + | -     | PA5362   | 115  | 91   |
| 6031365 | 6031250 | 6030351 | 6030322 | - | -     | PA5363   | 92   | 52   |
| 6032270 | 6032268 | 6031366 | 6031366 | - | -     | PA5364   | 167  | 112  |
| 6033115 | 6033115 | 6032387 | 6032387 | - | phoU  | PA5365   | 85   | 55   |
| 6034059 | 6034044 | 6033211 | 6033139 | - | pstB  | PA5366   | 90   | 67   |
| 6035736 | 6035736 | 6034060 | 6034060 | - | pstA  | PA5367   | 41   | 40   |
| 6038135 | 6037789 | 6035756 | 6035737 | - | pstC  | PA5368   | 42   | 42   |
| 6039226 | 6039183 | 6038212 | 6038169 | - | pstS  | PA5369   | 97   | 83   |
| 6039703 |         |         | 6039584 | - | -     | PA5369.1 | 1    | 6    |
| 6042736 |         |         | 6039846 | - | -     | PA5369.2 | 61   | 56   |
| 6043038 |         |         | 6042963 | - | -     | PA5369.3 | 1205 | 1265 |
| 6043143 |         |         | 6043067 | - | -     | PA5369.4 | 1639 | 1884 |
| 6044743 |         |         | 6043208 | - | -     | PA5369.5 | 55   | 52   |
| 6046701 | 6046626 | 6045310 | 6044744 | - | -     | PA5370   | 49   | 47   |
| 6046872 | 6046914 | 6047318 | 6047323 | + | -     | PA5371   | 190  | 166  |
|         | 6049049 | 6047364 | -       | - | betaA | PA5372   | 25   | 16   |
| 6050657 | 6050657 | 6049185 | 6049050 | - | betaB | PA5373   | 67   | 35   |
| 6051469 | 6051311 | 6050718 | 6050700 | - | betI  | PA5374   | 67   | 46   |
|         | 6051644 | 6053194 | +       | + | betI1 | PA5375   | 8    | 5    |

|         |         |         |         |   |      |        |     |     |
|---------|---------|---------|---------|---|------|--------|-----|-----|
| 6054593 | 6054590 | 6053412 | 6053195 | - | -    | PA5376 | 36  | 28  |
| 6055433 | 6055433 | 6054594 | 6054594 | - | -    | PA5377 | 34  | 24  |
|         | 6056413 | 6055475 | -       | - | -    | PA5378 | 47  | 28  |
|         | 6056877 | 6058253 | +       | + | sdab | PA5379 | 4   | 2   |
| 6058355 | 6058673 | 6059776 | 6059778 | + | gbdr | PA5380 | 48  | 51  |
| 6060339 | 6060200 | 6059823 | 6059779 | - | -    | PA5381 | 29  | 33  |
|         | 6061233 | 6060340 | -       | - | -    | PA5382 | 27  | 19  |
|         | 6061341 | 6062408 | +       | + | -    | PA5383 | 1   | 2   |
|         | 6063347 | 6062352 | -       | - | -    | PA5384 | 1   | 0   |
|         | 6063832 | 6063353 | -       | - | cdhB | PA5385 | 1   | 1   |
|         | 6064848 | 6063883 | -       | - | cdhA | PA5386 | 2   | 2   |
|         | 6065783 | 6064899 | -       | - | cdhC | PA5387 | 2   | 2   |
|         | 6066794 | 6065856 | -       | - | -    | PA5388 | 5   | 1   |
|         | 6067005 | 6068015 | +       | + | cdhR | PA5389 | 11  | 7   |
|         | 6069099 | 6067945 | -       | - | -    | PA5390 | 10  | 9   |
|         | 6069830 | 6069156 | -       | - | -    | PA5391 | 4   | 4   |
|         | 6070266 | 6069844 | -       | - | -    | PA5392 | 8   | 6   |
|         | 6071618 | 6070266 | -       | - | -    | PA5393 | 4   | 4   |
| 6073384 | 6073384 | 6071912 | -       | - | cls  | PA5394 | 20  | 15  |
|         | 6073538 | 6074008 | +       | + | -    | PA5395 | 3   | 4   |
|         | 6074230 | 6075207 | +       | + | -    | PA5396 | 27  | 12  |
|         | 6075334 | 6075864 | +       | + | -    | PA5397 | 10  | 4   |
|         | 6075880 | 6077940 | +       | + | dgca | PA5398 | 6   | 4   |
|         | 6078044 | 6080005 | +       | + | dgcB | PA5399 | 5   | 2   |
|         | 6080370 | 6081356 | +       | + | -    | PA5400 | 4   | 1   |
|         | 6081392 | 6082165 | +       | + | -    | PA5401 | 5   | 3   |
|         | 6082290 | 6082859 | 6082859 | + | -    | PA5402 | 68  | 28  |
| 6082860 | 6082867 | 6083073 | 6083079 | + | -    | PA5403 | 102 | 70  |
|         | 6083105 | 6083509 | 6083509 | + | -    | PA5404 | 31  | 10  |
|         | 6083523 | 6083756 | +       | + | -    | PA5405 | 30  | 9   |
|         | 6083753 | 6084085 | +       | + | -    | PA5406 | 134 | 117 |
|         | 6084082 | 6084372 | +       | + | -    | PA5407 | 97  | 71  |

|         |         |         |   |       |        |      |      |
|---------|---------|---------|---|-------|--------|------|------|
| 6084549 | 6084545 | 6084369 | - | -     | PA5408 | 76   | 41   |
|         | 6085110 | 6084550 | - | -     | PA5409 | 46   | 18   |
|         | 6086674 | 6085385 | - | gbca  | PA5410 | 11   | 7    |
|         | 6087099 | 6088199 | + | gbcb  | PA5411 | 21   | 14   |
| 6090819 | 6090706 | 6088193 | - | -     | PA5412 | 64   | 49   |
| 6093100 | 6093086 | 6092046 | - | ltaA  | PA5413 | 196  | 173  |
| 6093808 | 6093808 | 6093167 | - | -     | PA5414 | 144  | 117  |
| 6093984 | 6094024 | 6095277 | + | glyA1 | PA5415 | 12   | 54   |
|         | 6095363 | 6096613 | + | soxB  | PA5416 | 4    | 3    |
|         | 6096707 | 6097027 | + | soxD  | PA5417 | 2    | 2    |
|         | 6097024 | 6100041 | + | soxA  | PA5418 | 4    | 3    |
|         | 6100135 | 6100770 | + | soxG  | PA5419 | 5    | 3    |
|         | 6100820 | 6101677 | + | purU2 | PA5420 | 7    | 4    |
|         | 6101884 | 6103083 | + | fdhA  | PA5421 | 8    | 7    |
| 6103121 | 6103167 | 6104123 | + | -     | PA5422 | 69   | 52   |
| 6104798 | 6104737 | 6104189 | - | -     | PA5423 | 61   | 62   |
| 6105044 | 6105044 | 6104799 | - | -     | PA5424 | 201  | 167  |
| 6106241 | 6106241 | 6105159 | - | purK  | PA5425 | 232  | 225  |
| 6106858 | 6106763 | 6106272 | - | purE  | PA5426 | 379  | 428  |
| 6107028 | 6107111 | 6108139 | + | adhA  | PA5427 | 132  | 130  |
| 6109246 | 6109084 | 6108176 | - | -     | PA5428 | 66   | 60   |
| 6109250 | 6109260 | 6110684 | + | aspa  | PA5429 | 1233 | 1090 |
| 6112273 | 6112262 | 6111048 | - | -     | PA5430 | 61   | 65   |
|         | 6113774 | 6112299 | - | -     | PA5431 | 11   | 7    |
|         | 6113902 | 6114351 | + | -     | PA5432 | 9    | 12   |
| 6114352 | 6114360 | 6115034 | + | -     | PA5433 | 29   | 35   |
| 6116492 | 6116312 | 6115059 | - | mtr   | PA5434 | 40   | 54   |
| 6118325 | 6118316 | 6116493 | - | -     | PA5435 | 161  | 521  |
| 6119822 | 6119747 | 6118332 | - | -     | PA5436 | 222  | 472  |
| 6119927 | 6119961 | 6120896 | + | -     | PA5437 | 61   | 53   |
| 6122055 | 6122053 | 6121172 | - | -     | PA5438 | 213  | 167  |
|         | 6122139 | 6123605 | + | -     | PA5439 | 35   | 33   |

|         |         |         |           |      |              |      |      |
|---------|---------|---------|-----------|------|--------------|------|------|
| 6123674 | 6123686 | 6125080 | 6125088 + | -    | PA5440       | 168  | 286  |
| 6128004 | 6127997 | 6125796 | 6125786 - | -    | PA5441       | 182  | 171  |
| 6130946 | 6130911 | 6128056 | 6128007 - | -    | PA5442       | 14   | 45   |
| 6131088 | 6131088 | 6133274 | 6133311 + | uvrD | PA5443       | 191  | 147  |
| 6133312 | 6133312 | 6133740 | 6133740 + | -    | PA5444       | 62   | 44   |
| 6133741 | 6133838 | 6135331 | 6135491 + | -    | PA5445       | 526  | 27   |
| 6135671 |         |         | 6135682 ? | -    | predicted RN | 451  | 2205 |
| 6135683 | 6135709 | 6135912 | 6135926 + | -    | PA5446       | 1082 | 5457 |
| 6135927 |         |         | 6135942 ? | -    | predicted RN | 531  | 2502 |
|         | 6137113 | 6135968 | 6135943 - | wbpZ | PA5447       | 73   | 196  |
|         | 6138241 | 6137114 | -         | wbpY | PA5448       | 35   | 41   |
|         | 6139607 | 6138225 | -         | wbpX | PA5449       | 26   | 43   |
|         | 6140869 | 6139604 | -         | wzt  | PA5450       | 43   | 63   |
|         | 6141666 | 6140869 | -         | wzm  | PA5451       | 46   | 74   |
| 6143108 | 6143105 | 6141666 | -         | wbpW | PA5452       | 50   | 60   |
|         | 6144080 | 6143109 | 6143109 - | gmd  | PA5453       | 70   | 104  |
| 6145078 | 6144991 | 6144077 | -         | rmd  | PA5454       | 75   | 69   |
| 6145258 | 6145399 | 6147027 | +         | -    | PA5455       | 91   | 113  |
|         | 6147021 | 6148322 | +         | -    | PA5456       | 71   | 95   |
|         | 6148319 | 6149182 | +         | -    | PA5457       | 43   | 60   |
|         | 6149179 | 6150321 | +         | -    | PA5458       | 26   | 37   |
|         | 6150315 | 6151151 | 6151151 + | -    | PA5459       | 40   | 63   |
| 6151152 | 6151314 | 6151526 | 6151585 + | -    | PA5460       | 27   | 20   |
| 6151587 | 6151622 | 6151939 | 6151939 + | -    | PA5461       | 687  | 1100 |
| 6152050 | 6152064 | 6152357 | 6152357 + | -    | PA5462       | 197  | 201  |
| 6152380 | 6152386 | 6152721 | +         | -    | PA5463       | 136  | 120  |
|         | 6152718 | 6154676 | 6154783 + | -    | PA5464       | 63   | 53   |
| 6155270 | 6155203 | 6154784 | 6154784 - | -    | PA5465       | 53   | 36   |
|         | 6155271 | 6156215 | +         | -    | PA5466       | 17   | 7    |
|         | 6156212 | 6156574 | +         | -    | PA5467       | 29   | 15   |
|         | 6156854 | 6158158 | +         | -    | PA5468       | 19   | 7    |
|         | 6158179 | 6158943 | +         | -    | PA5469       | 34   | 21   |

|         |         |         |           |        |          |     |     |
|---------|---------|---------|-----------|--------|----------|-----|-----|
| 6160752 | 6159563 | 6158949 | -         | -      | PA5470   | 54  | 35  |
| 6160955 | 6160699 | 6159560 | -         | -      | PA5471   | 65  | 57  |
| 6161883 | 6160953 | 6160912 | 6160835 - | -      | PA5471.1 | 294 | 258 |
| 6164030 | 6161867 | 6161067 | 6161053 - | -      | PA5472   | 208 | 146 |
| 6166008 | 6162221 | 6163969 | +         | -      | PA5473   | 19  | 11  |
|         | 6164038 | 6165411 | 6165416 + | -      | PA5474   | 79  | 37  |
|         | 6165977 | 6165417 | 6165417 - | -      | PA5475   | 222 | 76  |
|         | 6167409 | 6166120 | -         | citA   | PA5476   | 13  | 7   |
| 6170147 | 6167783 | 6168823 | +         | -      | PA5477   | 41  | 37  |
| 6171510 | 6170071 | 6168842 | 6168841 - | -      | PA5478   | 80  | 77  |
| 6171676 | 6171510 | 6170176 | 6170176 - | gltP   | PA5479   | 443 | 345 |
| 6172690 | 6171733 | 6171927 | 6172222 + | -      | PA5480   | 164 | 123 |
|         | 6172690 | 6172223 | -         | -      | PA5481   | 20  | 5   |
|         | 6172873 | 6172712 | -         | -      | PA5482   | 38  | 10  |
| 6173336 | 6173348 | 6174697 | +         | algB   | PA5483   | 64  | 47  |
| 6177324 | 6174694 | 6176481 | 6176515 + | -      | PA5484   | 61  | 43  |
| 6178035 | 6177295 | 6176516 | 6176516 - | ampDh2 | PA5485   | 52  | 47  |
|         | 6177918 | 6177325 | 6177325 - | -      | PA5486   | 48  | 42  |
| 6180926 | 6180051 | 6178036 | 6178036 - | -      | PA5487   | 88  | 97  |
| 6181671 | 6180926 | 6180048 | -         | -      | PA5488   | 227 | 223 |
| 6182360 | 6181577 | 6180942 | 6180927 - | dsbA   | PA5489   | 712 | 570 |
| 6182770 | 6182350 | 6181745 | 6181696 - | cc4    | PA5490   | 867 | 959 |
| 6182864 | 6182689 | 6182396 | 6182368 - | -      | PA5491   | 336 | 541 |
| 6185655 | 618525  | 6183784 | 6183751 - | polA   | PA5493   | 132 | 96  |
| 6186590 | 6186603 | 6186893 | 6186926 + | -      | PA5494   | 498 | 332 |
| 6186927 | 6186927 | 6187877 | 6187885 + | thrB   | PA5495   | 194 | 150 |
| 6188855 | 6188855 | 6188166 | -         | nrjIb  | PA5496   | 32  | 61  |
| 6191123 | 6191076 | 6188872 | 6188856 - | nrjIa  | PA5497   | 114 | 93  |
| 6192123 | 6192109 | 6191186 | 6191124 - | -      | PA5498   | 46  | 48  |
| 6192179 | 6192179 | 6192682 | +         | np20   | PA5499   | 126 | 89  |
|         | 6192682 | 6193491 | +         | znuC   | PA5500   | 71  | 66  |

|         |         |           |       |        |     |      |
|---------|---------|-----------|-------|--------|-----|------|
| 6193484 | 6194272 | 6194298 + | znuB  | PA5501 | 48  | 48   |
| 6194307 | 6194314 | 6195102   | -     | PA5502 | 65  | 79   |
| 6195290 | 6195309 | 6196316 + | -     | PA5503 | 171 | 187  |
| 6197057 | 6196316 | 6196993 + | -     | PA5504 | 204 | 188  |
| 6198055 | 6197070 | 6197852 + | -     | PA5505 | 479 | 388  |
| 6198917 | 6198055 | 6198912 + | -     | PA5506 | 187 | 6    |
| 6200955 | 6198917 | 6199570 + | -     | PA5507 | 235 | 9    |
| 6201736 | 6199567 | 6200898 + | -     | PA5508 | 130 | 8    |
|         | 6200966 | 6201634 + | -     | PA5509 | 86  | 8    |
|         | 6201736 | 6203085 + | -     | PA5510 | 65  | 10   |
|         | 6204447 | 6203104 - | miR   | PA5511 | 65  | 53   |
|         | 6206210 | 6204444 - | miS   | PA5512 | 23  | 19   |
| 6206286 | 6206292 | 6207170 + | poxA  | PA5513 | 29  | 36   |
|         | 6207241 | 6208029 + | -     | PA5514 | 24  | 16   |
| 6208574 | 6208542 | 6208030 - | -     | PA5515 | 62  | 36   |
| 6208575 | 6208575 | 6209441 + | pdxY  | PA5516 | 80  | 69   |
| 6210063 | 6210063 | 6209442 - | -     | PA5517 | 56  | 58   |
| 6212109 | 6211768 | 6210065 - | -     | PA5518 | 37  | 37   |
| 6212722 | 6212713 | 6212147 - | -     | PA5519 | 72  | 92   |
|         | 6212790 | 6213533 + | -     | PA5520 | 45  | 29   |
| 6214370 | 6214339 | 6213547 - | -     | PA5521 | 96  | 67   |
| 6215801 | 6215801 | 6214434 - | -     | PA5522 | 32  | 24   |
| 6217204 | 6217155 | 6215803 - | -     | PA5523 | 47  | 32   |
| 6217252 | 6217313 | 6218095 + | -     | PA5524 | 44  | 31   |
| 6218096 | 6218100 | 6218840 + | -     | PA5525 | 60  | 60   |
| 6219186 | 6219069 | 6218857 - | -     | PA5526 | 156 | 125  |
| 6219700 | 6219688 | 6219287 - | -     | PA5527 | 183 | 192  |
| 6220749 | 6220739 | 6219885 - | -     | PA5528 | 419 | 324  |
| 6221033 | 6221101 | 6222858 + | -     | PA5529 | 55  | 35   |
| 6223107 | 6223174 | 6224481 + | -     | PA5530 | 41  | 1693 |
| 6225956 | 6225925 | 6224897 - | tonB1 | PA5531 | 101 | 135  |
|         | 6226979 | 6226221 - | -     | PA5532 | 19  | 12   |

|         |         |         |         |   |       |        |      |      |
|---------|---------|---------|---------|---|-------|--------|------|------|
| 6226980 | 6227082 | 6227450 | 6227543 | + | -     | PA5533 | 102  | 83   |
|         | 6228244 | 6227603 | -       | - | -     | PA5534 | 12   | 6    |
|         | 6229443 | 6228241 | -       | - | -     | PA5535 | 11   | 6    |
|         | 6229862 | 6229458 | -       | - | -     | PA5536 | 6    | 1    |
|         | 6229975 | 6230391 | +       | + | -     | PA5537 | 31   | 13   |
|         | 6231562 | 6230369 | -       | - | arniA | PA5538 | 5    | 4    |
|         | 6231662 | 6232558 | +       | + | -     | PA5539 | 1    | 2    |
|         | 6232555 | 6233115 | +       | + | -     | PA5540 | 4    | 4    |
|         | 6233118 | 6234455 | +       | + | pyrQ  | PA5541 | 10   | 7    |
|         | 6235744 | 6234500 | -       | - | -     | PA5542 | 8    | 10   |
|         | 6236229 | 6235831 | -       | - | -     | PA5543 | 11   | 13   |
|         | 6238250 | 6236226 | -       | - | -     | PA5544 | 11   | 12   |
| 6239295 | 6239284 | 6238325 | 6238251 | - | -     | PA5545 | 64   | 56   |
| 6240869 | 6240632 | 6239448 | 6239337 | - | -     | PA5546 | 61   | 49   |
| 6240870 | 6240870 | 6241493 | 6241692 | + | -     | PA5547 | 68   | 38   |
| 6241800 | 6241851 | 6243056 | 6243068 | + | -     | PA5548 | 53   | 51   |
| 6244961 | 6244946 | 6243111 | 6243098 | - | glms  | PA5549 | 161  | 171  |
| 6245802 | 6245735 | 6244962 | 6244962 | - | glmR  | PA5550 | 62   | 93   |
| 6246312 | 6246312 | 6245803 | 6245803 | - | -     | PA5551 | 103  | 108  |
| 6247810 | 6247690 | 6246326 | 6246313 | - | glmJ  | PA5552 | 203  | 199  |
| 6248236 | 6248236 | 6247811 | 6247811 | - | atpC  | PA5553 | 1949 | 1767 |
| 6249654 | 6249654 | 6248278 | 6248237 | - | atpD  | PA5554 | 4546 | 3890 |
| 6250595 | 6250545 | 6249685 | 6249655 | - | atpG  | PA5555 | 4416 | 3955 |
| 6252146 | 6252140 | 6250596 | 6250596 | - | atpA  | PA5556 | 4404 | 3834 |
| 6252695 | 6252695 | 6252159 | 6252154 | - | atpH  | PA5557 | 5392 | 4988 |
| 6253177 | 6253177 | 6252707 | 6252696 | - | atpF  | PA5558 | 5970 | 5366 |
| 6253510 | 6253492 | 6253235 | 6253178 | - | atpE  | PA5559 | 9297 | 8397 |
| 6254411 | 6254411 | 6253542 | 6253512 | - | atpB  | PA5560 | 1268 | 1402 |
| 6254868 | 6254808 | 6254428 | 6254412 | - | atpI  | PA5561 | 250  | 420  |
| 6255844 | 6255844 | 6254972 | 6254874 | - | spoOI | PA5562 | 308  | 245  |
| 6256650 | 6256642 | 6255854 | 6255845 | - | soj   | PA5563 | 282  | 214  |
|         | 6257305 | 6256661 | 6256661 | - | gidB  | PA5564 | 330  | 294  |

|         |         |         |         |      |        |      |      |
|---------|---------|---------|---------|------|--------|------|------|
| 6259211 | 6259197 | 6257305 | -       | gidA | PA5565 | 312  | 284  |
|         | 6260054 | 6259671 | -       | -    | PA5566 | 11   | 5    |
| 6261827 | 6261757 | 6260390 | 6260270 | -    | PA5567 | 70   | 66   |
| 6263804 | 6263564 | 6261828 | 6261828 | -    | PA5568 | 607  | 596  |
| 6264212 | 6264212 | 6263805 | 6263805 | -    | rnppA  | 2727 | 2797 |
| 6264400 | 6264361 | 6264227 | 6264213 | -    | rpmH   | 6241 | 5834 |





































































|        |        |       |         |    |       |      |       |       |      |      |      |      |       |       |      |      |      |      |       |       |      |      |      |      |      |       |      |
|--------|--------|-------|---------|----|-------|------|-------|-------|------|------|------|------|-------|-------|------|------|------|------|-------|-------|------|------|------|------|------|-------|------|
| PA5019 | 33061  | 5.72  | 287.07  | 7  | 23.26 | 0.83 | -0.26 | -1.01 | 0.31 | 769  | 0.88 | 0.75 | -0.41 | -1.61 | 0.11 | 450  | 0.52 | 0.87 | -0.20 | -0.72 | 0.47 | 1041 | 0.93 | 0.82 | 3.00 | -0.29 | 0.06 |
| PA5022 | 131087 | 5.96  | 981.31  | 24 | 16.96 | 1.19 | 0.25  | 0.80  | 0.43 | 983  | 0.94 | 1.28 | 0.36  | 1.23  | 0.22 | 619  | 0.77 | 1.13 | 0.17  | 0.53  | 0.59 | 1239 | 0.99 | 1.20 | 3.00 | 0.26  | 0.08 |
| PA5025 | 46964  | 6.04  | 255.48  | 6  | 17.97 | 0.92 | -0.12 | -0.48 | 0.63 | 1384 | 0.99 | 0.77 | -0.38 | -1.52 | 0.13 | 491  | 0.56 | 0.87 | -0.20 | -0.73 | 0.47 | 1031 | 0.93 | 0.85 | 3.00 | -0.23 | 0.08 |
| PA5027 | 30777  | 6.30  | 288.38  | 7  | 25.83 | 0.84 | -0.25 | -0.96 | 0.34 | 813  | 0.90 | 0.79 | -0.35 | -1.39 | 0.17 | 535  | 0.67 | 0.98 | -0.03 | -0.15 | 0.88 | 1808 | 1.00 | 0.87 | 3.00 | -0.20 | 0.10 |
| PA5034 | 40779  | 5.93  | 286.14  | 9  | 23.63 | 1.03 | 0.05  | 0.09  | 0.93 | 2014 | 1.00 | 1.05 | 0.07  | 0.18  | 0.86 | 1889 | 0.98 | 1.06 | 0.08  | 0.22  | 0.83 | 1692 | 1.01 | 1.05 | 3.00 | 0.07  | 0.01 |
| PA5036 | 171891 | 5.76  | 95.50   | 4  | 5.70  | 0.64 | -0.64 | -2.31 | 0.02 | 230  | 0.20 | 0.85 | -0.23 | -0.97 | 0.33 | 812  | 0.88 | 0.57 | -0.81 | -2.82 | 0.00 | 189  | 0.05 | 0.69 | 3.00 | -0.54 | 0.15 |
| PA5037 | 60726  | 6.62  | 800.94  | 17 | 24.15 | 0.98 | -0.16 | -0.65 | 0.51 | 1136 | 0.98 | 1.00 | -0.01 | -0.12 | 0.91 | 1991 | 0.98 | 0.93 | -0.01 | -0.11 | 0.91 | 1879 | 1.00 | 0.96 | 3.00 | -0.06 | 0.06 |
| PA5038 | 41951  | 5.52  | 816.38  | 17 | 46.12 | 0.95 | -0.07 | -0.34 | 0.73 | 1613 | 0.99 | 1.06 | 0.08  | 0.21  | 0.84 | 1846 | 0.98 | 0.99 | -0.11 | -1.69 | 0.09 | 378  | 1.00 | 0.98 | 3.00 | -0.03 | 0.07 |
| PA5040 | 83764  | 5.48  | 2266.30 | 55 | 54.14 | 0.73 | -0.46 | -1.69 | 0.09 | 384  | 0.52 | 0.74 | -0.44 | -1.73 | 0.08 | 408  | 0.44 | 0.72 | -0.48 | -1.69 | 0.09 | 378  | 0.50 | 0.73 | 3.00 | -0.46 | 0.01 |
| PA5041 | 20817  | 9.04  | 148.41  | 5  | 19.46 | 1.63 | 0.70  | 2.38  | 0.02 | 220  | 0.17 | 0.65 | -0.63 | -2.45 | 0.01 | 242  | 0.13 | 0.65 | -0.61 | -2.13 | 0.03 | 281  | 0.24 | 0.98 | 3.00 | -0.04 | 0.56 |
| PA5042 | 24868  | 5.04  | 468.61  | 9  | 37.59 | 0.56 | -0.84 | -3.04 | 0.00 | 152  | 0.03 | 0.50 | -1.01 | -3.86 | 0.00 | 125  | 0.00 | 0.48 | -1.06 | -3.65 | 0.00 | 127  | 0.00 | 0.51 | 3.00 | -0.97 | 0.04 |
| PA5043 | 24073  | 9.43  | 508.49  | 7  | 40.40 | 0.54 | -0.89 | -3.22 | 0.00 | 131  | 0.02 | 0.46 | -1.11 | -4.25 | 0.00 | 109  | 0.00 | 0.47 | -1.09 | -3.75 | 0.00 | 122  | 0.00 | 0.49 | 3.00 | -1.03 | 0.04 |
| PA5044 | 40758  | 4.83  | 761.72  | 17 | 39.48 | 0.56 | -0.83 | -2.98 | 0.00 | 156  | 0.04 | 0.55 | -0.86 | -3.31 | 0.00 | 153  | 0.01 | 0.52 | -0.95 | -3.28 | 0.00 | 147  | 0.01 | 0.54 | 3.00 | -0.88 | 0.02 |
| PA5045 | 96278  | 5.87  | 557.46  | 18 | 22.15 | 0.96 | -0.06 | -0.28 | 0.78 | 1713 | 0.99 | 1.00 | 0.00  | -0.08 | 0.93 | 2038 | 0.99 | 1.02 | 0.03  | 0.06  | 0.95 | 1962 | 1.00 | 1.00 | 3.00 | -0.01 | 0.03 |
| PA5046 | 49710  | 5.05  | 2074.16 | 49 | 63.63 | 1.28 | 0.35  | 1.15  | 0.25 | 659  | 0.82 | 1.38 | 0.46  | 1.62  | 0.10 | 447  | 0.51 | 1.36 | 0.44  | 1.43  | 0.15 | 503  | 0.62 | 1.34 | 3.00 | 0.42  | 0.05 |
| PA5047 | 54414  | 8.45  | 101.11  | 4  | 8.93  | 1.04 | 0.05  | 0.09  | 0.92 | 2008 | 1.00 | 1.14 | 0.19  | 0.63  | 0.53 | 1195 | 0.96 | 1.00 | 0.00  | -0.07 | 0.94 | 1946 | 1.00 | 1.06 | 3.00 | 0.08  | 0.08 |
| PA5049 | 9298   | 8.93  | 71.17   | 2  | 21.10 | 1.00 | 0.00  | -0.09 | 0.92 | 2006 | 1.00 | 1.12 | 0.16  | 0.50  | 0.62 | 1390 | 0.96 | 0.99 | -0.02 | -0.11 | 0.91 | 1874 | 1.00 | 1.03 | 3.00 | 0.05  | 0.07 |
| PA5050 | 85261  | 9.02  | 74.95   | 2  | 2.75  | 1.86 | 0.89  | 3.06  | 0.00 | 149  | 0.03 | 1.02 | 0.02  | -0.01 | 1.00 | 2153 | 1.00 | 1.20 | 0.26  | 0.82  | 0.41 | 922  | 0.93 | 1.36 | 3.00 | 0.44  | 0.44 |
| PA5051 | 69181  | 5.35  | 1058.61 | 25 | 42.04 | 0.92 | -0.12 | -0.48 | 0.63 | 1385 | 0.98 | 0.98 | -0.03 | -0.22 | 0.82 | 1819 | 0.98 | 0.94 | -0.08 | -0.34 | 0.73 | 1509 | 1.00 | 0.95 | 3.00 | -0.08 | 0.03 |
| PA5052 | 27658  | 10.19 | 207.14  | 7  | 28.61 | 1.38 | 0.47  | 1.56  | 0.12 | 435  | 0.59 | 1.13 | 0.18  | 0.56  | 0.58 | 1293 | 0.96 | 0.94 | -0.09 | -0.35 | 0.73 | 1496 | 1.00 | 1.15 | 3.00 | 0.20  | 0.22 |
| PA5053 | 19955  | 6.23  | 194.14  | 4  | 26.58 | 0.74 | -0.44 | -1.61 | 0.11 | 415  | 0.56 | 0.94 | -0.09 | -0.45 | 0.65 | 1459 | 0.97 | 0.66 | -0.60 | -2.09 | 0.04 | 289  | 0.26 | 0.78 | 3.00 | -0.36 | 0.14 |
| PA5054 | 54276  | 5.49  | 1189.15 | 28 | 48.45 | 0.85 | -0.24 | -0.93 | 0.35 | 843  | 0.91 | 0.91 | -0.13 | -0.38 | 0.56 | 1258 | 0.97 | 0.91 | -0.14 | -0.53 | 0.60 | 1244 | 0.99 | 0.89 | 3.00 | -0.17 | 0.04 |
| PA5055 | 14798  | 5.23  | 103.78  | 3  | 32.50 | 1.17 | 0.23  | 0.73  | 0.47 | 1044 | 0.97 | 1.16 | 0.21  | 0.70  | 0.48 | 1092 | 0.96 | 1.02 | 0.02  | 0.02  | 0.98 | 2028 | 1.00 | 1.12 | 3.00 | 0.16  | 0.09 |
| PA5060 | 38773  | 10.31 | 309.91  | 9  | 21.97 | 0.73 | -0.46 | -1.70 | 0.09 | 379  | 0.51 | 0.72 | -0.46 | -1.83 | 0.07 | 381  | 0.38 | 0.74 | -0.44 | -1.54 | 0.12 | 445  | 0.57 | 0.73 | 3.00 | -0.45 | 0.01 |
| PA5063 | 30876  | 9.06  | 850.98  | 20 | 58.44 | 0.88 | -0.18 | -0.72 | 0.47 | 1065 | 0.97 | 0.84 | -0.25 | -1.03 | 0.30 | 766  | 0.85 | 0.87 | -0.21 | -0.76 | 0.45 | 985  | 0.94 | 0.86 | 3.00 | -0.21 | 0.02 |
| PA5064 | 23710  | 5.69  | 195.71  | 5  | 27.14 | 1.00 | 0.00  | -0.10 | 0.92 | 2001 | 1.00 | 1.02 | 0.02  | -0.01 | 0.99 | 2149 | 1.00 | 0.86 | -0.23 | -0.82 | 0.41 | 917  | 0.92 | 0.96 | 3.00 | -0.06 | 0.09 |
| PA5065 | 64703  | 9.12  | 353.42  | 10 | 19.56 | 0.98 | -0.03 | -0.19 | 0.85 | 1874 | 0.99 | 1.03 | 0.04  | 0.05  | 0.96 | 2089 | 0.99 | 1.00 | -0.01 | -0.08 | 0.94 | 1937 | 1.00 | 1.00 | 3.00 | 0.00  | 0.02 |
| PA5067 | 13086  | 5.09  | 92.36   | 3  | 20.40 | 0.92 | -0.12 | -0.49 | 0.62 | 1378 | 0.98 | 1.14 | 0.18  | 0.59  | 0.56 | 1237 | 0.97 | 1.05 | 0.07  | 0.20  | 0.85 | 1742 | 1.00 | 1.04 | 3.00 | 0.05  | 0.11 |
| PA5071 | 27680  | 8.77  | 58.36   | 2  | 4.70  | 0.98 | -0.04 | -0.21 | 0.84 | 1831 | 0.99 | 0.94 | -0.08 | -0.41 | 0.68 | 1517 | 0.97 | 1.23 | 0.30  | 0.97  | 0.33 | 783  | 0.87 | 1.05 | 3.00 | 0.07  | 0.16 |
| PA5072 | 71002  | 5.07  | 598.27  | 13 | 29.78 | 1.11 | 0.15  | 0.43  | 0.67 | 1468 | 0.99 | 0.89 | -0.17 | -0.74 | 0.46 | 1043 | 0.96 | 0.85 | -0.23 | -0.83 | 0.41 | 911  | 0.92 | 0.95 | 3.00 | -0.08 | 0.14 |
| PA5075 | 36703  | 7.93  | 157.04  | 5  | 15.64 | 0.85 | -0.23 | -0.87 | 0.38 | 894  | 0.93 | 1.11 | 0.15  | 0.46  | 0.65 | 1451 | 0.97 | 0.93 | -0.11 | -0.43 | 0.67 | 1372 | 1.00 | 0.96 | 3.00 | -0.05 | 0.13 |
| PA5076 | 33366  | 6.85  | 814.47  | 16 | 47.23 | 0.91 | -0.13 | -0.54 | 0.59 | 1298 | 0.99 | 1.06 | 0.09  | 0.24  | 0.81 | 1796 | 0.98 | 0.92 | -0.11 | -0.44 | 0.66 | 1352 | 1.00 | 0.97 | 3.00 | -0.05 | 0.08 |
| PA5077 | 101192 | 8.91  | 504.99  | 12 | 16.80 | 1.00 | 0.00  | -0.07 | 0.95 | 2062 | 1.00 | 0.95 | -0.08 | -0.39 | 0.70 | 1555 | 0.97 | 0.96 | -0.06 | -0.27 | 0.79 | 1621 | 1.00 | 0.97 | 3.00 | -0.04 | 0.03 |
| PA5078 | 64883  | 6.54  | 1175.44 | 28 | 50.98 | 0.90 | -0.15 | -0.61 | 0.54 | 1199 | 0.99 | 0.89 | -0.17 | -0.73 | 0.47 | 1052 | 0.96 | 0.86 | -0.22 | -0.79 | 0.43 | 947  | 0.94 | 0.88 | 3.00 | -0.18 | 0.02 |
| PA5080 | 37541  | 5.80  | 276.53  | 9  | 30.30 | 0.97 | -0.05 | -0.24 | 0.81 | 1780 | 0.99 | 1.12 | 0.17  | 0.52  | 0.60 | 1348 | 0.97 | 0.92 | -0.12 | -0.45 | 0.65 | 1345 | 1.00 | 1.00 | 3.00 | 0.01  | 0.10 |
| PA5105 | 28621  | 6.87  | 208.14  | 6  | 24.27 | 0.93 | -0.10 | -0.43 | 0.67 | 1473 | 0.99 | 1.11 | 0.14  | 0.44  | 0.66 | 1476 | 0.97 | 0.91 | -0.14 | -0.53 | 0.59 | 1238 | 0.99 | 0.98 | 3.00 | -0.03 | 0.11 |
| PA5110 | 39302  | 5.71  | 742.51  | 17 | 36.85 | 1.02 | 0.02  | 0.00  | 1.00 | 2171 | 1.00 | 1.00 | 0.00  | -0.08 | 0.93 | 2035 | 0.99 | 0.96 | -0.07 | -0.28 | 0.78 | 1605 | 1.00 | 0.99 | 3.00 | -0.01 | 0.03 |
| PA5112 | 71866  | 4.68  | 493.09  | 10 | 17.89 | 1.64 | 0.72  | 2.43  | 0.02 | 216  | 0.15 | 1.72 | 0.78  | 2.81  | 0.00 | 199  | 0.05 | 1.79 | 0.84  | 2.80  | 0.01 | 191  | 0.05 | 1.72 | 3.00 | 0.08  | 0.08 |
| PA5117 | 72141  | 5.22  | 1733.56 | 37 | 36.77 | 1.03 | 0.04  | 0.07  | 0.95 | 2059 | 1.00 | 0.98 | -0.02 | -0.18 | 0.85 | 1884 | 0.98 | 1.00 | 0.00  | -0.06 | 0.95 | 1966 | 1.00 | 1.00 | 3.00 | 0.01  | 0.02 |
| PA5118 | 58261  | 6.22  | 348.68  | 7  | 16.41 | 1.08 | 0.11  | 0.29  | 0.77 | 1690 | 0.99 | 1.07 | 0.10  | 0.27  | 0.78 | 1734 | 0.98 | 0.91 | -0.13 | -0.51 | 0.61 | 1260 | 0.99 | 1.02 | 3.00 | 0.03  | 0.09 |
| PA5119 | 56995  | 5.14  | 1679.86 | 39 | 57.90 | 1.10 | 0.14  | 0.39  | 0.69 | 1527 | 0.99 | 1.12 | 0.16  | 0.51  | 0.61 | 1367 | 0.96 | 1.09 | 0.12  | 0.36  | 0.72 | 1475 | 1.00 | 1.10 | 3.00 | 0.14  | 0.02 |
| PA5125 | 54929  | 5.59  | 260.96  | 7  | 16.53 | 0.80 | -0.33 | -1.37 | 0.22 | 608  | 0.77 | 0.89 | -0.17 | -0.71 | 0.47 | 1071 | 0.96 | 1.01 | 0.01  | -0.03 | 0.97 | 1399 | 1.00 | 0.90 | 3.00 | -0.16 | 0.10 |
| PA5128 | 18902  | 4.46  | 933.54  | 18 | 78.97 | 0.95 | -0.08 | -0.37 | 0.71 | 1583 | 0.98 | 0.97 | -0.05 | -0.24 | 0.78 | 1722 | 0.98 | 0.93 | -0.10 | -0.41 | 0.68 | 1399 | 1.00 | 0.95 | 3.00 | -0.08 | 0.02 |
| PA5130 | 16779  | 9.65  | 459.05  | 12 | 60.73 | 0.94 | -0.09 | -0.39 | 0.70 | 1540 | 0.98 | 0.97 | -0.04 | -0.28 | 0.81 | 1797 | 0.98 | 1.04 | 0.05  | 0.12  | 0.91 | 1862 | 1.00 | 0.98 | 3.00 | -0.02 | 0.05 |
| PA5131 | 58632  | 5.07  | 1183.46 | 25 | 47.18 | 0.88 | -0.19 | -0.76 | 0.45 | 1017 | 0.96 | 0.86 | -0.22 | -0.90 | 0.37 | 861  | 0.92 | 0.89 | -0.16 | -0.61 | 0.54 | 1161 | 0.96 | 0.88 | 3.00 | -0.19 | 0.02 |
| PA5133 | 51390  | 9.40  | 77.35   | 2  | 5.60  | 0.93 | -0.10 | -0.44 | 0.66 | 1456 | 0.99 | 1.18 | 0.23  | 0.77  | 0.44 | 1010 | 0.94 | 1.19 | 0.25  | 0.78  | 0.43 | 958  | 0.93 | 1.10 | 3.00 | 0.14  | 0.14 |



|        |        |       |         |    |       |      |       |       |      |      |      |      |       |       |      |      |      |      |       |       |      |      |      |      |      |       |      |
|--------|--------|-------|---------|----|-------|------|-------|-------|------|------|------|------|-------|-------|------|------|------|------|-------|-------|------|------|------|------|------|-------|------|
| PA5225 | 20060  | 4.30  | 202.24  | 4  | 27.58 | 0.92 | -0.12 | -0.50 | 0.62 | 1361 | 0.98 | 0.95 | -0.08 | -0.39 | 0.70 | 1556 | 0.97 | 1.08 | 0.11  | 0.33  | 0.74 | 1536 | 1.00 | 0.98 | 3.00 | -0.02 | 0.09 |
| PA5227 | 12460  | 5.37  | 116.48  | 3  | 31.70 | 0.90 | -0.15 | -0.62 | 0.54 | 1174 | 0.99 | 1.37 | 0.46  | 1.60  | 0.11 | 454  | 0.52 | 0.81 | -0.30 | -1.06 | 0.29 | 701  | 0.85 | 1.03 | 3.00 | 0.04  | 0.30 |
| PA5229 | 17915  | 6.73  | 313.71  | 7  | 29.70 | 0.79 | -0.33 | -1.24 | 0.21 | 603  | 0.77 | 0.91 | -0.13 | -0.59 | 0.56 | 1231 | 0.97 | 0.92 | -0.13 | -0.48 | 0.63 | 1299 | 1.00 | 0.87 | 3.00 | -0.19 | 0.07 |
| PA5231 | 103632 | 6.18  | 154.31  | 5  | 6.08  | 1.00 | 0.00  | -0.08 | 0.94 | 2034 | 1.00 | 0.90 | -0.15 | -0.65 | 0.52 | 1166 | 0.96 | 1.16 | 0.22  | 0.68  | 0.49 | 1079 | 0.94 | 1.02 | 3.00 | 0.03  | 0.13 |
| PA5232 | 41468  | 9.11  | 877.90  | 19 | 46.35 | 0.83 | -0.27 | -1.02 | 0.31 | 758  | 0.88 | 0.82 | -0.29 | -1.16 | 0.24 | 647  | 0.82 | 0.84 | -0.25 | -0.90 | 0.37 | 830  | 0.91 | 0.83 | 3.00 | -0.27 | 0.01 |
| PA5234 | 36485  | 6.46  | 137.71  | 3  | 15.70 | 0.90 | -0.16 | -0.63 | 0.53 | 1161 | 0.99 | 0.85 | -0.23 | -0.97 | 0.33 | 811  | 0.88 | 0.90 | -0.16 | -0.58 | 0.56 | 1196 | 0.96 | 0.88 | 3.00 | -0.18 | 0.03 |
| PA5235 | 15901  | 8.95  | 112.04  | 2  | 5.60  | 0.92 | -0.13 | -0.53 | 0.60 | 1313 | 0.99 | 0.71 | -0.49 | -1.93 | 0.05 | 350  | 0.33 | 0.74 | -0.43 | -1.51 | 0.13 | 456  | 0.59 | 0.79 | 3.00 | -0.34 | 0.11 |
| PA5236 | 36562  | 5.55  | 138.79  | 3  | 14.07 | 0.87 | -0.20 | -0.78 | 0.43 | 996  | 0.95 | 0.98 | -0.03 | -0.20 | 0.84 | 1850 | 0.98 | 0.96 | -0.06 | -0.25 | 0.80 | 1651 | 1.00 | 0.94 | 3.00 | -0.09 | 0.06 |
| PA5237 | 58753  | 6.15  | 353.84  | 10 | 15.90 | 1.04 | 0.05  | -0.10 | 0.92 | 2003 | 1.00 | 0.81 | -0.31 | -1.24 | 0.21 | 612  | 0.76 | 0.94 | -0.10 | -0.38 | 0.70 | 1445 | 1.00 | 0.93 | 3.00 | -0.11 | 0.11 |
| PA5239 | 51887  | 6.40  | 2195.43 | 46 | 72.80 | 0.91 | -0.13 | -0.54 | 0.59 | 1290 | 0.99 | 0.86 | -0.22 | -0.93 | 0.35 | 844  | 0.91 | 0.86 | -0.21 | -0.78 | 0.44 | 961  | 0.93 | 0.88 | 3.00 | -0.19 | 0.03 |
| PA5240 | 13441  | 4.70  | 765.46  | 14 | 62.00 | 0.83 | -0.27 | -1.03 | 0.30 | 751  | 0.88 | 0.86 | -0.21 | -0.88 | 0.38 | 879  | 0.93 | 0.92 | -0.12 | -0.46 | 0.64 | 1326 | 1.00 | 0.87 | 3.00 | -0.20 | 0.05 |
| PA5241 | 59306  | 6.25  | 526.78  | 16 | 30.13 | 0.87 | -0.21 | -0.81 | 0.42 | 973  | 0.94 | 0.92 | -0.12 | -0.55 | 0.58 | 1300 | 0.96 | 0.85 | -0.23 | -0.84 | 0.40 | 890  | 0.92 | 0.88 | 3.00 | -0.19 | 0.04 |
| PA5242 | 88563  | 7.32  | 1405.09 | 32 | 36.16 | 1.14 | 0.19  | 0.59  | 0.56 | 1233 | 0.98 | 1.17 | 0.23  | 0.74  | 0.46 | 1038 | 0.95 | 1.23 | 0.30  | 0.96  | 0.34 | 788  | 0.88 | 1.18 | 3.00 | 0.24  | 0.05 |
| PA5243 | 38423  | 5.06  | 634.61  | 12 | 36.50 | 0.79 | -0.35 | -1.30 | 0.19 | 568  | 0.75 | 0.94 | -0.08 | -0.41 | 0.69 | 1530 | 0.97 | 0.99 | -0.01 | -0.09 | 0.93 | 1916 | 1.00 | 0.91 | 3.00 | -0.14 | 0.11 |
| PA5245 | 25370  | 4.95  | 847.81  | 18 | 70.95 | 0.90 | -0.16 | -0.63 | 0.53 | 1160 | 0.99 | 1.06 | 0.08  | -0.21 | 0.83 | 1836 | 0.98 | 1.04 | 0.05  | 0.12  | 0.91 | 1861 | 1.00 | 1.00 | 3.00 | 0.00  | 0.09 |
| PA5252 | 75099  | 5.70  | 939.54  | 25 | 34.11 | 0.98 | -0.02 | -0.16 | 0.87 | 1923 | 0.98 | 1.00 | -0.01 | -0.12 | 0.91 | 1990 | 0.98 | 0.98 | -0.04 | -0.18 | 0.86 | 1773 | 1.00 | 0.99 | 3.00 | -0.02 | 0.01 |
| PA5253 | 44026  | 10.60 | 323.52  | 7  | 10.63 | 0.69 | -0.53 | -1.93 | 0.05 | 294  | 0.40 | 0.82 | -0.29 | -1.19 | 0.23 | 639  | 0.79 | 0.83 | -0.26 | -0.95 | 0.34 | 802  | 0.88 | 0.78 | 3.00 | -0.36 | 0.08 |
| PA5255 | 18852  | 4.83  | 69.37   | 2  | 15.00 | 0.98 | -0.02 | -0.17 | 0.87 | 1912 | 0.99 | 0.76 | -0.39 | -1.54 | 0.12 | 484  | 0.55 | 1.00 | 0.00  | -0.05 | 0.96 | 1983 | 1.00 | 0.92 | 3.00 | -0.13 | 0.13 |
| PA5257 | 48050  | 8.94  | 1005.17 | 23 | 54.09 | 1.01 | 0.01  | -0.05 | 0.96 | 2100 | 1.00 | 1.01 | 0.02  | -0.04 | 0.97 | 2107 | 0.99 | 0.99 | -0.01 | -0.08 | 0.94 | 1935 | 1.00 | 1.00 | 3.00 | 0.01  | 0.01 |
| PA5258 | 42320  | 4.99  | 816.19  | 17 | 47.04 | 1.02 | 0.02  | 0.00  | 1.00 | 2172 | 1.00 | 0.99 | -0.01 | -0.14 | 0.89 | 1961 | 0.98 | 0.89 | -0.17 | -0.62 | 0.54 | 1154 | 0.96 | 0.97 | 3.00 | -0.05 | 0.07 |
| PA5260 | 35101  | 5.39  | 522.06  | 14 | 39.73 | 1.14 | -0.34 | 0.59  | 0.56 | 1227 | 0.98 | 1.01 | 0.02  | -0.02 | 0.98 | 2132 | 1.00 | 0.96 | -0.06 | -0.26 | 0.79 | 1630 | 1.00 | 1.04 | 3.00 | 0.05  | 0.09 |
| PA5261 | 29124  | 6.73  | 212.09  | 6  | 26.40 | 0.79 | -0.12 | -1.27 | 0.20 | 581  | 0.76 | 0.75 | -0.41 | -1.61 | 0.11 | 449  | 0.52 | 0.84 | -0.25 | -0.90 | 0.37 | 838  | 0.91 | 0.80 | 3.00 | -0.33 | 0.04 |
| PA5263 | 54288  | 5.50  | 731.85  | 20 | 31.77 | 0.92 | -0.12 | -0.50 | 0.62 | 1363 | 0.99 | 0.94 | -0.09 | -0.42 | 0.67 | 1507 | 0.97 | 0.88 | -0.18 | -0.66 | 0.51 | 1100 | 0.95 | 0.92 | 3.00 | -0.13 | 0.03 |
| PA5274 | 15163  | 4.46  | 553.12  | 8  | 69.40 | 0.94 | -0.09 | -0.40 | 0.69 | 1517 | 0.98 | 0.87 | -0.21 | -0.86 | 0.39 | 902  | 0.93 | 1.05 | 0.07  | 0.18  | 0.86 | 1762 | 1.00 | 0.95 | 3.00 | -0.07 | 0.09 |
| PA5275 | 12542  | 4.19  | 203.10  | 4  | 53.18 | 1.03 | 0.04  | 0.06  | 0.95 | 2075 | 1.00 | 1.10 | 0.14  | 0.43  | 0.67 | 1994 | 0.97 | 1.25 | 0.32  | 1.02  | 0.31 | 740  | 0.85 | 1.13 | 3.00 | 0.17  | 0.11 |
| PA5277 | 47332  | 5.41  | 1160.79 | 24 | 52.04 | 1.02 | 0.02  | 0.00  | 1.00 | 2173 | 1.00 | 1.05 | 0.07  | 0.17  | 0.87 | 1916 | 0.98 | 1.00 | 0.00  | -0.05 | 0.96 | 1981 | 1.00 | 1.02 | 3.00 | 0.03  | 0.02 |
| PA5278 | 31926  | 7.16  | 255.97  | 7  | 21.44 | 1.09 | -0.12 | 0.36  | 0.72 | 1593 | 0.99 | 1.11 | 0.15  | 0.45  | 0.66 | 1466 | 0.97 | 1.00 | -0.01 | -0.08 | 0.94 | 1931 | 1.00 | 1.06 | 3.00 | 0.09  | 0.06 |
| PA5279 | 26518  | 5.36  | 179.35  | 4  | 15.98 | 0.91 | -0.14 | -0.58 | 0.56 | 1244 | 0.98 | 0.91 | -0.14 | -0.60 | 0.55 | 1218 | 0.97 | 0.93 | -0.10 | -0.41 | 0.68 | 1396 | 1.00 | 0.92 | 3.00 | -0.13 | 0.01 |
| PA5288 | 13864  | 5.41  | 582.03  | 13 | 75.42 | 0.61 | -0.71 | -2.56 | 0.01 | 193  | 0.12 | 0.67 | -0.57 | -2.24 | 0.03 | 280  | 0.20 | 0.61 | -0.71 | -2.48 | 0.01 | 228  | 0.12 | 0.63 | 3.00 | -0.66 | 0.03 |
| PA5289 | 10392  | 5.17  | 223.10  | 7  | 69.97 | 0.90 | -0.15 | -0.61 | 0.54 | 1200 | 0.98 | 0.92 | -0.12 | -0.55 | 0.58 | 1308 | 0.96 | 0.89 | -0.16 | -0.60 | 0.55 | 1171 | 0.96 | 0.90 | 3.00 | -0.14 | 0.01 |
| PA5291 | 75131  | 6.25  | 137.83  | 5  | 3.90  | 0.69 | -0.53 | -1.94 | 0.05 | 293  | 0.39 | 0.66 | -0.61 | -2.36 | 0.02 | 257  | 0.15 | 0.57 | -0.82 | -2.82 | 0.00 | 186  | 0.05 | 0.64 | 3.00 | -0.65 | 0.06 |
| PA5296 | 82745  | 5.78  | 405.25  | 10 | 13.60 | 1.03 | 0.05  | 0.08  | 0.94 | 2039 | 1.00 | 1.20 | 0.26  | 0.87  | 0.38 | 891  | 0.93 | 1.03 | 0.05  | 0.10  | 0.92 | 1885 | 1.00 | 1.09 | 3.00 | 0.12  | 0.10 |
| PA5298 | 22435  | 6.17  | 596.09  | 11 | 58.96 | 1.15 | 0.20  | 0.61  | 0.54 | 1189 | 0.99 | 1.24 | 0.31  | 1.06  | 0.29 | 747  | 0.84 | 1.16 | 0.21  | 0.65  | 0.52 | 1115 | 0.95 | 1.18 | 3.00 | 0.24  | 0.05 |
| PA5300 | 15599  | 6.70  | 473.03  | 10 | 41.20 | 1.01 | 0.02  | -0.02 | 0.98 | 2141 | 1.00 | 1.03 | 0.04  | 0.06  | 0.95 | 2069 | 0.99 | 1.23 | 0.29  | 0.94  | 0.35 | 807  | 0.89 | 1.09 | 3.00 | 0.12  | 0.12 |
| PA5301 | 21373  | 5.42  | 220.68  | 6  | 31.80 | 0.97 | -0.05 | -0.26 | 0.80 | 1751 | 0.99 | 1.02 | 0.02  | -0.01 | 0.99 | 2151 | 1.00 | 1.09 | 0.13  | 0.37  | 0.71 | 1468 | 1.00 | 1.02 | 3.00 | 0.03  | 0.06 |
| PA5302 | 40463  | 6.38  | 529.82  | 15 | 38.63 | 2.66 | 1.41  | 4.87  | 0.00 | 72   | 0.00 | 2.46 | 1.30  | 4.75  | 0.00 | 91   | 0.00 | 2.85 | 1.51  | 5.06  | 0.00 | 83   | 0.00 | 2.66 | 3.00 | 1.41  | 0.19 |
| PA5304 | 49744  | 6.97  | 1371.81 | 36 | 66.13 | 2.35 | 1.23  | 4.25  | 0.00 | 89   | 0.00 | 2.54 | 1.35  | 4.92  | 0.00 | 85   | 0.00 | 2.59 | 1.37  | 4.59  | 0.00 | 94   | 0.00 | 2.49 | 3.00 | 1.32  | 0.12 |
| PA5305 | 12817  | 9.57  | 153.55  | 4  | 55.30 | 0.80 | -0.33 | -1.23 | 0.22 | 613  | 0.78 | 0.90 | -0.15 | -0.66 | 0.51 | 1137 | 0.96 | 1.02 | 0.03  | 0.03  | 0.98 | 2019 | 1.00 | 0.90 | 3.00 | -0.14 | 0.11 |
| PA5308 | 20533  | 7.83  | 80.72   | 3  | 10.07 | 0.92 | -0.11 | -0.43 | 0.67 | 1469 | 0.99 | 1.11 | -0.16 | -0.68 | 0.49 | 1118 | 0.96 | 0.77 | -0.38 | -1.34 | 0.18 | 543  | 0.68 | 0.86 | 3.00 | -0.21 | 0.08 |
| PA5312 | 58050  | 5.40  | 2071.16 | 38 | 59.62 | 1.16 | 0.22  | 0.69  | 0.49 | 1096 | 0.97 | 1.19 | 0.25  | 0.84  | 0.40 | 930  | 0.93 | 1.10 | 0.14  | 0.42  | 0.68 | 1390 | 1.00 | 1.15 | 3.00 | 0.20  | 0.05 |
| PA5313 | 50276  | 6.21  | 625.61  | 15 | 37.75 | 0.88 | -0.18 | -0.71 | 0.48 | 1070 | 0.97 | 0.82 | -0.29 | -1.16 | 0.24 | 648  | 0.81 | 0.77 | -0.37 | -1.31 | 0.19 | 554  | 0.71 | 0.83 | 3.00 | -0.28 | 0.05 |
| PA5315 | 7482   | 9.99  | 130.01  | 2  | 29.40 | 0.48 | -1.05 | -3.77 | 0.00 | 104  | 0.00 | 0.98 | -0.03 | -0.21 | 0.83 | 1842 | 0.98 | 0.95 | -0.07 | -0.30 | 0.76 | 1577 | 1.00 | 0.80 | 3.00 | -0.31 | 0.28 |
| PA5316 | 10115  | 11.72 | 217.48  | 6  | 64.53 | 0.86 | -0.22 | -0.87 | 0.38 | 905  | 0.92 | 0.94 | -0.08 | -0.41 | 0.69 | 1533 | 0.97 | 0.95 | -0.08 | -0.31 | 0.75 | 1558 | 1.00 | 0.92 | 3.00 | -0.13 | 0.05 |
| PA5317 | 61631  | 6.47  | 261.75  | 7  | 11.97 | 0.80 | -0.32 | -1.22 | 0.22 | 620  | 0.79 | 0.76 | -0.39 | -1.54 | 0.12 | 482  | 0.55 | 0.86 | -0.22 | -0.80 | 0.42 | 933  | 0.93 | 0.81 | 3.00 | -0.31 | 0.05 |
| PA5320 | 45020  | 5.88  | 691.24  | 13 | 39.77 | 0.96 | -0.06 | -0.29 | 0.77 | 1702 | 0.99 | 0.95 | -0.07 | -0.36 | 0.72 | 1597 | 0.97 | 0.95 | -0.07 | -0.30 | 0.76 | 1575 | 1.00 | 0.95 | 3.00 | -0.07 | 0.00 |
| PA5321 | 16533  | 5.35  | 329.25  | 5  | 35.10 | 1.54 | 0.62  | 2.10  | 0.04 | 266  | 0.29 | 0.96 | -0.06 | -0.34 | 0.74 | 1633 | 0.97 | 0.97 | -0.04 | -0.20 | 0.84 | 1723 | 1.00 | 1.15 | 3.00 | 0.21  | 0.33 |
| PA5322 | 54188  | 5.17  | 1331.10 | 30 | 47.65 | 0.95 | -0.08 | -0.35 | 0.73 | 1607 | 0.99 | 0.95 | -0.07 | -0.37 | 0.71 | 1584 | 0.97 | 0.93 | -0.11 | -0.43 | 0.67 | 1370 | 1.00 | 0.94 | 3.00 | -0.09 | 0.01 |

|        |       |       |         |    |       |      |       |       |      |      |      |      |       |        |      |      |      |      |       |       |      |      |      |      |      |       |      |
|--------|-------|-------|---------|----|-------|------|-------|-------|------|------|------|------|-------|--------|------|------|------|------|-------|-------|------|------|------|------|------|-------|------|
| PA5323 | 34613 | 6.32  | 967.34  | 19 | 51.78 | 0.99 | -0.01 | -0.12 | 0.90 | 1978 | 0.99 | 0.98 | -0.03 | -0.22  | 0.83 | 1823 | 0.98 | 0.96 | -0.07 | -0.28 | 0.78 | 1606 | 1.00 | 0.98 | 3.00 | -0.04 | 0.02 |
| PA5330 | 23620 | 9.09  | 429.40  | 9  | 43.11 | 0.75 | -0.42 | -1.56 | 0.12 | 433  | 0.59 | 0.74 | -0.43 | -1.69  | 0.09 | 420  | 0.46 | 0.72 | -0.48 | -1.68 | 0.09 | 383  | 0.50 | 0.74 | 3.00 | -0.44 | 0.02 |
| PA5331 | 24505 | 5.31  | 647.71  | 11 | 53.56 | 0.39 | -1.36 | -4.84 | 0.00 | 73   | 0.00 | 0.42 | -1.23 | -4.70  | 0.00 | 93   | 0.00 | 0.49 | -1.03 | -3.55 | 0.00 | 129  | 0.01 | 0.44 | 3.00 | -1.20 | 0.05 |
| PA5332 | 31451 | 5.33  | 328.33  | 8  | 22.30 | 0.18 | -2.51 | -8.90 | 0.00 | 20   | 0.00 | 0.13 | -2.90 | -10.91 | 0.00 | 19   | 0.00 | 0.14 | -2.88 | -9.82 | 0.00 | 31   | 0.00 | 0.15 | 3.00 | -2.75 | 0.02 |
| PA5334 | 27171 | 5.84  | 455.55  | 9  | 39.08 | 0.90 | -0.15 | -0.61 | 0.54 | 1201 | 0.98 | 0.90 | -0.15 | -0.64  | 0.52 | 1171 | 0.96 | 0.95 | -0.08 | -0.32 | 0.75 | 1542 | 1.00 | 0.92 | 3.00 | -0.12 | 0.03 |
| PA5335 | 33320 | 5.72  | 491.63  | 15 | 46.51 | 0.97 | -0.04 | -0.22 | 0.82 | 1803 | 0.99 | 0.99 | -0.02 | -0.17  | 0.87 | 1914 | 0.98 | 0.97 | -0.05 | -0.23 | 0.82 | 1680 | 1.01 | 0.97 | 3.00 | -0.04 | 0.01 |
| PA5336 | 23808 | 5.40  | 465.94  | 12 | 30.50 | 1.00 | 0.00  | -0.06 | 0.95 | 2066 | 1.00 | 0.98 | -0.03 | -0.20  | 0.84 | 1851 | 0.98 | 0.89 | -0.17 | -0.62 | 0.53 | 1145 | 0.96 | 0.96 | 3.00 | -0.06 | 0.06 |
| PA5337 | 10535 | 4.20  | 121.54  | 3  | 37.50 | 0.83 | -0.27 | -1.03 | 0.30 | 752  | 0.88 | 0.85 | -0.23 | -0.94  | 0.35 | 836  | 0.90 | 0.82 | -0.28 | -1.00 | 0.32 | 756  | 0.86 | 0.84 | 3.00 | -0.26 | 0.02 |
| PA5338 | 84800 | 9.11  | 464.56  | 12 | 15.95 | 1.14 | 0.19  | 0.59  | 0.56 | 1228 | 0.98 | 1.15 | 0.20  | 0.66   | 0.51 | 1132 | 0.97 | 1.18 | 0.24  | 0.76  | 0.44 | 980  | 0.93 | 1.16 | 3.00 | 0.21  | 0.02 |
| PA5339 | 14754 | 5.10  | 1068.44 | 22 | 84.97 | 0.90 | -0.16 | -0.63 | 0.53 | 1164 | 0.99 | 1.22 | 0.28  | 0.95   | 0.34 | 826  | 0.89 | 1.02 | 0.03  | 0.03  | 0.97 | 2007 | 1.00 | 1.04 | 3.00 | 0.06  | 0.16 |
| PA5343 | 31232 | 5.81  | 356.74  | 8  | 26.21 | 0.92 | -0.13 | -0.53 | 0.60 | 1317 | 0.99 | 0.79 | -0.34 | -1.36  | 0.17 | 542  | 0.69 | 0.82 | -0.29 | -1.02 | 0.31 | 737  | 0.86 | 0.84 | 3.00 | -0.25 | 0.07 |
| PA5344 | 36331 | 6.27  | 441.44  | 12 | 39.88 | 0.90 | -0.15 | -0.62 | 0.54 | 1182 | 0.99 | 0.82 | -0.28 | -1.14  | 0.25 | 676  | 0.81 | 0.94 | -0.09 | -0.36 | 0.72 | 1473 | 1.00 | 0.89 | 3.00 | -0.17 | 0.06 |
| PA5345 | 79145 | 6.83  | 143.61  | 4  | 7.75  | 0.99 | -0.01 | -0.13 | 0.90 | 1969 | 0.99 | 1.07 | 0.09  | 0.24   | 0.81 | 1795 | 0.98 | 0.92 | -0.12 | -0.46 | 0.64 | 1321 | 1.00 | 0.99 | 3.00 | -0.01 | 0.07 |
| PA5346 | 53643 | 5.76  | 297.49  | 7  | 20.30 | 1.02 | 0.03  | 0.04  | 0.97 | 2122 | 0.99 | 1.08 | 0.11  | 0.32   | 0.75 | 1660 | 0.98 | 1.00 | 0.00  | -0.04 | 0.97 | 1985 | 1.00 | 1.04 | 3.00 | 0.05  | 0.04 |
| PA5348 | 11130 | 10.49 | 448.02  | 13 | 71.30 | 4.05 | 2.02  | 7.00  | 0.00 | 35   | 0.00 | 3.39 | 1.76  | 6.46   | 0.00 | 53   | 0.00 | 5.31 | 2.41  | 8.11  | 0.00 | 34   | 0.00 | 4.25 | 3.00 | 2.09  | 0.98 |
| PA5349 | 42787 | 5.50  | 454.45  | 11 | 26.53 | 0.75 | -0.42 | -1.56 | 0.12 | 437  | 0.60 | 0.76 | -0.39 | -1.56  | 0.12 | 471  | 0.55 | 0.68 | -0.56 | -1.94 | 0.05 | 313  | 0.34 | 0.73 | 3.00 | -0.45 | 0.04 |
| PA5357 | 19736 | 4.96  | 133.13  | 3  | 24.50 | 0.88 | -0.19 | -0.75 | 0.46 | 1027 | 0.96 | 1.04 | 0.06  | 0.13   | 0.90 | 1982 | 0.98 | 0.93 | -0.10 | -0.40 | 0.69 | 1413 | 1.00 | 0.95 | 3.00 | -0.07 | 0.08 |
| PA5360 | 27327 | 5.27  | 325.29  | 6  | 24.43 | 1.07 | -0.10 | 0.28  | 0.78 | 1726 | 0.98 | 1.11 | 0.15  | 0.47   | 0.64 | 1436 | 0.96 | 1.25 | 0.32  | 1.04  | 0.30 | 722  | 0.86 | 1.14 | 3.00 | 0.20  | 0.09 |
| PA5362 | 53314 | 5.58  | 60.64   | 3  | 5.73  | 0.98 | -0.39 | -0.20 | 0.85 | 1863 | 0.99 | 0.96 | -0.06 | -0.33  | 0.74 | 1645 | 0.98 | 0.88 | -0.18 | -0.67 | 0.50 | 1096 | 0.95 | 0.94 | 3.00 | -0.09 | 0.05 |
| PA5364 | 35545 | 9.05  | 137.60  | 2  | 11.85 | 1.31 | 0.29  | 1.29  | 0.20 | 570  | 0.75 | 0.68 | -0.56 | -2.19  | 0.03 | 289  | 0.21 | 1.02 | 0.03  | 0.05  | 0.96 | 1978 | 1.00 | 1.00 | 3.00 | 0.01  | 0.32 |
| PA5365 | 28859 | 5.21  | 390.95  | 10 | 49.31 | 1.06 | 0.08  | 0.21  | 0.84 | 1837 | 0.99 | 1.11 | 0.15  | 0.46   | 0.65 | 1444 | 0.97 | 1.11 | 0.15  | 0.46  | 0.65 | 1328 | 1.00 | 1.09 | 3.00 | 0.13  | 0.03 |
| PA5366 | 33659 | 5.91  | 291.37  | 9  | 30.29 | 1.21 | 0.27  | 0.87  | 0.38 | 902  | 0.93 | 1.20 | 0.27  | 0.90   | 0.37 | 865  | 0.92 | 1.14 | 0.18  | 0.57  | 0.57 | 1210 | 0.97 | 1.18 | 3.00 | 0.24  | 0.04 |
| PA5367 | 65033 | 7.90  | 306.04  | 8  | 10.93 | 1.55 | 0.63  | 2.15  | 0.03 | 258  | 0.27 | 1.27 | 0.35  | 1.21   | 0.23 | 627  | 0.79 | 1.41 | 0.50  | 1.63  | 0.10 | 400  | 0.53 | 1.41 | 3.00 | 0.50  | 0.14 |
| PA5368 | 76971 | 6.01  | 344.08  | 7  | 7.41  | 1.20 | 0.26  | 0.82  | 0.41 | 953  | 0.94 | 1.18 | 0.24  | 0.81   | 0.42 | 960  | 0.94 | 1.09 | 0.12  | 0.35  | 0.72 | 1488 | 1.00 | 1.16 | 3.00 | 0.21  | 0.06 |
| PA5369 | 38723 | 9.13  | 232.54  | 8  | 25.40 | 1.30 | -0.38 | 1.24  | 0.22 | 605  | 0.77 | 1.24 | 0.32  | 1.08   | 0.28 | 729  | 0.83 | 1.10 | 0.13  | 0.39  | 0.70 | 1431 | 1.00 | 1.21 | 3.00 | 0.28  | 0.10 |
| PA5373 | 56221 | 5.25  | 360.94  | 10 | 19.68 | 0.61 | -0.70 | -2.55 | 0.01 | 196  | 0.12 | 0.75 | -0.42 | -1.65  | 0.10 | 436  | 0.49 | 0.65 | -0.62 | -2.17 | 0.03 | 276  | 0.23 | 0.67 | 3.00 | -0.58 | 0.07 |
| PA5376 | 47232 | 7.11  | 54.63   | 2  | 8.70  | 0.72 | -0.47 | -1.72 | 0.08 | 367  | 0.50 | 0.74 | -0.43 | -1.72  | 0.09 | 413  | 0.45 | 0.80 | -0.33 | -1.17 | 0.24 | 629  | 0.79 | 0.75 | 3.00 | -0.41 | 0.04 |
| PA5378 | 38048 | 6.77  | 115.87  | 4  | 12.65 | 0.83 | -0.27 | -1.03 | 0.30 | 756  | 0.88 | 0.65 | -0.63 | -2.44  | 0.01 | 244  | 0.13 | 0.90 | -0.15 | -0.55 | 0.58 | 1223 | 0.98 | 0.79 | 3.00 | -0.33 | 0.13 |
| PA5406 | 12838 | 4.31  | 200.03  | 5  | 33.66 | 0.76 | -0.39 | -1.45 | 0.15 | 485  | 0.66 | 0.64 | -0.64 | -2.49  | 0.01 | 237  | 0.12 | 1.02 | 0.02  | 0.02  | 0.99 | 2042 | 1.00 | 0.81 | 3.00 | -0.31 | 0.19 |
| PA5413 | 40326 | 5.18  | 750.04  | 16 | 39.41 | 1.12 | 0.17  | 0.51  | 0.61 | 1341 | 0.99 | 1.22 | 0.28  | 0.96   | 0.34 | 819  | 0.89 | 1.09 | 0.12  | 0.35  | 0.73 | 1499 | 1.00 | 1.14 | 3.00 | 0.19  | 0.07 |
| PA5422 | 37421 | 5.28  | 181.93  | 5  | 18.04 | 0.89 | -0.04 | -0.23 | 0.82 | 1801 | 0.99 | 1.06 | 0.09  | 0.22   | 0.82 | 1815 | 0.98 | 1.16 | 0.21  | 0.66  | 0.51 | 1103 | 0.95 | 1.06 | 3.00 | 0.09  | 0.09 |
| PA5428 | 34473 | 6.68  | 133.33  | 4  | 18.45 | 0.90 | -0.15 | -0.60 | 0.55 | 1206 | 0.98 | 1.27 | 0.35  | 1.19   | 0.23 | 636  | 0.79 | 0.81 | -0.30 | -1.07 | 0.28 | 689  | 0.85 | 1.00 | 3.00 | -0.01 | 0.24 |
| PA5429 | 53815 | 5.55  | 2023.50 | 39 | 61.84 | 1.54 | 0.62  | 2.10  | 0.04 | 264  | 0.29 | 1.51 | 0.59  | 2.12   | 0.03 | 303  | 0.25 | 1.50 | 0.59  | -1.94 | 0.05 | 314  | 0.34 | 1.52 | 3.00 | 0.60  | 0.02 |
| PA5435 | 71282 | 5.59  | 1460.45 | 30 | 35.97 | 1.84 | 0.88  | 3.00  | 0.00 | 155  | 0.04 | 2.15 | 1.11  | 4.02   | 0.00 | 116  | 0.00 | 2.22 | 1.15  | 3.85  | 0.00 | 118  | 0.00 | 2.07 | 3.00 | 1.05  | 0.21 |
| PA5436 | 54745 | 6.19  | 832.71  | 21 | 33.57 | 1.76 | 0.81  | 2.78  | 0.01 | 170  | 0.07 | 1.85 | 0.88  | 3.20   | 0.00 | 164  | 0.02 | 1.90 | 0.93  | 3.08  | 0.00 | 162  | 0.03 | 1.84 | 3.00 | 0.88  | 0.07 |
| PA5438 | 33686 | 6.73  | 158.37  | 6  | 25.30 | 0.96 | -0.07 | -0.31 | 0.76 | 1665 | 0.99 | 0.87 | -0.21 | -0.87  | 0.38 | 896  | 0.93 | 0.92 | -0.11 | -0.44 | 0.66 | 1353 | 1.00 | 0.92 | 3.00 | -0.13 | 0.05 |
| PA5441 | 85399 | 4.90  | 1533.69 | 34 | 46.76 | 1.02 | 0.02  | 0.00  | 1.00 | 2168 | 1.00 | 0.95 | -0.07 | -0.36  | 0.72 | 1594 | 0.97 | 0.99 | -0.01 | -0.10 | 0.92 | 1887 | 1.00 | 0.99 | 3.00 | -0.02 | 0.03 |
| PA5443 | 84804 | 5.60  | 1212.84 | 27 | 34.12 | 0.91 | -0.13 | -0.53 | 0.59 | 1303 | 0.99 | 0.96 | -0.05 | -0.30  | 0.77 | 1685 | 0.98 | 0.90 | -0.15 | -0.58 | 0.56 | 1206 | 0.96 | 0.93 | 3.00 | -0.11 | 0.03 |
| PA5445 | 56519 | 5.87  | 1129.45 | 25 | 35.94 | 0.51 | -0.98 | -3.51 | 0.00 | 115  | 0.01 | 0.34 | -1.57 | -5.56  | 0.00 | 65   | 0.00 | 0.41 | -1.30 | -4.47 | 0.00 | 97   | 0.00 | 0.42 | 3.00 | -1.26 | 0.09 |
| PA5446 | 8308  | 11.71 | 63.99   | 2  | 26.10 | 1.60 | 0.68  | 2.29  | 0.02 | 235  | 0.20 | 1.97 | 0.98  | 3.54   | 0.00 | 140  | 0.01 | 2.89 | 1.53  | 5.12  | 0.00 | 81   | 0.00 | 2.15 | 3.00 | 1.10  | 0.66 |
| PA5456 | 51149 | 5.91  | 73.51   | 2  | 4.00  | 1.37 | 0.46  | 1.53  | 0.13 | 455  | 0.61 | 1.85 | 0.89  | 3.21   | 0.00 | 161  | 0.02 | 1.16 | 0.22  | 0.68  | 0.50 | 1088 | 0.95 | 1.46 | 3.00 | 0.55  | 0.35 |
| PA5459 | 32307 | 4.90  | 170.91  | 5  | 19.98 | 1.66 | 0.73  | 2.48  | 0.01 | 208  | 0.14 | 1.84 | 0.88  | 3.19   | 0.00 | 165  | 0.02 | 1.72 | 0.78  | 2.59  | 0.01 | 215  | 0.09 | 1.74 | 3.00 | 0.80  | 0.09 |







|        |       |       |        |    |       |      |       |       |      |      |      |       |       |       |      |      |      |       |      |       |      |
|--------|-------|-------|--------|----|-------|------|-------|-------|------|------|------|-------|-------|-------|------|------|------|-------|------|-------|------|
| PA2601 | 33260 | 5.56  | 39.87  | 2  | 10.10 | 0.94 | -0.08 | -0.37 | 0.71 | 1579 | 0.98 | 0.88  | -0.18 | -0.76 | 0.45 | 1027 | 0.95 | 0.91  | 2.00 | -0.13 | 0.04 |
| PA2605 | 14457 | 5.51  | 121.78 | 4  | 19.85 | 0.94 | -0.08 | -0.38 | 0.71 | 1563 | 0.98 |       |       |       |      |      |      | 0.90  | 2.00 | -0.15 | 0.06 |
| PA2609 | 38371 | 6.25  | 92.97  | 3  | 9.80  | 0.95 | -0.07 | -0.32 | 0.75 | 1650 | 0.99 | 0.77  | -0.37 | -1.48 | 0.14 | 503  | 0.60 | 0.86  | 2.00 | -0.21 | 0.13 |
| PA2621 | 9936  | 4.80  | 72.44  | 3  | 24.40 | 0.82 | -0.29 | -1.12 | 0.26 | 685  | 0.84 | 1.07  | 0.10  | 0.27  | 0.79 | 1747 | 0.98 | 0.94  | 2.00 | -0.09 | 0.18 |
| PA2622 | 10603 | 5.54  | 104.65 | 3  | 40.00 | 0.79 | -0.35 | -1.30 | 0.19 | 566  | 0.75 | 0.64  | -0.65 | -2.52 | 0.01 | 228  | 0.11 | 0.71  | 2.00 | -0.49 | 0.11 |
| PA2648 | 57534 | 7.21  | 110.62 | 2  | 4.30  | 0.98 | -0.03 | -0.20 | 0.84 | 1848 | 0.99 | 1.23  | 0.30  | 1.00  | 0.32 | 792  | 0.86 | 1.10  | 2.00 | 0.14  | 0.18 |
| PA2657 | 25526 | 5.62  | 60.54  | 2  | 6.30  | 0.92 | -0.13 | -0.52 | 0.60 | 1326 | 0.99 | 0.97  | -0.05 | -0.27 | 0.79 | 1742 | 0.98 | 0.97  | 2.00 | -0.05 | 0.07 |
| PA2679 | 28483 | 5.29  | 81.15  | 2  | 12.80 | 1.09 | 0.12  | 0.34  | 0.74 | 1623 | 0.99 | 0.96  | -0.06 | -0.33 | 0.74 | 1644 | 0.98 | 1.03  | 2.00 | 0.04  | 0.08 |
| PA2720 | 24469 | 4.97  | 177.02 | 3  | 18.23 | 1.37 | 0.46  | 1.52  | 0.13 | 456  | 0.61 | 0.96  | -0.24 | -1.00 | 0.32 | 798  | 0.86 | 1.17  | 2.00 | 0.22  | 0.29 |
| PA2730 | 39451 | 5.97  | 59.72  | 2  | 5.50  | 1.04 | 0.06  | 0.14  | 0.89 | 1948 | 0.99 | 1.18  | 0.24  | 0.81  | 0.42 | 969  | 0.94 | 1.11  | 2.00 | 0.16  | 0.10 |
| PA2737 | 11112 | 9.81  | 68.49  | 2  | 32.90 |      |       |       |      |      |      | 1.15  | 0.20  | 0.64  | 0.52 | 1183 | 0.96 | 1.41  | 2.00 | 0.50  | 0.37 |
| PA2742 | 9377  | 12.24 | 52.71  | 2  | 10.90 | 0.98 | -0.03 | -0.18 | 0.85 | 1877 | 0.99 | 0.98  | -0.03 | -0.21 | 0.84 | 1848 | 0.98 | 0.98  | 2.00 | -0.03 | 0.00 |
| PA2813 | 24248 | 5.06  | 51.52  | 2  | 16.00 | 0.97 | -0.04 | -0.23 | 0.81 | 1791 | 0.99 | 0.85  | -0.24 | -1.00 | 0.32 | 798  | 0.86 | 0.91  | 2.00 | -0.14 | 0.09 |
| PA2815 | 93876 | 5.69  | 85.71  | 3  | 5.07  | 0.97 | -0.05 | -0.25 | 0.80 | 1762 | 0.99 | 0.65  | -0.62 | -2.39 | 0.02 | 252  | 0.14 | 0.81  | 2.00 | -0.31 | 0.22 |
| PA2820 | 31471 | 8.61  | 134.85 | 3  | 15.47 | 0.79 | -0.34 | -1.29 | 0.20 | 572  | 0.75 | 0.76  | -0.39 | -1.56 | 0.12 | 473  | 0.55 | 0.90  | 2.00 | -0.16 | 0.16 |
| PA2821 | 25946 | 5.88  | 63.68  | 2  | 9.30  |      |       |       |      |      |      | 1.02  | 0.03  | 0.02  | 0.98 | 2133 | 1.00 | 0.97  | 2.00 | -0.37 | 0.01 |
| PA2822 | 17879 | 4.63  | 84.71  | 3  | 16.90 | 0.91 | -0.14 | -0.57 | 0.57 | 1257 | 0.98 | 1.02  | -0.18 | -0.78 | 0.44 | 1004 | 0.94 | 0.95  | 2.00 | -0.07 | 0.05 |
| PA2829 | 17188 | 5.37  | 76.41  | 2  | 11.35 | 0.92 | -0.12 | -0.50 | 0.62 | 1362 | 0.99 | 0.88  | -0.32 | -1.28 | 0.20 | 584  | 0.74 | 0.97  | 2.00 | -0.05 | 0.08 |
| PA2906 | 52936 | 8.30  | 85.88  | 3  | 7.97  | 1.30 | 0.38  | 1.27  | 0.21 | 584  | 0.76 | 0.80  | -0.18 | -0.78 | 0.44 | 1004 | 0.94 | 1.09  | 2.00 | 0.13  | 0.30 |
| PA2911 | 82115 | 6.24  | 125.23 | 3  | 5.63  | 0.85 | -0.24 | -0.93 | 0.35 | 842  | 0.91 | 0.82  | -0.32 | -1.14 | 0.25 | 675  | 0.81 | 0.82  | 2.00 | -0.28 | 0.03 |
| PA2942 | 37526 | 5.63  | 204.81 | 4  | 15.40 |      |       |       |      |      |      | 0.82  | -0.28 | -1.14 | 0.25 | 675  | 0.81 | 0.94  | 2.00 | -0.18 | 0.09 |
| PA2962 | 23397 | 5.14  | 238.80 | 6  | 19.53 | 0.93 | -0.11 | -0.47 | 0.64 | 1409 | 0.99 | 0.86  | -0.22 | -0.90 | 0.37 | 860  | 0.92 | 0.94  | 2.00 | -0.16 | 0.05 |
| PA3031 | 8774  | 4.92  | 201.40 | 3  | 35.60 | 0.65 | -0.62 | -2.26 | 0.02 | 243  | 0.21 |       |       |       |      |      |      | 0.89  | 2.00 | -0.36 | 0.18 |
| PA3035 | 22957 | 8.07  | 66.55  | 2  | 9.60  | 1.06 | 0.08  | 0.21  | 0.83 | 1824 | 0.99 | 0.91  | -0.14 | -0.52 | 0.61 | 1259 | 0.99 | 0.78  | 2.00 | -0.05 | 0.04 |
| PA3084 | 32016 | 7.52  | 69.09  | 2  | 8.60  | 0.76 | -0.40 | -1.48 | 0.14 | 470  | 0.64 | 1.01  | 0.01  | -0.03 | 0.97 | 2013 | 1.00 | 1.03  | 2.00 | 0.05  | 0.04 |
| PA3185 | 33324 | 7.72  | 65.43  | 2  | 8.50  | 0.70 | -0.52 | -1.92 | 0.05 | 297  | 0.40 | 0.98  | -0.03 | -0.15 | 0.88 | 1807 | 1.00 | 0.87  | 2.00 | -0.20 | 0.16 |
| PA3186 | 54895 | 5.48  | 669.71 | 15 | 53.70 | 8.40 | 3.07  | 10.70 | 0.00 | 18   | 0.00 | 1.05  | 0.07  | 0.15  | 0.88 | 1935 | 0.98 | 0.87  | 2.00 | -0.20 | 0.25 |
| PA3188 | 31961 | 9.24  | 87.57  | 2  | 6.40  |      |       |       |      |      |      | 12.59 | 0.07  | 0.15  | 0.88 | 1935 | 0.98 | 5.12  | 2.00 | 2.76  | 2.32 |
| PA3189 | 35774 | 9.76  | 342.22 | 7  | 12.56 | 9.51 | 3.25  | 11.32 | 0.00 | 19   | 0.00 | 4.25  | 2.09  | 7.68  | 0.00 | 36   | 0.00 | 11.02 | 2.00 | 3.56  | 1.11 |
| PA3199 | 24322 | 6.21  | 125.32 | 5  | 21.04 |      |       |       |      |      |      | 0.84  | -0.26 | -1.05 | 0.29 | 752  | 0.84 | 0.78  | 2.00 | -0.30 | 0.04 |
| PA3214 | 23967 | 9.97  | 82.62  | 2  | 11.20 | 0.88 | -0.18 | -0.73 | 0.47 | 1046 | 0.97 | 0.95  | -0.07 | -0.37 | 0.71 | 1575 | 0.97 | 0.92  | 2.00 | -0.13 | 0.05 |
| PA3246 | 25228 | 6.53  | 52.79  | 2  | 7.35  | 0.98 | -0.03 | -0.19 | 0.85 | 1869 | 0.99 | 1.11  | 0.15  | 0.44  | 0.66 | 1468 | 0.97 | 1.04  | 2.00 | 0.06  | 0.09 |
| PA3247 | 48006 | 5.65  | 107.34 | 4  | 5.75  | 0.90 | -0.15 | -0.60 | 0.55 | 1213 | 0.98 |       |       |       |      |      |      | 1.22  | 2.00 | 0.08  | 0.22 |
| PA3260 | 11208 | 4.83  | 116.10 | 4  | 25.20 | 0.91 | -0.13 | -0.53 | 0.60 | 1306 | 0.99 | 0.89  | -0.17 | -0.71 | 0.47 | 1072 | 0.96 | 0.90  | 2.00 | -0.15 | 0.02 |
| PA3267 | 71064 | 8.84  | 84.07  | 3  | 4.23  |      |       |       |      |      |      | 0.95  | -0.07 | -0.36 | 0.72 | 1606 | 0.97 | 0.94  | 2.00 | -0.08 | 0.01 |
| PA3314 | 29283 | 9.75  | 90.44  | 3  | 11.77 | 0.97 | -0.04 | -0.23 | 0.82 | 1798 | 0.99 | 1.11  | 0.16  | 0.49  | 0.63 | 1412 | 0.96 | 1.04  | 2.00 | 0.06  | 0.10 |
| PA3345 | 13798 | 5.56  | 53.40  | 2  | 26.70 | 0.97 | -0.04 | -0.23 | 0.82 | 1798 | 0.99 | 0.87  | -0.21 | -0.86 | 0.39 | 907  | 0.93 | 0.92  | 2.00 | -0.12 | 0.07 |
| PA3350 | 26779 | 8.52  | 54.76  | 2  | 7.80  | 0.86 | -0.22 | -0.85 | 0.40 | 925  | 0.93 | 1.95  | 0.96  | 3.49  | 0.00 | 143  | 0.01 | 0.87  | 2.00 | -0.21 | 0.01 |
| PA3364 | 43443 | 5.63  | 38.36  | 2  | 10.40 | 2.00 | 1.00  | 3.43  | 0.00 | 121  | 0.01 | 1.02  | 0.03  | 0.00  | 1.00 | 2158 | 1.00 | 0.63  | 2.00 | 0.98  | 0.04 |
| PA3385 | 12758 | 6.97  | 119.82 | 2  | 15.75 | 0.63 | -0.10 | -2.43 | 0.01 | 214  | 0.15 | 1.06  | 0.08  | 0.19  | 0.85 | 1867 | 0.98 | 0.69  | 2.00 | -0.60 | 0.04 |
| PA3439 | 15056 | 5.82  | 95.15  | 3  | 25.50 | 0.93 | -0.10 | -0.43 | 0.66 | 1462 | 0.99 | 0.81  | -0.30 | -1.21 | 0.23 | 628  | 0.78 | 0.84  | 2.00 | -0.20 | 0.08 |
| PA3475 | 32296 | 6.40  | 84.80  | 3  | 7.13  | 1.47 | 0.56  | 1.89  | 0.06 | 301  | 0.43 | 0.88  | -0.18 | -0.77 | 0.44 | 1012 | 0.94 | 0.84  | 2.00 | 0.37  | 0.45 |
| PA3477 | 29139 | 6.66  | 186.08 | 5  | 23.20 |      |       |       |      |      |      | 1.02  | 0.03  | 0.00  | 1.00 | 2158 | 1.00 | 0.63  | 2.00 | -0.40 | 0.18 |
| PA3560 | 61719 | 8.39  | 272.39 | 4  | 6.23  |      |       |       |      |      |      | 1.06  | 0.08  | 0.19  | 0.85 | 1867 | 0.98 | 0.69  | 2.00 | -0.23 | 0.23 |
| PA3623 | 32684 | 10.43 | 42.13  | 2  | 4.55  | 0.70 | -0.51 | -1.86 | 0.06 | 312  | 0.44 | 0.96  | -0.05 | -0.29 | 0.77 | 1697 | 0.98 | 0.85  | 2.00 | -0.18 | 0.25 |
| PA3626 | 40233 | 6.34  | 230.54 | 5  | 11.36 |      |       |       |      |      |      | 0.96  | -0.05 | -0.29 | 0.77 | 1697 | 0.98 | 0.85  | 2.00 | -0.14 | 0.08 |
| PA3631 | 45368 | 10.32 | 176.60 | 4  | 7.18  |      |       |       |      |      |      | 0.86  | -0.22 | -0.90 | 0.37 | 859  | 0.92 | 1.12  | 2.00 | -0.01 | 0.18 |
| PA3672 | 34625 | 6.18  | 38.77  | 2  | 10.70 | 0.96 | -0.06 | -0.31 | 0.76 | 1672 | 0.99 | 1.03  | 0.04  | 0.04  | 0.97 | 2109 | 0.99 | 1.03  | 2.00 | -0.01 | 0.05 |

|        |        |      |        |   |       |      |       |       |      |      |      |      |       |       |      |      |      |      |       |       |      |      |      |      |      |       |       |      |
|--------|--------|------|--------|---|-------|------|-------|-------|------|------|------|------|-------|-------|------|------|------|------|-------|-------|------|------|------|------|------|-------|-------|------|
| PA3691 | 16234  | 7.85 | 93.97  | 2 | 14.90 | 0.85 | -0.23 | -0.89 | 0.37 | 885  | 0.92 | 1.00 | 0.00  | -0.08 | 0.93 | 2033 | 0.99 | 0.93 | 2.00  | -0.11 | 0.11 |      |      |      |      |       |       |      |
| PA3696 | 28113  | 5.43 | 184.53 | 6 | 17.78 | 0.91 | -0.13 | -0.54 | 0.59 | 1294 | 0.99 | 0.79 | -0.35 | -1.38 | 0.17 | 537  | 0.67 | 0.85 | 2.00  | -0.23 | 0.09 |      |      |      |      |       |       |      |
| PA3704 | 86376  | 5.05 | 71.70  | 3 | 4.50  |      |       |       |      |      |      | 1.05 | 0.07  | 0.18  | 0.86 | 1900 | 0.98 | 1.02 | 0.02  | 0.98  | 2030 | 1.00 | 1.03 | 2.00 | 0.05 | 0.02  |       |      |
| PA3705 | 25410  | 5.35 | 143.55 | 3 | 20.40 | 0.65 | -0.63 | -2.28 | 0.02 | 237  | 0.21 |      |       |       |      |      |      | 0.66 | -0.60 | -2.08 | 0.04 | 290  | 0.27 | 0.65 | 2.00 | -0.61 | 0.01  |      |
| PA3706 | 47666  | 7.72 | 100.50 | 3 | 10.17 |      |       |       |      |      |      | 0.62 | -0.68 | -2.63 | 0.01 | 218  | 0.09 | 0.92 | -0.11 | -0.44 | 0.66 | 1357 | 1.00 | 0.77 | 2.00 | -0.37 | 0.21  |      |
| PA3717 | 13835  | 6.29 | 95.05  | 2 | 22.60 |      |       |       |      |      |      | 0.85 | -0.23 | -0.96 | 0.34 | 822  | 0.88 | 0.90 | -0.15 | -0.57 | 0.57 | 1214 | 0.97 | 0.88 | 2.00 | -0.19 | 0.04  |      |
| PA3730 | 24403  | 5.48 | 150.62 | 4 | 24.40 | 0.89 | -0.16 | -0.65 | 0.51 | 1134 | 0.98 | 0.72 | -0.47 | -1.83 | 0.07 | 379  | 0.38 | 1.04 | 0.06  | 0.14  | 0.89 | 1831 | 1.00 | 0.97 | 2.00 | -0.05 | 0.10  |      |
| PA3733 | 46801  | 5.73 | 74.09  | 2 | 4.30  | 0.84 | -0.24 | -0.94 | 0.35 | 832  | 0.91 |      |       |       |      |      |      | 0.78 | 2.00  | -0.35 | 0.09 |      |      | 0.78 | 2.00 | -0.35 | 0.09  |      |
| PA3748 | 49559  | 5.04 | 93.65  | 2 | 6.00  | 1.04 | 0.05  | 0.10  | 0.92 | 1998 | 1.00 |      |       |       |      |      |      | 1.05 | 0.07  | 0.19  | 0.85 | 1752 | 1.00 | 1.04 | 2.00 | 0.06  | 0.01  |      |
| PA3759 | 36959  | 5.56 | 97.00  | 3 | 12.17 | 0.84 | -0.25 | -0.94 | 0.35 | 827  | 0.91 | 1.33 | 0.41  | 1.43  | 0.15 | 519  | 0.64 | 1.31 | 0.39  | 1.26  | 0.21 | 577  | 0.75 | 1.08 | 2.00 | 0.11  | 0.33  |      |
| PA3760 | 91324  | 5.43 | 86.88  | 3 | 5.63  |      |       |       |      |      |      |      |       |       |      |      |      | 1.39 | 0.47  | 1.55  | 0.12 | 443  | 0.57 | 1.36 | 2.00 | 0.44  | 0.04  |      |
| PA3761 | 62496  | 8.24 | 46.82  | 2 | 2.65  | 1.16 | 0.22  | 0.68  | 0.50 | 1102 | 0.98 |      |       |       |      |      |      | 1.20 | 0.26  | 0.82  | 0.41 | 915  | 0.92 | 1.18 | 2.00 | 0.24  | 0.02  |      |
| PA3789 | 53542  | 9.64 | 99.36  | 4 | 9.05  | 0.63 | -0.68 | -2.45 | 0.01 | 210  | 0.15 | 0.93 | -0.10 | -0.46 | 0.65 | 1443 | 0.97 | 1.07 | 0.09  | 0.25  | 0.80 | 1650 | 1.00 | 0.96 | 2.00 | -0.06 | 0.15  |      |
| PA3795 | 36845  | 5.37 | 123.10 | 3 | 10.80 | 1.21 | 0.28  | 0.90  | 0.37 | 878  | 0.91 | 0.71 | -0.49 | -1.93 | 0.05 | 346  | 0.33 | 0.88 | -0.18 | -0.66 | 0.51 | 1110 | 0.95 | 0.79 | 2.00 | -0.33 | 0.13  |      |
| PA3811 | 21147  | 4.93 | 56.06  | 2 | 13.90 | 0.86 | -0.22 | -0.87 | 0.39 | 907  | 0.93 |      |       |       |      |      |      | 1.07 | 0.09  | 0.25  | 0.80 | 1650 | 1.00 | 0.96 | 2.00 | -0.33 | 0.13  |      |
| PA3840 | 39519  | 9.01 | 121.88 | 3 | 9.93  |      |       |       |      |      |      | 0.70 | -0.51 | -2.01 | 0.04 | 323  | 0.30 | 0.88 | -0.18 | -0.66 | 0.51 | 1110 | 0.95 | 0.79 | 2.00 | -0.06 | 0.15  |      |
| PA3852 | 35346  | 5.42 | 141.46 | 4 | 8.70  | 1.07 | 0.09  | 0.25  | 0.80 | 1767 | 0.99 | 0.84 | -0.25 | -1.03 | 0.30 | 770  | 0.85 |      |       |       |      |      |      | 0.95 | 2.00 | -0.07 | 0.16  |      |
| PA3919 | 54780  | 5.85 | 137.48 | 4 | 8.65  | 1.12 | 0.16  | 0.47  | 0.64 | 1404 | 0.99 | 0.84 | -0.25 | -1.03 | 0.31 | 771  | 0.86 |      |       |       |      |      |      | 0.98 | 2.00 | -0.03 | 0.19  |      |
| PA3941 | 22582  | 5.57 | 55.31  | 2 | 21.20 |      |       |       |      |      |      | 0.81 | -0.31 | -1.26 | 0.21 | 602  | 0.74 | 0.69 | -0.53 | -1.85 | 0.06 | 331  | 0.40 | 0.75 | 2.00 | -0.42 | 0.08  |      |
| PA3942 | 34211  | 5.57 | 274.72 | 4 | 17.83 | 0.58 | -0.78 | -2.82 | 0.00 | 167  | 0.06 | 0.93 | -0.11 | -0.51 | 0.61 | 1364 | 0.96 |      |       |       |      |      |      | 0.75 | 2.00 | -0.41 | 0.24  |      |
| PA3949 | 43734  | 9.53 | 67.89  | 2 | 9.50  | 1.09 | 0.13  | 0.37  | 0.71 | 1582 | 0.98 |      |       |       |      |      |      | 0.91 | -0.14 | -0.53 | 0.60 | 1241 | 0.99 | 1.00 | 2.00 | 0.00  | 0.13  |      |
| PA3951 | 19275  | 6.93 | 71.36  | 2 | 7.20  | 0.91 | -0.14 | -0.58 | 0.56 | 1235 | 0.98 | 1.12 | 0.16  | 0.49  | 0.62 | 1397 | 0.96 |      |       |       |      |      |      | 1.01 | 2.00 | 0.02  | 0.15  |      |
| PA3958 | 43524  | 5.67 | 67.08  | 2 | 5.80  | 1.00 | 0.01  | -0.06 | 0.95 | 2068 | 1.00 |      |       |       |      |      |      | 0.84 | -0.25 | -0.92 | 0.36 | 824  | 0.90 | 0.92 | 2.00 | -0.12 | 0.12  |      |
| PA3968 | 22683  | 9.68 | 33.21  | 2 | 9.80  | 0.65 | -0.62 | -2.25 | 0.02 | 245  | 0.22 | 0.96 | -0.06 | -0.31 | 0.76 | 1673 | 0.98 |      |       |       |      |      |      | 0.81 | 2.00 | -0.31 | 0.22  |      |
| PA3978 | 20194  | 4.57 | 43.50  | 2 | 9.90  | 0.97 | -0.04 | -0.23 | 0.82 | 1800 | 0.99 | 1.05 | 0.07  | 0.17  | 0.86 | 1908 | 0.98 |      |       |       |      |      |      | 1.01 | 2.00 | 0.02  | 0.06  |      |
| PA3982 | 18874  | 4.37 | 129.16 | 3 | 18.53 | 1.07 | 0.10  | 0.27  | 0.79 | 1737 | 0.99 | 1.28 | 0.36  | 1.24  | 0.21 | 615  | 0.75 |      |       |       |      |      |      | 1.18 | 2.00 | 0.24  | 0.15  |      |
| PA4026 | 19380  | 6.44 | 107.92 | 3 | 20.27 | 0.68 | -0.55 | -2.03 | 0.04 | 275  | 0.34 |      |       |       |      |      |      | 0.89 | -0.17 | -0.65 | 0.52 | 1117 | 0.95 | 0.78 | 2.00 | -0.35 | 0.15  |      |
| PA4032 | 28316  | 5.60 | 47.15  | 2 | 5.25  | 1.17 | 0.22  | 0.71  | 0.48 | 1075 | 0.97 | 1.11 | 0.15  | 0.45  | 0.65 | 1463 | 0.97 |      |       |       |      |      |      | 1.14 | 2.00 | 0.19  | 0.04  |      |
| PA4051 | 33645  | 4.68 | 85.65  | 2 | 10.20 |      |       |       |      |      |      | 1.18 | 0.24  | 0.81  | 0.42 | 966  | 0.94 |      |       |       |      |      |      | 0.76 | 2.00 | -0.04 | 0.30  |      |
| PA4060 | 10884  | 4.72 | 42.20  | 2 | 13.00 | 1.30 | 0.37  | 1.24  | 0.22 | 609  | 0.77 | 1.06 | 0.09  | 0.23  | 0.82 | 1811 | 0.98 |      |       |       |      |      |      | 0.68 | 2.00 | -0.02 | 0.44  |      |
| PA4135 | 17769  | 9.93 | 154.55 | 5 | 45.00 | 0.82 | -0.28 | -1.06 | 0.29 | 726  | 0.86 |      |       |       |      |      |      | 0.75 | -0.42 | -1.47 | 0.14 | 483  | 0.61 | 0.92 | 2.00 | -0.11 | 0.25  |      |
| PA4180 | 63169  | 5.91 | 129.79 | 3 | 7.53  | 1.10 | 0.14  | 0.39  | 0.69 | 1525 | 0.99 | 1.02 | 0.03  | 0.02  | 0.98 | 2131 | 1.00 |      |       |       |      |      |      | 0.87 | 2.00 | -0.20 | 0.22  |      |
| PA4190 | 44708  | 5.98 | 52.21  | 2 | 4.50  | 0.72 | -0.48 | -1.78 | 0.08 | 346  | 0.48 |      |       |       |      |      |      |      |       |       |      |      |      |      | 0.87 | 2.00  | -0.21 | 0.12 |
| PA4201 | 38712  | 5.16 | 93.11  | 2 | 12.70 | 0.78 | -0.35 | -1.32 | 0.19 | 556  | 0.73 | 0.95 | -0.08 | -0.38 | 0.71 | 1568 | 0.97 | 1.09 | 0.12  | 0.36  | 0.72 | 1485 | 1.00 | 0.98 | 2.00 | -0.04 | 0.16  |      |
| PA4282 | 142893 | 5.56 | 43.40  | 2 | 3.30  |      |       |       |      |      |      | 0.86 | -0.21 | -0.89 | 0.37 | 866  | 0.93 |      |       |       |      |      |      |      | 0.98 | 2.00  | -0.02 | 0.12 |
| PA4284 | 142781 | 5.47 | 73.93  | 3 | 2.53  | 1.34 | 0.42  | 1.39  | 0.17 | 520  | 0.69 | 1.23 | 0.30  | 1.02  | 0.31 | 776  | 0.85 | 1.30 | 0.37  | 1.21  | 0.23 | 607  | 0.77 | 1.20 | 2.00 | 0.26  | 0.14  |      |
| PA4290 | 59515  | 5.35 | 121.26 | 2 | 5.90  | 0.71 | -0.50 | -1.84 | 0.07 | 321  | 0.44 | 0.45 | -1.14 | -4.33 | 0.00 | 106  | 0.00 |      |       |       |      |      |      |      | 0.58 | 2.00  | -0.78 | 0.18 |
| PA4323 | 51718  | 9.79 | 68.15  | 3 | 5.67  | 1.14 | 0.19  | 0.59  | 0.56 | 1225 | 0.99 | 0.83 | -0.28 | -1.12 | 0.26 | 689  | 0.82 |      |       |       |      |      |      |      | 0.98 | 2.00  | -0.02 | 0.22 |
| PA4361 | 37484  | 8.22 | 57.92  | 3 | 9.10  | 1.10 | 0.14  | 0.42  | 0.67 | 1490 | 0.98 | 1.00 | 0.00  | -0.08 | 0.93 | 2032 | 0.99 | 1.30 | 0.37  | 1.21  | 0.23 | 607  | 0.77 | 1.20 | 2.00 | 0.26  | 0.14  |      |
| PA4367 | 80853  | 5.69 | 55.93  | 2 | 4.80  | 0.89 | -0.17 | -0.69 | 0.49 | 1091 | 0.97 | 1.00 | 0.00  | -0.08 | 0.93 | 2032 | 0.99 |      |       |       |      |      |      |      | 0.94 | 2.00  | -0.08 | 0.08 |
| PA4399 | 21911  | 5.88 | 58.78  | 2 | 14.35 |      |       |       |      |      |      | 1.39 | 0.48  | 1.68  | 0.09 | 425  | 0.47 | 1.01 | 0.02  | 0.00  | 1.00 | 2055 | 1.00 | 0.98 | 2.00 | 0.27  | 0.27  |      |
| PA4427 | 15162  | 4.57 | 56.07  | 2 | 25.90 | 1.04 | 0.06  | 0.12  | 0.90 | 1973 | 0.99 | 0.93 | -0.11 | -0.51 | 0.61 | 1369 | 0.97 | 0.85 | -0.23 | -0.84 | 0.40 | 892  | 0.92 | 0.92 | 2.00 | -0.12 | 0.09  |      |
| PA4476 | 146791 | 6.61 | 61.62  | 2 | 3.25  | 0.98 | -0.03 | -0.17 | 0.87 | 1906 | 0.99 |      |       |       |      |      |      | 0.85 | -0.23 | -0.84 | 0.40 | 892  | 0.92 | 0.92 | 2.00 | -0.12 | 0.09  |      |
| PA4487 | 29471  | 5.12 | 176.03 | 3 | 22.30 |      |       |       |      |      |      | 1.42 | 0.50  | 1.77  | 0.08 | 396  | 0.42 |      |       |       |      |      |      |      | 1.33 | 2.00  | 0.30  | 0.26 |
| PA4494 | 48137  | 6.26 | 75.42  | 2 | 5.10  | 1.12 | 0.16  | 0.49  | 0.62 | 1371 | 0.99 | 1.37 | 0.46  | 1.61  | 0.11 | 453  | 0.52 | 1.05 | 0.07  | 0.18  | 0.86 | 1771 | 1.00 | 1.23 | 2.00 | 0.32  | 0.18  |      |
| PA4499 | 21333  | 5.84 | 78.74  | 2 | 7.20  | 1.53 | 0.61  | 2.07  | 0.04 | 269  | 0.31 | 1.25 | 0.32  | 1.10  | 0.27 | 714  | 0.83 |      |       |       |      |      |      |      | 1.39 | 2.00  | 0.47  | 0.20 |
| PA4520 | 75170  | 5.06 | 63.89  | 2 | 8.60  | 1.30 | 0.38  | 1.25  | 0.21 | 601  | 0.77 |      |       |       |      |      |      | 0.92 | -0.13 | -0.49 | 0.63 | 1291 | 1.00 | 1.11 | 2.00 | 0.15  | 0.27  |      |
| PA4521 | 31252  | 8.89 | 111.09 | 2 | 7.75  | 0.92 | -0.12 | -0.50 | 0.62 | 1368 | 0.99 | 1.06 | 0.08  | 0.19  | 0.85 | 1868 | 0.98 |      |       |       |      |      |      |      | 0.99 | 2.00  | -0.02 | 0.09 |

|        |        |       |        |   |       |      |       |       |      |      |      |      |       |       |      |      |      |      |       |       |      |
|--------|--------|-------|--------|---|-------|------|-------|-------|------|------|------|------|-------|-------|------|------|------|------|-------|-------|------|
| PA4538 | 49409  | 8.38  | 131.48 | 4 | 10.55 | 0.96 | -0.06 | -0.27 | 0.78 | 1733 | 0.98 | 0.82 | -0.29 | -1.17 | 0.24 | 645  | 0.81 | 0.89 | 2.00  | -0.17 | 0.10 |
| PA4571 | 77495  | 6.20  | 324.13 | 8 | 11.98 | 0.84 | -0.25 | -0.95 | 0.34 | 822  | 0.91 | 0.96 | -0.05 | -0.29 | 0.77 | 1703 | 0.98 | 0.90 | 2.00  | -0.15 | 0.09 |
| PA4577 | 12077  | 5.17  | 51.24  | 2 | 11.55 | 0.73 | -0.46 | -1.70 | 0.09 | 374  | 0.51 | 0.88 | -0.19 | -0.80 | 0.43 | 977  | 0.94 | 0.80 | 2.00  | -0.32 | 0.11 |
| PA4585 | 37178  | 7.74  | 66.63  | 2 | 17.90 | 1.30 | 0.38  | 1.25  | 0.21 | 593  | 0.77 | 1.20 | 0.26  | 0.87  | 0.39 | 901  | 0.93 | 1.25 | 2.00  | 0.32  | 0.07 |
| PA4618 | 36092  | 5.51  | 104.84 | 4 | 8.95  | 0.93 | -0.10 | -0.42 | 0.67 | 1485 | 0.98 | 0.88 | -0.18 | -0.76 | 0.45 | 1021 | 0.94 | 0.91 | 2.00  | -0.14 | 0.04 |
| PA4698 | 12320  | 4.34  | 109.18 | 3 | 26.60 | 1.08 | 0.11  | 0.31  | 0.76 | 1662 | 0.99 | 0.99 | -0.02 | -0.15 | 0.88 | 1938 | 0.98 | 1.34 | 2.00  | 0.42  | 0.37 |
| PA4717 | 33033  | 5.87  | 166.03 | 3 | 14.50 | 0.87 | -0.20 | -0.78 | 0.44 | 998  | 0.95 | 0.68 | -0.56 | -2.20 | 0.03 | 286  | 0.21 | 0.93 | 2.00  | -0.10 | 0.08 |
| PA4769 | 29874  | 6.02  | 48.91  | 2 | 9.55  | 0.63 | -0.67 | -2.43 | 0.01 | 215  | 0.15 | 0.60 | -0.73 | -2.81 | 0.00 | 198  | 0.05 | 0.65 | 2.00  | -0.62 | 0.03 |
| PA4772 | 108275 | 6.21  | 154.29 | 5 | 4.40  |      |       |       |      |      |      | 0.60 | -0.36 | 1.26  | 0.21 | 604  | 0.74 | 0.35 | -1.52 | -5.20 | 0.00 |
| PA4773 | 17834  | 5.24  | 85.06  | 3 | 17.30 |      |       |       |      |      |      | 1.29 | 0.36  | 1.26  | 0.21 | 604  | 0.74 | 0.94 | -0.09 | -0.36 | 0.72 |
| PA4785 | 48742  | 6.69  | 38.38  | 2 | 4.90  | 1.02 | 0.03  | 0.03  | 0.97 | 1293 | 0.99 | 1.06 | 0.08  | 0.22  | 0.83 | 1822 | 0.98 | 0.90 | -0.14 | -0.55 | 0.58 |
| PA4846 | 16559  | 6.17  | 89.85  | 3 | 20.40 | 1.11 | 0.16  | 0.49  | 0.63 | 1413 | 0.96 | 1.11 | 0.16  | 0.49  | 0.63 | 1413 | 0.96 | 1.02 | 0.04  | 0.06  | 0.95 |
| PA4875 | 10938  | 5.02  | 55.58  | 2 | 25.50 | 0.83 | -0.26 | -1.07 | 0.28 | 730  | 0.84 | 0.83 | -0.26 | -1.07 | 0.28 | 730  | 0.84 | 0.85 | -0.24 | -0.86 | 0.39 |
| PA4876 | 13950  | 8.84  | 96.61  | 3 | 21.33 | 0.92 | -0.13 | -0.52 | 0.60 | 1328 | 0.99 | 0.94 | -0.09 | -0.43 | 0.67 | 1489 | 0.97 | 0.72 | -0.48 | -1.69 | 0.09 |
| PA4878 | 32204  | 6.42  | 94.81  | 3 | 14.07 | 1.71 | 0.77  | 2.63  | 0.01 | 184  | 0.10 | 0.94 | -0.09 | -0.43 | 0.67 | 1489 | 0.97 | 1.04 | 0.05  | 0.12  | 0.91 |
| PA4945 | 37234  | 7.12  | 122.83 | 4 | 11.98 | 1.25 | 0.32  | 1.06  | 0.29 | 730  | 0.86 | 1.32 | 0.41  | 1.41  | 0.16 | 525  | 0.65 | 2.49 | 1.32  | 4.40  | 0.00 |
| PA4955 | 57406  | 9.74  | 98.70  | 2 | 8.90  | 1.20 | 0.27  | 0.86  | 0.39 | 915  | 0.93 | 1.94 | 0.96  | 3.47  | 0.00 | 144  | 0.01 | 1.04 | 0.06  | 0.13  | 0.89 |
| PA4975 | 27445  | 5.69  | 133.65 | 4 | 9.73  |      |       |       |      |      |      | 1.94 | 0.96  | 3.47  | 0.00 | 144  | 0.01 | 2.49 | 1.32  | 4.40  | 0.00 |
| PA4988 | 47454  | 9.01  | 86.41  | 3 | 12.70 | 1.03 | 0.05  | 0.09  | 0.93 | 2013 | 1.00 | 0.97 | -0.04 | -0.25 | 0.80 | 1765 | 0.98 | 1.04 | 0.06  | 0.13  | 0.89 |
| PA5008 | 31341  | 10.06 | 52.98  | 3 | 18.00 | 1.71 | 0.77  | 2.63  | 0.01 | 184  | 0.10 | 0.97 | -0.04 | -0.25 | 0.80 | 1765 | 0.98 | 1.04 | 0.06  | 0.13  | 0.89 |
| PA5023 | 56230  | 5.48  | 52.23  | 2 | 7.20  | 1.18 | 0.24  | 0.75  | 0.45 | 1018 | 0.96 | 1.12 | 0.17  | 0.53  | 0.60 | 1325 | 0.97 | 1.04 | 0.06  | 0.13  | 0.89 |
| PA5035 | 56988  | 6.10  | 35.21  | 2 | 8.20  | 0.66 | -0.60 | -2.33 | 0.02 | 266  | 0.16 | 0.66 | -0.60 | -2.33 | 0.02 | 266  | 0.16 | 0.53 | -0.92 | -3.16 | 0.00 |
| PA5079 | 16431  | 5.90  | 127.45 | 5 | 40.68 | 0.93 | -0.11 | -0.46 | 0.64 | 1420 | 0.98 | 0.99 | -0.01 | -0.13 | 0.90 | 1977 | 0.98 | 0.98 | -0.03 | -0.17 | 0.86 |
| PA5108 | 10417  | 8.39  | 91.50  | 3 | 41.20 | 0.86 | -0.22 | -0.87 | 0.38 | 904  | 0.93 | 0.99 | -0.01 | -0.13 | 0.90 | 1977 | 0.98 | 0.98 | -0.03 | -0.17 | 0.86 |
| PA5111 | 21060  | 5.00  | 139.34 | 3 | 11.00 | 0.84 | -0.25 | -0.95 | 0.34 | 816  | 0.91 | 0.99 | -0.01 | -0.13 | 0.90 | 1977 | 0.98 | 0.94 | -0.08 | -0.34 | 0.73 |
| PA5121 | 84097  | 9.90  | 149.60 | 4 | 6.90  | 0.84 | -0.25 | -0.95 | 0.34 | 816  | 0.91 | 0.68 | -0.55 | -2.16 | 0.03 | 296  | 0.23 | 0.92 | -0.12 | -0.45 | 0.65 |
| PA5123 | 21144  | 6.42  | 39.09  | 2 | 10.75 | 0.97 | -0.04 | -0.22 | 0.83 | 1811 | 0.99 | 0.99 | -0.02 | -0.16 | 0.87 | 1921 | 0.98 | 0.92 | -0.12 | -0.45 | 0.65 |
| PA5127 | 18063  | 8.42  | 53.81  | 2 | 5.90  | 0.97 | -0.04 | -0.22 | 0.83 | 1811 | 0.99 | 0.99 | -0.02 | -0.16 | 0.87 | 1921 | 0.98 | 0.98 | -0.03 | -0.16 | 0.87 |
| PA5129 | 10235  | 6.70  | 49.90  | 2 | 10.10 | 1.09 | 0.12  | 0.34  | 0.73 | 1624 | 0.97 | 1.09 | 0.12  | 0.34  | 0.73 | 1624 | 0.97 | 1.18 | 0.24  | 0.74  | 0.46 |
| PA5148 | 11817  | 6.10  | 158.84 | 4 | 30.00 | 0.84 | -0.25 | -1.02 | 0.31 | 774  | 0.85 | 0.84 | -0.25 | -1.02 | 0.31 | 774  | 0.85 | 0.90 | -0.16 | -0.59 | 0.56 |
| PA5154 | 26157  | 9.65  | 127.21 | 3 | 19.90 | 1.58 | 0.66  | 2.24  | 0.03 | 248  | 0.22 | 1.87 | 0.90  | 3.27  | 0.00 | 157  | 0.01 | 0.90 | -0.16 | -0.59 | 0.56 |
| PA5158 | 54388  | 6.41  | 60.57  | 2 | 5.30  | 1.30 | 0.38  | 1.33  | 0.18 | 558  | 0.71 | 1.30 | 0.38  | 1.33  | 0.18 | 558  | 0.71 | 1.00 | 0.00  | -0.07 | 0.95 |
| PA5197 | 35027  | 9.35  | 97.92  | 3 | 7.43  | 1.32 | 0.40  | 1.31  | 0.19 | 558  | 0.74 | 0.87 | -0.20 | -0.83 | 0.41 | 947  | 0.93 | 0.90 | -0.14 | -0.55 | 0.58 |
| PA5208 | 26682  | 5.37  | 59.39  | 2 | 12.20 | 1.00 | 0.00  | -0.10 | 0.92 | 2002 | 1.00 | 0.87 | -0.20 | -0.83 | 0.41 | 947  | 0.93 | 1.11 | 0.00  | -0.07 | 0.95 |
| PA5248 | 69950  | 5.14  | 63.19  | 2 | 2.70  | 1.34 | 0.42  | 1.40  | 0.16 | 512  | 0.69 | 0.95 | -0.08 | -0.39 | 0.70 | 1554 | 0.97 | 0.94 | 0.00  | -0.07 | 0.95 |
| PA5259 | 27846  | 5.02  | 86.00  | 2 | 11.20 | 1.37 | 0.46  | 1.53  | 0.13 | 454  | 0.61 | 0.95 | -0.08 | -0.39 | 0.70 | 1554 | 0.97 | 1.14 | 2.00  | 0.02  | 0.19 |
| PA5269 | 10523  | 4.18  | 99.32  | 2 | 26.40 | 1.26 | 0.33  | 1.09  | 0.27 | 704  | 0.84 | 0.76 | -0.40 | -1.58 | 0.11 | 464  | 0.53 | 1.19 | 2.00  | 0.02  | 0.19 |
| PA5285 | 12746  | 4.74  | 39.71  | 2 | 21.00 | 1.17 | 0.22  | 0.69  | 0.49 | 1093 | 0.97 | 1.03 | 0.04  | 0.05  | 0.96 | 2090 | 0.99 | 1.01 | 2.00  | 0.01  | 0.35 |
| PA5303 | 13633  | 4.74  | 112.22 | 4 | 17.50 | 1.60 | 0.67  | 2.42  | 0.02 | 251  | 0.13 | 1.60 | 0.67  | 2.42  | 0.02 | 251  | 0.13 | 1.93 | 0.95  | 3.15  | 0.00 |
| PA5361 | 52009  | 6.99  | 61.09  | 2 | 2.70  | 0.95 | -0.07 | -0.32 | 0.75 | 1641 | 0.99 | 1.60 | 0.67  | 2.42  | 0.02 | 251  | 0.13 | 1.01 | 0.01  | -0.02 | 0.99 |
| PA5374 | 22758  | 8.79  | 81.79  | 3 | 15.23 | 0.92 | -0.11 | -0.52 | 0.60 | 1339 | 0.97 | 0.92 | -0.11 | -0.52 | 0.60 | 1339 | 0.97 | 0.72 | -0.47 | -1.64 | 0.10 |
| PA5412 | 94827  | 4.99  | 34.77  | 2 | 1.15  | 0.88 | -0.19 | -0.81 | 0.42 | 965  | 0.94 | 0.88 | -0.19 | -0.81 | 0.42 | 965  | 0.94 | 1.01 | 2.00  | 0.02  | 0.28 |
| PA5430 | 43219  | 10.63 | 48.83  | 2 | 4.70  | 1.02 | 0.03  | 0.03  | 0.97 | 1293 | 0.99 | 0.92 | -0.11 | -0.52 | 0.60 | 1339 | 0.97 | 1.36 | 0.44  | 1.43  | 0.15 |
| PA5437 | 36678  | 7.72  | 48.06  | 2 | 4.80  | 0.91 | -0.13 | -0.54 | 0.59 | 1293 | 0.99 | 0.88 | -0.19 | -0.81 | 0.42 | 965  | 0.94 | 0.91 | 2.00  | 0.02  | 0.28 |
| PA5440 | 53871  | 6.12  | 100.51 | 4 | 7.93  | 0.95 | -0.08 | -0.36 | 0.72 | 1588 | 0.99 | 0.99 | -0.02 | -0.15 | 0.88 | 1932 | 0.98 | 0.97 | 2.00  | 0.02  | 0.28 |
| PA5457 | 32773  | 5.84  | 135.20 | 4 | 11.15 | 1.44 | 0.53  | 1.77  | 0.08 | 348  | 0.48 | 1.05 | 0.07  | 0.18  | 0.86 | 1895 | 0.98 | 1.25 | 2.00  | 0.05  | 0.03 |
| PA5475 | 21551  | 5.02  | 36.33  | 2 | 11.55 | 0.72 | -0.47 | -1.72 | 0.09 | 369  | 0.51 | 0.87 | -0.20 | -0.83 | 0.41 | 941  | 0.93 | 0.80 | 2.00  | -0.33 | 0.11 |
| PA5484 | 67492  | 5.47  | 75.78  | 2 | 3.50  | 0.94 | -0.08 | -0.41 | 0.68 | 1521 | 0.97 | 0.94 | -0.08 | -0.41 | 0.68 | 1521 | 0.97 | 1.03 | 0.05  | 0.10  | 0.92 |

|        |        |       |        |   |       |      |       |       |      |      |      |      |       |       |      |      |      |       |       |       |      |      |      |      |      |       |      |  |  |  |  |  |
|--------|--------|-------|--------|---|-------|------|-------|-------|------|------|------|------|-------|-------|------|------|------|-------|-------|-------|------|------|------|------|------|-------|------|--|--|--|--|--|
| PA5498 | 35134  | 5.78  | 222.95 | 6 | 15.73 | 1.00 | 0.00  | -0.09 | 0.93 | 2012 | 1.00 | 0.95 | -0.07 | -0.37 | 0.71 | 1586 | 0.97 | 0.99  | -0.02 | -0.13 | 0.90 | 1843 | 1.00 | 0.97 | 2.00 | -0.04 | 0.03 |  |  |  |  |  |
| PA5502 | 29208  | 6.52  | 145.23 | 5 | 16.58 | 1.04 | 0.06  | 0.14  | 0.89 | 1954 | 0.99 | 1.12 | 0.17  | 0.53  | 0.60 | 1331 | 0.97 |       | 1.06  | 2.00  | 0.09 | 0.09 |      |      |      |       |      |  |  |  |  |  |
| PA5518 | 61388  | 5.75  | 136.60 | 4 | 5.73  | 1.00 | 0.00  | -0.08 | 0.93 | 2033 | 1.00 | 1.12 | 0.17  | 0.53  | 0.60 | 1335 | 0.97 |       | 1.10  | 2.00  | 0.14 | 0.03 |      |      |      |       |      |  |  |  |  |  |
| PA5522 | 51276  | 5.50  | 104.16 | 3 | 11.60 | 1.08 | 0.11  | 0.31  | 0.76 | 1664 | 0.99 | 1.12 | 0.17  | 0.53  | 0.60 | 1335 | 0.97 |       | 1.82  | 2.00  | 0.86 | 0.19 |      |      |      |       |      |  |  |  |  |  |
| PA5545 | 36489  | 6.98  | 85.20  | 2 | 8.20  | 1.68 | 0.75  | 2.55  | 0.01 | 195  | 0.12 | 1.95 | 0.96  | 3.21  | 0.00 | 153  | 0.02 | 0.96  | 2.00  | -0.06 | 0.16 |      |      |      |      |       |      |  |  |  |  |  |
| PA5550 | 29156  | 5.70  | 79.91  | 3 | 14.50 | 0.84 | -0.25 | -0.95 | 0.34 | 824  | 0.91 |      |       |       |      |      |      |       |       |       |      | 1.07 | 0.10 | 0.28 | 0.78 | 1718  | 0.98 |  |  |  |  |  |
| PA0012 | 10302  | 5.52  | 57.28  | 2 | 47.70 | 1.29 | 0.37  | 1.23  | 0.22 | 611  | 0.78 |      |       |       |      |      |      |       |       |       |      |      |      |      |      |       |      |  |  |  |  |  |
| PA0022 | 20929  | 6.05  | 123.02 | 3 | 11.13 | 0.92 | -0.13 | -0.52 | 0.60 | 1324 | 0.99 |      |       |       |      |      |      |       |       |       |      |      |      |      |      |       |      |  |  |  |  |  |
| PA0065 | 25696  | 5.71  | 72.05  | 3 | 13.40 | 0.94 | -0.08 | -0.37 | 0.71 | 1567 | 0.98 |      |       |       |      |      |      |       |       |       |      |      |      |      |      |       |      |  |  |  |  |  |
| PA0072 | 43031  | 9.42  | 32.38  | 2 | 4.65  | 1.03 | 0.04  | 0.06  | 0.95 | 2067 | 1.00 |      |       |       |      |      |      |       |       |       |      |      |      |      |      |       |      |  |  |  |  |  |
| PA0114 | 24682  | 7.79  | 104.76 | 3 | 20.53 | 0.99 | -0.01 | -0.13 | 0.89 | 1960 | 0.99 |      |       |       |      |      |      |       |       |       |      |      |      |      |      |       |      |  |  |  |  |  |
| PA0133 | 34407  | 6.42  | 54.44  | 2 | 6.90  | 1.07 | 0.10  | 0.29  | 0.78 | 1705 | 0.99 |      |       |       |      |      |      |       |       |       |      |      |      |      |      |       |      |  |  |  |  |  |
| PA0159 | 35324  | 5.70  | 147.77 | 4 | 11.05 | 0.98 | -0.04 | -0.21 | 0.84 | 1838 | 0.99 | 1.38 | 0.46  | 1.62  | 0.11 | 448  | 0.51 |       |       |       |      |      |      |      |      |       |      |  |  |  |  |  |
| PA0163 | 30520  | 9.02  | 30.61  | 2 | 6.20  |      |       |       |      |      |      |      |       |       |      |      |      |       |       |       |      |      |      |      |      |       |      |  |  |  |  |  |
| PA0164 | 59937  | 6.09  | 32.03  | 2 | 4.30  | 0.71 | -0.49 | -1.81 | 0.07 | 335  | 0.45 |      |       |       |      |      |      |       |       |       |      |      |      |      |      |       |      |  |  |  |  |  |
| PA0223 | 33067  | 5.33  | 58.67  | 2 | 8.20  |      |       |       |      |      |      |      |       |       |      |      |      |       |       |       |      |      |      |      |      |       |      |  |  |  |  |  |
| PA0230 | 50041  | 5.87  | 108.78 | 3 | 10.00 |      |       |       |      |      |      |      |       |       |      |      |      |       |       |       |      |      |      |      |      |       |      |  |  |  |  |  |
| PA0231 | 28538  | 5.20  | 55.05  | 2 | 7.75  |      |       |       |      |      |      |      |       |       |      |      |      |       |       |       |      |      |      |      |      |       |      |  |  |  |  |  |
| PA0259 | 55052  | 5.21  | 71.04  | 2 | 6.30  | 1.00 | 0.00  | -0.08 | 0.94 | 2041 | 1.00 | 0.66 | -0.60 | -2.35 | 0.02 | 262  | 0.15 |       |       |       |      |      |      |      |      |       |      |  |  |  |  |  |
| PA0261 | 19376  | 8.28  | 35.06  | 2 | 32.10 |      |       |       |      |      |      |      |       |       |      |      |      |       |       |       |      |      |      |      |      |       |      |  |  |  |  |  |
| PA0294 | 24933  | 5.98  | 44.55  | 2 | 6.35  |      |       |       |      |      |      |      |       |       |      |      |      |       |       |       |      |      |      |      |      |       |      |  |  |  |  |  |
| PA0303 | 33872  | 5.15  | 119.71 | 2 | 5.10  | 1.30 | 0.38  | 1.25  | 0.21 | 591  | 0.77 |      |       |       |      |      |      | 1.07  | 0.10  | 0.27  | 0.79 | 1736 | 0.98 |      |      |       |      |  |  |  |  |  |
| PA0304 | 33056  | 9.33  | 67.46  | 2 | 11.10 | 0.98 | -0.02 | -0.16 | 0.87 | 1915 | 0.99 |      |       |       |      |      |      |       |       |       |      |      |      |      |      |       |      |  |  |  |  |  |
| PA0365 | 20646  | 6.84  | 31.34  | 2 | 6.85  |      |       |       |      |      |      |      |       |       |      |      |      |       |       |       |      |      |      |      |      |       |      |  |  |  |  |  |
| PA0369 | 10831  | 4.00  | 60.01  | 2 | 16.70 |      |       |       |      |      |      |      |       |       |      |      |      |       |       |       |      |      |      |      |      |       |      |  |  |  |  |  |
| PA0404 | 16856  | 5.74  | 50.35  | 2 | 26.40 |      |       |       |      |      |      |      |       |       |      |      |      |       |       |       |      |      |      |      |      |       |      |  |  |  |  |  |
| PA0405 | 21012  | 4.86  | 94.29  | 3 | 11.60 | 1.02 | 0.03  | 0.04  | 0.97 | 2107 | 1.00 | 1.01 | 0.02  | -0.03 | 0.98 | 2126 | 0.99 |       |       |       |      |      |      |      |      |       |      |  |  |  |  |  |
| PA0535 | 20887  | 5.15  | 50.53  | 2 | 8.20  | 0.98 | -0.03 | -0.20 | 0.84 | 1849 | 0.99 |      |       |       |      |      |      | 1.13  | 0.18  | 0.58  | 0.56 | 1243 | 0.97 |      |      |       |      |  |  |  |  |  |
| PA0547 | 37175  | 5.60  | 124.63 | 3 | 6.80  | 1.01 | 0.01  | -0.04 | 0.97 | 2105 | 1.00 |      |       |       |      |      |      | 1.20  | 0.26  | 0.86  | 0.39 | 903  | 0.93 |      |      |       |      |  |  |  |  |  |
| PA0572 | 105087 | 6.13  | 34.72  | 2 | 2.75  | 0.91 | -0.14 | -0.58 | 0.56 | 1234 | 0.99 |      |       |       |      |      |      |       |       |       |      |      |      |      |      |       |      |  |  |  |  |  |
| PA0575 | 144500 | 5.46  | 32.52  | 2 | 2.20  | 1.25 | 0.32  | 1.05  | 0.29 | 735  | 0.87 | 1.07 | 0.10  | 0.27  | 0.78 | 1730 | 0.98 |       |       |       |      |      |      |      |      |       |      |  |  |  |  |  |
| PA0599 | 40500  | 5.09  | 48.58  | 2 | 6.20  |      |       |       |      |      |      |      |       |       |      |      |      |       |       |       |      |      |      |      |      |       |      |  |  |  |  |  |
| PA0602 | 41261  | 6.92  | 64.96  | 2 | 12.20 | 1.37 | 0.45  | 1.50  | 0.13 | 459  | 0.63 |      |       |       |      |      |      |       |       |       |      |      |      |      |      |       |      |  |  |  |  |  |
| PA0606 | 30259  | 9.72  | 111.01 | 2 | 5.40  | 0.73 | -0.45 | -1.66 | 0.10 | 394  | 0.54 |      |       |       |      |      |      |       |       |       |      |      |      |      |      |       |      |  |  |  |  |  |
| PA0608 | 31615  | 5.05  | 193.32 | 4 | 19.58 | 0.96 | -0.06 | -0.28 | 0.78 | 1718 | 0.98 | 0.50 | -0.99 | -3.78 | 0.00 | 128  | 0.00 |       |       |       |      |      |      |      |      |       |      |  |  |  |  |  |
| PA0624 | 12994  | 4.62  | 66.53  | 2 | 25.40 |      |       |       |      |      |      |      |       |       |      |      |      |       |       |       |      |      |      |      |      |       |      |  |  |  |  |  |
| PA0657 | 57440  | 5.81  | 106.52 | 4 | 6.50  |      |       |       |      |      |      |      |       |       |      |      |      |       |       |       |      |      |      |      |      |       |      |  |  |  |  |  |
| PA0716 | 53523  | 5.15  | 65.43  | 2 | 11.30 |      |       |       |      |      |      |      |       |       |      |      |      |       |       |       |      |      |      |      |      |       |      |  |  |  |  |  |
| PA0735 | 31955  | 9.72  | 52.18  | 2 | 10.00 | 0.91 | -0.13 | -0.58 | 0.56 | 1259 | 0.97 | 0.92 | -0.12 | 0.68  | 2.43 | 0.01 | 249  | 0.13  |       |       |      |      |      |      |      |       |      |  |  |  |  |  |
| PA0793 | 43596  | 5.44  | 85.57  | 3 | 8.40  |      |       |       |      |      |      |      |       |       |      |      |      |       | 1.18  | 0.24  | 0.75 | 0.45 | 1020 | 0.96 |      |       |      |  |  |  |  |  |
| PA0801 | 57356  | 9.48  | 114.66 | 3 | 5.40  |      |       |       |      |      |      |      |       |       |      |      |      |       | 1.70  | 0.77  | 2.75 | 0.01 | 205  | 0.06 |      |       |      |  |  |  |  |  |
| PA0830 | 34677  | 9.37  | 103.11 | 2 | 15.20 |      |       |       |      |      |      |      |       |       |      |      |      |       | 1.39  | 0.47  | 1.66 | 0.10 | 431  | 0.49 |      |       |      |  |  |  |  |  |
| PA0859 | 21735  | 4.87  | 179.59 | 3 | 13.50 | 1.02 | 0.03  | 0.04  | 0.97 | 2119 | 1.00 | 1.52 | 0.61  | 2.16  | 0.03 | 294  | 0.23 |       |       |       |      |      |      |      |      |       |      |  |  |  |  |  |
| PA0864 | 29237  | 8.93  | 33.39  | 2 | 4.60  |      |       |       |      |      |      |      |       |       |      |      |      |       |       |       |      |      |      |      |      |       |      |  |  |  |  |  |
| PA0927 | 36449  | 5.74  | 154.44 | 3 | 15.80 | 1.44 | 0.53  | 1.86  | 0.06 | 371  | 0.37 |      |       |       |      |      |      |       |       |       |      |      |      |      |      |       |      |  |  |  |  |  |
| PA0948 | 16225  | 10.01 | 69.75  | 3 | 9.40  | 1.52 | 1.00  | 0.60  | ND   |      |      |      |       |       |      |      |      |       |       |       |      |      |      |      |      |       |      |  |  |  |  |  |
| PA0960 | 8150   | 4.16  | 62.86  | 2 | 60.90 | 0.97 | 0.60  | 2.04  | 0.04 | 273  | 0.33 | 0.97 | 1.00  | -0.04 | ND   |      |      |       |       |       |      |      |      |      |      |       |      |  |  |  |  |  |
| PA0965 | 19547  | 9.93  | 56.54  | 2 | 6.90  | 0.98 | -0.04 | -0.22 | 0.83 | 1816 | 0.99 |      |       |       |      | 0.98 | 1.00 | -0.03 | ND    |       |      |      |      |      |      |       |      |  |  |  |  |  |





|        |        |       |        |   |       |      |       |       |      |      |      |       |
|--------|--------|-------|--------|---|-------|------|-------|-------|------|------|------|-------|
| PA3217 | 54863  | 9.20  | 81.22  | 3 | 10.80 | 0.82 | -0.29 | -1.10 | 0.27 | 703  | 0.84 |       |
| PA3259 | 18282  | 10.43 | 56.03  | 3 | 19.50 | 0.78 | -0.35 | -1.31 | 0.19 | 561  | 0.74 |       |
| PA3301 | 36578  | 6.76  | 86.37  | 3 | 10.40 | 0.92 | -0.12 | -0.50 | 0.62 | 1356 | 0.99 |       |
| PA3304 | 32525  | 8.89  | 46.92  | 2 | 8.60  |      |       |       |      |      |      | 1.33  |
| PA3317 | 26975  | 6.64  | 57.20  | 2 | 7.25  | 1.05 | 0.07  | 0.17  | 0.86 | 1896 | 0.99 | 0.41  |
| PA3330 | 33303  | 8.84  | 88.05  | 2 | 5.10  |      |       |       |      |      |      | 1.43  |
| PA3339 | 84740  | 5.32  | 108.63 | 2 | 6.20  |      |       |       |      |      |      | 0.15  |
| PA3347 | 11697  | 5.56  | 68.00  | 3 | 12.90 | 0.54 | -0.88 | -3.15 | 0.00 | 139  | 0.03 | 0.26  |
| PA3354 | 22810  | 5.54  | 46.69  | 2 | 9.90  | 1.08 | 0.11  | 0.29  | 0.77 | 1699 | 0.99 | 0.69  |
| PA3365 | 43631  | 8.63  | 52.81  | 2 | 8.25  | 3.64 | 1.87  | 6.47  | 0.00 | 40   | 0.00 | 0.56  |
| PA3394 | 34090  | 8.98  | 41.05  | 2 | 5.10  |      |       |       |      |      |      | 0.27  |
| PA3398 | 36094  | 6.52  | 63.29  | 2 | 8.90  | 0.74 | -0.44 | -1.61 | 0.11 | 414  | 0.56 | -1.12 |
| PA3408 | 101066 | 6.08  | 32.58  | 2 | 2.95  | 1.21 | 0.27  | 0.87  | 0.38 | 900  | 0.93 | 0.26  |
| PA3433 | 33567  | 5.73  | 83.35  | 2 | 12.50 |      |       |       |      |      |      | 0.56  |
| PA3454 | 44455  | 5.30  | 35.32  | 2 | 6.90  | 1.04 | 0.05  | 0.10  | 0.92 | 1997 | 1.00 | 0.01  |
| PA3458 | 18309  | 5.59  | 85.65  | 3 | 17.80 |      |       |       |      |      |      | 2.48  |
| PA3465 | 63533  | 9.20  | 77.34  | 3 | 5.57  |      |       |       |      |      |      | 0.01  |
| PA3491 | 88036  | 6.44  | 38.90  | 2 | 5.00  |      |       |       |      |      |      | 0.26  |
| PA3495 | 26258  | 8.76  | 49.30  | 2 | 18.90 |      |       |       |      |      |      | 0.65  |
| PA3575 | 20130  | 10.15 | 57.19  | 2 | 9.10  | 0.78 | -0.35 | -1.31 | 0.19 | 560  | 0.74 | 0.52  |
| PA3580 | 18356  | 9.52  | 45.01  | 2 | 12.20 | 0.68 | -0.56 | -2.05 | 0.04 | 271  | 0.32 | 0.09  |
| PA3628 | 32508  | 5.84  | 112.22 | 3 | 13.40 |      |       |       |      |      |      | 0.09  |
| PA3658 | 107455 | 5.43  | 43.49  | 2 | 2.45  |      |       |       |      |      |      | 0.09  |
| PA3677 | 41299  | 9.46  | 63.83  | 2 | 5.70  | 1.41 | 0.50  | 1.67  | 0.10 | 391  | 0.53 | 0.26  |
| PA3680 | 29852  | 8.88  | 100.29 | 3 | 18.80 | 1.22 | 0.28  | 0.91  | 0.36 | 870  | 0.91 | 0.49  |
| PA3721 | 24521  | 5.56  | 87.64  | 3 | 16.13 |      |       |       |      |      |      | 0.54  |
| PA3758 | 39757  | 6.01  | 48.37  | 2 | 8.30  | 0.90 | -0.16 | -0.64 | 0.52 | 1149 | 0.99 | 0.31  |
| PA3767 | 21184  | 9.12  | 51.48  | 2 | 9.60  | 1.35 | 0.44  | 1.45  | 0.15 | 486  | 0.66 | 0.42  |
| PA3777 | 52780  | 10.86 | 53.27  | 2 | 12.00 | 0.96 | -0.06 | -0.29 | 0.77 | 1692 | 0.99 | 0.46  |
| PA3793 | 12642  | 4.09  | 101.72 | 2 | 27.30 |      |       |       |      |      |      | 0.89  |
| PA3846 | 20548  | 5.35  | 60.18  | 2 | 18.90 |      |       |       |      |      |      | 0.86  |
| PA3863 | 41538  | 5.29  | 100.84 | 2 | 7.05  |      |       |       |      |      |      | 0.94  |
| PA3864 | 25327  | 5.71  | 131.15 | 3 | 15.57 |      |       |       |      |      |      | 0.95  |
| PA3902 | 18283  | 6.29  | 71.59  | 3 | 22.20 | 0.82 | -0.29 | -1.10 | 0.27 | 697  | 0.84 | 0.22  |
| PA3924 | 65774  | 5.75  | 58.30  | 2 | 5.40  |      |       |       |      |      |      | 0.76  |
| PA4006 | 24455  | 5.97  | 89.95  | 3 | 18.67 | 1.07 | 0.10  | 0.26  | 0.79 | 1743 | 0.99 | 0.81  |
| PA4059 | 14413  | 10.02 | 116.01 | 3 | 26.13 |      |       |       |      |      |      | 0.89  |
| PA4110 | 45772  | 8.65  | 48.82  | 2 | 4.15  | 0.83 | -0.27 | -1.04 | 0.30 | 744  | 0.87 | 0.43  |
| PA4112 | 157306 | 5.48  | 30.11  | 2 | 3.05  | 1.52 | 0.60  | 2.04  | 0.04 | 274  | 0.33 | 0.08  |
| PA4181 | 26609  | 5.13  | 132.76 | 2 | 9.20  |      |       |       |      |      |      | 0.74  |
| PA4197 | 83704  | 6.43  | 48.72  | 2 | 2.80  | 0.89 | -0.17 | -0.67 | 0.50 | 1118 | 0.98 | 0.08  |
| PA4226 | 158247 | 5.27  | 57.21  | 2 | 3.20  |      |       |       |      |      |      | 0.44  |
| PA4242 | 5434   | 11.33 | 41.36  | 2 | 21.10 | 1.09 | 0.13  | 0.38  | 0.71 | 1561 | 0.98 | 0.07  |
| PA4281 | 46651  | 5.34  | 118.46 | 2 | 6.60  |      |       |       |      |      |      | 0.38  |
| PA4286 | 25410  | 5.37  | 101.48 | 2 | 10.40 | 1.07 | 0.09  | 0.24  | 0.81 | 1781 | 0.99 | 0.22  |
| PA4318 | 29498  | 6.53  | 134.15 | 2 | 15.50 |      |       |       |      |      |      | 0.61  |
| PA4347 | 44005  | 7.10  | 35.27  | 2 | 3.10  |      |       |       |      |      |      | 0.73  |
| PA4375 | 114923 | 5.20  | 49.14  | 2 | 2.80  | 1.07 | 0.10  | 0.25  | 0.80 | 1761 | 0.99 | 0.07  |

|      |      |       |    |      |      |       |    |      |      |       |    |      |      |      |    |      |      |      |    |      |      |       |    |      |      |      |    |      |      |       |    |      |      |      |    |      |      |       |    |      |      |      |    |      |      |       |    |      |      |      |    |      |      |       |    |      |      |       |    |      |      |       |    |      |      |       |    |      |      |       |    |      |      |       |    |      |      |       |    |      |      |      |    |      |      |      |    |      |      |      |    |      |      |      |    |      |      |       |    |      |      |      |    |      |      |       |    |      |      |      |    |      |      |      |    |      |      |       |    |      |      |       |    |      |      |       |    |      |      |      |    |      |      |      |    |      |      |       |    |      |      |       |    |      |      |      |    |      |      |       |    |      |      |       |    |      |      |      |    |      |      |      |    |      |      |      |    |      |      |      |    |      |      |       |    |      |      |       |    |      |      |      |    |
|------|------|-------|----|------|------|-------|----|------|------|-------|----|------|------|------|----|------|------|------|----|------|------|-------|----|------|------|------|----|------|------|-------|----|------|------|------|----|------|------|-------|----|------|------|------|----|------|------|-------|----|------|------|------|----|------|------|-------|----|------|------|-------|----|------|------|-------|----|------|------|-------|----|------|------|-------|----|------|------|-------|----|------|------|-------|----|------|------|------|----|------|------|------|----|------|------|------|----|------|------|------|----|------|------|-------|----|------|------|------|----|------|------|-------|----|------|------|------|----|------|------|------|----|------|------|-------|----|------|------|-------|----|------|------|-------|----|------|------|------|----|------|------|------|----|------|------|-------|----|------|------|-------|----|------|------|------|----|------|------|-------|----|------|------|-------|----|------|------|------|----|------|------|------|----|------|------|------|----|------|------|------|----|------|------|-------|----|------|------|-------|----|------|------|------|----|
| 0.82 | 1.00 | -0.29 | ND | 0.78 | 1.00 | -0.35 | ND | 0.92 | 1.00 | -0.12 | ND | 1.33 | 1.00 | 0.41 | ND | 1.05 | 1.00 | 0.07 | ND | 0.83 | 1.00 | -0.27 | ND | 1.14 | 1.00 | 0.18 | ND | 0.54 | 1.00 | -0.88 | ND | 1.62 | 1.00 | 0.69 | ND | 0.74 | 1.00 | -0.44 | ND | 1.21 | 1.00 | 0.27 | ND | 0.83 | 1.00 | -0.28 | ND | 1.04 | 1.00 | 0.05 | ND | 0.90 | 1.00 | -0.15 | ND | 0.88 | 1.00 | -0.18 | ND | 0.91 | 1.00 | -0.13 | ND | 0.93 | 1.00 | -0.10 | ND | 0.78 | 1.00 | -0.35 | ND | 0.68 | 1.00 | -0.56 | ND | 0.74 | 1.00 | -0.43 | ND | 1.03 | 1.00 | 0.04 | ND | 1.41 | 1.00 | 0.50 | ND | 1.14 | 1.00 | 0.28 | ND | 1.12 | 1.00 | 0.19 | ND | 0.90 | 1.00 | -0.16 | ND | 1.35 | 1.00 | 0.44 | ND | 0.96 | 1.00 | -0.06 | ND | 1.23 | 1.00 | 0.30 | ND | 1.18 | 1.00 | 0.24 | ND | 0.89 | 1.00 | -0.17 | ND | 0.81 | 1.00 | -0.31 | ND | 0.82 | 1.00 | -0.29 | ND | 1.18 | 1.00 | 0.24 | ND | 1.07 | 1.00 | 0.10 | ND | 0.99 | 1.00 | -0.01 | ND | 0.83 | 1.00 | -0.27 | ND | 1.52 | 1.00 | 0.60 | ND | 0.74 | 1.00 | -0.44 | ND | 0.89 | 1.00 | -0.17 | ND | 1.43 | 1.00 | 0.52 | ND | 1.09 | 1.00 | 0.13 | ND | 1.52 | 1.00 | 0.61 | ND | 1.07 | 1.00 | 0.09 | ND | 0.73 | 1.00 | -0.45 | ND | 0.93 | 1.00 | -0.10 | ND | 1.07 | 1.00 | 0.10 | ND |
|------|------|-------|----|------|------|-------|----|------|------|-------|----|------|------|------|----|------|------|------|----|------|------|-------|----|------|------|------|----|------|------|-------|----|------|------|------|----|------|------|-------|----|------|------|------|----|------|------|-------|----|------|------|------|----|------|------|-------|----|------|------|-------|----|------|------|-------|----|------|------|-------|----|------|------|-------|----|------|------|-------|----|------|------|-------|----|------|------|------|----|------|------|------|----|------|------|------|----|------|------|------|----|------|------|-------|----|------|------|------|----|------|------|-------|----|------|------|------|----|------|------|------|----|------|------|-------|----|------|------|-------|----|------|------|-------|----|------|------|------|----|------|------|------|----|------|------|-------|----|------|------|-------|----|------|------|------|----|------|------|-------|----|------|------|-------|----|------|------|------|----|------|------|------|----|------|------|------|----|------|------|------|----|------|------|-------|----|------|------|-------|----|------|------|------|----|



|        |       |      |       |   |       |  |       |       |      |      |             |             |      |      |       |    |
|--------|-------|------|-------|---|-------|--|-------|-------|------|------|-------------|-------------|------|------|-------|----|
| PAS500 | 30664 | 7.82 | 61.49 | 2 | 10.60 |  | 1.23  | 0.30  | 1.03 | 0.30 | 764         | <b>0.86</b> | 1.23 | 1.00 | 0.30  | ND |
| PAS524 | 27954 | 5.25 | 34.10 | 2 | 8.80  |  | 1.13  | 0.17  | 0.55 | 0.58 | 1303        | <b>0.97</b> | 1.13 | 1.00 | 0.17  | ND |
| PAS525 | 28449 | 5.42 | 63.67 | 2 | 4.25  |  |       |       |      |      |             |             | 0.95 | 1.00 | -0.07 | ND |
|        |       |      |       |   |       |  | -0.07 | -0.34 | 0.73 | 1614 | <b>0.99</b> |             |      |      |       |    |

**Table S3. Complete list of transcriptomic, proteomic and post-transcriptional regulation data for all *Pseudomonas aeruginosa* genes.**

| ID – Gene <sup>a</sup> | TC <sup>b</sup> | PC <sup>c</sup> | PTV <sup>d</sup> | ID – Gene <sup>a</sup> | TC <sup>b</sup> | PC <sup>c</sup> | PTV <sup>d</sup> | ID – Gene <sup>a</sup> | TC <sup>b</sup> | PC <sup>c</sup> | PTV <sup>d</sup> |
|------------------------|-----------------|-----------------|------------------|------------------------|-----------------|-----------------|------------------|------------------------|-----------------|-----------------|------------------|
| PA0001 dnaA            | 0,08            | 0,17            | 0,42             | PA1791 -               | 0,72            | 0,47            | 0,63             | PA3831 pepA            | -0,46           | -0,37           | -0,59            |
| PA0002 dnaN            | -0,14           | -0,09           | -0,11            | PA1792 -               | 0,48            | 0,24            | 0,21             | PA3832 holC            | -0,20           | -0,09           | -0,05            |
| PA0003 recF            | 0,08            | -0,22           | -0,71            | PA1793 ppiB            | 0,41            | 0,57            | 1,21             | PA3833 -               | -0,07           | ND              | ND               |
| PA0004 gyrB            | -0,20           | -0,27           | -0,56            | PA1794 glnS            | 0,59            | 0,55            | 0,99             | PA3834 valS            | -0,34           | -0,26           | -0,40            |
| PA0005 lptA            | 0,32            | -0,13           | -0,69            | PA1795 cysS            | 0,65            | 0,47            | 0,69             | PA3835 -               | -0,23           | ND              | ND               |
| PA0006 -               | -0,38           | 0,10            | 0,65             | PA1796 fold            | 0,74            | 0,62            | 1,04             | PA3836 -               | 0,12            | 0,73            | 1,94             |
| PA0007 -               | 0,40            | ND              | ND               | PA1796.1 -             | 1,84            | ND              | ND               | PA3837 -               | 0,02            | ND              | ND               |
| PA0008 glyS            | -0,24           | -0,16           | -0,21            | PA1796.2 -             | 1,68            | ND              | ND               | PA3838 -               | -0,44           | 0,49            | 1,84             |
| PA0009 glyQ            | -0,16           | -0,18           | -0,35            | PA1796.3 -             | 1,26            | ND              | ND               | PA3839 -               | -0,47           | ND              | ND               |
| PA0010 tag             | -0,29           | 0,06            | 0,47             | PA1796.4 -             | 1,35            | ND              | ND               | PA3840 -               | -0,39           | -0,33           | -0,56            |
| PA0011 -               | -0,06           | -0,02           | 0,00             | PA1797 -               | -0,22           | ND              | ND               | PA3841 exoS            | -2,56           | ND              | ND               |
| PA0012 -               | -0,15           | ND              | ND               | PA1798 parS            | 0,57            | 0,33            | 0,36             | PA3842 -               | -1,81           | -0,86           | -0,65            |
| PA0013 -               | 0,40            | ND              | ND               | PA1799 parR            | 1,18            | 0,29            | -0,34            | PA3843 -               | -2,43           | ND              | ND               |
| PA0014 -               | 0,39            | ND              | ND               | PA1800 tig             | 0,47            | 0,31            | 0,41             | PA3844 -               | -0,87           | ND              | ND               |
| PA0015 -               | -0,06           | -0,22           | -0,56            | PA1801 clpP            | 0,18            | 0,11            | 0,12             | PA3845 -               | -0,50           | ND              | ND               |
| PA0016 trkA            | -0,02           | 0,10            | 0,30             | PA1802 clpX            | 0,26            | 0,05            | -0,13            | PA3846 -               | -0,96           | ND              | ND               |
| PA0017 -               | -0,06           | 0,05            | 0,19             | PA1803 lon             | 0,10            | 0,05            | 0,05             | PA3847 -               | -0,17           | ND              | ND               |
| PA0018 fmt             | 0,12            | 0,07            | 0,08             | PA1804 hupB            | -0,17           | -0,12           | -0,17            | PA3848 -               | -0,61           | -0,30           | -0,25            |
| PA0019 def             | 0,11            | 0,04            | 0,00             | PA1804.1 -             | 0,05            | ND              | ND               | PA3849 -               | -0,40           | -0,28           | -0,40            |
| PA0020 -               | -0,85           | -0,86           | -1,60            | PA1805 ppiD            | 0,25            | 0,19            | 0,28             | PA3850 -               | -0,54           | ND              | ND               |
| PA0022 -               | -0,07           | ND              | ND               | PA1806 fabI            | 0,63            | 0,29            | 0,19             | PA3851 -               | -1,08           | ND              | ND               |
| PA0023 qor             | -0,37           | -0,36           | -0,66            | PA1807 -               | 0,58            | 0,29            | 0,24             | PA3852 -               | -0,67           | -0,07           | 0,48             |
| PA0024 hemF            | 0,17            | 0,17            | 0,30             | PA1808 -               | 0,66            | 0,65            | 1,18             | PA3853 -               | -0,14           | ND              | ND               |
| PA0025 aroE            | 0,27            | -0,02           | -0,31            | PA1809 -               | 0,75            | 0,09            | -0,50            | PA3854 -               | -0,07           | ND              | ND               |
| PA0026 plcB            | -2,00           | ND              | ND               | PA1810 -               | 0,41            | 0,35            | 0,59             | PA3855 -               | -0,31           | ND              | ND               |
| PA0027 -               | -1,67           | ND              | ND               | PA1811 -               | 0,26            | ND              | ND               | PA3856 -               | -1,29           | ND              | ND               |
| PA0028 -               | -1,79           | ND              | ND               | PA1812 mltD            | 0,35            | 0,09            | -0,10            | PA3857 pcs             | -1,00           | ND              | ND               |
| PA0031 betC            | -0,45           | ND              | ND               | PA1813 -               | -0,13           | 0,31            | 1,00             | PA3858 -               | -0,81           | ND              | ND               |
| PA0032 -               | -0,42           | ND              | ND               | PA1814 -               | 0,42            | ND              | ND               | PA3859 -               | -0,60           | -0,35           | -0,40            |
| PA0033 -               | -0,76           | ND              | ND               | PA1815 rmhA            | 0,82            | 0,30            | 0,05             | PA3860 -               | -0,74           | ND              | ND               |
| PA0034 -               | -0,07           | ND              | ND               | PA1816 dnaQ            | 0,56            | 0,12            | -0,23            | PA3861 rhl             | -0,26           | 0,02            | 0,30             |
| PA0035 trpA            | -0,87           | -0,19           | 0,33             | PA1817 -               | 0,61            | ND              | ND               | PA3862 dauB            | -0,32           | -0,04           | 0,21             |
| PA0036 trpB            | -1,06           | -0,22           | 0,43             | PA1818 ldcA            | 1,28            | 1,49            | 2,96             | PA3863 dauA            | -0,56           | ND              | ND               |
| PA0037 trpI            | -0,60           | ND              | ND               | PA1819 -               | 0,95            | ND              | ND               | PA3864 dauR            | -0,33           | ND              | ND               |
| PA0038 -               | -1,03           | ND              | ND               | PA1820 nhaB            | 0,07            | 0,02            | -0,01            | PA3865 -               | -0,39           | 0,13            | 0,77             |
| PA0039 -               | 0,67            | ND              | ND               | PA1821 -               | -0,24           | 0,06            | 0,42             | PA3866 -               | -1,42           | -0,40           | 0,27             |
| PA0040 -               | 0,04            | 0,18            | 0,49             | PA1822 fimL            | 0,09            | -0,05           | -0,24            | PA3867 -               | -0,53           | ND              | ND               |
| PA0041 -               | -0,27           | ND              | ND               | PA1823 -               | 0,08            | 0,11            | 0,24             | PA3869 -               | -0,70           | ND              | ND               |
| PA0042 -               | 0,19            | ND              | ND               | PA1824 -               | 0,67            | ND              | ND               | PA3878 narX            | 0,56            | ND              | ND               |
| PA0043 -               | -0,46           | ND              | ND               | PA1825 -               | 0,69            | -0,26           | -1,45            | PA3879 narL            | 0,18            | ND              | ND               |
| PA0044 exoT            | -2,02           | ND              | ND               | PA1826 -               | 0,55            | ND              | ND               | PA3880 -               | -0,95           | ND              | ND               |
| PA0045 -               | -0,62           | 0,04            | 0,74             | PA1828 -               | -0,32           | 0,06            | 0,49             | PA3881 -               | -1,09           | ND              | ND               |
| PA0046 -               | -0,63           | -0,02           | 0,57             | PA1829 -               | -0,33           | 0,12            | 0,68             | PA3882 -               | -0,64           | ND              | ND               |
| PA0047 -               | -0,58           | -0,07           | 0,37             | PA1830 -               | 0,12            | 0,15            | 0,31             | PA3883 -               | -0,23           | ND              | ND               |
| PA0048 -               | 0,39            | ND              | ND               | PA1831 -               | 0,04            | 0,28            | 0,74             | PA3884 -               | 0,22            | ND              | ND               |
| PA0049 -               | 2,90            | ND              | ND               | PA1832 -               | 0,28            | 0,14            | 0,11             | PA3886 -               | -0,97           | -0,28           | 0,18             |
| PA0050 -               | 0,46            | ND              | ND               | PA1833 -               | 0,44            | -0,08           | -0,65            | PA3887 nhaP            | -1,10           | -0,87           | -1,36            |
| PA0053 -               | -0,14           | ND              | ND               | PA1834 -               | 0,47            | ND              | ND               | PA3888 -               | -0,87           | ND              | ND               |
| PA0054 -               | -0,52           | ND              | ND               | PA1835 -               | -0,85           | ND              | ND               | PA3890 -               | -0,24           | ND              | ND               |
| PA0055 -               | -0,08           | -0,20           | -0,50            | PA1836 -               | 0,19            | ND              | ND               | PA3891 -               | 0,54            | ND              | ND               |
| PA0056 -               | -0,13           | ND              | ND               | PA1837 -               | 0,94            | 0,56            | 0,66             | PA3892 -               | 2,13            | 0,97            | 0,63             |
| PA0060 -               | -0,38           | ND              | ND               | PA1838 cysI            | 1,17            | 0,47            | 0,16             | PA3893 -               | 2,04            | ND              | ND               |
| PA0061 -               | -0,45           | ND              | ND               | PA1839 -               | 0,94            | ND              | ND               | PA3894 -               | 2,28            | 0,68            | -0,35            |
| PA0062 -               | 0,00            | ND              | ND               | PA1840 -               | 0,77            | ND              | ND               | PA3895 -               | 0,00            | -0,20           | -0,56            |
| PA0063 -               | -0,32           | ND              | ND               | PA1841 -               | 0,31            | 0,15            | 0,13             | PA3896 -               | -0,36           | -0,10           | 0,07             |
| PA0064 -               | -0,21           | ND              | ND               | PA1842 -               | 0,39            | ND              | ND               | PA3897 -               | -0,87           | ND              | ND               |
| PA0065 -               | 0,06            | ND              | ND               | PA1843 metH            | 0,19            | 0,14            | 0,22             | PA3898 -               | -0,30           | ND              | ND               |
| PA0066 -               | -0,09           | ND              | ND               | PA1844 -               | 0,34            | ND              | ND               | PA3899 -               | -0,53           | ND              | ND               |
| PA0067 prlC            | -0,45           | -0,15           | 0,02             | PA1845 -               | 0,42            | ND              | ND               | PA3901 fecA            | -0,44           | 1,36            | 4,31             |
| PA0068 -               | -0,32           | ND              | ND               | PA1846 cti             | 0,37            | 0,17            | 0,12             | PA3902 -               | -0,47           | ND              | ND               |
| PA0069 -               | -0,49           | ND              | ND               | PA1847 -               | -0,06           | 0,32            | 0,98             | PA3903 prfC            | -0,23           | -0,11           | -0,07            |
| PA0070 -               | 0,06            | 0,02            | 0,00             | PA1850 -               | 0,00            | ND              | ND               | PA3904 -               | -0,32           | ND              | ND               |
| PA0071 -               | 0,00            | -0,10           | -0,29            | PA1851 -               | 0,83            | ND              | ND               | PA3905 -               | -0,17           | ND              | ND               |
| PA0072 -               | 0,30            | ND              | ND               | PA1852 -               | 1,41            | -0,17           | -1,90            | PA3906 -               | -0,31           | ND              | ND               |
| PA0073 -               | 0,03            | ND              | ND               | PA1853 -               | 0,37            | ND              | ND               | PA3907 -               | -0,30           | ND              | ND               |
| PA0074 ppkA            | -0,14           | -0,12           | -0,20            | PA1854 -               | 0,36            | ND              | ND               | PA3908 -               | -0,36           | -0,30           | -0,51            |

| ID – Gene <sup>a</sup> | TC <sup>b</sup> | PC <sup>c</sup> | PTV <sup>d</sup> | ID – Gene <sup>a</sup> | TC <sup>b</sup> | PC <sup>c</sup> | PTV <sup>d</sup> | ID – Gene <sup>a</sup> | TC <sup>b</sup> | PC <sup>c</sup> | PTV <sup>d</sup> |
|------------------------|-----------------|-----------------|------------------|------------------------|-----------------|-----------------|------------------|------------------------|-----------------|-----------------|------------------|
| PA0075 pppA            | 0,27            | -0,09           | -0,54            | PA1856 -               | -0,11           | ND              | ND               | PA3911 -               | <b>1,27</b>     | ND              | ND               |
| PA0076 -               | 0,24            | -0,23           | -0,90            | PA1857 -               | 0,53            | 0,16            | -0,08            | PA3912 -               | 0,58            | ND              | ND               |
| PA0077 icmF1           | -0,05           | -0,16           | -0,40            | PA1858 str             | 0,22            | ND              | ND               | PA3913 -               | 0,08            | ND              | ND               |
| PA0078 -               | -0,05           | -0,08           | -0,17            | PA1859 -               | 0,14            | ND              | ND               | PA3916 moaE            | -0,26           | ND              | ND               |
| PA0079 -               | -0,03           | -0,24           | -0,65            | PA1861 modC            | 0,37            | ND              | ND               | PA3917 moaD            | -0,71           | ND              | ND               |
| PA0080 -               | 0,07            | 0,03            | 0,02             | PA1862 modB            | 0,69            | ND              | ND               | PA3918 moaC            | -0,66           | -0,12           | 0,32             |
| PA0081 fha1            | 0,04            | -0,56           | <b>-1,63</b>     | PA1863 modA            | 0,21            | 0,76            | <b>1,94</b>      | PA3919 -               | <b>-1,24</b>    | -0,03           | <b>1,15</b>      |
| PA0082 -               | 0,00            | -0,34           | -0,97            | PA1865 -               | 0,00            | ND              | ND               | PA3921 -               | -0,26           | ND              | ND               |
| PA0083 -               | -0,29           | -0,47           | <b>-1,06</b>     | PA1866 -               | -0,39           | ND              | ND               | PA3923 -               | <b>-1,10</b>    | ND              | ND               |
| PA0084 -               | -0,16           | -0,46           | <b>-1,14</b>     | PA1869 -               | -0,32           | ND              | ND               | PA3925 -               | 0,33            | 0,85            | <b>2,10</b>      |
| PA0085 hcp1            | -0,20           | -0,49           | <b>-1,19</b>     | PA1871 lasA            | -0,22           | ND              | ND               | PA3927 -               | <b>-1,93</b>    | ND              | ND               |
| PA0086 -               | 0,23            | -0,25           | -0,95            | PA1872 -               | -0,31           | ND              | ND               | PA3928 -               | -0,70           | ND              | ND               |
| PA0087 -               | 0,00            | ND              | ND               | PA1878 -               | 0,24            | ND              | ND               | PA3929 cioB            | <b>-1,18</b>    | ND              | ND               |
| PA0088 -               | -0,03           | -0,20           | -0,55            | PA1879 -               | 0,32            | ND              | ND               | PA3930 cioA            | <b>-2,17</b>    | ND              | ND               |
| PA0089 -               | -0,11           | ND              | ND               | PA1881 -               | 0,29            | ND              | ND               | PA3931 -               | ND              | 0,60            | ND               |
| PA0090 clpV1           | -0,08           | -0,14           | -0,32            | PA1882 -               | -0,42           | ND              | ND               | PA3933 -               | -0,63           | ND              | ND               |
| PA0091 vgrG1           | 0,03            | -0,22           | -0,64            | PA1883 -               | <b>1,87</b>     | ND              | ND               | PA3934 -               | -0,37           | -0,07           | 0,18             |
| PA0092 -               | 0,03            | 0,04            | 0,07             | PA1884 -               | -0,39           | ND              | ND               | PA3939 -               | <b>-1,46</b>    | ND              | ND               |
| PA0093 -               | 0,00            | ND              | ND               | PA1885 -               | -0,46           | ND              | ND               | PA3940 -               | -0,32           | -0,19           | -0,23            |
| PA0094 -               | -0,14           | -0,15           | -0,28            | PA1886 polB            | 0,69            | 0,17            | -0,20            | PA3941 -               | -0,32           | -0,42           | -0,87            |
| PA0095 -               | <b>-1,20</b>    | 0,14            | <b>1,58</b>      | PA1887 -               | 0,29            | ND              | ND               | PA3942 tesB            | -0,54           | -0,41           | -0,62            |
| PA0096 -               | -0,93           | ND              | ND               | PA1889 -               | 0,74            | ND              | ND               | PA3943 -               | -0,30           | ND              | ND               |
| PA0097 -               | <b>-1,17</b>    | ND              | ND               | PA1890 -               | 0,17            | 0,21            | 0,44             | PA3944 -               | -0,24           | ND              | ND               |
| PA0098 -               | <b>-1,09</b>    | ND              | ND               | PA1893 -               | <b>1,26</b>     | ND              | ND               | PA3945 -               | -0,95           | ND              | ND               |
| PA0099 -               | -0,97           | ND              | ND               | PA1894 -               | <b>1,49</b>     | ND              | ND               | PA3947 rocR            | -0,58           | ND              | ND               |
| PA0100 -               | -0,85           | -0,35           | -0,14            | PA1895 -               | <b>1,17</b>     | ND              | ND               | PA3948 rocA1           | -0,69           | -0,35           | -0,30            |
| PA0101 -               | <b>-1,00</b>    | ND              | ND               | PA1896 -               | <b>1,10</b>     | ND              | ND               | PA3949 -               | -0,26           | 0,00            | 0,26             |
| PA0102 -               | -0,22           | -0,50           | <b>-1,20</b>     | PA1897 -               | <b>1,13</b>     | ND              | ND               | PA3950 -               | -0,28           | -0,08           | 0,05             |
| PA0103 -               | -0,75           | ND              | ND               | PA1901 phzC2           | -0,13           | ND              | ND               | PA3951 -               | -0,30           | 0,02            | 0,34             |
| PA0104 -               | -0,54           | ND              | ND               | PA1906 -               | 0,49            | ND              | ND               | PA3952 -               | -0,33           | ND              | ND               |
| PA0105 coxB            | -0,66           | ND              | ND               | PA1912 femI            | <b>1,58</b>     | ND              | ND               | PA3955 -               | -0,15           | ND              | ND               |
| PA0109 -               | -0,21           | ND              | ND               | PA1913 -               | <b>1,69</b>     | 0,77            | 0,50             | PA3956 -               | <b>-1,27</b>    | ND              | ND               |
| PA0113 -               | -0,81           | ND              | ND               | PA1915 -               | 0,19            | ND              | ND               | PA3957 -               | <b>-1,00</b>    | ND              | ND               |
| PA0114 senC            | -0,58           | ND              | ND               | PA1919 nrdG            | 0,29            | ND              | ND               | PA3958 -               | -0,60           | -0,12           | 0,26             |
| PA0115 -               | -0,67           | -0,19           | 0,12             | PA1926 -               | 0,33            | 0,20            | 0,24             | PA3959 -               | <b>1,05</b>     | ND              | ND               |
| PA0116 -               | -0,27           | ND              | ND               | PA1927 metE            | 0,46            | ND              | ND               | PA3960 -               | <b>1,19</b>     | ND              | ND               |
| PA0117 -               | -0,40           | ND              | ND               | PA1928 rimJ            | 0,21            | ND              | ND               | PA3961 -               | -0,21           | -0,05           | 0,07             |
| PA0118 -               | -0,33           | 0,06            | 0,50             | PA1929 -               | 0,58            | ND              | ND               | PA3962 -               | -0,37           | ND              | ND               |
| PA0119 -               | <b>-1,17</b>    | ND              | ND               | PA1932 -               | -0,46           | ND              | ND               | PA3963 -               | -0,39           | ND              | ND               |
| PA0120 -               | 0,05            | ND              | ND               | PA1933 -               | -0,26           | ND              | ND               | PA3965 -               | -0,37           | -0,15           | -0,06            |
| PA0121 -               | -0,14           | ND              | ND               | PA1934 -               | 0,11            | ND              | ND               | PA3966 -               | -0,19           | ND              | ND               |
| PA0122 -               | -0,85           | ND              | ND               | PA1935 -               | 0,64            | ND              | ND               | PA3967 -               | -0,18           | -0,36           | -0,86            |
| PA0123 -               | -0,04           | ND              | ND               | PA1936 -               | 0,47            | ND              | ND               | PA3968 -               | -0,30           | -0,31           | -0,58            |
| PA0124 -               | -0,15           | ND              | ND               | PA1937 -               | 0,31            | ND              | ND               | PA3969 -               | -0,71           | ND              | ND               |
| PA0125 -               | 0,00            | 0,04            | 0,11             | PA1938 -               | 0,76            | ND              | ND               | PA3970 amn             | -0,92           | -0,25           | 0,21             |
| PA0126 -               | 0,02            | -0,11           | -0,34            | PA1939 -               | 0,24            | 0,19            | 0,30             | PA3971 -               | -0,24           | ND              | ND               |
| PA0127 -               | -0,75           | -0,42           | -0,44            | PA1940 -               | 0,97            | 0,39            | 0,15             | PA3972 -               | -0,50           | -0,11           | 0,19             |
| PA0128 -               | 0,35            | -0,26           | <b>-1,10</b>     | PA1941 -               | 0,75            | 0,51            | 0,71             | PA3973 -               | <b>-1,66</b>    | ND              | ND               |
| PA0129 gabP            | -0,26           | ND              | ND               | PA1942 -               | 0,00            | ND              | ND               | PA3974 ladS            | -0,26           | ND              | ND               |
| PA0130 -               | <b>-1,02</b>    | <b>1,03</b>     | <b>3,94</b>      | PA1943 -               | 0,42            | ND              | ND               | PA3975 thiD            | -0,20           | 0,00            | 0,20             |
| PA0131 -               | <b>-1,28</b>    | ND              | ND               | PA1944 -               | 0,39            | ND              | ND               | PA3976 thiE            | -0,44           | 0,00            | 0,43             |
| PA0132 -               | <b>-1,36</b>    | <b>1,41</b>     | <b>5,37</b>      | PA1946 rbsB            | -0,67           | ND              | ND               | PA3977 hemL            | -0,20           | -0,19           | -0,33            |
| PA0133 -               | -0,61           | ND              | ND               | PA1947 rbsA            | <b>1,15</b>     | ND              | ND               | PA3978 -               | -0,32           | 0,02            | 0,37             |
| PA0134 -               | -0,09           | ND              | ND               | PA1948 rbsC            | <b>1,48</b>     | ND              | ND               | PA3979 -               | 0,20            | -0,25           | -0,90            |
| PA0139 ahpC            | -0,50           | 0,22            | <b>1,11</b>      | PA1949 rbsR            | <b>1,46</b>     | 0,92            | <b>1,17</b>      | PA3980 -               | -0,14           | -0,35           | -0,87            |
| PA0140 ahpF            | 0,10            | 0,27            | 0,67             | PA1950 rbsK            | <b>1,26</b>     | 0,46            | 0,06             | PA3981 -               | -0,46           | 0,07            | 0,64             |
| PA0141 -               | 0,38            | -0,25           | <b>-1,08</b>     | PA1951 -               | <b>1,27</b>     | ND              | ND               | PA3982 -               | 0,01            | 0,24            | 0,66             |
| PA0142 -               | -0,45           | ND              | ND               | PA1957 -               | 0,55            | ND              | ND               | PA3983 -               | 0,19            | 0,29            | 0,64             |
| PA0143 nuh             | -0,34           | -0,35           | -0,66            | PA1958 -               | 0,75            | ND              | ND               | PA3984 Int             | -0,04           | -0,19           | -0,48            |
| PA0144 -               | -0,34           | ND              | ND               | PA1959 bacA            | 0,59            | ND              | ND               | PA3985 -               | -0,58           | ND              | ND               |
| PA0145 -               | -0,58           | ND              | ND               | PA1960 -               | 0,29            | ND              | ND               | PA3986 -               | -0,53           | ND              | ND               |
| PA0147 -               | <b>-1,00</b>    | ND              | ND               | PA1961 -               | 0,34            | ND              | ND               | PA3987 leuS            | -0,41           | -0,22           | -0,21            |
| PA0148 -               | -0,73           | -0,32           | -0,19            | PA1962 azoR2           | 0,65            | ND              | ND               | PA3988 -               | -0,25           | -0,36           | -0,77            |
| PA0149 -               | 0,16            | ND              | ND               | PA1963 -               | -0,29           | ND              | ND               | PA3989 holA            | -0,05           | 0,00            | 0,06             |
| PA0150 -               | 0,05            | ND              | ND               | PA1964 -               | 0,28            | 0,34            | 0,68             | PA3990 -               | 0,91            | ND              | ND               |
| PA0152 pcaQ            | -0,86           | ND              | ND               | PA1965 -               | 0,47            | ND              | ND               | PA3991 -               | -0,45           | ND              | ND               |
| PA0154 pcaG            | <b>-1,19</b>    | ND              | ND               | PA1966 -               | 0,82            | ND              | ND               | PA3992 -               | -0,73           | -0,35           | -0,27            |
| PA0155 pcaR            | -0,13           | 0,07            | 0,34             | PA1967 -               | 0,25            | ND              | ND               | PA3993 -               | -0,19           | ND              | ND               |
| PA0156 -               | -0,03           | 0,00            | 0,02             | PA1968 -               | 0,28            | ND              | ND               | PA3995 -               | -0,29           | ND              | ND               |
| PA0157 -               | -0,25           | -0,21           | -0,35            | PA1969 -               | 0,22            | 0,18            | 0,31             | PA3996 lis             | 0,06            | -0,13           | -0,42            |
| PA0158 -               | -0,34           | 0,02            | 0,40             | PA1970 -               | 0,29            | ND              | ND               | PA3997 lipB            | 0,16            | -0,10           | -0,45            |
| PA0159 -               | -0,21           | ND              | ND               | PA1971 braZ            | -0,68           | ND              | ND               | PA3998 -               | -0,12           | 0,04            | 0,23             |
| PA0160 -               | <b>1,39</b>     | ND              | ND               | PA1973 pqgF            | -0,32           | ND              | ND               | PA3999 dacC            | -0,08           | -0,15           | -0,34            |
| PA0161 -               | <b>1,59</b>     | ND              | ND               | PA1978 erbR            | <b>-2,46</b>    | ND              | ND               | PA4000 -               | -0,02           | -0,04           | -0,11            |
| PA0162 opdC            | 0,53            | 0,24            | 0,14             | PA1984 exaC            | <b>1,92</b>     | ND              | ND               | PA4001 sltB1           | 0,11            | -0,03           | -0,19            |
| PA0163 -               | -0,21           | ND              | ND               | PA1985 pqgA            | <b>-2,35</b>    | ND              | ND               | PA4002 rodA            | -0,05           | ND              | ND               |

| ID – Gene <sup>a</sup> | TC <sup>b</sup> | PC <sup>c</sup> | PTV <sup>d</sup> | ID – Gene <sup>a</sup> | TC <sup>b</sup> | PC <sup>c</sup> | PTV <sup>d</sup> | ID – Gene <sup>a</sup> | TC <sup>b</sup> | PC <sup>c</sup> | PTV <sup>d</sup> |
|------------------------|-----------------|-----------------|------------------|------------------------|-----------------|-----------------|------------------|------------------------|-----------------|-----------------|------------------|
| PA0164 -               | -1,98           | ND              | ND               | PA1986 pqqB            | -2,00           | ND              | ND               | PA4003 pbpA            | -0,23           | -0,20           | -0,34            |
| PA0165 -               | -0,48           | -0,27           | -0,29            | PA1987 pqqC            | -1,70           | ND              | ND               | PA4004 -               | -0,23           | -0,13           | -0,13            |
| PA0167 -               | -1,05           | -0,05           | 0,91             | PA1988 pqqD            | -1,39           | ND              | ND               | PA4005 -               | -0,25           | -0,02           | 0,20             |
| PA0168 -               | -0,40           | ND              | ND               | PA1989 pqqE            | -1,00           | ND              | ND               | PA4006 nadD            | -0,20           | ND              | ND               |
| PA0169 -               | 1,27            | 1,05            | 1,72             | PA1991 -               | 0,44            | ND              | ND               | PA4007 proA            | -0,20           | -0,23           | -0,46            |
| PA0170 -               | 1,39            | 0,96            | 1,33             | PA1992 ercS            | 1,24            | ND              | ND               | PA4009 -               | -0,46           | ND              | ND               |
| PA0171 -               | 1,50            | 1,44            | 2,60             | PA1993 -               | 1,13            | ND              | ND               | PA4010 -               | 0,08            | -0,04           | -0,20            |
| PA0172 -               | 1,06            | ND              | ND               | PA1994 -               | 0,22            | ND              | ND               | PA4011 -               | -0,19           | 0,13            | 0,56             |
| PA0179 -               | -1,05           | ND              | ND               | PA1995 -               | 0,49            | ND              | ND               | PA4012 -               | -0,33           | ND              | ND               |
| PA0180 cttP            | -0,34           | ND              | ND               | PA1996 ppiC1           | 0,73            | ND              | ND               | PA4013 -               | -0,46           | ND              | ND               |
| PA0181 -               | -0,86           | ND              | ND               | PA1997 -               | 0,07            | ND              | ND               | PA4014 -               | -0,38           | ND              | ND               |
| PA0182 -               | -0,35           | ND              | ND               | PA1998 dhcR            | -0,93           | 0,16            | 1,39             | PA4015 -               | -0,87           | -0,11           | 0,54             |
| PA0183 atsA            | -0,46           | ND              | ND               | PA1999 dhcA            | 4,29            | 2,37            | 2,46             | PA4016 -               | -0,56           | ND              | ND               |
| PA0195 pntAA           | 1,53            | 0,53            | -0,03            | PA2000 dhcB            | 4,07            | 1,99            | 1,61             | PA4017 -               | -0,37           | -0,24           | -0,33            |
| PA0195.1 pntAB         | 0,46            | ND              | ND               | PA2001 atoB            | 3,42            | 2,44            | 3,51             | PA4018 -               | -0,38           | ND              | ND               |
| PA0196 pntB            | 1,27            | ND              | ND               | PA2002 -               | 3,70            | 2,84            | 4,37             | PA4019 -               | -0,43           | -0,10           | 0,13             |
| PA0199 exbD1           | -0,35           | ND              | ND               | PA2003 bdhA            | 2,44            | ND              | ND               | PA4020 mpl             | -0,39           | -0,14           | -0,02            |
| PA0200 -               | -2,34           | ND              | ND               | PA2004 -               | 1,14            | ND              | ND               | PA4021 -               | -0,19           | ND              | ND               |
| PA0201 -               | -0,52           | ND              | ND               | PA2005 -               | 1,16            | ND              | ND               | PA4022 -               | 2,04            | 2,12            | 3,99             |
| PA0202 -               | 0,65            | ND              | ND               | PA2006 -               | 3,33            | ND              | ND               | PA4023 -               | 1,19            | ND              | ND               |
| PA0203 -               | 1,87            | ND              | ND               | PA2007 maiA            | 3,66            | 1,86            | 1,62             | PA4024 eutB            | 1,22            | ND              | ND               |
| PA0205 -               | -0,29           | ND              | ND               | PA2008 fahA            | 3,24            | 2,58            | 4,09             | PA4025 -               | 0,92            | ND              | ND               |
| PA0206 -               | 0,64            | ND              | ND               | PA2009 hmgA            | 3,36            | 1,68            | 1,43             | PA4026 -               | -1,02           | -0,35           | 0,02             |
| PA0207 -               | -0,79           | ND              | ND               | PA2010 -               | 1,20            | 0,50            | 0,21             | PA4027 -               | -0,35           | ND              | ND               |
| PA0208 mdcA            | -0,58           | ND              | ND               | PA2011 liuE            | 1,87            | 0,59            | -0,19            | PA4029 -               | -0,06           | 0,04            | 0,17             |
| PA0209 -               | 2,46            | ND              | ND               | PA2012 liuD            | 2,21            | 0,98            | 0,58             | PA4030 -               | -0,28           | ND              | ND               |
| PA0210 mdcC            | 2,81            | ND              | ND               | PA2013 liuC            | 2,27            | 1,76            | 2,74             | PA4031 ppa             | -0,31           | -0,38           | -0,77            |
| PA0211 mdcD            | 1,68            | ND              | ND               | PA2014 liuB            | 2,37            | 1,32            | 1,39             | PA4032 -               | 0,27            | 0,19            | 0,26             |
| PA0212 mdcE            | 1,49            | ND              | ND               | PA2015 liuA            | 2,16            | 2,06            | 3,69             | PA4033 -               | -1,38           | ND              | ND               |
| PA0213 -               | 1,22            | ND              | ND               | PA2016 liuR            | 0,52            | 0,66            | 1,35             | PA4034 aqpZ            | -1,26           | ND              | ND               |
| PA0214 -               | 0,24            | ND              | ND               | PA2017 -               | 0,46            | ND              | ND               | PA4035 -               | -0,85           | -0,30           | -0,01            |
| PA0215 -               | -0,66           | ND              | ND               | PA2018 -               | -0,60           | 0,04            | 0,71             | PA4036 -               | -0,24           | ND              | ND               |
| PA0216 -               | 0,89            | ND              | ND               | PA2019 -               | -0,66           | -0,10           | 0,37             | PA4042 xseB            | -0,45           | -0,37           | -0,61            |
| PA0217 -               | -0,72           | ND              | ND               | PA2020 -               | 0,18            | 0,16            | 0,29             | PA4043 ispA            | -0,48           | -0,35           | -0,52            |
| PA0218 -               | -0,88           | ND              | ND               | PA2021 -               | -0,53           | ND              | ND               | PA4044 dxs             | -0,26           | -0,23           | -0,41            |
| PA0223 -               | -0,42           | ND              | ND               | PA2022 -               | 0,87            | ND              | ND               | PA4045 -               | -0,35           | ND              | ND               |
| PA0224 -               | -0,13           | ND              | ND               | PA2023 galU            | 0,72            | 0,20            | -0,15            | PA4046 -               | -0,20           | ND              | ND               |
| PA0225 -               | -0,57           | ND              | ND               | PA2024 -               | 0,22            | ND              | ND               | PA4047 ribA            | -0,24           | -0,10           | -0,06            |
| PA0226 -               | 0,00            | ND              | ND               | PA2025 gor             | -0,14           | 0,01            | 0,16             | PA4048 -               | -0,60           | ND              | ND               |
| PA0230 pcaB            | -0,63           | ND              | ND               | PA2026 -               | -2,64           | ND              | ND               | PA4049 -               | 0,00            | ND              | ND               |
| PA0231 pcaD            | -0,66           | ND              | ND               | PA2028 -               | 0,17            | ND              | ND               | PA4050 pgpA            | 0,20            | ND              | ND               |
| PA0232 pcaC            | -0,37           | ND              | ND               | PA2029 -               | -0,21           | ND              | ND               | PA4051 thiL            | -0,02           | -0,04           | -0,09            |
| PA0233 -               | -0,87           | ND              | ND               | PA2030 -               | 0,30            | ND              | ND               | PA4052 nusB            | -0,13           | 0,04            | 0,24             |
| PA0234 -               | 0,53            | ND              | ND               | PA2031 -               | 0,28            | ND              | ND               | PA4053 ribE            | 0,00            | -0,11           | -0,30            |
| PA0236 -               | 0,21            | -0,07           | -0,42            | PA2032 -               | 0,57            | ND              | ND               | PA4054 ribB            | 0,52            | -0,03           | -0,60            |
| PA0239 -               | -0,21           | ND              | ND               | PA2037 -               | 0,52            | ND              | ND               | PA4055 ribC            | 0,54            | 0,15            | -0,11            |
| PA0243 -               | -0,28           | ND              | ND               | PA2038 -               | 0,77            | ND              | ND               | PA4056 ribD            | -0,48           | -0,13           | 0,11             |
| PA0245 aroQ2           | -0,46           | ND              | ND               | PA2039 -               | 0,50            | ND              | ND               | PA4057 nrdR            | -0,44           | -0,30           | -0,41            |
| PA0246 -               | -0,43           | ND              | ND               | PA2040 -               | -1,00           | 0,16            | 1,47             | PA4058 -               | 0,03            | 0,01            | 0,01             |
| PA0248 -               | -0,79           | ND              | ND               | PA2041 -               | -0,78           | ND              | ND               | PA4059 -               | -0,19           | ND              | ND               |
| PA0249 -               | 0,10            | ND              | ND               | PA2042 -               | 0,30            | 0,07            | -0,09            | PA4060 -               | 0,09            | -0,02           | -0,14            |
| PA0250 -               | -0,77           | -0,09           | 0,52             | PA2043 -               | -0,09           | ND              | ND               | PA4061 -               | -0,35           | -0,32           | -0,56            |
| PA0252 -               | 0,08            | ND              | ND               | PA2044 -               | -0,01           | 0,18            | 0,52             | PA4062 -               | -0,83           | ND              | ND               |
| PA0253 -               | -0,20           | ND              | ND               | PA2045 -               | 0,52            | ND              | ND               | PA4063 -               | 0,00            | ND              | ND               |
| PA0254 -               | -0,24           | ND              | ND               | PA2047 -               | 0,00            | ND              | ND               | PA4064 -               | -1,19           | ND              | ND               |
| PA0255 -               | -0,31           | ND              | ND               | PA2048 -               | 2,32            | ND              | ND               | PA4065 -               | -0,63           | ND              | ND               |
| PA0256 -               | -1,00           | ND              | ND               | PA2049 -               | 0,31            | ND              | ND               | PA4066 -               | -0,40           | ND              | ND               |
| PA0257 -               | -0,50           | ND              | ND               | PA2052 cynS            | 0,29            | ND              | ND               | PA4067 oprG            | 0,60            | -0,57           | -2,24            |
| PA0258 -               | -0,84           | ND              | ND               | PA2054 cynR            | -0,35           | ND              | ND               | PA4068 -               | -0,31           | -0,37           | -0,73            |
| PA0259 -               | -0,60           | ND              | ND               | PA2056 -               | -0,29           | ND              | ND               | PA4069 -               | -0,68           | -0,15           | 0,25             |
| PA0260 -               | -0,39           | ND              | ND               | PA2063 -               | 0,74            | ND              | ND               | PA4070 -               | -1,14           | ND              | ND               |
| PA0261 -               | -0,33           | ND              | ND               | PA2064 pcoB            | 0,69            | ND              | ND               | PA4074 -               | -0,74           | ND              | ND               |
| PA0262 -               | -0,58           | 0,52            | 2,08             | PA2071 fusA2           | 0,00            | 0,05            | 0,14             | PA4075 -               | -0,72           | ND              | ND               |
| PA0263 hcpC            | -0,87           | ND              | ND               | PA2076 -               | 0,32            | -0,02           | -0,38            | PA4076 -               | -0,09           | ND              | ND               |
| PA0263.1 -             | 0,59            | ND              | ND               | PA2077 -               | 0,87            | ND              | ND               | PA4077 -               | -0,34           | ND              | ND               |
| PA0264 -               | -1,33           | ND              | ND               | PA2079 -               | 0,82            | ND              | ND               | PA4079 -               | -0,65           | -0,11           | 0,33             |
| PA0265 gabD            | -1,44           | -0,18           | 0,92             | PA2080 kynU            | 0,48            | 0,54            | 1,05             | PA4080 -               | -0,63           | ND              | ND               |
| PA0266 gabT            | -1,69           | -0,21           | 1,10             | PA2081 kynB            | 0,31            | 0,46            | 1,00             | PA4086 cupB1           | 0,13            | ND              | ND               |
| PA0267 -               | -0,33           | ND              | ND               | PA2082 -               | 0,03            | ND              | ND               | PA4090 -               | -1,08           | ND              | ND               |
| PA0268 -               | -0,36           | ND              | ND               | PA2083 -               | 0,13            | ND              | ND               | PA4094 -               | -0,71           | ND              | ND               |
| PA0269 -               | -0,92           | 0,14            | 1,31             | PA2097 -               | 1,46            | ND              | ND               | PA4101 bfmR            | -1,00           | ND              | ND               |
| PA0270 -               | -0,74           | ND              | ND               | PA2100 -               | -0,05           | -0,06           | -0,12            | PA4108 -               | -2,38           | ND              | ND               |
| PA0271 -               | 0,06            | ND              | ND               | PA2101 -               | -0,09           | ND              | ND               | PA4109 ampR            | -0,20           | ND              | ND               |
| PA0272 -               | -0,61           | ND              | ND               | PA2102 -               | 0,26            | ND              | ND               | PA4111 -               | -1,32           | ND              | ND               |
| PA0275 -               | -1,55           | ND              | ND               | PA2103 -               | 0,00            | ND              | ND               | PA4112 -               | 0,00            | ND              | ND               |
| PA0276 -               | -0,24           | ND              | ND               | PA2104 -               | 0,22            | ND              | ND               | PA4113 -               | -0,11           | ND              | ND               |

| ID – Gene <sup>a</sup> | TC <sup>b</sup> | PC <sup>c</sup> | PTV <sup>d</sup> | ID – Gene <sup>a</sup> | TC <sup>b</sup> | PC <sup>c</sup> | PTV <sup>d</sup> | ID – Gene <sup>a</sup> | TC <sup>b</sup> | PC <sup>c</sup> | PTV <sup>d</sup> |
|------------------------|-----------------|-----------------|------------------|------------------------|-----------------|-----------------|------------------|------------------------|-----------------|-----------------|------------------|
| PA0277 -               | 0,45            | -0,04           | -0,58            | PA2105 -               | 0,31            | ND              | ND               | PA4114 -               | -0,73           | ND              | ND               |
| PA0279 -               | -0,52           | ND              | ND               | PA2106 -               | 0,22            | ND              | ND               | PA4115 -               | <b>-1,51</b>    | -0,61           | -0,23            |
| PA0280 cysA            | 0,68            | 0,08            | -0,45            | PA2108 -               | <b>3,62</b>     | ND              | ND               | PA4116 bphO            | -0,73           | ND              | ND               |
| PA0281 cysW            | 0,31            | ND              | ND               | PA2109 -               | <b>7,76</b>     | ND              | ND               | PA4117 bphP            | -0,60           | ND              | ND               |
| PA0282 cysT            | 0,10            | ND              | ND               | PA2110 -               | <b>8,59</b>     | <b>2,78</b>     | -0,67            | PA4118 -               | -0,43           | ND              | ND               |
| PA0283 sbp             | 0,31            | ND              | ND               | PA2111 -               | <b>8,65</b>     | <b>2,80</b>     | -0,69            | PA4119 aph             | -0,64           | ND              | ND               |
| PA0284 -               | 0,42            | ND              | ND               | PA2112 -               | <b>8,45</b>     | <b>2,74</b>     | -0,66            | PA4124 hpcB            | <b>-1,14</b>    | ND              | ND               |
| PA0285 -               | -0,57           | 0,00            | 0,55             | PA2113 opdO            | <b>7,97</b>     | <b>3,03</b>     | 0,65             | PA4129 -               | -0,13           | ND              | ND               |
| PA0286 desA            | -0,10           | ND              | ND               | PA2114 -               | <b>5,92</b>     | <b>2,13</b>     | 0,13             | PA4130 -               | -0,65           | ND              | ND               |
| PA0289 gpuR            | -0,82           | ND              | ND               | PA2115 -               | <b>2,78</b>     | 0,70            | -0,80            | PA4132 -               | -0,94           | ND              | ND               |
| PA0290 -               | -0,79           | ND              | ND               | PA2116 -               | <b>5,32</b>     | <b>2,19</b>     | 0,92             | PA4133 -               | 0,76            | ND              | ND               |
| PA0291 oprE            | -0,13           | 0,28            | 0,95             | PA2117 -               | <b>3,94</b>     | ND              | ND               | PA4134 -               | -0,07           | ND              | ND               |
| PA0292 aguA            | -0,17           | -0,25           | -0,54            | PA2118 ada             | <b>1,55</b>     | ND              | ND               | PA4135 -               | -0,05           | -0,08           | -0,19            |
| PA0293 aguB            | 0,17            | 0,25            | 0,54             | PA2119 -               | 0,10            | 0,11            | 0,23             | PA4136 -               | -0,24           | ND              | ND               |
| PA0294 aguR            | -0,19           | ND              | ND               | PA2121 -               | -0,87           | ND              | ND               | PA4137 -               | 0,46            | ND              | ND               |
| PA0295 -               | <b>-1,09</b>    | -0,35           | 0,09             | PA2123 -               | 0,13            | ND              | ND               | PA4138 tyrS            | 0,24            | -0,08           | -0,46            |
| PA0296 spul            | -0,61           | -0,04           | 0,49             | PA2125 -               | <b>2,46</b>     | ND              | ND               | PA4139 -               | -0,36           | ND              | ND               |
| PA0297 spuA            | -0,39           | 0,60            | <b>2,11</b>      | PA2126 -               | <b>3,60</b>     | ND              | ND               | PA4141 -               | <b>-1,04</b>    | ND              | ND               |
| PA0298 spuB            | -0,51           | 0,53            | <b>2,01</b>      | PA2127 -               | <b>1,54</b>     | ND              | ND               | PA4145 -               | -0,91           | ND              | ND               |
| PA0299 spuC            | -0,57           | 0,31            | <b>1,46</b>      | PA2128 cupA1           | <b>4,01</b>     | ND              | ND               | PA4146 -               | -0,87           | ND              | ND               |
| PA0300 spuD            | -0,02           | 0,49            | <b>1,40</b>      | PA2129 cupA2           | <b>5,04</b>     | ND              | ND               | PA4147 acoR            | 0,45            | ND              | ND               |
| PA0301 spuE            | -0,40           | -0,63           | <b>-1,38</b>     | PA2130 cupA3           | <b>3,17</b>     | ND              | ND               | PA4149 -               | -0,78           | ND              | ND               |
| PA0302 spuF            | -0,50           | 0,12            | 0,84             | PA2131 cupA4           | <b>3,58</b>     | ND              | ND               | PA4150 -               | <b>-1,14</b>    | ND              | ND               |
| PA0303 spuG            | -0,42           | ND              | ND               | PA2166 -               | -0,87           | ND              | ND               | PA4154 -               | -0,34           | 0,15            | 0,77             |
| PA0304 spuH            | -0,30           | ND              | ND               | PA2182 -               | <b>1,87</b>     | ND              | ND               | PA4157 -               | 0,14            | ND              | ND               |
| PA0305 -               | -0,58           | -0,17           | 0,11             | PA2191 exoY            | <b>-1,17</b>    | ND              | ND               | PA4158 fepC            | -0,24           | ND              | ND               |
| PA0306 -               | -0,62           | ND              | ND               | PA2193 hcnA            | 0,83            | ND              | ND               | PA4162 -               | -0,87           | ND              | ND               |
| PA0307 -               | -0,17           | ND              | ND               | PA2194 hcnB            | <b>1,11</b>     | ND              | ND               | PA4163 -               | -0,25           | -0,16           | -0,19            |
| PA0308 -               | -0,28           | 0,14            | 0,67             | PA2195 hcnC            | <b>1,39</b>     | -0,75           | <b>-3,52</b>     | PA4164 -               | -0,36           | ND              | ND               |
| PA0309 -               | 0,13            | -0,12           | -0,47            | PA2196 -               | 0,34            | ND              | ND               | PA4165 -               | -0,68           | ND              | ND               |
| PA0310 -               | -0,80           | ND              | ND               | PA2197 -               | -0,26           | -0,21           | -0,34            | PA4166 -               | <b>-1,46</b>    | ND              | ND               |
| PA0311 -               | -0,54           | ND              | ND               | PA2198 -               | -0,24           | -0,02           | 0,19             | PA4168 fpvB            | <b>-1,00</b>    | ND              | ND               |
| PA0312 -               | -0,59           | ND              | ND               | PA2199 -               | -0,21           | -0,32           | -0,71            | PA4169 -               | -0,37           | ND              | ND               |
| PA0313 -               | -0,22           | ND              | ND               | PA2200 -               | 0,00            | ND              | ND               | PA4170 -               | -0,78           | ND              | ND               |
| PA0314 -               | -0,04           | 0,24            | 0,71             | PA2201 -               | -0,11           | ND              | ND               | PA4174 -               | -0,71           | ND              | ND               |
| PA0315 -               | <b>-1,06</b>    | -0,11           | 0,76             | PA2202 -               | <b>1,37</b>     | ND              | ND               | PA4175 piv             | <b>-1,53</b>    | ND              | ND               |
| PA0316 serA            | 0,11            | 0,09            | 0,13             | PA2203 -               | <b>2,81</b>     | ND              | ND               | PA4176 ppiC2           | <b>-1,05</b>    | -0,44           | -0,20            |
| PA0317 -               | -0,20           | -0,02           | 0,13             | PA2204 -               | <b>2,01</b>     | <b>1,33</b>     | <b>1,77</b>      | PA4178 -               | -0,21           | ND              | ND               |
| PA0318 -               | -0,68           | -0,44           | -0,59            | PA2205 -               | 0,39            | ND              | ND               | PA4179 -               | <b>-3,97</b>    | <b>-1,73</b>    | -0,96            |
| PA0319 -               | -0,19           | 0,10            | 0,47             | PA2206 -               | 0,00            | ND              | ND               | PA4180 -               | <b>-1,18</b>    | -0,11           | 0,85             |
| PA0320 -               | -0,12           | ND              | ND               | PA2218 -               | 0,42            | ND              | ND               | PA4181 -               | -0,74           | ND              | ND               |
| PA0327 -               | <b>-1,44</b>    | ND              | ND               | PA2220 -               | -0,08           | ND              | ND               | PA4182 -               | -0,34           | ND              | ND               |
| PA0328 -               | <b>-2,15</b>    | -0,40           | <b>1,01</b>      | PA2222 -               | 0,08            | ND              | ND               | PA4183 -               | -0,36           | ND              | ND               |
| PA0329 -               | -0,08           | -0,21           | -0,51            | PA2223 -               | 0,67            | ND              | ND               | PA4184 -               | 0,21            | ND              | ND               |
| PA0330 rpiA            | -0,09           | 0,11            | 0,41             | PA2224 -               | 0,89            | ND              | ND               | PA4185 -               | -0,34           | ND              | ND               |
| PA0331 ilvA1           | -0,19           | -0,04           | 0,07             | PA2225 -               | <b>1,38</b>     | ND              | ND               | PA4186 -               | -0,58           | ND              | ND               |
| PA0332 -               | -0,31           | ND              | ND               | PA2226 -               | 0,37            | ND              | ND               | PA4190 pqsL            | -0,66           | -0,20           | 0,08             |
| PA0333 -               | -0,13           | 0,04            | 0,24             | PA2227 vqsM            | 0,70            | ND              | ND               | PA4191 -               | -0,64           | ND              | ND               |
| PA0334 -               | -0,55           | ND              | ND               | PA2228 -               | <b>1,14</b>     | ND              | ND               | PA4195 -               | -0,42           | ND              | ND               |
| PA0335 -               | <b>-1,19</b>    | -0,14           | 0,78             | PA2229 -               | 0,05            | 0,29            | 0,76             | PA4196 bfiR            | 0,16            | ND              | ND               |
| PA0336 ygdP            | -0,27           | ND              | ND               | PA2230 -               | 0,72            | ND              | ND               | PA4197 bfiS            | -0,35           | ND              | ND               |
| PA0337 ptsP            | -0,10           | 0,01            | 0,14             | PA2231 pslA            | <b>1,56</b>     | <b>1,16</b>     | <b>1,74</b>      | PA4198 -               | -0,83           | 0,88            | <b>3,32</b>      |
| PA0338 -               | -0,07           | ND              | ND               | PA2232 pslB            | <b>1,82</b>     | 0,88            | 0,68             | PA4199 -               | -0,69           | -0,08           | 0,47             |
| PA0339 -               | -0,91           | ND              | ND               | PA2233 pslC            | <b>1,81</b>     | 0,73            | 0,27             | PA4200 -               | -0,20           | -0,34           | -0,76            |
| PA0340 -               | 0,00            | ND              | ND               | PA2234 pslD            | <b>2,03</b>     | <b>1,44</b>     | <b>2,06</b>      | PA4201 ddlA            | -0,86           | -0,21           | 0,27             |
| PA0341 lgt             | -0,01           | -0,07           | -0,18            | PA2235 pslE            | <b>1,93</b>     | <b>1,20</b>     | <b>1,49</b>      | PA4202 -               | -0,53           | -0,13           | 0,17             |
| PA0342 thyA            | -0,02           | -0,09           | -0,23            | PA2236 pslF            | <b>2,03</b>     | <b>1,08</b>     | <b>1,05</b>      | PA4203 -               | -0,36           | ND              | ND               |
| PA0343 -               | -0,06           | ND              | ND               | PA2237 pslG            | <b>2,14</b>     | <b>1,10</b>     | 0,98             | PA4204 ppgL            | -0,45           | ND              | ND               |
| PA0344 -               | -0,69           | ND              | ND               | PA2238 pslH            | <b>2,19</b>     | <b>1,23</b>     | <b>1,30</b>      | PA4205 mexG            | 0,84            | ND              | ND               |
| PA0345 -               | -0,81           | -0,12           | 0,46             | PA2239 pslI            | <b>2,38</b>     | 0,76            | -0,22            | PA4206 mexH            | <b>1,12</b>     | ND              | ND               |
| PA0346 -               | 0,07            | ND              | ND               | PA2240 pslJ            | <b>2,29</b>     | ND              | ND               | PA4207 mexI            | 0,46            | ND              | ND               |
| PA0347 glpQ            | 0,28            | ND              | ND               | PA2241 pslK            | <b>2,22</b>     | 0,40            | <b>-1,08</b>     | PA4212 phzC1           | 0,13            | ND              | ND               |
| PA0350 folA            | 0,06            | -0,23           | -0,72            | PA2242 pslL            | <b>2,09</b>     | <b>1,42</b>     | <b>1,94</b>      | PA4217 phzS            | <b>-1,46</b>    | ND              | ND               |
| PA0351 -               | -0,63           | ND              | ND               | PA2244 pslN            | -0,24           | ND              | ND               | PA4227 pchR            | 0,11            | ND              | ND               |
| PA0352 -               | 0,15            | ND              | ND               | PA2245 pslO            | 0,52            | ND              | ND               | PA4232 ssb             | -0,58           | -0,50           | -0,84            |
| PA0353 ilvD            | -0,51           | -0,44           | -0,75            | PA2246 bkdR            | -0,97           | ND              | ND               | PA4233 -               | -0,06           | -0,07           | -0,12            |
| PA0354 -               | -0,22           | -0,07           | 0,02             | PA2247 bkdA1           | <b>3,61</b>     | <b>1,96</b>     | <b>1,97</b>      | PA4234 uvrA            | -0,34           | -0,30           | -0,52            |
| PA0356 -               | 0,06            | -0,04           | -0,17            | PA2248 bkdA2           | <b>3,98</b>     | <b>2,79</b>     | <b>3,97</b>      | PA4235 bfrA            | -0,56           | 0,01            | 0,59             |
| PA0357 mutM            | -0,05           | -0,18           | -0,45            | PA2249 bkdB            | <b>3,99</b>     | <b>2,17</b>     | <b>2,18</b>      | PA4236 katA            | -0,19           | -0,20           | -0,37            |
| PA0358 -               | <b>1,20</b>     | 0,60            | 0,50             | PA2250 lpdV            | <b>4,12</b>     | <b>2,35</b>     | <b>2,57</b>      | PA4237 rplQ            | -0,26           | -0,11           | -0,05            |
| PA0359 -               | <b>-1,53</b>    | ND              | ND               | PA2251 -               | 0,62            | ND              | ND               | PA4238 rpoA            | -0,23           | -0,17           | -0,24            |
| PA0360 -               | -0,58           | ND              | ND               | PA2252 -               | <b>-3,32</b>    | 0,89            | <b>5,85</b>      | PA4239 rpsD            | -0,28           | -0,08           | 0,06             |
| PA0361 -               | -0,25           | ND              | ND               | PA2253 ansA            | <b>-2,19</b>    | 0,31            | <b>3,07</b>      | PA4240 rpsK            | -0,25           | -0,05           | 0,11             |
| PA0362 fdx1            | -0,01           | ND              | ND               | PA2258 ptxR            | <b>-1,00</b>    | ND              | ND               | PA4241 rpsM            | -0,15           | -0,04           | 0,03             |
| PA0363 coaD            | -0,17           | -0,19           | -0,36            | PA2259 ptxS            | -0,31           | ND              | ND               | PA4242 rpmJ            | -0,19           | ND              | ND               |
| PA0364 -               | 0,00            | ND              | ND               | PA2264 -               | 0,24            | -0,12           | -0,58            | PA4243 secY            | -0,19           | -0,04           | 0,09             |

| ID – Gene <sup>a</sup> | TC <sup>b</sup> | PC <sup>c</sup> | PTV <sup>d</sup> | ID – Gene <sup>a</sup> | TC <sup>b</sup> | PC <sup>c</sup> | PTV <sup>d</sup> | ID – Gene <sup>a</sup> | TC <sup>b</sup> | PC <sup>c</sup> | PTV <sup>d</sup> |
|------------------------|-----------------|-----------------|------------------|------------------------|-----------------|-----------------|------------------|------------------------|-----------------|-----------------|------------------|
| PA0365 -               | 0,18            | ND              | ND               | PA2265 -               | 0,21            | 0,07            | -0,01            | PA4244 rplO            | -0,44           | -0,10           | 0,17             |
| PA0366 -               | <b>-1,28</b>    | -0,10           | 0,99             | PA2266 -               | 0,37            | 0,00            | -0,37            | PA4245 rpmD            | -0,31           | -0,13           | -0,07            |
| PA0367 -               | -0,57           | ND              | ND               | PA2267 -               | 0,04            | ND              | ND               | PA4246 rpsE            | -0,32           | -0,10           | 0,04             |
| PA0368 -               | -0,30           | ND              | ND               | PA2268 -               | -0,13           | ND              | ND               | PA4247 rplR            | -0,31           | -0,11           | -0,01            |
| PA0369 -               | 0,08            | ND              | ND               | PA2269 -               | -0,22           | ND              | ND               | PA4248 rplF            | -0,34           | -0,03           | 0,25             |
| PA0370 -               | -0,05           | -0,23           | -0,62            | PA2270 -               | 0,21            | ND              | ND               | PA4249 rpsH            | -0,09           | -0,09           | -0,16            |
| PA0371 -               | 0,02            | -0,04           | -0,13            | PA2271 -               | -0,19           | ND              | ND               | PA4250 rpsN            | -0,20           | -0,07           | 0,01             |
| PA0372 -               | -0,06           | -0,05           | -0,09            | PA2272 pbpC            | 0,43            | ND              | ND               | PA4251 rplE            | -0,27           | -0,08           | 0,04             |
| PA0373 ftsY            | 0,04            | 0,14            | 0,36             | PA2273 soxR            | -0,70           | ND              | ND               | PA4252 rplX            | -0,45           | -0,10           | 0,15             |
| PA0374 ftsE            | 0,04            | -0,07           | -0,23            | PA2277 arsR            | 0,36            | ND              | ND               | PA4253 rplN            | -0,46           | -0,07           | 0,26             |
| PA0375 ftsX            | 0,19            | 0,02            | -0,12            | PA2278 arsB            | 0,28            | ND              | ND               | PA4254 rpsQ            | -0,43           | -0,21           | -0,18            |
| PA0376 rpoH            | 0,09            | ND              | ND               | PA2279 arsC            | 0,00            | ND              | ND               | PA4255 rpmC            | -0,28           | 0,04            | 0,39             |
| PA0377 -               | 0,23            | ND              | ND               | PA2280 -               | 0,47            | ND              | ND               | PA4256 rplP            | -0,33           | 0,01            | 0,36             |
| PA0378 -               | 0,20            | ND              | ND               | PA2281 -               | 0,42            | ND              | ND               | PA4257 rpsC            | -0,44           | -0,09           | 0,17             |
| PA0379 -               | -0,27           | ND              | ND               | PA2282 -               | 0,81            | ND              | ND               | PA4258 rplV            | -0,45           | -0,09           | 0,20             |
| PA0380 -               | 0,36            | ND              | ND               | PA2285 -               | 0,32            | 0,23            | 0,33             | PA4259 rpsS            | -0,34           | -0,07           | 0,13             |
| PA0381 thiG            | 0,08            | -0,13           | -0,45            | PA2286 -               | 0,24            | ND              | ND               | PA4260 rplB            | -0,28           | -0,08           | 0,04             |
| PA0382 micA            | 0,11            | -0,01           | -0,15            | PA2287 -               | -0,15           | ND              | ND               | PA4261 rplW            | -0,26           | -0,05           | 0,12             |
| PA0383 -               | 0,13            | ND              | ND               | PA2288 -               | -0,19           | ND              | ND               | PA4262 rplD            | -0,25           | -0,04           | 0,14             |
| PA0384 -               | 0,00            | ND              | ND               | PA2289 -               | 0,93            | 0,38            | 0,14             | PA4263 rplC            | -0,01           | -0,02           | -0,06            |
| PA0385 -               | -0,05           | ND              | ND               | PA2290 gcd             | 0,80            | 0,70            | <b>1,20</b>      | PA4264 rpsJ            | -0,23           | -0,08           | 0,01             |
| PA0386 -               | 0,19            | 0,08            | 0,04             | PA2291 -               | <b>1,37</b>     | <b>2,56</b>     | <b>5,91</b>      | PA4265 tufA            | -0,39           | -0,23           | -0,25            |
| PA0387 -               | 0,07            | 0,06            | 0,10             | PA2292 -               | 0,00            | ND              | ND               | PA4266 fusA1           | -0,43           | -0,14           | 0,03             |
| PA0388 -               | 0,12            | -0,02           | -0,16            | PA2298 -               | -0,29           | ND              | ND               | PA4267 rpsG            | -0,38           | -0,05           | 0,23             |
| PA0389 -               | -0,06           | -0,07           | -0,14            | PA2299 -               | 0,00            | ND              | ND               | PA4268 rpsL            | -0,37           | -0,07           | 0,18             |
| PA0390 metX            | 0,08            | -0,07           | -0,28            | PA2301 -               | -0,13           | -0,03           | 0,03             | PA4269 rpoC            | -0,13           | -0,22           | -0,49            |
| PA0391 -               | <b>-1,37</b>    | ND              | ND               | PA2302 ambE            | 0,58            | 0,02            | -0,54            | PA4270 rpoB            | -0,09           | -0,19           | -0,44            |
| PA0392 -               | 0,04            | ND              | ND               | PA2303 ambD            | 0,54            | ND              | ND               | PA4270.1 -             | -0,07           | ND              | ND               |
| PA0393 proC            | -0,06           | 0,07            | 0,27             | PA2304 ambC            | 0,26            | ND              | ND               | PA4271 rplL            | -0,19           | 0,29            | <b>1,02</b>      |
| PA0394 -               | 0,18            | 0,11            | 0,14             | PA2305 ambB            | 0,28            | ND              | ND               | PA4272 rplJ            | -0,15           | -0,05           | 0,01             |
| PA0395 pilT            | -0,99           | -0,89           | <b>-1,55</b>     | PA2306 ambA            | 0,62            | ND              | ND               | PA4272.1 -             | -0,06           | ND              | ND               |
| PA0396 pilU            | <b>-2,01</b>    | <b>-1,11</b>    | <b>-1,16</b>     | PA2313 -               | 0,19            | ND              | ND               | PA4273 rplA            | -0,22           | -0,07           | 0,01             |
| PA0397 -               | -0,92           | ND              | ND               | PA2316 -               | -0,19           | ND              | ND               | PA4274 rplK            | -0,35           | -0,07           | 0,16             |
| PA0398 -               | -0,43           | ND              | ND               | PA2318 -               | -0,08           | ND              | ND               | PA4275 nusG            | 0,01            | -0,18           | -0,53            |
| PA0399 -               | -0,25           | -0,14           | -0,13            | PA2319 -               | -0,04           | ND              | ND               | PA4276 secE            | 0,14            | -0,18           | -0,65            |
| PA0400 -               | -0,35           | -0,10           | 0,07             | PA2320 gntR            | <b>-1,27</b>    | 0,31            | <b>2,14</b>      | PA4276.1 -             | 0,07            | ND              | ND               |
| PA0401 -               | -0,10           | 0,00            | 0,10             | PA2321 -               | <b>-1,78</b>    | ND              | ND               | PA4277 tufB            | -0,48           | ND              | ND               |
| PA0402 pyrB            | -0,02           | -0,04           | -0,08            | PA2322 -               | <b>-1,00</b>    | ND              | ND               | PA4277.1 -             | 0,75            | ND              | ND               |
| PA0403 pyrR            | -0,54           | -0,20           | -0,03            | PA2323 -               | -0,47           | 0,02            | 0,52             | PA4277.2 -             | <b>1,11</b>     | ND              | ND               |
| PA0404 -               | -0,17           | ND              | ND               | PA2328 -               | 0,87            | ND              | ND               | PA4277.3 -             | <b>1,26</b>     | ND              | ND               |
| PA0405 -               | -0,35           | ND              | ND               | PA2329 -               | 0,87            | ND              | ND               | PA4278 -               | -0,27           | -0,38           | -0,80            |
| PA0406 tonB3           | -0,58           | -0,43           | -0,64            | PA2330 -               | 0,92            | ND              | ND               | PA4279 -               | -0,12           | -0,34           | -0,84            |
| PA0407 gshB            | <b>-1,17</b>    | -0,03           | <b>1,09</b>      | PA2331 -               | 0,07            | ND              | ND               | PA4280 birA            | -0,11           | -0,16           | -0,35            |
| PA0408 pilG            | -0,97           | -0,79           | <b>-1,28</b>     | PA2332 -               | -0,40           | 0,23            | <b>1,04</b>      | PA4280.3 -             | -0,15           | ND              | ND               |
| PA0409 pilH            | -0,79           | -0,86           | <b>-1,65</b>     | PA2337 mtlR            | -0,13           | ND              | ND               | PA4280.4 -             | 0,13            | ND              | ND               |
| PA0410 pilI            | -0,52           | -0,53           | -0,98            | PA2344 mtlZ            | 0,28            | 0,23            | 0,38             | PA4281 sbcD            | -0,46           | ND              | ND               |
| PA0411 pilJ            | -0,81           | -0,92           | <b>-1,81</b>     | PA2345 -               | -0,29           | ND              | ND               | PA4282 -               | -0,04           | -0,04           | -0,06            |
| PA0412 pilK            | -0,69           | ND              | ND               | PA2352 -               | -0,47           | -0,45           | -0,82            | PA4283 recD            | 0,00            | 0,31            | 0,88             |
| PA0413 chpA            | -0,57           | -0,68           | <b>-1,36</b>     | PA2353 -               | 0,00            | ND              | ND               | PA4284 recB            | 0,08            | 0,36            | 0,95             |
| PA0414 chpB            | -0,66           | -0,13           | 0,29             | PA2358 -               | <b>-1,64</b>    | ND              | ND               | PA4285 recC            | 0,34            | 0,12            | 0,01             |
| PA0415 chpC            | -0,64           | -0,79           | <b>-1,59</b>     | PA2364 -               | -0,74           | ND              | ND               | PA4286 -               | 0,27            | ND              | ND               |
| PA0416 chpD            | -0,81           | ND              | ND               | PA2365 -               | <b>-1,46</b>    | ND              | ND               | PA4288 -               | -0,65           | ND              | ND               |
| PA0417 chpE            | -0,65           | ND              | ND               | PA2372 -               | 0,22            | ND              | ND               | PA4289 -               | <b>-2,00</b>    | ND              | ND               |
| PA0418 -               | -0,22           | -0,10           | -0,07            | PA2373 -               | 0,78            | ND              | ND               | PA4290 -               | <b>-4,58</b>    | -0,78           | <b>2,35</b>      |
| PA0419 -               | 0,46            | 0,28            | 0,35             | PA2376 -               | -0,46           | ND              | ND               | PA4291 -               | 0,86            | ND              | ND               |
| PA0420 bioA            | 0,15            | -0,34           | <b>-1,13</b>     | PA2378 -               | -0,81           | -0,09           | 0,55             | PA4292 -               | 0,30            | 0,07            | -0,10            |
| PA0421 -               | 0,23            | 0,03            | -0,15            | PA2379 -               | -0,64           | 0,03            | 0,72             | PA4296 pprB            | -0,09           | 0,22            | 0,70             |
| PA0422 -               | -0,26           | ND              | ND               | PA2380 -               | 0,24            | ND              | ND               | PA4297 tadG            | -0,87           | ND              | ND               |
| PA0423 pasP            | -0,26           | 0,45            | <b>1,55</b>      | PA2381 -               | -0,86           | ND              | ND               | PA4306 flp             | <b>-1,52</b>    | ND              | ND               |
| PA0424 mexR            | -0,18           | 0,15            | 0,60             | PA2383 -               | -0,42           | ND              | ND               | PA4307 pctC            | -0,55           | -0,10           | 0,28             |
| PA0425 mexA            | 0,70            | 0,62            | <b>1,05</b>      | PA2384 -               | <b>1,81</b>     | ND              | ND               | PA4308 -               | -0,36           | 0,06            | 0,52             |
| PA0426 mexB            | 0,66            | 0,61            | <b>1,08</b>      | PA2386 pvdA            | <b>1,39</b>     | <b>3,11</b>     | <b>7,46</b>      | PA4309 pctA            | 0,18            | 0,41            | 0,99             |
| PA0427 oprM            | 0,64            | 0,67            | <b>1,26</b>      | PA2387 fpvI            | 0,28            | ND              | ND               | PA4310 pctB            | 0,05            | 0,15            | 0,37             |
| PA0428 -               | -0,29           | -0,04           | 0,19             | PA2388 fpvR            | 0,22            | ND              | ND               | PA4311 -               | -0,65           | ND              | ND               |
| PA0429 -               | -0,14           | 0,17            | 0,61             | PA2389 pvdR            | 0,69            | ND              | ND               | PA4312 -               | 0,34            | ND              | ND               |
| PA0430 metF            | -0,16           | 0,15            | 0,59             | PA2390 pvdT            | 0,69            | ND              | ND               | PA4313 -               | 0,30            | ND              | ND               |
| PA0431 -               | -0,10           | ND              | ND               | PA2391 opmQ            | 0,47            | 0,44            | 0,78             | PA4314 purU1           | 0,18            | 0,12            | 0,16             |
| PA0432 sahH            | -0,21           | -0,05           | 0,08             | PA2396 pvdF            | 0,58            | <b>2,01</b>     | <b>5,14</b>      | PA4315 mvaT            | -0,15           | 0,01            | 0,17             |
| PA0433 -               | 0,63            | ND              | ND               | PA2397 pvdE            | 0,65            | ND              | ND               | PA4316 sbcB            | -0,44           | -0,13           | 0,07             |
| PA0434 -               | <b>1,38</b>     | ND              | ND               | PA2398 fpvA            | <b>1,20</b>     | <b>1,11</b>     | <b>1,96</b>      | PA4317 -               | 0,18            | 0,19            | 0,37             |
| PA0436 -               | -0,81           | ND              | ND               | PA2399 pvdD            | <b>1,14</b>     | 0,93            | <b>1,52</b>      | PA4318 -               | 0,38            | ND              | ND               |
| PA0437 codA            | -0,26           | 0,04            | 0,38             | PA2400 pvdJ            | ND              | <b>1,10</b>     | ND               | PA4319 -               | 0,20            | ND              | ND               |
| PA0438 codB            | 0,10            | ND              | ND               | PA2402 -               | ND              | <b>1,30</b>     | ND               | PA4320 -               | 0,14            | 0,11            | 0,16             |
| PA0445 -               | -0,16           | ND              | ND               | PA2403 -               | <b>1,29</b>     | ND              | ND               | PA4321 -               | 0,25            | -0,01           | -0,28            |
| PA0446 -               | <b>1,55</b>     | <b>1,43</b>     | <b>2,52</b>      | PA2404 -               | <b>1,24</b>     | ND              | ND               | PA4322 -               | 0,22            | 0,15            | 0,20             |
| PA0447 gcdH            | <b>2,64</b>     | <b>1,09</b>     | 0,48             | PA2405 -               | <b>1,58</b>     | ND              | ND               | PA4323 -               | 0,10            | -0,02           | -0,17            |

| ID – Gene <sup>a</sup> | TC <sup>b</sup> | PC <sup>c</sup> | PTV <sup>d</sup> | ID – Gene <sup>a</sup> | TC <sup>b</sup> | PC <sup>c</sup> | PTV <sup>d</sup> | ID – Gene <sup>a</sup> | TC <sup>b</sup> | PC <sup>c</sup> | PTV <sup>d</sup> |
|------------------------|-----------------|-----------------|------------------|------------------------|-----------------|-----------------|------------------|------------------------|-----------------|-----------------|------------------|
| PA0448 -               | -0,28           | ND              | ND               | PA2406 -               | 1,32            | ND              | ND               | PA4324 -               | -0,19           | ND              | ND               |
| PA0449 -               | -0,24           | -0,06           | 0,08             | PA2407 -               | 1,84            | ND              | ND               | PA4325 -               | -0,17           | ND              | ND               |
| PA0450 -               | 0,28            | ND              | ND               | PA2408 -               | 2,26            | ND              | ND               | PA4326 -               | -0,33           | ND              | ND               |
| PA0453 -               | -1,13           | ND              | ND               | PA2409 -               | 1,93            | ND              | ND               | PA4327 -               | -0,30           | ND              | ND               |
| PA0454 -               | -0,07           | ND              | ND               | PA2410 -               | 1,79            | 0,96            | 0,94             | PA4328 -               | -0,38           | 0,06            | 0,53             |
| PA0455 dbpA            | -0,36           | -0,01           | 0,35             | PA2411 -               | 2,50            | ND              | ND               | PA4329 pykA            | -0,36           | -0,17           | -0,11            |
| PA0456 -               | -0,61           | -0,15           | 0,19             | PA2412 -               | 2,63            | ND              | ND               | PA4330 -               | -0,50           | ND              | ND               |
| PA0457 -               | -0,47           | ND              | ND               | PA2413 pvdH            | ND              | 1,26            | ND               | PA4331 -               | -0,25           | ND              | ND               |
| PA0457.1 -             | 0,06            | ND              | ND               | PA2417 -               | 0,09            | ND              | ND               | PA4332 -               | -0,02           | ND              | ND               |
| PA0458 -               | -0,47           | ND              | ND               | PA2423 -               | -0,08           | ND              | ND               | PA4333 -               | -0,28           | -0,29           | -0,54            |
| PA0459 -               | ND              | -0,25           | ND               | PA2424 pvdL            | ND              | 1,26            | ND               | PA4334 -               | 0,14            | ND              | ND               |
| PA0460 -               | 0,29            | 0,01            | -0,27            | PA2426 pvdS            | 1,44            | ND              | ND               | PA4335 -               | -0,26           | ND              | ND               |
| PA0461 -               | 0,01            | -0,02           | -0,08            | PA2432 bexR            | -0,32           | ND              | ND               | PA4336 -               | -0,16           | -0,02           | 0,11             |
| PA0462 -               | -0,65           | -0,06           | 0,48             | PA2433 -               | -1,49           | ND              | ND               | PA4338 -               | -0,22           | ND              | ND               |
| PA0463 creB            | -0,78           | -0,13           | 0,41             | PA2435 -               | -1,10           | ND              | ND               | PA4339 -               | -0,42           | ND              | ND               |
| PA0464 creC            | -0,15           | -0,06           | -0,03            | PA2436 -               | -1,73           | ND              | ND               | PA4340 -               | -0,28           | -0,05           | 0,13             |
| PA0467 -               | -0,24           | -0,05           | 0,08             | PA2440 -               | 1,95            | ND              | ND               | PA4345 -               | -0,31           | ND              | ND               |
| PA0468 -               | -0,76           | 0,02            | 0,83             | PA2441 -               | 2,62            | ND              | ND               | PA4346 -               | 0,64            | ND              | ND               |
| PA0469 -               | -1,00           | -0,56           | -0,60            | PA2442 gcvT2           | 2,63            | 1,70            | 2,20             | PA4347 -               | 0,71            | ND              | ND               |
| PA0470 fluA            | -0,24           | 1,05            | 3,22             | PA2443 sdaA            | 2,70            | 0,72            | -0,65            | PA4348 -               | -0,04           | ND              | ND               |
| PA0471 -               | 0,09            | ND              | ND               | PA2444 glyA2           | 2,37            | 1,15            | 0,90             | PA4349 -               | -0,09           | ND              | ND               |
| PA0472 -               | 0,12            | ND              | ND               | PA2445 gcvP2           | 2,51            | 1,98            | 3,13             | PA4350 -               | 1,29            | ND              | ND               |
| PA0473 -               | 0,03            | 0,83            | 2,35             | PA2446 gcvH2           | 2,68            | 2,37            | 4,08             | PA4351 -               | 1,24            | ND              | ND               |
| PA0475 -               | -0,09           | ND              | ND               | PA2449 -               | 0,37            | -0,10           | -0,65            | PA4352 -               | 0,01            | -0,23           | -0,66            |
| PA0476 -               | -0,46           | ND              | ND               | PA2450 -               | 0,35            | 0,13            | 0,02             | PA4353 -               | -0,87           | ND              | ND               |
| PA0477 -               | -1,25           | ND              | ND               | PA2453 -               | -0,72           | -0,52           | -0,78            | PA4354 -               | -0,23           | ND              | ND               |
| PA0478 -               | -0,47           | ND              | ND               | PA2454 -               | -0,45           | ND              | ND               | PA4355 -               | -0,35           | ND              | ND               |
| PA0479 -               | -0,54           | ND              | ND               | PA2455 -               | -0,39           | ND              | ND               | PA4356 xenB            | -0,77           | -0,64           | -1,06            |
| PA0481 -               | 0,33            | ND              | ND               | PA2456 -               | -0,49           | ND              | ND               | PA4357 -               | 1,75            | ND              | ND               |
| PA0482 glcB            | -0,55           | -0,43           | -0,68            | PA2457 -               | -0,08           | ND              | ND               | PA4358 -               | 1,10            | ND              | ND               |
| PA0483 -               | -1,47           | ND              | ND               | PA2458 -               | 0,54            | ND              | ND               | PA4359 -               | 0,73            | ND              | ND               |
| PA0484 -               | -0,64           | ND              | ND               | PA2459 -               | 0,70            | ND              | ND               | PA4360 -               | 0,18            | 0,18            | 0,32             |
| PA0485 -               | 0,71            | ND              | ND               | PA2460 -               | 0,39            | ND              | ND               | PA4361 -               | -0,17           | 0,26            | 0,92             |
| PA0486 -               | -0,55           | -0,24           | -0,12            | PA2461 -               | 0,84            | ND              | ND               | PA4362 -               | -0,46           | ND              | ND               |
| PA0487 -               | -1,14           | -0,01           | 1,10             | PA2462 -               | 0,75            | 0,26            | 0,00             | PA4363 iciA            | -0,32           | 0,19            | 0,86             |
| PA0488 -               | -0,11           | ND              | ND               | PA2463 -               | 0,50            | ND              | ND               | PA4366 sodB            | -0,85           | -0,32           | -0,05            |
| PA0490 -               | -0,18           | ND              | ND               | PA2464 -               | -0,22           | -0,05           | 0,09             | PA4367 bifA            | -0,42           | -0,08           | 0,18             |
| PA0491 -               | -0,72           | ND              | ND               | PA2467 foxR            | -0,32           | ND              | ND               | PA4368 -               | -0,42           | ND              | ND               |
| PA0492 -               | -1,25           | ND              | ND               | PA2468 foxI            | 0,08            | ND              | ND               | PA4369 -               | -0,89           | -0,35           | -0,10            |
| PA0493 -               | -0,77           | ND              | ND               | PA2469 -               | -0,54           | ND              | ND               | PA4370 icmP            | 0,07            | 0,88            | 2,44             |
| PA0494 -               | -0,32           | ND              | ND               | PA2476 dsbG            | -0,31           | -0,30           | -0,54            | PA4371 -               | 0,53            | 0,49            | 0,86             |
| PA0495 -               | 0,05            | ND              | ND               | PA2477 -               | -0,65           | ND              | ND               | PA4372 -               | 0,14            | 0,37            | 0,91             |
| PA0496 -               | -0,18           | ND              | ND               | PA2478 -               | 0,00            | ND              | ND               | PA4373 -               | 0,27            | 0,29            | 0,56             |
| PA0497 -               | 0,32            | ND              | ND               | PA2479 -               | -0,55           | ND              | ND               | PA4374 -               | -0,29           | -0,12           | -0,05            |
| PA0498 -               | -0,81           | ND              | ND               | PA2480 -               | -0,64           | ND              | ND               | PA4375 -               | -0,06           | ND              | ND               |
| PA0499 -               | -0,78           | ND              | ND               | PA2481 -               | -0,92           | 0,07            | 1,12             | PA4376 pncB2           | -0,08           | -0,16           | -0,38            |
| PA0500 bioB            | 0,48            | 0,06            | -0,30            | PA2482 -               | -1,16           | 0,05            | 1,31             | PA4377 -               | -0,42           | ND              | ND               |
| PA0501 bioF            | 0,68            | 0,08            | -0,46            | PA2483 -               | -0,37           | 0,04            | 0,48             | PA4378 inaA            | -0,05           | 0,08            | 0,28             |
| PA0502 -               | 0,60            | 0,06            | -0,43            | PA2484 -               | -0,05           | ND              | ND               | PA4379 -               | 0,06            | ND              | ND               |
| PA0503 -               | 0,72            | 0,21            | -0,13            | PA2485 -               | 0,09            | ND              | ND               | PA4380 -               | 0,06            | ND              | ND               |
| PA0504 bioD            | 0,98            | 0,12            | -0,63            | PA2486 -               | -0,11           | ND              | ND               | PA4381 -               | -0,16           | 0,17            | 0,66             |
| PA0505 -               | -0,67           | ND              | ND               | PA2488 -               | 0,00            | ND              | ND               | PA4382 -               | -0,65           | ND              | ND               |
| PA0506 -               | -0,19           | -0,16           | -0,26            | PA2489 -               | -0,54           | ND              | ND               | PA4383 -               | -0,56           | ND              | ND               |
| PA0507 -               | ND              | -0,32           | ND               | PA2490 -               | -0,70           | ND              | ND               | PA4384 -               | -0,37           | ND              | ND               |
| PA0508 -               | -0,83           | -0,23           | 0,17             | PA2491 -               | -0,20           | -0,27           | -0,58            | PA4385 groEL           | -0,17           | -0,16           | -0,28            |
| PA0509 nirN            | 2,00            | ND              | ND               | PA2492 mexT            | -0,04           | ND              | ND               | PA4386 groES           | -0,08           | -0,23           | -0,58            |
| PA0510 -               | 2,39            | ND              | ND               | PA2496 -               | 0,00            | ND              | ND               | PA4387 -               | -0,02           | 0,22            | 0,63             |
| PA0511 nirJ            | 1,77            | ND              | ND               | PA2497 -               | -0,13           | ND              | ND               | PA4388 -               | -0,35           | -0,22           | -0,28            |
| PA0512 -               | 2,64            | ND              | ND               | PA2500 -               | 0,06            | ND              | ND               | PA4389 speA            | -0,25           | 0,04            | 0,36             |
| PA0513 -               | 2,12            | ND              | ND               | PA2501 -               | -0,51           | ND              | ND               | PA4390 -               | 0,17            | -0,12           | -0,51            |
| PA0514 nirL            | 2,58            | ND              | ND               | PA2502 -               | 0,51            | ND              | ND               | PA4391 -               | -0,22           | ND              | ND               |
| PA0515 -               | 1,58            | ND              | ND               | PA2503 -               | -0,19           | -0,05           | 0,04             | PA4392 -               | -0,43           | ND              | ND               |
| PA0516 nirF            | 2,36            | ND              | ND               | PA2504 -               | 0,13            | ND              | ND               | PA4393 ampG            | -0,23           | ND              | ND               |
| PA0517 nirC            | 2,43            | ND              | ND               | PA2510 catR            | -0,78           | ND              | ND               | PA4394 -               | -0,17           | -0,04           | 0,05             |
| PA0518 nirM            | 1,69            | ND              | ND               | PA2523 -               | -0,87           | ND              | ND               | PA4395 -               | 0,05            | 0,13            | 0,32             |
| PA0519 nirS            | 0,05            | ND              | ND               | PA2524 -               | -0,53           | ND              | ND               | PA4396 -               | -0,91           | ND              | ND               |
| PA0520 nirQ            | -0,66           | ND              | ND               | PA2525 -               | 0,69            | 0,16            | -0,23            | PA4397 panE            | -0,35           | ND              | ND               |
| PA0525 -               | 0,87            | ND              | ND               | PA2526 -               | 0,71            | ND              | ND               | PA4398 -               | 0,00            | ND              | ND               |
| PA0526 -               | 0,24            | ND              | ND               | PA2527 -               | 0,07            | ND              | ND               | PA4399 -               | -0,29           | 0,27            | 1,05             |
| PA0527 dnr             | -0,42           | 0,08            | 0,65             | PA2528 -               | 0,18            | 0,05            | -0,04            | PA4400 -               | -0,81           | -0,25           | 0,11             |
| PA0527.1 rsmY          | 0,47            | ND              | ND               | PA2529 -               | -0,11           | -0,12           | -0,24            | PA4401 -               | 0,08            | ND              | ND               |
| PA0528 -               | -0,35           | ND              | ND               | PA2530 -               | -0,36           | 0,03            | 0,44             | PA4402 argJ            | 0,15            | -0,03           | -0,22            |
| PA0529 -               | -2,00           | ND              | ND               | PA2532 tpx             | -0,28           | 0,21            | 0,88             | PA4403 secA            | 0,01            | -0,05           | -0,16            |
| PA0530 -               | -1,00           | ND              | ND               | PA2533 -               | 1,08            | ND              | ND               | PA4404 -               | -0,32           | ND              | ND               |
| PA0532 -               | -0,92           | ND              | ND               | PA2534 -               | -0,55           | ND              | ND               | PA4405 -               | 0,32            | ND              | ND               |
| PA0533 -               | -0,13           | ND              | ND               | PA2535 -               | 0,17            | -0,41           | -1,35            | PA4406 lpxC            | 0,39            | 0,06            | -0,21            |

| ID – Gene <sup>a</sup> | TC <sup>b</sup> | PC <sup>c</sup> | PTV <sup>d</sup> | ID – Gene <sup>a</sup> | TC <sup>b</sup> | PC <sup>c</sup> | PTV <sup>d</sup> | ID – Gene <sup>a</sup> | TC <sup>b</sup> | PC <sup>c</sup> | PTV <sup>d</sup> |
|------------------------|-----------------|-----------------|------------------|------------------------|-----------------|-----------------|------------------|------------------------|-----------------|-----------------|------------------|
| PA0534 -               | 0,56            | ND              | ND               | PA2536 -               | 0,53            | ND              | ND               | PA4406.1 -             | 0,27            | ND              | ND               |
| PA0535 -               | 0,35            | ND              | ND               | PA2537 -               | 0,78            | 0,17            | -0,28            | PA4407 ftsZ            | 0,30            | 0,35            | 0,70             |
| PA0536 -               | -0,04           | 0,30            | 0,90             | PA2538 -               | 0,86            | ND              | ND               | PA4408 ftsA            | 0,25            | 0,27            | 0,53             |
| PA0537 -               | -0,21           | 0,08            | 0,45             | PA2539 -               | 0,60            | ND              | ND               | PA4409 ftsQ            | 0,38            | 0,47            | 0,95             |
| PA0538 dsbB            | -0,66           | ND              | ND               | PA2540 -               | 0,48            | 0,13            | -0,11            | PA4410 ddlB            | 0,21            | 0,42            | 0,98             |
| PA0540 -               | -0,37           | ND              | ND               | PA2541 -               | 0,52            | 0,03            | -0,42            | PA4411 murC            | 0,53            | 0,35            | 0,47             |
| PA0541 -               | 0,39            | 0,13            | -0,02            | PA2542 -               | 0,19            | ND              | ND               | PA4412 murG            | 0,32            | 0,39            | 0,81             |
| PA0542 -               | -0,13           | -0,14           | -0,26            | PA2543 -               | 0,16            | ND              | ND               | PA4413 ftsW            | 0,24            | ND              | ND               |
| PA0544 -               | -0,58           | ND              | ND               | PA2544 -               | -0,36           | ND              | ND               | PA4414 murD            | 0,46            | 0,29            | 0,38             |
| PA0545 -               | 0,98            | ND              | ND               | PA2545 xthA            | -0,47           | -0,21           | -0,12            | PA4415 mraY            | 0,42            | ND              | ND               |
| PA0546 metK            | -0,31           | -0,26           | -0,44            | PA2546 -               | 0,00            | ND              | ND               | PA4416 murF            | 0,36            | 0,28            | 0,44             |
| PA0547 -               | 0,03            | ND              | ND               | PA2547 -               | -0,87           | ND              | ND               | PA4417 murE            | 0,43            | 0,24            | 0,25             |
| PA0548 tktA            | -0,16           | -0,13           | -0,20            | PA2549 -               | -0,72           | ND              | ND               | PA4418 ftsI            | 0,42            | 0,11            | -0,09            |
| PA0549 -               | -0,10           | ND              | ND               | PA2550 -               | -0,22           | 0,21            | 0,81             | PA4419 ftsL            | 0,31            | ND              | ND               |
| PA0550 -               | -0,25           | ND              | ND               | PA2551 -               | 0,25            | 0,12            | 0,09             | PA4420 -               | 0,45            | 0,05            | -0,32            |
| PA0551 epd             | 0,10            | 0,14            | 0,29             | PA2552 -               | 3,27            | 1,72            | 1,61             | PA4421 -               | 0,36            | ND              | ND               |
| PA0552 pgk             | -0,14           | -0,14           | -0,26            | PA2553 -               | 4,09            | 2,36            | 2,63             | PA4421.1 rnpB          | 0,37            | ND              | ND               |
| PA0553 -               | -0,10           | ND              | ND               | PA2554 -               | 3,87            | 1,28            | -0,23            | PA4422 -               | 0,04            | 0,11            | 0,28             |
| PA0554 -               | 0,11            | ND              | ND               | PA2555 -               | 3,87            | 1,29            | -0,19            | PA4423 -               | -0,07           | 0,15            | 0,48             |
| PA0555 fda             | -0,33           | -0,22           | -0,31            | PA2556 -               | 0,45            | ND              | ND               | PA4424 -               | 0,49            | ND              | ND               |
| PA0556 -               | -0,12           | ND              | ND               | PA2557 -               | 1,78            | ND              | ND               | PA4425 -               | 0,20            | 0,25            | 0,52             |
| PA0557 -               | -0,18           | ND              | ND               | PA2558 -               | 0,00            | ND              | ND               | PA4426 -               | 0,04            | 0,14            | 0,37             |
| PA0558 -               | -0,61           | ND              | ND               | PA2559 -               | -0,19           | ND              | ND               | PA4427 sspB            | -0,10           | -0,02           | 0,03             |
| PA0559 -               | 0,12            | 0,08            | 0,11             | PA2560 -               | 1,33            | ND              | ND               | PA4428 sspA            | 0,09            | -0,06           | -0,27            |
| PA0560 -               | -0,42           | ND              | ND               | PA2561 -               | 0,19            | ND              | ND               | PA4429 -               | -0,05           | -0,04           | -0,05            |
| PA0561 -               | -0,16           | ND              | ND               | PA2562 -               | -0,44           | ND              | ND               | PA4430 -               | -0,13           | -0,13           | -0,23            |
| PA0562 -               | -0,10           | -0,14           | -0,30            | PA2563 -               | 0,29            | ND              | ND               | PA4431 -               | 0,03            | -0,23           | -0,67            |
| PA0563 -               | -0,26           | -0,29           | -0,58            | PA2567 -               | -0,22           | ND              | ND               | PA4432 rpsI            | -0,02           | -0,15           | -0,41            |
| PA0564 -               | -0,94           | ND              | ND               | PA2568 -               | -0,40           | ND              | ND               | PA4433 rplM            | 0,07            | -0,06           | -0,24            |
| PA0565 -               | 0,00            | ND              | ND               | PA2569 -               | -0,67           | ND              | ND               | PA4434 -               | -0,05           | -0,09           | -0,21            |
| PA0566 -               | -0,32           | ND              | ND               | PA2570.1 -             | -0,12           | ND              | ND               | PA4435 -               | -0,35           | ND              | ND               |
| PA0567 -               | -0,14           | ND              | ND               | PA2572 -               | -1,46           | ND              | ND               | PA4436 -               | 0,36            | ND              | ND               |
| PA0568 -               | 0,00            | 0,08            | 0,24             | PA2573 -               | -0,83           | ND              | ND               | PA4437 -               | 0,32            | ND              | ND               |
| PA0569 -               | -0,08           | ND              | ND               | PA2575 -               | -0,44           | 0,08            | 0,68             | PA4438 -               | 0,15            | -0,07           | -0,35            |
| PA0570 -               | -0,53           | ND              | ND               | PA2576 -               | -0,17           | ND              | ND               | PA4439 trpS            | -0,07           | -0,12           | -0,28            |
| PA0571 -               | -0,20           | -0,15           | -0,23            | PA2577 -               | -1,00           | ND              | ND               | PA4440 -               | -0,64           | -0,06           | 0,48             |
| PA0572 -               | -2,35           | ND              | ND               | PA2578 -               | 0,00            | ND              | ND               | PA4441 -               | 0,70            | 0,01            | -0,67            |
| PA0573 -               | -1,47           | ND              | ND               | PA2579 kynA            | 0,51            | 0,31            | 0,37             | PA4442 cysN            | 0,85            | 0,35            | 0,16             |
| PA0574 -               | -0,60           | ND              | ND               | PA2580 -               | 0,30            | ND              | ND               | PA4443 cysD            | 0,74            | 0,35            | 0,26             |
| PA0574.1 -             | 0,83            | ND              | ND               | PA2581 -               | -0,12           | 0,04            | 0,23             | PA4444 mltB1           | -0,23           | 0,54            | 1,77             |
| PA0576 rpoD            | 0,01            | -0,12           | -0,35            | PA2581.1 -             | 1,27            | ND              | ND               | PA4445 -               | -0,05           | -0,10           | -0,22            |
| PA0577 dnaG            | 0,27            | 0,12            | 0,06             | PA2582 -               | -0,27           | -0,18           | -0,26            | PA4446 algW            | 0,80            | 0,09            | -0,54            |
| PA0578 -               | 0,58            | 0,16            | -0,13            | PA2583 -               | 0,00            | 0,33            | 0,93             | PA4447 hisC1           | 0,00            | -0,24           | -0,68            |
| PA0579 rpsU            | 0,70            | -0,07           | -0,90            | PA2583.1 -             | 0,99            | ND              | ND               | PA4448 hisD            | -0,23           | -0,24           | -0,45            |
| PA0580 gcp             | 0,38            | -0,11           | -0,70            | PA2584 pgsA            | 0,53            | ND              | ND               | PA4449 hisG            | 0,00            | -0,01           | -0,03            |
| PA0581 -               | -0,15           | ND              | ND               | PA2585 uvrC            | 0,25            | ND              | ND               | PA4450 murA            | -0,07           | -0,11           | -0,24            |
| PA0582 folB            | 0,39            | 0,02            | -0,33            | PA2586 gacA            | 0,09            | 0,01            | -0,05            | PA4451 -               | 0,28            | ND              | ND               |
| PA0583 -               | 0,30            | 0,28            | 0,49             | PA2587 pqsH            | -0,49           | -0,44           | -0,76            | PA4451.1 -             | 0,15            | ND              | ND               |
| PA0584 cca             | -0,29           | 0,11            | 0,60             | PA2588 -               | -0,72           | ND              | ND               | PA4452 -               | 0,31            | 0,03            | -0,21            |
| PA0586 -               | -0,24           | ND              | ND               | PA2591 -               | -0,13           | ND              | ND               | PA4453 -               | 0,33            | 0,25            | 0,38             |
| PA0587 -               | -0,69           | ND              | ND               | PA2592 -               | -0,16           | -0,21           | -0,42            | PA4454 -               | 0,29            | 0,13            | 0,07             |
| PA0588 -               | -0,50           | -0,27           | -0,27            | PA2593 qteE            | -0,24           | ND              | ND               | PA4455 -               | 0,39            | 0,15            | 0,02             |
| PA0589 -               | -0,08           | ND              | ND               | PA2594 -               | -0,32           | ND              | ND               | PA4456 -               | 0,52            | 0,09            | -0,26            |
| PA0590 apaH            | -0,16           | -0,08           | -0,06            | PA2601 -               | -0,79           | -0,13           | 0,42             | PA4457 -               | -0,02           | -0,06           | -0,16            |
| PA0591 -               | -0,18           | -0,02           | 0,14             | PA2602 -               | -1,00           | ND              | ND               | PA4458 -               | 0,08            | 0,08            | 0,16             |
| PA0592 ksgA            | 0,32            | 0,07            | -0,13            | PA2603 -               | -0,22           | ND              | ND               | PA4459 -               | 0,09            | -0,03           | -0,18            |
| PA0593 pdxA            | 0,00            | -0,01           | -0,03            | PA2603.1 -             | -0,14           | ND              | ND               | PA4460 -               | 0,13            | 0,04            | -0,02            |
| PA0594 surA            | 0,02            | 0,14            | 0,37             | PA2604 -               | -0,39           | ND              | ND               | PA4461 -               | 0,12            | 0,05            | 0,01             |
| PA0595 ostA            | -0,04           | -0,15           | -0,38            | PA2605 -               | -0,52           | -0,15           | 0,10             | PA4462 rpoN            | 0,03            | 0,00            | -0,02            |
| PA0596 -               | 0,04            | 0,07            | 0,16             | PA2606 -               | -0,52           | ND              | ND               | PA4463 -               | -0,43           | ND              | ND               |
| PA0597 -               | -0,05           | -0,10           | -0,23            | PA2607 -               | -0,05           | 0,14            | 0,44             | PA4464 ptsN            | 0,07            | 0,32            | 0,84             |
| PA0598 -               | 0,14            | ND              | ND               | PA2608 -               | -0,26           | ND              | ND               | PA4465 -               | 0,31            | 0,06            | -0,13            |
| PA0599 -               | -0,23           | ND              | ND               | PA2609 -               | -0,03           | -0,21           | -0,57            | PA4466 -               | 0,40            | 0,15            | 0,03             |
| PA0600 -               | 0,05            | ND              | ND               | PA2610 -               | -0,18           | ND              | ND               | PA4468 sodM            | -0,53           | ND              | ND               |
| PA0601 -               | -0,22           | 0,14            | 0,62             | PA2611 cysG            | 0,11            | 0,04            | 0,00             | PA4470 fumC1           | -0,24           | 1,30            | 3,95             |
| PA0602 -               | -0,89           | ND              | ND               | PA2612 serS            | -0,02           | 0,02            | 0,07             | PA4472 pmbA            | -0,23           | 0,01            | 0,25             |
| PA0603 -               | -6,40           | -0,12           | 6,07             | PA2613 -               | 0,24            | 0,09            | 0,02             | PA4473 -               | 0,19            | 0,15            | 0,23             |
| PA0604 -               | -5,35           | 0,05            | 5,50             | PA2614 lolA            | 0,13            | 0,17            | 0,36             | PA4474 -               | -0,05           | -0,02           | -0,02            |
| PA0605 -               | -5,14           | 0,08            | 5,36             | PA2615 ftsK            | 0,00            | 0,00            | -0,01            | PA4475 -               | 0,09            | -0,03           | -0,18            |
| PA0606 -               | -4,67           | ND              | ND               | PA2616 trxB1           | -0,40           | -0,20           | -0,16            | PA4476 -               | 0,04            | -0,12           | -0,40            |
| PA0607 rpe             | 0,21            | 0,12            | 0,13             | PA2617 aat             | 0,24            | ND              | ND               | PA4477 cafA            | -0,34           | 0,10            | 0,62             |
| PA0608 -               | 0,42            | ND              | ND               | PA2618 -               | 0,08            | ND              | ND               | PA4478 -               | -0,11           | 0,16            | 0,55             |
| PA0609 trpE            | 0,21            | 0,17            | 0,28             | PA2619 infA            | 0,77            | 0,05            | -0,63            | PA4479 mreD            | 0,24            | ND              | ND               |
| PA0610 prtN            | -0,18           | ND              | ND               | PA2620 clpA            | 0,02            | 0,00            | -0,01            | PA4480 mreC            | 0,19            | 0,01            | -0,17            |
| PA0611 prtR            | -0,60           | ND              | ND               | PA2621 -               | -0,13           | -0,09           | -0,11            | PA4481 mreB            | 0,21            | 0,00            | -0,23            |
| PA0612 ptrB            | -0,06           | ND              | ND               | PA2622 cspD            | -0,85           | -0,49           | -0,54            | PA4482 gatC            | -0,11           | 0,26            | 0,84             |

| ID – Gene <sup>a</sup> | TC <sup>b</sup> | PC <sup>c</sup> | PTV <sup>d</sup> | ID – Gene <sup>a</sup> | TC <sup>b</sup> | PC <sup>c</sup> | PTV <sup>d</sup> | ID – Gene <sup>a</sup> | TC <sup>b</sup> | PC <sup>c</sup> | PTV <sup>d</sup> |
|------------------------|-----------------|-----------------|------------------|------------------------|-----------------|-----------------|------------------|------------------------|-----------------|-----------------|------------------|
| PA0613 -               | -0,23           | ND              | ND               | PA2623 icd             | -0,62           | -0,52           | -0,87            | PA4483 gatA            | -0,17           | 0,07            | 0,36             |
| PA0614 -               | -0,52           | ND              | ND               | PA2624 idh             | -0,88           | -0,36           | -0,16            | PA4484 gatB            | -0,11           | 0,03            | 0,21             |
| PA0615 -               | -0,63           | ND              | ND               | PA2625 -               | -0,33           | ND              | ND               | PA4485 -               | 0,37            | ND              | ND               |
| PA0616 -               | -0,81           | ND              | ND               | PA2626 trmU            | 0,06            | 0,03            | 0,03             | PA4486 -               | 0,24            | ND              | ND               |
| PA0617 -               | -0,55           | ND              | ND               | PA2627 -               | 0,06            | 0,06            | 0,10             | PA4487 -               | 0,20            | 0,30            | 0,66             |
| PA0618 -               | -0,53           | -0,26           | -0,21            | PA2628 -               | -0,24           | ND              | ND               | PA4488 -               | 0,25            | ND              | ND               |
| PA0619 -               | -0,50           | ND              | ND               | PA2629 purB            | 0,03            | -0,11           | -0,34            | PA4489 -               | 0,12            | 0,13            | 0,24             |
| PA0620 -               | -0,53           | ND              | ND               | PA2630 -               | -0,07           | -0,24           | -0,62            | PA4490 -               | 0,29            | ND              | ND               |
| PA0621 -               | -0,46           | ND              | ND               | PA2631 -               | -0,17           | -0,05           | 0,02             | PA4491 -               | 0,20            | 0,15            | 0,24             |
| PA0622 -               | -0,59           | -0,68           | -1,36            | PA2632 -               | -0,46           | ND              | ND               | PA4492 -               | 0,20            | ND              | ND               |
| PA0623 -               | -0,64           | -0,49           | -0,77            | PA2633 -               | -0,63           | ND              | ND               | PA4493 roxR            | 0,01            | 0,05            | 0,13             |
| PA0624 -               | -0,66           | ND              | ND               | PA2634 aceA            | -0,21           | -0,25           | -0,50            | PA4494 roxS            | -0,07           | 0,32            | 0,97             |
| PA0625 -               | -0,80           | ND              | ND               | PA2637 nuoA            | 0,13            | -0,08           | -0,35            | PA4495 -               | -0,17           | -0,17           | -0,31            |
| PA0626 -               | -0,50           | ND              | ND               | PA2638 nuoB            | -0,10           | -0,06           | -0,07            | PA4496 -               | 1,45            | 1,72            | 3,44             |
| PA0627 -               | -0,50           | ND              | ND               | PA2639 nuoD            | -0,14           | -0,02           | 0,10             | PA4497 -               | 1,29            | ND              | ND               |
| PA0628 -               | -0,42           | ND              | ND               | PA2640 nuoE            | -0,14           | -0,03           | 0,05             | PA4498 -               | 1,23            | 1,70            | 3,62             |
| PA0629 -               | -0,63           | ND              | ND               | PA2641 nuoF            | 0,01            | 0,04            | 0,11             | PA4499 -               | 1,19            | 0,47            | 0,16             |
| PA0630 -               | -0,49           | ND              | ND               | PA2642 nuoG            | -0,05           | -0,02           | 0,00             | PA4500 -               | 3,37            | 2,33            | 3,27             |
| PA0631 -               | -0,37           | ND              | ND               | PA2643 nuoH            | 0,01            | 0,02            | 0,05             | PA4501 opdP            | 4,52            | 2,52            | 2,66             |
| PA0632 -               | -0,58           | ND              | ND               | PA2644 nuoI            | 0,12            | 0,07            | 0,08             | PA4502 -               | 4,52            | 2,58            | 2,83             |
| PA0633 -               | -0,86           | -0,70           | -1,13            | PA2645 nuoJ            | 0,22            | ND              | ND               | PA4503 -               | 4,43            | 2,30            | 2,12             |
| PA0634 -               | -0,98           | -0,51           | -0,46            | PA2646 nuoK            | 0,08            | ND              | ND               | PA4504 -               | 4,85            | 2,37            | 1,88             |
| PA0635 -               | -0,97           | ND              | ND               | PA2647 nuoL            | 0,22            | -0,05           | -0,35            | PA4505 -               | 4,61            | 2,35            | 2,08             |
| PA0636 -               | -0,69           | ND              | ND               | PA2648 nuoM            | 0,14            | 0,14            | 0,26             | PA4506 -               | 4,55            | 2,16            | 1,59             |
| PA0637 -               | -0,78           | ND              | ND               | PA2649 nuoN            | 0,31            | ND              | ND               | PA4507 -               | 1,22            | ND              | ND               |
| PA0638 -               | -0,97           | ND              | ND               | PA2650 -               | 0,08            | ND              | ND               | PA4508 -               | 0,33            | ND              | ND               |
| PA0639 -               | -0,77           | ND              | ND               | PA2651 -               | -0,81           | ND              | ND               | PA4509 -               | -0,09           | ND              | ND               |
| PA0640 -               | -0,58           | ND              | ND               | PA2652 -               | -0,65           | -0,48           | -0,73            | PA4510 -               | -0,18           | ND              | ND               |
| PA0641 -               | -0,64           | ND              | ND               | PA2653 -               | -0,29           | ND              | ND               | PA4511 -               | -0,25           | ND              | ND               |
| PA0642 -               | -0,62           | ND              | ND               | PA2654 -               | -0,57           | -0,14           | 0,17             | PA4512 lpxO1           | -0,71           | -0,02           | 0,65             |
| PA0643 -               | -0,60           | ND              | ND               | PA2655 -               | -0,35           | ND              | ND               | PA4513 -               | 0,66            | 0,84            | 1,73             |
| PA0644 -               | -0,82           | ND              | ND               | PA2656 -               | 0,17            | ND              | ND               | PA4514 -               | 0,87            | 1,99            | 4,80             |
| PA0645 -               | -0,65           | ND              | ND               | PA2657 -               | -0,42           | -0,05           | 0,28             | PA4515 -               | 0,73            | 0,93            | 1,91             |
| PA0646 -               | -0,90           | ND              | ND               | PA2658 -               | -0,57           | ND              | ND               | PA4516 -               | 0,28            | ND              | ND               |
| PA0647 -               | -0,79           | ND              | ND               | PA2659 -               | -0,58           | ND              | ND               | PA4517 -               | -0,07           | ND              | ND               |
| PA0648 -               | -0,73           | ND              | ND               | PA2660 -               | -0,26           | -0,24           | -0,44            | PA4518 -               | 0,00            | ND              | ND               |
| PA0649 trpG            | -0,14           | 0,17            | 0,61             | PA2661 -               | -0,08           | ND              | ND               | PA4519 speC            | 0,47            | 0,23            | 0,17             |
| PA0650 trpD            | -0,23           | -0,04           | 0,11             | PA2662 -               | -0,42           | ND              | ND               | PA4520 -               | 0,30            | 0,15            | 0,12             |
| PA0651 trpC            | -0,28           | -0,04           | 0,18             | PA2663 ppyR            | -0,81           | ND              | ND               | PA4521 -               | -0,37           | -0,02           | 0,32             |
| PA0652 vfr             | -1,60           | -0,69           | -0,35            | PA2665 -               | -0,16           | -0,09           | -0,09            | PA4522 ampD            | -0,66           | ND              | ND               |
| PA0653 -               | -0,20           | 0,00            | 0,21             | PA2666 -               | 0,15            | ND              | ND               | PA4523 -               | -1,61           | ND              | ND               |
| PA0654 speD            | 0,26            | -0,21           | -0,87            | PA2667 -               | -0,31           | 0,11            | 0,63             | PA4524 nadC            | -0,10           | 0,00            | 0,09             |
| PA0655 -               | -0,74           | -0,05           | 0,59             | PA2668 -               | -0,31           | ND              | ND               | PA4524.1 -             | -0,24           | ND              | ND               |
| PA0656 -               | -0,80           | ND              | ND               | PA2678 -               | -1,70           | ND              | ND               | PA4525 pilA            | -0,26           | -0,62           | -1,50            |
| PA0657 -               | -0,54           | ND              | ND               | PA2679 -               | -3,12           | 0,04            | 3,23             | PA4526 pilB            | -0,66           | -0,42           | -0,55            |
| PA0658 -               | -0,42           | -0,37           | -0,65            | PA2681 -               | -0,78           | ND              | ND               | PA4528 pilD            | -1,84           | ND              | ND               |
| PA0659 -               | -0,49           | -0,53           | -1,00            | PA2682 -               | -0,46           | ND              | ND               | PA4529 coaE            | -0,87           | -0,20           | 0,30             |
| PA0660 -               | -0,56           | 0,03            | 0,64             | PA2683 -               | -0,18           | ND              | ND               | PA4530 -               | -0,89           | ND              | ND               |
| PA0661 -               | -0,69           | ND              | ND               | PA2684 -               | -0,21           | -0,02           | 0,16             | PA4531 -               | -0,17           | ND              | ND               |
| PA0662 argC            | -0,12           | -0,21           | -0,47            | PA2685 -               | -0,30           | ND              | ND               | PA4532 -               | 0,40            | ND              | ND               |
| PA0663 -               | -0,41           | -0,27           | -0,35            | PA2686 pfeR            | -0,13           | ND              | ND               | PA4533 -               | 0,22            | 0,04            | -0,09            |
| PA0664 -               | -0,44           | -0,49           | -0,96            | PA2687 pfeS            | -0,13           | ND              | ND               | PA4534 -               | 0,41            | ND              | ND               |
| PA0665 -               | -0,27           | 0,17            | 0,76             | PA2690 -               | 0,22            | ND              | ND               | PA4535 -               | -0,98           | ND              | ND               |
| PA0666 -               | -0,18           | 0,24            | 0,87             | PA2691 -               | -1,14           | 0,15            | 1,56             | PA4536 -               | -0,64           | ND              | ND               |
| PA0667 -               | -0,23           | ND              | ND               | PA2692 -               | -0,11           | -0,17           | -0,38            | PA4537 -               | -0,08           | ND              | ND               |
| PA0668 tyrZ            | -0,27           | -0,18           | -0,25            | PA2693 -               | 0,00            | ND              | ND               | PA4538 ndh             | -0,66           | -0,17           | 0,19             |
| PA0668.2 -             | 0,09            | ND              | ND               | PA2694 -               | 0,14            | ND              | ND               | PA4539 -               | 0,23            | ND              | ND               |
| PA0668.3 -             | -0,12           | ND              | ND               | PA2695 -               | -0,06           | ND              | ND               | PA4541 -               | -0,24           | ND              | ND               |
| PA0668.5 -             | 0,64            | ND              | ND               | PA2698 -               | -0,32           | ND              | ND               | PA4541.1 -             | 1,87            | ND              | ND               |
| PA0670 -               | 0,00            | ND              | ND               | PA2702 -               | -0,14           | ND              | ND               | PA4541.2 -             | 2,03            | ND              | ND               |
| PA0672 hemO            | 0,51            | 2,55            | 6,75             | PA2703 -               | -0,64           | ND              | ND               | PA4541.3 -             | 2,23            | ND              | ND               |
| PA0673 -               | -0,35           | ND              | ND               | PA2704 -               | -0,58           | ND              | ND               | PA4542 clpB            | 0,24            | -0,14           | -0,62            |
| PA0688 -               | 1,12            | ND              | ND               | PA2705 -               | -0,87           | -0,06           | 0,69             | PA4543 -               | 0,23            | ND              | ND               |
| PA0689 -               | 0,31            | ND              | ND               | PA2706 -               | -0,47           | ND              | ND               | PA4544 rluD            | 0,32            | 0,18            | 0,20             |
| PA0703 -               | 0,29            | ND              | ND               | PA2707 -               | -0,87           | -0,26           | 0,15             | PA4545 comL            | 0,27            | 0,05            | -0,13            |
| PA0704 -               | 0,09            | ND              | ND               | PA2709 cysK            | -1,08           | -0,35           | 0,08             | PA4546 pilS            | 0,22            | ND              | ND               |
| PA0705 migA            | 0,18            | 0,12            | 0,16             | PA2710 -               | -0,43           | ND              | ND               | PA4547 pilR            | -0,09           | -0,17           | -0,39            |
| PA0706 cat             | 0,09            | ND              | ND               | PA2712 -               | 1,49            | ND              | ND               | PA4548 -               | -0,97           | -0,42           | -0,23            |
| PA0708 -               | 0,05            | ND              | ND               | PA2713 -               | -0,28           | ND              | ND               | PA4550 fimU            | -2,27           | ND              | ND               |
| PA0709 -               | 0,28            | ND              | ND               | PA2715 -               | -0,87           | ND              | ND               | PA4551 pilV            | -2,00           | ND              | ND               |
| PA0710 gloA2           | -0,29           | ND              | ND               | PA2718 -               | -0,94           | ND              | ND               | PA4552 pilW            | -2,06           | ND              | ND               |
| PA0712 -               | 0,19            | ND              | ND               | PA2720 -               | -0,09           | 0,22            | 0,72             | PA4553 pilX            | -1,85           | -1,12           | -1,32            |
| PA0713 -               | -2,97           | ND              | ND               | PA2723 -               | -0,82           | ND              | ND               | PA4554 pilY1           | -1,70           | -1,38           | -2,22            |
| PA0714.1 phrD          | 0,00            | ND              | ND               | PA2725 -               | -0,38           | -0,35           | -0,63            | PA4555 pilY2           | -1,52           | ND              | ND               |
| PA0715 -               | 0,22            | 0,14            | 0,16             | PA2726 -               | -0,40           | ND              | ND               | PA4556 pilE            | -1,37           | -0,95           | -1,32            |
| PA0716 -               | 0,30            | ND              | ND               | PA2727 -               | -0,29           | 0,07            | 0,49             | PA4557 lytB            | 0,42            | 0,16            | 0,03             |

| ID – Gene <sup>a</sup> | TC <sup>b</sup> | PC <sup>c</sup> | PTV <sup>d</sup> | ID – Gene <sup>a</sup> | TC <sup>b</sup> | PC <sup>c</sup> | PTV <sup>d</sup> | ID – Gene <sup>a</sup> | TC <sup>b</sup> | PC <sup>c</sup> | PTV <sup>d</sup> |
|------------------------|-----------------|-----------------|------------------|------------------------|-----------------|-----------------|------------------|------------------------|-----------------|-----------------|------------------|
| PA0717 -               | 0,24            | ND              | ND               | PA2728 -               | -0,44           | ND              | ND               | PA4558 -               | 0,25            | 0,18            | 0,26             |
| PA0718 -               | -0,58           | ND              | ND               | PA2729 -               | -0,35           | ND              | ND               | PA4559 lspA            | 0,25            | ND              | ND               |
| PA0719 -               | -0,29           | ND              | ND               | PA2730 -               | -0,10           | 0,16            | 0,54             | PA4560 ileS            | 0,13            | 0,07            | 0,07             |
| PA0720 -               | -0,57           | ND              | ND               | PA2731 -               | 0,01            | ND              | ND               | PA4561 ribF            | 0,27            | 0,05            | -0,14            |
| PA0721 -               | -0,14           | ND              | ND               | PA2732 -               | -0,04           | -0,28           | -0,75            | PA4562 -               | 0,29            | ND              | ND               |
| PA0722 -               | -0,23           | ND              | ND               | PA2733 -               | -0,10           | ND              | ND               | PA4563 rpsT            | 0,47            | -0,14           | -0,85            |
| PA0723 coaB            | 0,19            | ND              | ND               | PA2734 -               | -0,10           | -0,25           | -0,62            | PA4564 -               | 0,18            | 0,12            | 0,15             |
| PA0727 -               | -0,24           | ND              | ND               | PA2735 -               | -0,20           | -0,23           | -0,46            | PA4565 proB            | 0,07            | 0,12            | 0,26             |
| PA0728 -               | 0,00            | ND              | ND               | PA2736 -               | 0,26            | ND              | ND               | PA4566 obg             | -0,19           | -0,10           | -0,09            |
| PA0729 -               | 0,12            | 0,17            | 0,36             | PA2736.1 -             | 1,20            | ND              | ND               | PA4567 rpmA            | -0,16           | -0,14           | -0,25            |
| PA0729.1 -             | 0,75            | ND              | ND               | PA2737 -               | -0,40           | 0,50            | 1,82             | PA4568 rplU            | -0,06           | -0,11           | -0,26            |
| PA0730 -               | 0,09            | ND              | ND               | PA2738 himA            | -0,54           | -0,34           | -0,42            | PA4569 ispB            | 0,26            | 0,02            | -0,20            |
| PA0731 -               | 0,56            | ND              | ND               | PA2739 pheT            | -0,20           | -0,13           | -0,18            | PA4570 -               | -0,29           | ND              | ND               |
| PA0732 -               | -0,49           | ND              | ND               | PA2740 pheS            | -0,16           | -0,15           | -0,26            | PA4571 -               | 0,49            | -0,15           | -0,91            |
| PA0733 -               | -0,30           | ND              | ND               | PA2741 rplT            | -0,02           | -0,05           | -0,13            | PA4572 fklB            | -0,38           | -0,34           | -0,60            |
| PA0734 -               | -0,08           | ND              | ND               | PA2742 rpmI            | -0,14           | -0,03           | 0,06             | PA4573 -               | 0,53            | ND              | ND               |
| PA0735 -               | 0,00            | ND              | ND               | PA2743 infC            | -0,01           | 0,04            | 0,13             | PA4574 -               | 0,70            | ND              | ND               |
| PA0736 -               | -0,04           | ND              | ND               | PA2744 thrS            | -0,10           | -0,18           | -0,42            | PA4575 -               | -0,43           | ND              | ND               |
| PA0739 -               | -0,32           | ND              | ND               | PA2744.1 -             | -0,46           | ND              | ND               | PA4576 -               | -0,08           | -0,01           | 0,04             |
| PA0741 -               | -1,22           | 0,00            | 1,21             | PA2745 -               | -0,17           | -0,25           | -0,54            | PA4577 -               | -0,99           | -0,32           | 0,09             |
| PA0742 -               | -3,39           | ND              | ND               | PA2746 -               | -0,70           | ND              | ND               | PA4578 -               | -0,08           | ND              | ND               |
| PA0743 -               | 0,65            | ND              | ND               | PA2747 -               | 0,19            | ND              | ND               | PA4579 -               | -0,34           | -0,18           | -0,16            |
| PA0744 -               | 1,86            | 1,28            | 1,78             | PA2748 -               | -0,49           | ND              | ND               | PA4580 -               | -0,17           | ND              | ND               |
| PA0745 -               | 1,65            | 0,79            | 0,60             | PA2749 endA            | 0,10            | ND              | ND               | PA4581 rtcR            | -0,25           | ND              | ND               |
| PA0746 -               | 1,65            | 0,92            | 0,97             | PA2750 -               | -0,16           | ND              | ND               | PA4581.1 -             | -0,01           | ND              | ND               |
| PA0747 -               | 0,47            | ND              | ND               | PA2752 -               | 0,22            | ND              | ND               | PA4582 -               | -0,25           | 0,06            | 0,40             |
| PA0749 -               | 0,58            | ND              | ND               | PA2753 -               | -1,65           | ND              | ND               | PA4583 -               | -0,50           | -0,21           | -0,11            |
| PA0750 ung             | 0,23            | -0,03           | -0,31            | PA2754 -               | -0,40           | ND              | ND               | PA4584 -               | -0,27           | ND              | ND               |
| PA0751 -               | 0,22            | ND              | ND               | PA2755 eco             | -0,87           | -0,48           | -0,48            | PA4585 rtcA            | -0,15           | 0,32            | 1,06             |
| PA0752 -               | 0,28            | ND              | ND               | PA2756 -               | -0,49           | ND              | ND               | PA4586 -               | 0,18            | ND              | ND               |
| PA0753 -               | 0,78            | ND              | ND               | PA2757 -               | -0,38           | ND              | ND               | PA4587 ccpR            | 0,37            | ND              | ND               |
| PA0754 -               | 0,06            | 2,80            | 7,90             | PA2758 -               | -1,08           | ND              | ND               | PA4588 gdhA            | -0,42           | ND              | ND               |
| PA0755 opdH            | -0,50           | 2,54            | 7,72             | PA2759 -               | -2,65           | ND              | ND               | PA4589 -               | 0,65            | ND              | ND               |
| PA0756 -               | -0,04           | 0,36            | 1,07             | PA2760 -               | 0,33            | 0,89            | 2,21             | PA4590 pra             | -0,06           | ND              | ND               |
| PA0757 -               | -0,13           | ND              | ND               | PA2761 -               | -0,96           | ND              | ND               | PA4592 -               | 0,00            | ND              | ND               |
| PA0758 -               | -0,61           | -0,62           | -1,15            | PA2762 -               | -0,95           | ND              | ND               | PA4593 -               | -0,29           | ND              | ND               |
| PA0759 -               | -0,05           | 0,19            | 0,60             | PA2763 -               | -0,78           | ND              | ND               | PA4594 -               | -0,55           | ND              | ND               |
| PA0760 -               | 0,58            | ND              | ND               | PA2764 -               | -0,44           | ND              | ND               | PA4595 -               | -0,30           | -0,24           | -0,37            |
| PA0761 nadB            | 0,16            | 0,23            | 0,51             | PA2765 -               | -0,20           | -0,38           | -0,87            | PA4596 -               | -0,49           | ND              | ND               |
| PA0762 algU            | 0,38            | 0,19            | 0,18             | PA2766 -               | -0,50           | ND              | ND               | PA4597 oprJ            | 0,13            | ND              | ND               |
| PA0763 mucA            | 0,40            | 0,49            | 0,99             | PA2767 -               | -0,46           | ND              | ND               | PA4598 mexD            | -0,46           | ND              | ND               |
| PA0764 mucB            | 0,49            | 0,28            | 0,30             | PA2768 -               | -0,25           | ND              | ND               | PA4600 nfxB            | -0,28           | ND              | ND               |
| PA0765 mucC            | 0,73            | ND              | ND               | PA2769 -               | -0,44           | ND              | ND               | PA4601 morA            | 0,00            | 0,35            | 1,00             |
| PA0766 mucD            | 0,72            | 0,45            | 0,57             | PA2770 -               | -0,70           | -0,60           | -1,00            | PA4602 glyA3           | 0,01            | -0,12           | -0,34            |
| PA0767 lepA            | 0,29            | 0,30            | 0,56             | PA2771 -               | 0,10            | ND              | ND               | PA4603 -               | -1,16           | ND              | ND               |
| PA0768 lepB            | 0,20            | 0,20            | 0,38             | PA2772 -               | 0,41            | ND              | ND               | PA4604 -               | -1,24           | -0,50           | -0,19            |
| PA0769 -               | 0,14            | -0,40           | -1,29            | PA2773 -               | 0,07            | ND              | ND               | PA4605 -               | -1,21           | ND              | ND               |
| PA0770 rnc             | 0,04            | 0,07            | 0,17             | PA2774 -               | -0,13           | -0,11           | -0,17            | PA4606 -               | -1,52           | -0,19           | 0,98             |
| PA0771 era             | 0,08            | 0,27            | 0,69             | PA2775 -               | 0,07            | ND              | ND               | PA4607 -               | -0,79           | ND              | ND               |
| PA0772 recO            | 0,11            | ND              | ND               | PA2776 -               | -1,55           | 0,20            | 2,13             | PA4608 -               | -0,47           | ND              | ND               |
| PA0773 pdxJ            | 0,36            | -0,64           | -2,17            | PA2777 -               | -0,11           | ND              | ND               | PA4609 radA            | 0,18            | -0,04           | -0,29            |
| PA0774 -               | 0,35            | 0,20            | 0,21             | PA2778 -               | 0,43            | ND              | ND               | PA4610 -               | -0,75           | ND              | ND               |
| PA0775 -               | 0,72            | 0,19            | -0,18            | PA2779 -               | 0,48            | ND              | ND               | PA4611 -               | -1,00           | ND              | ND               |
| PA0777 -               | 0,07            | ND              | ND               | PA2780 -               | -1,42           | ND              | ND               | PA4612 -               | -0,46           | ND              | ND               |
| PA0778 icp             | 0,16            | 0,39            | 0,95             | PA2781 -               | -1,00           | ND              | ND               | PA4613 katB            | 0,68            | 0,74            | 1,43             |
| PA0779 -               | 0,28            | 0,02            | -0,22            | PA2788 -               | -1,14           | ND              | ND               | PA4614 mscL            | -0,62           | 0,03            | 0,71             |
| PA0780 pruR            | 0,00            | ND              | ND               | PA2789 -               | -0,11           | ND              | ND               | PA4615 -               | -0,70           | 0,30            | 1,57             |
| PA0782 putA            | -3,29           | 1,79            | 8,38             | PA2790 -               | -0,75           | ND              | ND               | PA4616 -               | -2,84           | -2,29           | -3,68            |
| PA0783 putP            | -0,79           | 1,58            | 5,30             | PA2791 -               | -0,22           | ND              | ND               | PA4617 -               | -0,03           | 0,10            | 0,32             |
| PA0784 -               | -0,63           | ND              | ND               | PA2792 -               | -0,07           | ND              | ND               | PA4618 -               | -0,84           | -0,14           | 0,45             |
| PA0785 azoR1           | 0,00            | ND              | ND               | PA2793 -               | 0,02            | -0,23           | -0,67            | PA4619 -               | -1,38           | -0,48           | 0,03             |
| PA0787 -               | 0,22            | ND              | ND               | PA2794 -               | -0,54           | ND              | ND               | PA4620 -               | -1,74           | -0,98           | -1,05            |
| PA0789 -               | 0,38            | 0,86            | 2,08             | PA2795 -               | 0,00            | -0,20           | -0,57            | PA4621 -               | -1,66           | -0,53           | 0,16             |
| PA0790 -               | 0,24            | ND              | ND               | PA2796 tal             | -0,77           | -0,33           | -0,16            | PA4622 -               | 0,00            | ND              | ND               |
| PA0791 -               | 0,43            | ND              | ND               | PA2797 -               | 0,27            | -0,05           | -0,41            | PA4623 -               | 0,29            | ND              | ND               |
| PA0792 prpD            | 0,86            | ND              | ND               | PA2798 -               | 0,39            | -0,06           | -0,56            | PA4624 -               | 0,50            | ND              | ND               |
| PA0793 -               | 1,08            | ND              | ND               | PA2799 -               | -0,31           | ND              | ND               | PA4625 -               | 0,93            | ND              | ND               |
| PA0794 -               | 0,90            | 0,53            | 0,62             | PA2800 -               | -0,11           | -0,22           | -0,53            | PA4626 hprA            | -0,37           | -0,01           | 0,33             |
| PA0795 prpC            | 0,98            | 1,01            | 1,89             | PA2801 -               | -0,44           | ND              | ND               | PA4627 -               | -0,19           | -0,22           | -0,43            |
| PA0796 prpB            | 0,51            | 0,31            | 0,38             | PA2802 -               | -0,28           | ND              | ND               | PA4628 lysP            | -0,37           | 0,14            | 0,78             |
| PA0797 -               | 0,75            | ND              | ND               | PA2805 -               | -1,08           | -0,02           | 1,03             | PA4629 -               | 0,30            | ND              | ND               |
| PA0798 pmtA            | 0,00            | ND              | ND               | PA2806 -               | 0,24            | -0,12           | -0,58            | PA4630 -               | 0,32            | ND              | ND               |
| PA0799 -               | -0,36           | 0,17            | 0,85             | PA2808 ptrA            | 0,63            | ND              | ND               | PA4631 -               | 0,35            | 0,05            | -0,21            |
| PA0800 -               | 1,24            | ND              | ND               | PA2809 copR            | -0,42           | ND              | ND               | PA4632 -               | 0,12            | -0,06           | -0,29            |
| PA0801 -               | 0,40            | ND              | ND               | PA2810 copS            | 0,19            | ND              | ND               | PA4633 -               | -0,05           | 0,32            | 0,95             |
| PA0802 -               | 0,45            | ND              | ND               | PA2811 -               | -0,09           | ND              | ND               | PA4634 -               | -0,10           | ND              | ND               |

| ID – Gene <sup>a</sup> | TC <sup>b</sup> | PC <sup>c</sup> | PTV <sup>d</sup> | ID – Gene <sup>a</sup> | TC <sup>b</sup> | PC <sup>c</sup> | PTV <sup>d</sup> | ID – Gene <sup>a</sup> | TC <sup>b</sup> | PC <sup>c</sup> | PTV <sup>d</sup> |
|------------------------|-----------------|-----------------|------------------|------------------------|-----------------|-----------------|------------------|------------------------|-----------------|-----------------|------------------|
| PA0803 -               | 0,44            | ND              | ND               | PA2812 -               | 0,00            | -0,27           | -0,78            | PA4635 -               | -0,65           | ND              | ND               |
| PA0804 -               | -0,12           | ND              | ND               | PA2813 -               | -0,43           | -0,14           | 0,03             | PA4636 -               | 0,40            | 0,12            | -0,07            |
| PA0805 -               | -0,54           | ND              | ND               | PA2815 -               | -0,91           | -0,31           | 0,04             | PA4637 -               | 0,14            | ND              | ND               |
| PA0807                 |                 |                 |                  |                        |                 |                 |                  |                        |                 |                 |                  |
| ampDh3                 | -0,53           | ND              | ND               | PA2816 -               | -0,94           | ND              | ND               | PA4638 -               | 0,12            | ND              | ND               |
| PA0808 -               | 0,16            | ND              | ND               | PA2817 -               | -0,20           | -0,36           | -0,82            | PA4639 -               | 0,43            | 0,24            | 0,25             |
| PA0809 -               | -0,45           | ND              | ND               | PA2818 arr             | -0,06           | ND              | ND               | PA4640 mqoB            | -0,56           | -0,21           | -0,04            |
| PA0810 -               | -0,22           | ND              | ND               | PA2819 -               | 0,99            | ND              | ND               | PA4642 -               | 0,47            | 0,21            | 0,12             |
| PA0811 -               | -0,53           | ND              | ND               | PA2819.1 -             | 1,18            | ND              | ND               | PA4643 -               | 0,00            | ND              | ND               |
| PA0812 -               | -0,78           | ND              | ND               | PA2819.2 -             | 1,27            | ND              | ND               | PA4644 -               | -0,43           | -0,51           | -1,02            |
| PA0813 -               | -0,13           | ND              | ND               | PA2819.3 -             | 1,31            | ND              | ND               | PA4645 -               | -0,32           | -0,73           | -1,76            |
| PA0815 -               | -1,03           | ND              | ND               | PA2820 -               | -0,50           | -0,16           | 0,06             | PA4646 upp             | -0,05           | -0,01           | 0,03             |
| PA0816 -               | 0,20            | ND              | ND               | PA2821 -               | -0,37           | -0,37           | -0,69            | PA4647 uraA            | -0,14           | ND              | ND               |
| PA0817 -               | -0,55           | ND              | ND               | PA2822 -               | -0,35           | -0,05           | 0,20             | PA4655 hemH            | -0,08           | -0,13           | -0,30            |
| PA0818 -               | -0,93           | ND              | ND               | PA2823 -               | -0,49           | -0,22           | -0,14            | PA4656 -               | -0,07           | ND              | ND               |
| PA0819 -               | -0,58           | ND              | ND               | PA2824 -               | -0,58           | ND              | ND               | PA4657 -               | -0,33           | ND              | ND               |
| PA0820 -               | -0,14           | ND              | ND               | PA2825 ospR            | -0,31           | ND              | ND               | PA4658 -               | -0,14           | ND              | ND               |
| PA0821 -               | 0,20            | ND              | ND               | PA2826 -               | -0,72           | -0,16           | 0,26             | PA4659 -               | 0,00            | ND              | ND               |
| PA0822 -               | 0,12            | ND              | ND               | PA2827 -               | -0,76           | ND              | ND               | PA4660 phr             | -0,38           | ND              | ND               |
| PA0823 -               | 0,30            | ND              | ND               | PA2828 -               | 0,14            | 0,02            | -0,10            | PA4661 pagL            | -0,33           | -0,27           | -0,44            |
| PA0824 -               | 0,09            | ND              | ND               | PA2829 -               | 0,31            | -0,07           | -0,51            | PA4662 murl            | 0,42            | 0,24            | 0,27             |
| PA0826 -               | -0,06           | ND              | ND               | PA2830 htpX            | -0,01           | 0,09            | 0,27             | PA4663 moeB            | 0,27            | 0,07            | -0,07            |
| PA0826.1 -             | 0,48            | ND              | ND               | PA2831 -               | -0,87           | -0,47           | -0,46            | PA4664 hemK            | 0,23            | 0,18            | 0,29             |
| PA0826.2 ssrA          | 0,40            | ND              | ND               | PA2832 tpm             | -0,88           | ND              | ND               | PA4665 prfA            | 0,10            | 0,21            | 0,50             |
| PA0827 -               | -0,55           | ND              | ND               | PA2834 -               | -0,50           | ND              | ND               | PA4666 hemA            | 0,42            | 0,15            | 0,02             |
| PA0830 -               | -0,25           | ND              | ND               | PA2840 -               | -0,90           | -0,36           | -0,12            | PA4667 -               | 0,03            | 0,09            | 0,22             |
| PA0831 oruR            | -0,11           | ND              | ND               | PA2841 -               | -0,81           | ND              | ND               | PA4668 -               | -0,06           | 0,18            | 0,58             |
| PA0832 -               | -0,13           | -0,15           | -0,31            | PA2842 -               | -0,54           | ND              | ND               | PA4669 ipk             | 1,13            | 0,13            | -0,76            |
| PA0833 -               | 0,65            | 0,18            | -0,15            | PA2843 -               | -0,37           | -0,20           | -0,20            | PA4669.1 -             | 1,05            | ND              | ND               |
| PA0834 -               | 0,63            | 0,57            | 0,99             | PA2844 -               | -1,17           | ND              | ND               | PA4670 prs             | 0,77            | 0,29            | 0,04             |
| PA0835 pta             | 0,87            | -0,09           | -1,12            | PA2846 -               | -0,92           | ND              | ND               | PA4671 -               | -0,02           | -0,08           | -0,22            |
| PA0836 ackA            | 0,05            | -0,07           | -0,25            | PA2847 -               | -1,36           | ND              | ND               | PA4672 -               | 0,42            | 0,13            | -0,04            |
| PA0836.1 -             | -0,43           | ND              | ND               | PA2849 ohrR            | -0,49           | 0,34            | 1,46             | PA4673 -               | 0,42            | 0,09            | -0,17            |
| PA0837 slyD            | 0,09            | 0,22            | 0,55             | PA2850 ohr             | 0,00            | 1,61            | 4,58             | PA4673.1 -             | 3,70            | ND              | ND               |
| PA0838 -               | 0,25            | -0,01           | -0,28            | PA2851 efp             | -0,26           | -0,24           | -0,42            | PA4674 -               | 0,48            | ND              | ND               |
| PA0839 -               | -0,54           | ND              | ND               | PA2852 -               | 0,00            | ND              | ND               | PA4675 -               | -0,11           | 1,03            | 3,03             |
| PA0840 -               | -0,78           | 0,04            | 0,89             | PA2852.1 -             | 1,03            | ND              | ND               | PA4676 -               | -0,25           | -0,12           | -0,09            |
| PA0841 -               | 0,70            | ND              | ND               | PA2853 oprI            | -0,08           | -0,08           | -0,14            | PA4677 -               | -0,07           | ND              | ND               |
| PA0842 -               | 0,89            | ND              | ND               | PA2854 -               | -0,07           | -0,09           | -0,18            | PA4678 rimI            | 0,30            | ND              | ND               |
| PA0846 -               | 0,39            | ND              | ND               | PA2855 -               | -0,04           | ND              | ND               | PA4679 -               | 0,00            | -0,09           | -0,25            |
| PA0847 -               | -0,29           | ND              | ND               | PA2856 tesA            | -0,61           | -0,11           | 0,29             | PA4683 -               | 0,00            | ND              | ND               |
| PA0848 -               | 0,89            | 1,05            | 2,08             | PA2857 -               | -0,31           | 0,04            | 0,42             | PA4684 -               | 0,32            | 0,67            | 1,59             |
| PA0849 trxB2           | 0,90            | 0,73            | 1,17             | PA2858 -               | -0,44           | ND              | ND               | PA4685 -               | 3,62            | 1,67            | 1,11             |
| PA0850 -               | 0,58            | ND              | ND               | PA2859 greB            | 0,05            | 0,04            | 0,06             | PA4686 -               | 0,03            | 0,47            | 1,31             |
| PA0851 -               | 0,33            | 0,40            | 0,80             | PA2860 -               | -0,12           | ND              | ND               | PA4687 hitA            | 0,05            | 0,11            | 0,27             |
| PA0852 cbpD            | -0,48           | -0,29           | -0,35            | PA2862 lipA            | -1,87           | ND              | ND               | PA4688 hitB            | 0,23            | 0,16            | 0,22             |
| PA0853 -               | 0,03            | ND              | ND               | PA2864 -               | -0,69           | ND              | ND               | PA4689 -               | 0,00            | 0,08            | 0,23             |
| PA0854 fumC2           | 0,09            | -0,12           | -0,42            | PA2865 -               | -0,40           | ND              | ND               | PA4690.3 -             | 0,00            | ND              | ND               |
| PA0855 -               | -0,05           | ND              | ND               | PA2866 mttC            | 0,05            | -0,11           | -0,37            | PA4690.4 -             | 0,05            | ND              | ND               |
| PA0856 -               | 0,22            | 0,33            | 0,72             | PA2867 -               | -0,03           | 0,20            | 0,59             | PA4691 -               | -0,08           | ND              | ND               |
| PA0857 bolA            | 0,43            | 0,47            | 0,90             | PA2868 -               | 0,29            | ND              | ND               | PA4692 -               | -0,19           | ND              | ND               |
| PA0858 -               | 0,38            | 0,03            | -0,30            | PA2869 -               | -0,35           | ND              | ND               | PA4693 pssA            | 0,16            | ND              | ND               |
| PA0859 -               | 0,51            | ND              | ND               | PA2870 -               | -0,54           | ND              | ND               | PA4694 ilvC            | -0,45           | -0,22           | -0,19            |
| PA0860 -               | 0,37            | 0,22            | 0,26             | PA2871 -               | -0,47           | -0,18           | -0,04            | PA4695 ilvH            | -0,14           | -0,09           | -0,13            |
| PA0861 -               | -0,37           | ND              | ND               | PA2872 -               | -0,72           | ND              | ND               | PA4696 ilvI            | -0,19           | -0,10           | -0,11            |
| PA0862 -               | -0,46           | ND              | ND               | PA2873 -               | -1,22           | ND              | ND               | PA4697 -               | -1,21           | ND              | ND               |
| PA0863 -               | 0,29            | 0,12            | 0,06             | PA2874 -               | -1,13           | ND              | ND               | PA4698 -               | 0,20            | 0,42            | 1,00             |
| PA0865 hpd             | 2,46            | 2,53            | 4,73             | PA2875 -               | -0,68           | -0,58           | -0,96            | PA4699 -               | 0,04            | 0,07            | 0,14             |
| PA0866 aroP2           | 2,75            | ND              | ND               | PA2876 pyrF            | -0,04           | -0,09           | -0,23            | PA4700 mrcB            | 0,35            | 0,16            | 0,10             |
| PA0867 mliC            | 0,19            | 0,23            | 0,48             | PA2877 -               | -0,39           | ND              | ND               | PA4701 -               | -0,58           | -0,33           | -0,36            |
| PA0868 -               | 0,59            | ND              | ND               | PA2878 -               | 0,00            | ND              | ND               | PA4702 -               | 0,32            | ND              | ND               |
| PA0869 pbpG            | 0,68            | 0,95            | 2,03             | PA2879 -               | -0,81           | ND              | ND               | PA4704 cbpA            | -1,65           | ND              | ND               |
| PA0870 phhC            | 2,41            | 2,00            | 3,28             | PA2880 -               | -0,58           | ND              | ND               | PA4704.1 prrF1         | -0,10           | ND              | ND               |
| PA0871 phhB            | 2,14            | 2,16            | 4,02             | PA2883 -               | -1,01           | ND              | ND               | PA4704.2 prrF2         | 0,16            | ND              | ND               |
| PA0872 phhA            | 1,68            | 1,79            | 3,42             | PA2884 -               | 0,05            | ND              | ND               | PA4705 -               | 0,00            | ND              | ND               |
| PA0873 phhR            | -0,49           | 0,35            | 1,50             | PA2885 atuR            | -0,68           | -0,02           | 0,62             | PA4706 -               | 0,12            | ND              | ND               |
| PA0874 -               | 1,46            | ND              | ND               | PA2886 atuA            | 0,00            | ND              | ND               | PA4707 -               | 0,34            | ND              | ND               |
| PA0876 -               | 0,58            | 0,01            | -0,54            | PA2887 atuB            | 0,81            | ND              | ND               | PA4708 phuT            | 0,22            | 1,91            | 5,22             |
| PA0877 -               | 0,19            | ND              | ND               | PA2888 atuC            | 0,87            | ND              | ND               | PA4709 -               | 0,29            | 1,98            | 5,33             |
| PA0887 acsA            | -3,29           | -1,50           | -0,97            | PA2889 atuD            | 0,35            | ND              | ND               | PA4710 phuR            | -0,46           | 2,31            | 7,03             |
| PA0887.1 -             | -0,35           | ND              | ND               | PA2891 atuF            | ND              | -0,05           | ND               | PA4711 -               | 0,25            | ND              | ND               |
| PA0888 aotJ            | -0,08           | 0,03            | 0,18             | PA2893 atuH            | 0,00            | ND              | ND               | PA4712 -               | 0,17            | ND              | ND               |
| PA0889 aotQ            | -0,13           | -0,23           | -0,51            | PA2894 -               | -0,27           | ND              | ND               | PA4713 -               | -0,24           | ND              | ND               |
| PA0890 aotM            | -0,19           | -0,32           | -0,73            | PA2895 -               | 0,20            | ND              | ND               | PA4714 -               | -0,38           | ND              | ND               |
| PA0891 -               | -0,19           | -0,18           | -0,33            | PA2896 -               | -0,26           | ND              | ND               | PA4715 -               | 0,45            | 0,02            | -0,40            |
| PA0892 aotP            | -0,42           | -0,14           | 0,04             | PA2897 -               | -0,08           | 0,21            | 0,69             | PA4716 -               | -0,56           | ND              | ND               |

| ID – Gene <sup>a</sup> | TC <sup>b</sup> | PC <sup>c</sup> | PTV <sup>d</sup> | ID – Gene <sup>a</sup> | TC <sup>b</sup> | PC <sup>c</sup> | PTV <sup>d</sup> | ID – Gene <sup>a</sup> | TC <sup>b</sup> | PC <sup>c</sup> | PTV <sup>d</sup> |
|------------------------|-----------------|-----------------|------------------|------------------------|-----------------|-----------------|------------------|------------------------|-----------------|-----------------|------------------|
| PA0893 argR            | -0,18           | -0,08           | -0,06            | PA2899 -               | -0,50           | ND              | ND               | PA4717 -               | 0,07            | -0,10           | -0,37            |
| PA0894 -               | -0,54           | ND              | ND               | PA2900 -               | -0,08           | -0,25           | -0,62            | PA4718 -               | 0,18            | 0,24            | 0,51             |
| PA0895 aruC            | 0,15            | 0,33            | 0,79             | PA2901 -               | -0,17           | -0,17           | -0,30            | PA4719 -               | 0,05            | ND              | ND               |
| PA0896 aruF            | 0,47            | 0,08            | -0,26            | PA2902 -               | 0,00            | -0,05           | -0,15            | PA4720 trmA            | -0,18           | 0,02            | 0,23             |
| PA0897 aruG            | 0,20            | 0,18            | 0,32             | PA2903 cobJ            | 0,13            | 0,08            | 0,10             | PA4721 -               | 0,20            | ND              | ND               |
| PA0898 aruD            | 0,29            | 0,13            | 0,08             | PA2904 cobI            | -0,13           | 0,13            | 0,51             | PA4722 -               | -0,18           | -0,11           | -0,13            |
| PA0899 aruB            | 0,42            | 0,21            | 0,19             | PA2905 cobH            | 0,19            | 0,09            | 0,06             | PA4723 dksA            | -0,04           | -0,23           | -0,61            |
| PA0900 -               | 0,12            | ND              | ND               | PA2906 -               | 0,28            | 0,13            | 0,09             | PA4724 -               | -0,19           | -0,02           | 0,13             |
| PA0901 aruE            | 0,46            | 0,34            | 0,51             | PA2907 cobL            | -0,30           | -0,09           | 0,05             | PA4724.1 -             | 0,22            | ND              | ND               |
| PA0902 -               | -0,48           | -0,10           | 0,20             | PA2908 cbiD            | -0,19           | ND              | ND               | PA4725 cbrA            | -0,16           | ND              | ND               |
| PA0903 alaS            | 0,29            | 0,22            | 0,33             | PA2909 -               | -0,42           | ND              | ND               | PA4726 cbrB            | -0,34           | 0,03            | 0,41             |
| PA0904 lysC            | 0,27            | 0,12            | 0,08             | PA2911 -               | 0,09            | -0,28           | -0,88            | PA4726.1 -             | -0,31           | ND              | ND               |
| PA0905 rsmA            | 0,18            | -0,08           | -0,42            | PA2912 -               | 0,29            | ND              | ND               | PA4726.11 crcZ         | -8,22           | ND              | ND               |
| PA0905.1 -             | 1,77            | ND              | ND               | PA2915 -               | -0,81           | ND              | ND               | PA4727 pcnB            | 0,78            | 0,47            | 0,56             |
| PA0905.2 -             | 1,76            | ND              | ND               | PA2917 -               | 0,58            | ND              | ND               | PA4728 folK            | 0,64            | 0,46            | 0,68             |
| PA0905.3 -             | 1,69            | ND              | ND               | PA2918 -               | -0,78           | ND              | ND               | PA4729 panB            | 0,17            | -0,10           | -0,46            |
| PA0906 -               | -0,17           | ND              | ND               | PA2920 -               | -0,70           | ND              | ND               | PA4730 panC            | 0,20            | -0,13           | -0,57            |
| PA0907 -               | -0,47           | ND              | ND               | PA2921 -               | -0,52           | ND              | ND               | PA4731 panD            | 0,10            | ND              | ND               |
| PA0908 -               | 0,24            | ND              | ND               | PA2927 -               | 0,00            | ND              | ND               | PA4732 pgi             | -0,46           | -0,08           | 0,24             |
| PA0909 -               | -0,06           | ND              | ND               | PA2928 -               | -0,26           | ND              | ND               | PA4733 acsB            | -0,05           | ND              | ND               |
| PA0910 -               | 0,24            | ND              | ND               | PA2930 -               | -0,50           | ND              | ND               | PA4734 -               | -0,43           | ND              | ND               |
| PA0911 -               | -0,05           | ND              | ND               | PA2931 cifR            | 0,33            | ND              | ND               | PA4735 -               | -0,02           | -0,06           | -0,15            |
| PA0912 -               | -0,24           | ND              | ND               | PA2941 -               | 0,06            | ND              | ND               | PA4736 -               | -0,15           | ND              | ND               |
| PA0913 mgtE            | -0,05           | -0,42           | -1,14            | PA2942 -               | -0,40           | -0,18           | -0,11            | PA4737 -               | 0,38            | ND              | ND               |
| PA0914 -               | 0,03            | ND              | ND               | PA2942.1 -             | -0,21           | ND              | ND               | PA4738 -               | -0,76           | ND              | ND               |
| PA0915 -               | 0,45            | -0,17           | -0,92            | PA2943 -               | 0,11            | ND              | ND               | PA4739 -               | -0,71           | -0,15           | 0,28             |
| PA0916 -               | 0,25            | -0,04           | -0,37            | PA2944 cobN            | -0,28           | -0,02           | 0,23             | PA4740 pnp             | -0,51           | -0,05           | 0,37             |
| PA0917 kup             | 0,62            | 0,21            | -0,01            | PA2945 -               | -0,29           | -0,09           | 0,05             | PA4741 rpsO            | -0,24           | 0,14            | 0,64             |
| PA0918 -               | 0,17            | ND              | ND               | PA2946 -               | -0,64           | ND              | ND               | PA4742 truB            | 0,01            | -0,04           | -0,13            |
| PA0919 -               | 0,53            | 0,32            | 0,37             | PA2947 -               | -0,20           | ND              | ND               | PA4743 rbfA            | -0,04           | -0,06           | -0,12            |
| PA0920 -               | 0,62            | 0,42            | 0,57             | PA2948 cobM            | -0,65           | ND              | ND               | PA4744 infB            | -0,14           | -0,10           | -0,14            |
| PA0921 -               | 0,37            | ND              | ND               | PA2949 -               | -0,22           | -0,07           | 0,01             | PA4745 nusA            | -0,30           | -0,13           | -0,08            |
| PA0922 -               | 0,03            | ND              | ND               | PA2950 -               | 0,23            | -0,20           | -0,81            | PA4746 -               | 0,59            | 0,06            | -0,43            |
| PA0922.1 -             | 1,70            | ND              | ND               | PA2951 etfA            | -0,46           | -0,19           | -0,07            | PA4746.1 -             | 1,13            | ND              | ND               |
| PA0923 dinB            | 0,35            | ND              | ND               | PA2952 etfB            | -0,28           | -0,21           | -0,31            | PA4746.2 -             | 0,50            | ND              | ND               |
| PA0924 -               | 0,54            | ND              | ND               | PA2953 -               | -0,30           | -0,39           | -0,80            | PA4747 secG            | 0,37            | 0,22            | 0,27             |
| PA0925 -               | 0,28            | ND              | ND               | PA2954 -               | -0,19           | ND              | ND               | PA4748 tpiA            | 0,60            | 0,05            | -0,45            |
| PA0926 -               | 0,09            | 0,16            | 0,35             | PA2955 -               | 0,06            | ND              | ND               | PA4749 glmM            | 0,07            | 0,15            | 0,36             |
| PA0927 ldhA            | 0,35            | ND              | ND               | PA2956 -               | -0,11           | ND              | ND               | PA4750 folP            | 0,37            | 0,17            | 0,11             |
| PA0928 gacS            | 0,21            | 0,15            | 0,23             | PA2957 -               | 0,28            | -0,22           | -0,90            | PA4751 ftsH            | -0,09           | 0,08            | 0,32             |
| PA0929 -               | 0,25            | ND              | ND               | PA2958 -               | -0,28           | ND              | ND               | PA4752 ftsJ            | 0,14            | -0,26           | -0,88            |
| PA0930 -               | 0,27            | ND              | ND               | PA2958.1 rgsA          | -0,27           | ND              | ND               | PA4753 -               | -0,20           | -0,38           | -0,88            |
| PA0931 pirA            | 0,29            | 0,97            | 2,48             | PA2959 -               | -0,28           | -0,22           | -0,34            | PA4754 -               | -0,26           | ND              | ND               |
| PA0932 cysM            | 0,55            | 0,33            | 0,40             | PA2960 pilZ            | -0,12           | -0,46           | -1,18            | PA4755 greA            | -0,23           | -0,12           | -0,12            |
| PA0933 ygcA            | 0,45            | 0,37            | 0,59             | PA2961 holB            | -0,36           | -0,02           | 0,30             | PA4756 carB            | -0,28           | -0,30           | -0,58            |
| PA0934 relA            | 0,39            | 0,22            | 0,23             | PA2962 tmk             | -0,12           | -0,16           | -0,34            | PA4757 -               | 0,05            | ND              | ND               |
| PA0935 -               | 0,49            | 0,06            | -0,31            | PA2963 -               | 0,04            | -0,04           | -0,15            | PA4758 carA            | 0,00            | -0,23           | -0,64            |
| PA0936 lpxO2           | 0,57            | 0,44            | 0,67             | PA2964 pabC            | -0,19           | ND              | ND               | PA4758.1 -             | -0,09           | ND              | ND               |
| PA0937 -               | 0,55            | 0,18            | -0,04            | PA2965 fabF1           | -0,09           | -0,20           | -0,47            | PA4759 dapB            | 0,22            | -0,13           | -0,59            |
| PA0938 -               | 0,95            | 0,76            | 1,20             | PA2966 acpP            | 0,00            | 0,05            | 0,15             | PA4760 dnaJ            | 0,03            | -0,15           | -0,47            |
| PA0939 -               | 0,78            | ND              | ND               | PA2967 fabG            | 0,12            | -0,25           | -0,83            | PA4761 dnaK            | -0,10           | -0,17           | -0,38            |
| PA0940 -               | -0,64           | ND              | ND               | PA2968 fabD            | 0,47            | -0,26           | -1,19            | PA4762 grpE            | 0,02            | -0,06           | -0,21            |
| PA0941 -               | -1,30           | -0,56           | -0,29            | PA2969 plsX            | 0,16            | ND              | ND               | PA4763 recN            | -0,82           | -0,12           | 0,47             |
| PA0942 -               | -0,24           | -0,12           | -0,09            | PA2970 rpmF            | -0,09           | -0,03           | -0,01            | PA4764 fur             | -0,36           | 0,20            | 0,93             |
| PA0943 -               | 0,36            | 0,36            | 0,65             | PA2971 -               | 0,55            | 0,02            | -0,51            | PA4765 omlA            | 0,21            | -0,11           | -0,52            |
| PA0944 purN            | 0,52            | 0,33            | 0,43             | PA2972 -               | -0,03           | -0,14           | -0,37            | PA4766 -               | 0,30            | ND              | ND               |
| PA0945 purM            | 0,63            | 0,37            | 0,42             | PA2973 -               | 0,19            | -0,02           | -0,25            | PA4767 -               | 0,08            | -0,02           | -0,14            |
| PA0946 -               | 0,01            | -0,05           | -0,15            | PA2974 -               | 0,07            | -0,04           | -0,19            | PA4768 smpB            | 0,17            | 0,05            | -0,02            |
| PA0947 -               | 0,83            | 0,16            | -0,36            | PA2975 rluC            | 0,17            | 0,06            | -0,01            | PA4769 -               | -0,51           | -0,62           | -1,25            |
| PA0948 -               | 0,54            | ND              | ND               | PA2976 rne             | -0,48           | -0,18           | -0,02            | PA4770 lldP            | -1,76           | ND              | ND               |
| PA0949 wrbA            | 0,53            | 0,30            | 0,33             | PA2977 murB            | 0,00            | -0,08           | -0,23            | PA4771 lldD            | -1,13           | -1,36           | -2,74            |
| PA0950 -               | 0,69            | 0,47            | 0,66             | PA2978 ptpA            | 0,03            | -0,06           | -0,19            | PA4772 -               | -0,97           | -1,07           | -2,08            |
| PA0951 -               | 0,30            | ND              | ND               | PA2979 kdsB            | 0,18            | -0,22           | -0,82            | PA4773 -               | -0,12           | 0,16            | 0,57             |
| PA0952 -               | -0,38           | ND              | ND               | PA2980 -               | -0,02           | -0,09           | -0,24            | PA4774 -               | -0,16           | -0,69           | -1,80            |
| PA0953 -               | 0,00            | 0,09            | 0,26             | PA2981 lpxK            | -0,28           | ND              | ND               | PA4775 -               | 0,00            | ND              | ND               |
| PA0954 -               | 0,21            | ND              | ND               | PA2982 -               | -0,58           | -0,30           | -0,29            | PA4776 pmrA            | -0,13           | -0,06           | -0,03            |
| PA0955 -               | 0,42            | 0,40            | 0,73             | PA2983 -               | -0,17           | -0,74           | -1,93            | PA4777 pmrB            | 0,00            | ND              | ND               |
| PA0956 proS            | 0,43            | 0,44            | 0,81             | PA2985 -               | -0,75           | ND              | ND               | PA4778 cueR            | -0,08           | -0,30           | -0,78            |
| PA0957 -               | -0,03           | ND              | ND               | PA2986 -               | 0,07            | 0,10            | 0,20             | PA4779 -               | -0,09           | ND              | ND               |
| PA0958 oprD            | -0,31           | 0,14            | 0,71             | PA2987 -               | 0,03            | -0,19           | -0,58            | PA4780 -               | -0,52           | ND              | ND               |
| PA0959 -               | 0,72            | 0,31            | 0,16             | PA2988 -               | 0,33            | 0,06            | -0,15            | PA4781 -               | -0,13           | ND              | ND               |
| PA0960 -               | 0,60            | ND              | ND               | PA2989 -               | 0,13            | ND              | ND               | PA4782 -               | 0,33            | ND              | ND               |
| PA0961 -               | 0,61            | -0,02           | -0,66            | PA2990 -               | -0,89           | -0,33           | -0,06            | PA4783 -               | 0,68            | ND              | ND               |
| PA0962 -               | 0,17            | -0,02           | -0,22            | PA2991 sth             | -0,83           | -0,52           | -0,64            | PA4784 -               | -0,19           | ND              | ND               |
| PA0963 aspS            | 0,51            | 0,48            | 0,84             | PA2992 -               | -0,19           | ND              | ND               | PA4785 -               | ND              | -0,03           | ND               |
| PA0964 pmpR            | 0,21            | 0,36            | 0,81             | PA2993 -               | -0,18           | 0,14            | 0,59             | PA4786 -               | -0,54           | ND              | ND               |

| ID – Gene <sup>a</sup> | TC <sup>b</sup> | PC <sup>c</sup> | PTV <sup>d</sup> | ID – Gene <sup>a</sup> | TC <sup>b</sup> | PC <sup>c</sup> | PTV <sup>d</sup> | ID – Gene <sup>a</sup> | TC <sup>b</sup> | PC <sup>c</sup> | PTV <sup>d</sup> |
|------------------------|-----------------|-----------------|------------------|------------------------|-----------------|-----------------|------------------|------------------------|-----------------|-----------------|------------------|
| PA0965 ruvC            | 0,51            | ND              | ND               | PA2994 nqrF            | -0,07           | -0,11           | -0,25            | PA4787 -               | 0,03            | ND              | ND               |
| PA0966 ruvA            | 0,37            | 0,13            | -0,01            | PA2995 nqrE            | -0,14           | ND              | ND               | PA4789 -               | -0,18           | ND              | ND               |
| PA0967 ruvB            | 0,46            | 0,21            | 0,15             | PA2996 nqrD            | -0,20           | ND              | ND               | PA4790 -               | 0,19            | ND              | ND               |
| PA0968 -               | 0,98            | 0,23            | -0,33            | PA2997 nqrC            | -0,28           | -0,05           | 0,15             | PA4791 -               | 0,00            | ND              | ND               |
| PA0969 tolQ            | 0,41            | 1,03            | 2,52             | PA2998 nqrB            | -0,27           | ND              | ND               | PA4792 -               | 0,11            | ND              | ND               |
| PA0970 tolR            | 0,33            | 0,62            | 1,43             | PA2999 nqrA            | -0,13           | -0,13           | -0,25            | PA4793 -               | -1,29           | ND              | ND               |
| PA0971 tolA            | 0,63            | 0,54            | 0,90             | PA3000 aroP1           | -0,13           | ND              | ND               | PA4794 -               | -0,07           | ND              | ND               |
| PA0972 tolB            | 0,41            | 0,54            | 1,13             | PA3001 -               | -0,11           | -0,23           | -0,54            | PA4795 -               | 0,69            | ND              | ND               |
| PA0973 oprL            | 0,28            | 0,39            | 0,82             | PA3002 mfd             | -0,04           | 0,05            | 0,19             | PA4796 -               | 0,58            | ND              | ND               |
| PA0974 -               | 0,62            | 0,48            | 0,76             | PA3003 -               | 0,08            | 0,10            | 0,20             | PA4797 -               | -0,17           | ND              | ND               |
| PA0975 -               | 1,07            | 0,05            | -0,94            | PA3004 -               | -0,15           | -0,10           | -0,14            | PA4798 -               | -0,05           | ND              | ND               |
| PA0976 -               | 0,21            | 0,02            | -0,16            | PA3005 nagZ            | -0,29           | -0,34           | -0,68            | PA4799 -               | -0,24           | ND              | ND               |
| PA0976.1 -             | 1,41            | ND              | ND               | PA3006 psrA            | -0,54           | -0,31           | -0,34            | PA4800 -               | 0,36            | ND              | ND               |
| PA0977 -               | 1,21            | ND              | ND               | PA3007 lexA            | -1,01           | -0,03           | 0,93             | PA4801 -               | 0,15            | ND              | ND               |
| PA0978 -               | -0,11           | ND              | ND               | PA3008 -               | -0,65           | ND              | ND               | PA4802 -               | -0,13           | ND              | ND               |
| PA0979 -               | 0,22            | ND              | ND               | PA3009 -               | 0,42            | ND              | ND               | PA4802.1 -             | -0,13           | ND              | ND               |
| PA0980 -               | -0,24           | ND              | ND               | PA3010 -               | -0,28           | -0,12           | -0,08            | PA4803 -               | -1,00           | ND              | ND               |
| PA0981 -               | -0,47           | ND              | ND               | PA3011 topA            | -0,30           | -0,13           | -0,08            | PA4804 -               | -0,91           | ND              | ND               |
| PA0982 -               | -0,83           | ND              | ND               | PA3012 -               | -0,80           | 0,00            | 0,80             | PA4806 -               | -0,08           | ND              | ND               |
| PA0983 -               | 0,10            | ND              | ND               | PA3013 fobA            | -0,57           | -0,52           | -0,90            | PA4807 selB            | 0,08            | ND              | ND               |
| PA0984 -               | 0,47            | ND              | ND               | PA3014 fadA            | -0,71           | -0,62           | -1,04            | PA4808 selA            | -0,43           | -0,40           | -0,72            |
| PA0985 pyo55           | -0,63           | ND              | ND               | PA3015 -               | -0,95           | ND              | ND               | PA4809 fdhE            | 0,25            | -0,29           | -1,07            |
| PA0988 -               | -0,31           | ND              | ND               | PA3016 -               | 0,07            | ND              | ND               | PA4810 fdnI            | -0,08           | ND              | ND               |
| PA0989 -               | 0,25            | ND              | ND               | PA3017 -               | -0,39           | ND              | ND               | PA4811 fdnH            | 0,17            | ND              | ND               |
| PA0990 -               | 0,00            | ND              | ND               | PA3018 -               | 0,17            | ND              | ND               | PA4812 fdnG            | -0,11           | ND              | ND               |
| PA0991 -               | 0,10            | ND              | ND               | PA3019 -               | 0,01            | -0,19           | -0,55            | PA4815 -               | -0,21           | ND              | ND               |
| PA0992 cupC1           | -0,09           | ND              | ND               | PA3020 -               | -0,16           | -0,23           | -0,49            | PA4816 -               | -0,26           | ND              | ND               |
| PA0994 cupC3           | 0,00            | ND              | ND               | PA3021 -               | -0,16           | -0,25           | -0,56            | PA4821 -               | -0,36           | ND              | ND               |
| PA0995 ogt             | -1,09           | ND              | ND               | PA3022 -               | -0,13           | -0,21           | -0,46            | PA4826 -               | 0,11            | ND              | ND               |
| PA0996 pqsA            | -4,29           | ND              | ND               | PA3023 -               | -0,53           | ND              | ND               | PA4827 -               | -0,58           | ND              | ND               |
| PA0997 pqsB            | -4,46           | ND              | ND               | PA3024 -               | -0,58           | ND              | ND               | PA4829 lpd3            | -0,53           | ND              | ND               |
| PA0998 pqsC            | -3,37           | ND              | ND               | PA3025 -               | -0,46           | ND              | ND               | PA4830 -               | 0,19            | ND              | ND               |
| PA0999 pqsD            | -2,06           | ND              | ND               | PA3026 -               | -0,13           | ND              | ND               | PA4831 -               | -0,17           | ND              | ND               |
| PA1000 pqsE            | -0,96           | ND              | ND               | PA3027 -               | 0,07            | ND              | ND               | PA4832 -               | -0,28           | ND              | ND               |
| PA1001 phnA            | -1,00           | ND              | ND               | PA3028 moeA2           | -0,91           | -0,52           | -0,56            | PA4833 -               | -0,50           | ND              | ND               |
| PA1002 phnB            | -0,18           | ND              | ND               | PA3029 moaB2           | -0,91           | -0,45           | -0,38            | PA4838 -               | -0,26           | ND              | ND               |
| PA1003 mvfR            | 0,03            | ND              | ND               | PA3030 mobA            | -0,78           | ND              | ND               | PA4839 speA            | 0,76            | 0,32            | 0,14             |
| PA1004 nadA            | 0,56            | 0,20            | 0,01             | PA3031 -               | -0,65           | -0,36           | -0,37            | PA4840 -               | 1,11            | 0,11            | -0,79            |
| PA1005 -               | -0,05           | 0,11            | 0,36             | PA3033 -               | -0,26           | ND              | ND               | PA4841 -               | -0,13           | 0,13            | 0,50             |
| PA1006 -               | 0,72            | ND              | ND               | PA3034 -               | -0,54           | ND              | ND               | PA4842 -               | -0,27           | -0,27           | -0,49            |
| PA1007 -               | 0,91            | ND              | ND               | PA3035 -               | -0,13           | 0,05            | 0,26             | PA4843 -               | 0,19            | 0,48            | 1,18             |
| PA1008 bcp             | 0,25            | 0,34            | 0,73             | PA3036 -               | 0,00            | ND              | ND               | PA4845 dipZ            | -0,13           | -0,07           | -0,07            |
| PA1009 -               | 0,45            | 0,26            | 0,28             | PA3037 -               | -1,14           | ND              | ND               | PA4846 aroQ1           | 0,67            | 0,10            | -0,39            |
| PA1010 dapA            | 0,41            | 0,09            | -0,15            | PA3038 -               | -1,17           | ND              | ND               | PA4847 accB            | 0,12            | -0,11           | -0,43            |
| PA1011 -               | 0,40            | 0,30            | 0,45             | PA3040 -               | -0,74           | -0,18           | 0,23             | PA4848 accC            | 0,19            | -0,09           | -0,43            |
| PA1012 -               | 0,57            | ND              | ND               | PA3041 -               | -0,23           | ND              | ND               | PA4849 -               | 0,61            | ND              | ND               |
| PA1013 purC            | 0,23            | 0,25            | 0,49             | PA3042 -               | -0,49           | ND              | ND               | PA4850 prmA            | 0,19            | 0,02            | -0,15            |
| PA1013.1 -             | 0,84            | ND              | ND               | PA3043 -               | -1,00           | ND              | ND               | PA4851 -               | 0,09            | -0,08           | -0,33            |
| PA1014 -               | 0,58            | -0,12           | -0,91            | PA3046 -               | -0,40           | -0,20           | -0,16            | PA4852 -               | 0,35            | ND              | ND               |
| PA1015 -               | 0,07            | -0,15           | -0,49            | PA3047 -               | -0,41           | -0,15           | -0,02            | PA4853 fis             | 0,08            | -0,09           | -0,32            |
| PA1016 -               | 0,07            | ND              | ND               | PA3048 -               | -0,21           | -0,12           | -0,12            | PA4854 purH            | 0,04            | 0,31            | 0,84             |
| PA1020 -               | 0,12            | ND              | ND               | PA3049 rmf             | -0,35           | ND              | ND               | PA4855 purD            | 0,21            | 0,15            | 0,20             |
| PA1021 -               | 0,00            | ND              | ND               | PA3050 pyrD            | 0,03            | 0,00            | -0,02            | PA4856 retS            | 0,19            | 0,10            | 0,09             |
| PA1022 -               | 0,13            | ND              | ND               | PA3051 -               | -0,37           | ND              | ND               | PA4857 -               | -0,39           | ND              | ND               |
| PA1023 -               | 0,00            | 0,23            | 0,66             | PA3052 -               | -0,73           | ND              | ND               | PA4863 -               | -0,24           | ND              | ND               |
| PA1024 -               | 0,00            | ND              | ND               | PA3053 -               | -1,00           | -0,17           | 0,51             | PA4864 ureD            | -0,39           | ND              | ND               |
| PA1026 -               | 0,48            | ND              | ND               | PA3054 -               | 0,00            | ND              | ND               | PA4865 ureA            | -0,78           | ND              | ND               |
| PA1027 -               | -0,42           | ND              | ND               | PA3055 -               | -0,48           | ND              | ND               | PA4866 -               | -0,25           | ND              | ND               |
| PA1029 -               | -0,37           | -0,07           | 0,17             | PA3056 -               | -0,52           | -0,19           | -0,01            | PA4867 ureB            | 0,58            | ND              | ND               |
| PA1030 -               | 0,18            | ND              | ND               | PA3057 -               | 0,46            | ND              | ND               | PA4868 ureC            | -0,06           | ND              | ND               |
| PA1030.1 -             | 1,09            | ND              | ND               | PA3066 -               | -0,88           | ND              | ND               | PA4869 -               | -0,33           | ND              | ND               |
| PA1031 -               | 0,49            | 0,08            | -0,27            | PA3067 -               | 0,25            | ND              | ND               | PA4870 -               | -0,47           | ND              | ND               |
| PA1032 quiP            | 0,62            | 0,32            | 0,28             | PA3068 gdhB            | 0,01            | 0,17            | 0,46             | PA4871 -               | -0,47           | ND              | ND               |
| PA1033 -               | -0,25           | -0,05           | 0,11             | PA3069 -               | -0,87           | ND              | ND               | PA4872 -               | -0,68           | -0,12           | 0,33             |
| PA1034 -               | 0,53            | ND              | ND               | PA3070 -               | -0,29           | -0,25           | -0,43            | PA4873 -               | -0,39           | -0,70           | -1,61            |
| PA1035 -               | -0,39           | ND              | ND               | PA3071 -               | -0,23           | ND              | ND               | PA4874 -               | -0,60           | ND              | ND               |
| PA1036 -               | -0,88           | -0,37           | -0,17            | PA3072 -               | 0,00            | ND              | ND               | PA4875 -               | -0,09           | -0,25           | -0,62            |
| PA1037 -               | 0,45            | ND              | ND               | PA3073 -               | 0,00            | ND              | ND               | PA4876 osmE            | -0,49           | -0,29           | -0,34            |
| PA1038 -               | 0,19            | ND              | ND               | PA3074 -               | 0,14            | ND              | ND               | PA4878 -               | -0,53           | 0,41            | 1,69             |
| PA1039 -               | 0,20            | ND              | ND               | PA3075 -               | -0,21           | 0,05            | 0,36             | PA4879 -               | -0,21           | ND              | ND               |
| PA1040 -               | -0,10           | 0,26            | 0,84             | PA3076 -               | 0,20            | ND              | ND               | PA4880 -               | -0,43           | ND              | ND               |
| PA1041 -               | -0,32           | ND              | ND               | PA3077 -               | -0,06           | ND              | ND               | PA4881 -               | 0,00            | ND              | ND               |
| PA1042 -               | 0,28            | ND              | ND               | PA3078 -               | -0,06           | ND              | ND               | PA4885 irlR            | -0,84           | ND              | ND               |
| PA1043 -               | 0,29            | 0,07            | -0,09            | PA3079 -               | 0,05            | ND              | ND               | PA4886 -               | 0,13            | ND              | ND               |
| PA1044 -               | 0,16            | ND              | ND               | PA3080 -               | 0,00            | ND              | ND               | PA4887 -               | 0,81            | 0,25            | -0,11            |
| PA1045 -               | 0,29            | 0,17            | 0,20             | PA3081 -               | -1,24           | -0,53           | -0,27            | PA4888 desB            | -1,47           | ND              | ND               |

| ID – Gene <sup>a</sup> | TC <sup>b</sup> | PC <sup>c</sup> | PTV <sup>d</sup> | ID – Gene <sup>a</sup> | TC <sup>b</sup> | PC <sup>c</sup> | PTV <sup>d</sup> | ID – Gene <sup>a</sup> | TC <sup>b</sup> | PC <sup>c</sup> | PTV <sup>d</sup> |
|------------------------|-----------------|-----------------|------------------|------------------------|-----------------|-----------------|------------------|------------------------|-----------------|-----------------|------------------|
| PA1046 -               | 0,37            | ND              | ND               | PA3082 gbt             | -1,42           | -1,03           | -1,52            | PA4889 -               | -1,57           | -0,62           | -0,18            |
| PA1047 -               | 0,13            | 0,07            | 0,08             | PA3083 pepN            | -0,31           | -0,09           | 0,04             | PA4890 desT            | -0,47           | -0,18           | -0,05            |
| PA1048 -               | -0,02           | 0,18            | 0,53             | PA3084 -               | -0,01           | -0,20           | -0,56            | PA4891 ureE            | -1,09           | ND              | ND               |
| PA1049 pdxH            | 0,50            | 0,06            | -0,33            | PA3085 -               | -0,03           | ND              | ND               | PA4893 ureG            | -0,65           | ND              | ND               |
| PA1050 -               | 1,00            | ND              | ND               | PA3086 -               | -0,14           | ND              | ND               | PA4902 -               | -0,24           | ND              | ND               |
| PA1051 -               | -2,46           | 0,33            | 3,40             | PA3087 -               | 0,05            | ND              | ND               | PA4906 -               | -0,26           | ND              | ND               |
| PA1052 -               | -0,95           | 0,33            | 1,89             | PA3088 -               | -0,33           | -0,08           | 0,09             | PA4907 -               | 0,13            | -0,09           | -0,39            |
| PA1053 -               | 0,12            | 0,22            | 0,51             | PA3090 -               | -0,71           | ND              | ND               | PA4914 -               | -1,10           | ND              | ND               |
| PA1054 -               | 0,34            | ND              | ND               | PA3091 -               | -1,85           | ND              | ND               | PA4915 -               | -0,55           | ND              | ND               |
| PA1055 -               | 0,00            | ND              | ND               | PA3092 fadH1           | -1,00           | -0,33           | 0,06             | PA4916 -               | -1,10           | -0,09           | 0,83             |
| PA1056 -               | 0,20            | ND              | ND               | PA3093 -               | -0,13           | -0,14           | -0,26            | PA4917 -               | -2,18           | ND              | ND               |
| PA1057 -               | 0,34            | ND              | ND               | PA3094 -               | -0,46           | ND              | ND               | PA4918 -               | -3,41           | -0,17           | 2,91             |
| PA1058 -               | 0,47            | ND              | ND               | PA3094.1 -             | 1,50            | ND              | ND               | PA4919 pncB1           | -1,57           | -0,01           | 1,55             |
| PA1059 -               | 0,10            | ND              | ND               | PA3094.2 -             | 1,12            | ND              | ND               | PA4920 nadE            | -0,79           | 0,01            | 0,81             |
| PA1060 -               | 0,57            | ND              | ND               | PA3094.3 -             | 1,40            | ND              | ND               | PA4921 -               | -0,47           | ND              | ND               |
| PA1061 -               | 0,97            | 0,40            | 0,15             | PA3095 xcpZ            | -0,34           | ND              | ND               | PA4922 azu             | 0,23            | 0,11            | 0,07             |
| PA1062 -               | 0,91            | ND              | ND               | PA3096 xcpY            | -0,64           | ND              | ND               | PA4923 -               | -0,14           | -0,15           | -0,30            |
| PA1063 -               | 0,48            | ND              | ND               | PA3097 xcpX            | -0,43           | ND              | ND               | PA4924 -               | -0,33           | ND              | ND               |
| PA1064 -               | -0,08           | -0,03           | -0,01            | PA3098 xcpW            | -0,67           | ND              | ND               | PA4926 -               | -0,35           | ND              | ND               |
| PA1065 -               | 0,45            | ND              | ND               | PA3099 xcpV            | -0,68           | ND              | ND               | PA4928 -               | -0,04           | 0,11            | 0,36             |
| PA1066 -               | 0,45            | ND              | ND               | PA3100 xcpU            | -0,70           | ND              | ND               | PA4929 -               | -0,09           | ND              | ND               |
| PA1067 -               | -0,81           | ND              | ND               | PA3101 xcpT            | -0,62           | -0,68           | -1,30            | PA4930 alr             | -0,03           | -0,15           | -0,40            |
| PA1068 -               | -0,05           | -0,01           | 0,01             | PA3102 xcpS            | -0,67           | ND              | ND               | PA4931 dnaB            | -0,02           | -0,05           | -0,13            |
| PA1069 -               | 0,08            | -0,07           | -0,28            | PA3103 xcpR            | -0,68           | ND              | ND               | PA4932 rplI            | -0,27           | -0,08           | 0,04             |
| PA1070 braG            | 0,94            | 0,79            | 1,32             | PA3104 xcpP            | -0,37           | ND              | ND               | PA4933 -               | -0,29           | ND              | ND               |
| PA1071 braF            | 1,06            | 1,07            | 2,00             | PA3105 xcpQ            | 0,04            | -0,14           | -0,42            | PA4934 rpsR            | -0,37           | -0,15           | -0,05            |
| PA1072 braE            | 1,03            | ND              | ND               | PA3106 -               | 0,21            | 0,06            | -0,04            | PA4935 rpsF            | -0,31           | -0,07           | 0,12             |
| PA1073 braD            | 0,93            | ND              | ND               | PA3107 metZ            | 0,32            | 0,05            | -0,18            | PA4936 -               | -0,14           | 0,10            | 0,42             |
| PA1074 braC            | 0,96            | 1,47            | 3,21             | PA3108 purF            | 0,15            | 0,01            | -0,12            | PA4937 rnr             | -0,46           | 0,06            | 0,64             |
| PA1075 -               | 0,23            | 0,53            | 1,27             | PA3109 -               | 0,17            | ND              | ND               | PA4937.1 -             | 1,50            | ND              | ND               |
| PA1076 -               | 0,13            | 0,14            | 0,27             | PA3110 -               | -0,01           | -0,03           | -0,06            | PA4937.2 -             | 1,37            | ND              | ND               |
| PA1077 flgB            | 0,38            | ND              | ND               | PA3111 folC            | 0,22            | -0,01           | -0,25            | PA4938 purA            | -0,04           | 0,01            | 0,07             |
| PA1078 flgC            | 0,40            | ND              | ND               | PA3112 accD            | 0,46            | -0,26           | -1,20            | PA4939 -               | 0,18            | 0,18            | 0,32             |
| PA1079 flgD            | 0,01            | ND              | ND               | PA3113 trpF            | -0,50           | ND              | ND               | PA4940 -               | 0,42            | ND              | ND               |
| PA1080 flgE            | -0,09           | 0,06            | 0,26             | PA3114 truA            | -0,44           | -0,35           | -0,55            | PA4941 hflC            | -0,01           | 0,09            | 0,28             |
| PA1081 flgF            | 0,51            | ND              | ND               | PA3115 fimV            | -0,78           | -0,76           | -1,38            | PA4942 hflK            | 0,05            | 0,14            | 0,35             |
| PA1082 flgG            | -0,05           | ND              | ND               | PA3116 -               | 0,03            | -0,30           | -0,88            | PA4943 -               | -0,01           | -0,04           | -0,10            |
| PA1083 flgH            | 0,04            | 0,18            | 0,49             | PA3117 asd             | -0,44           | -0,22           | -0,20            | PA4944 hfq             | -0,23           | ND              | ND               |
| PA1084 flgI            | 0,24            | 0,11            | 0,08             | PA3118 leuB            | -0,56           | -0,28           | -0,24            | PA4945 miaA            | -0,10           | 0,19            | 0,65             |
| PA1085 flgJ            | 0,03            | ND              | ND               | PA3119 -               | 0,42            | ND              | ND               | PA4946 mutL            | 0,22            | 0,12            | 0,14             |
| PA1086 flgK            | -0,10           | 0,09            | 0,37             | PA3120 leuD            | -0,44           | -0,19           | -0,11            | PA4947 amiB            | 0,27            | 0,19            | 0,27             |
| PA1087 flgL            | 0,12            | 0,15            | 0,30             | PA3121 leuC            | -0,60           | -0,47           | -0,72            | PA4948 -               | 0,10            | 0,07            | 0,11             |
| PA1088 -               | 0,16            | ND              | ND               | PA3122 -               | -0,22           | ND              | ND               | PA4949 -               | 0,11            | 0,02            | -0,04            |
| PA1089 -               | 0,33            | 0,10            | -0,06            | PA3123 -               | -0,41           | ND              | ND               | PA4950 -               | -0,17           | ND              | ND               |
| PA1090 -               | 0,48            | ND              | ND               | PA3124 -               | -0,28           | ND              | ND               | PA4951 orn             | -0,30           | -0,07           | 0,11             |
| PA1091 fgtA            | 0,48            | 0,20            | 0,09             | PA3125 -               | -0,42           | ND              | ND               | PA4952 -               | 0,01            | -0,03           | -0,10            |
| PA1092 fliC            | 0,30            | 0,14            | 0,11             | PA3126 ibpA            | 0,46            | -0,30           | -1,31            | PA4953 motB            | -0,18           | 0,02            | 0,24             |
| PA1093 -               | 0,41            | 0,42            | 0,78             | PA3127 -               | -0,75           | ND              | ND               | PA4954 motA            | -0,25           | ND              | ND               |
| PA1094 fliD            | 0,41            | 0,29            | 0,42             | PA3128 -               | -0,37           | ND              | ND               | PA4955 -               | -0,44           | 0,34            | 1,40             |
| PA1095 -               | 0,26            | 0,27            | 0,51             | PA3129 -               | 0,04            | ND              | ND               | PA4956 rhdA            | 0,26            | -0,16           | -0,71            |
| PA1096 -               | 0,26            | -0,07           | -0,46            | PA3130 -               | -0,86           | ND              | ND               | PA4957 psd             | -0,01           | 0,18            | 0,52             |
| PA1097 fleQ            | -0,13           | 0,01            | 0,17             | PA3131 -               | -0,43           | -0,44           | -0,81            | PA4958 -               | -0,89           | -0,19           | 0,35             |
| PA1098 fleS            | 0,12            | ND              | ND               | PA3132 -               | 0,46            | ND              | ND               | PA4959 fimX            | -0,16           | -0,12           | -0,17            |
| PA1099 fleR            | -0,36           | -0,04           | 0,26             | PA3133 -               | -0,24           | ND              | ND               | PA4960 -               | 0,00            | -0,01           | -0,03            |
| PA1100 fliE            | 0,14            | ND              | ND               | PA3133.1 -             | 1,00            | ND              | ND               | PA4961 -               | -0,23           | -0,17           | -0,25            |
| PA1101 fliF            | -0,05           | -0,14           | -0,34            | PA3133.2 -             | 1,06            | ND              | ND               | PA4962 -               | -0,09           | ND              | ND               |
| PA1102 fliG            | 0,03            | -0,06           | -0,21            | PA3133.3 -             | 0,94            | ND              | ND               | PA4963 -               | 0,32            | 0,08            | -0,09            |
| PA1103 -               | 0,24            | 0,33            | 0,70             | PA3133.4 -             | 1,01            | ND              | ND               | PA4964 parC            | -0,44           | -0,22           | -0,20            |
| PA1104 fliI            | 0,36            | -0,02           | -0,41            | PA3134 gltX            | -0,26           | -0,28           | -0,53            | PA4965 -               | -0,42           | ND              | ND               |
| PA1105 fliJ            | -0,34           | ND              | ND               | PA3135 -               | -0,49           | ND              | ND               | PA4966 -               | -0,49           | -0,16           | 0,05             |
| PA1106 -               | -0,03           | ND              | ND               | PA3137 -               | -0,22           | ND              | ND               | PA4967 parE            | -0,32           | -0,22           | -0,30            |
| PA1109 -               | 0,00            | ND              | ND               | PA3138 uvrB            | -0,50           | -0,19           | -0,06            | PA4968 -               | -0,53           | -0,27           | -0,25            |
| PA1110 -               | 0,11            | ND              | ND               | PA3139 -               | 0,79            | 0,60            | 0,92             | PA4969 cpdA            | -0,98           | -0,59           | -0,71            |
| PA1112 -               | -0,13           | ND              | ND               | PA3139.1 -             | 0,95            | ND              | ND               | PA4970 -               | -0,09           | ND              | ND               |
| PA1112.1 -             | -0,49           | ND              | ND               | PA3140 -               | 0,09            | ND              | ND               | PA4971 aspP            | -0,17           | -0,19           | -0,38            |
| PA1113 -               | 0,13            | ND              | ND               | PA3141 wbpM            | -0,18           | -0,22           | -0,44            | PA4972 -               | 0,29            | 0,04            | -0,19            |
| PA1114 -               | 0,14            | ND              | ND               | PA3142 -               | -0,49           | ND              | ND               | PA4973 thiC            | -0,12           | 0,17            | 0,60             |
| PA1115 -               | -0,34           | ND              | ND               | PA3143 -               | 0,18            | ND              | ND               | PA4974 -               | -0,24           | -0,42           | -0,95            |
| PA1116 -               | 0,74            | 0,23            | -0,10            | PA3144 -               | 0,29            | ND              | ND               | PA4975 -               | 0,84            | 1,15            | 2,42             |
| PA1117 -               | 0,66            | 0,46            | 0,66             | PA3145 wbpL            | 0,41            | ND              | ND               | PA4976 aruH            | 1,09            | 0,63            | 0,71             |
| PA1118 -               | -0,25           | ND              | ND               | PA3146 wbpK            | 0,29            | 0,23            | 0,36             | PA4977 arul            | 1,81            | ND              | ND               |
| PA1119 yfiB            | 0,74            | 0,15            | -0,32            | PA3147 wbpJ            | 0,23            | 0,30            | 0,64             | PA4978 -               | 2,17            | ND              | ND               |
| PA1120 tpbB            | 0,42            | ND              | ND               | PA3148 wbpI            | 0,07            | 0,06            | 0,11             | PA4979 -               | 2,36            | ND              | ND               |
| PA1121 yfiR            | 0,40            | ND              | ND               | PA3149 wbpH            | 0,28            | 0,06            | -0,11            | PA4980 -               | 1,06            | ND              | ND               |
| PA1122 -               | 0,16            | 0,08            | 0,07             | PA3150 wbpG            | 0,20            | -0,15           | -0,61            | PA4982 -               | 1,14            | ND              | ND               |
| PA1123 -               | 0,98            | ND              | ND               | PA3151 hisF2           | 0,12            | 0,01            | -0,09            | PA4983 -               | 0,21            | ND              | ND               |

| ID – Gene <sup>a</sup> | TC <sup>b</sup> | PC <sup>c</sup> | PTV <sup>d</sup> | ID – Gene <sup>a</sup> | TC <sup>b</sup> | PC <sup>c</sup> | PTV <sup>d</sup> | ID – Gene <sup>a</sup> | TC <sup>b</sup> | PC <sup>c</sup> | PTV <sup>d</sup> |
|------------------------|-----------------|-----------------|------------------|------------------------|-----------------|-----------------|------------------|------------------------|-----------------|-----------------|------------------|
| PA1124 dgt             | -0,05           | ND              | ND               | PA3152 hisH2           | 0,32            | 0,12            | 0,02             | PA4984 -               | -0,78           | ND              | ND               |
| PA1125 -               | 0,37            | ND              | ND               | PA3153 wzx             | 0,20            | ND              | ND               | PA4985 -               | -0,83           | ND              | ND               |
| PA1126 -               | 0,40            | ND              | ND               | PA3154 wzy             | 0,38            | ND              | ND               | PA4986 -               | -0,64           | ND              | ND               |
| PA1127 -               | -0,45           | 0,27            | 1,22             | PA3155 wbpE            | -0,04           | 0,01            | 0,05             | PA4987 -               | 0,00            | ND              | ND               |
| PA1128 -               | -0,22           | ND              | ND               | PA3156 wbpD            | 0,05            | 0,00            | -0,06            | PA4988 waaA            | -0,08           | 0,01            | 0,10             |
| PA1129 -               | 0,39            | ND              | ND               | PA3157 -               | 0,07            | ND              | ND               | PA4989 -               | -0,64           | ND              | ND               |
| PA1130 rhlC            | 0,00            | ND              | ND               | PA3158 wbpB            | -0,19           | -0,26           | -0,55            | PA4990 -               | -1,25           | ND              | ND               |
| PA1132 -               | 0,79            | ND              | ND               | PA3159 wbpA            | -0,26           | -0,20           | -0,30            | PA4991 -               | -0,45           | 0,01            | 0,47             |
| PA1133 -               | 0,22            | ND              | ND               | PA3160 wzz             | 0,05            | -0,19           | -0,58            | PA4992 -               | -0,19           | 0,04            | 0,31             |
| PA1135 -               | -0,10           | 0,02            | 0,16             | PA3161 himD            | -0,71           | ND              | ND               | PA4993 -               | -0,31           | ND              | ND               |
| PA1136 -               | -0,78           | ND              | ND               | PA3162 rpsA            | -0,35           | -0,08           | 0,11             | PA4995 -               | -0,50           | ND              | ND               |
| PA1137 -               | ND              | 0,38            | ND               | PA3163 cmk             | -0,05           | 0,01            | 0,07             | PA4996 rfaE            | -0,36           | -0,20           | -0,21            |
| PA1138 -               | -0,74           | ND              | ND               | PA3165 hisC2           | -0,13           | -0,04           | 0,01             | PA4997 msbA            | -0,19           | -0,08           | -0,03            |
| PA1139 -               | -0,11           | ND              | ND               | PA3166 pheA            | -0,22           | -0,08           | -0,02            | PA4998 -               | -0,31           | -0,51           | -1,15            |
| PA1140 -               | 0,93            | 0,51            | 0,53             | PA3167 serC            | -0,12           | -0,14           | -0,28            | PA4999 waaL            | -0,01           | ND              | ND               |
| PA1141 -               | -0,14           | ND              | ND               | PA3168 gyrA            | -0,33           | -0,29           | -0,49            | PA5000 wapR            | 0,04            | 0,09            | 0,21             |
| PA1142 -               | -0,04           | ND              | ND               | PA3169 -               | -0,14           | -0,17           | -0,36            | PA5001 -               | 0,14            | 0,02            | -0,08            |
| PA1145 -               | 0,42            | ND              | ND               | PA3170 -               | -0,32           | -0,10           | 0,05             | PA5002 -               | 0,18            | -0,01           | -0,21            |
| PA1147 -               | 0,54            | ND              | ND               | PA3171 ubiG            | -0,36           | -0,08           | 0,13             | PA5003 -               | 0,00            | -0,08           | -0,23            |
| PA1150 pys2            | -0,35           | ND              | ND               | PA3172 -               | -0,22           | -0,14           | -0,18            | PA5004 -               | -0,06           | -0,11           | -0,26            |
| PA1151 imm2            | -0,16           | 0,15            | 0,59             | PA3173 -               | -0,32           | -0,08           | 0,08             | PA5005 -               | -0,15           | -0,17           | -0,32            |
| PA1152 -               | 0,54            | ND              | ND               | PA3177 -               | -0,66           | ND              | ND               | PA5006 -               | 0,20            | 0,28            | 0,60             |
| PA1153 -               | 0,12            | ND              | ND               | PA3178 -               | -0,25           | ND              | ND               | PA5007 -               | 0,07            | 0,10            | 0,20             |
| PA1154 -               | 0,24            | ND              | ND               | PA3179 -               | 0,03            | -0,23           | -0,68            | PA5008 -               | 0,06            | 0,11            | 0,25             |
| PA1155 nrdB            | 0,05            | 0,07            | 0,15             | PA3180 -               | 0,26            | ND              | ND               | PA5009 waaP            | 0,15            | 0,01            | -0,12            |
| PA1156 nrdA            | -0,28           | 0,04            | 0,38             | PA3181 -               | -0,29           | 1,60            | 4,84             | PA5010 waaG            | 0,10            | 0,06            | 0,06             |
| PA1157 -               | 0,78            | 0,50            | 0,63             | PA3182 pgl             | -0,64           | 1,71            | 5,53             | PA5011 waaC            | 0,11            | 0,14            | 0,29             |
| PA1158 -               | 0,70            | ND              | ND               | PA3183 zwf             | -1,18           | 1,63            | 5,83             | PA5012 waaF            | -0,11           | -0,04           | 0,00             |
| PA1159 -               | 0,49            | 0,75            | 1,63             | PA3184 -               | -0,22           | -0,12           | -0,12            | PA5013 ilvE            | -0,12           | -0,05           | -0,03            |
| PA1160 -               | 0,44            | 0,28            | 0,35             | PA3185 -               | -0,04           | -0,20           | -0,53            | PA5014 glnE            | 0,22            | 0,00            | -0,22            |
| PA1161 rrmA            | 0,35            | 0,34            | 0,62             | PA3186 oprB            | 2,35            | 2,76            | 5,50             | PA5015 aceE            | 0,50            | 0,56            | 1,09             |
| PA1162 dapE            | 0,30            | 0,33            | 0,62             | PA3187 -               | -0,22           | 2,29            | 6,75             | PA5016 aceF            | 0,64            | 0,49            | 0,75             |
| PA1163 ndvB            | 0,82            | ND              | ND               | PA3188 -               | -0,46           | 3,56            | 10,60            | PA5017 -               | -0,28           | ND              | ND               |
| PA1164 -               | 0,54            | ND              | ND               | PA3189 -               | ND              | 2,78            | ND               | PA5018 msrA            | -0,67           | -0,43           | -0,56            |
| PA1165 pcpS            | 0,41            | 0,17            | 0,09             | PA3190 -               | 0,20            | 2,92            | 8,10             | PA5019 -               | -0,05           | -0,29           | -0,77            |
| PA1167 -               | -0,22           | ND              | ND               | PA3191 -               | 0,56            | ND              | ND               | PA5020 -               | -1,85           | ND              | ND               |
| PA1170 -               | 1,18            | ND              | ND               | PA3192 gltR            | 0,06            | ND              | ND               | PA5021 -               | -0,06           | ND              | ND               |
| PA1171 -               | 0,43            | 0,18            | 0,08             | PA3193 glk             | 0,02            | 1,11            | 3,15             | PA5022 -               | 0,05            | 0,26            | 0,69             |
| PA1172 napC            | 0,31            | ND              | ND               | PA3194 edd             | -1,07           | 1,11            | 4,22             | PA5023 -               | -0,79           | 0,24            | 1,46             |
| PA1173 napB            | 0,46            | ND              | ND               | PA3195 gapA            | -0,10           | 2,08            | 6,02             | PA5024 -               | 1,64            | ND              | ND               |
| PA1177 napE            | -0,22           | ND              | ND               | PA3196 -               | 0,20            | ND              | ND               | PA5025 metY            | -0,31           | -0,23           | -0,34            |
| PA1178 oprH            | 0,10            | 0,13            | 0,28             | PA3197 -               | -0,13           | ND              | ND               | PA5026 -               | 0,00            | ND              | ND               |
| PA1179 phoP            | 0,07            | 0,14            | 0,32             | PA3198 -               | 0,00            | ND              | ND               | PA5027 -               | -1,28           | -0,20           | 0,71             |
| PA1180 phoQ            | 0,29            | 0,37            | 0,76             | PA3199 -               | -0,43           | -0,30           | -0,43            | PA5028 -               | -0,55           | ND              | ND               |
| PA1181 -               | 1,19            | 0,30            | -0,34            | PA3200 -               | -0,27           | ND              | ND               | PA5029 -               | -0,49           | ND              | ND               |
| PA1182 -               | 0,81            | ND              | ND               | PA3201 -               | -0,31           | ND              | ND               | PA5030 -               | 2,86            | ND              | ND               |
| PA1183 dctA            | ND              | -0,58           | ND               | PA3202 -               | -0,09           | ND              | ND               | PA5031 -               | 1,14            | ND              | ND               |
| PA1184 -               | -0,26           | ND              | ND               | PA3203 -               | -0,14           | ND              | ND               | PA5033 -               | -1,29           | ND              | ND               |
| PA1188 -               | 0,29            | ND              | ND               | PA3204 -               | -0,14           | ND              | ND               | PA5034 hemE            | 0,24            | 0,07            | -0,04            |
| PA1189 -               | 0,58            | ND              | ND               | PA3205 -               | 1,22            | ND              | ND               | PA5035 gltD            | -0,25           | -0,75           | -1,88            |
| PA1190 -               | 0,00            | ND              | ND               | PA3206 -               | -0,25           | ND              | ND               | PA5036 gltB            | -0,47           | -0,54           | -1,07            |
| PA1191 -               | -0,89           | ND              | ND               | PA3207 -               | -0,34           | ND              | ND               | PA5037 -               | 0,01            | -0,06           | -0,18            |
| PA1192 -               | 0,60            | 0,39            | 0,52             | PA3208 -               | -0,26           | -0,28           | -0,53            | PA5038 aroB            | -0,04           | -0,03           | -0,05            |
| PA1193 -               | 0,36            | 0,30            | 0,49             | PA3209 -               | 0,67            | ND              | ND               | PA5039 aroK            | -0,22           | ND              | ND               |
| PA1194 -               | 0,50            | ND              | ND               | PA3210 trkH            | -0,21           | ND              | ND               | PA5040 pilQ            | -0,77           | -0,46           | -0,54            |
| PA1196 -               | -0,38           | 0,32            | 1,30             | PA3211 -               | -0,42           | -0,24           | -0,27            | PA5041 pilP            | -1,07           | -0,04           | 0,97             |
| PA1197 -               | 0,54            | ND              | ND               | PA3212 -               | 0,06            | ND              | ND               | PA5042 pilO            | -1,11           | -0,97           | -1,64            |
| PA1198 -               | 0,45            | ND              | ND               | PA3213 -               | -0,18           | -0,13           | -0,19            | PA5043 pilN            | -1,28           | -1,03           | -1,65            |
| PA1199 -               | -0,73           | ND              | ND               | PA3214 -               | -0,17           | -0,13           | -0,19            | PA5044 pilM            | -1,48           | -0,88           | -1,02            |
| PA1200 -               | -0,63           | 0,08            | 0,86             | PA3215 -               | -0,09           | ND              | ND               | PA5045 ponA            | -0,16           | -0,01           | 0,14             |
| PA1201 -               | -0,10           | ND              | ND               | PA3216 -               | -0,58           | ND              | ND               | PA5046 -               | 0,44            | 0,42            | 0,75             |
| PA1202 -               | -0,55           | 0,25            | 1,27             | PA3217 cyaB            | 0,13            | ND              | ND               | PA5047 -               | 0,45            | 0,08            | -0,22            |
| PA1203 -               | -0,69           | -0,52           | -0,79            | PA3220 -               | -0,53           | ND              | ND               | PA5048 -               | 0,18            | ND              | ND               |
| PA1204 -               | -0,57           | ND              | ND               | PA3221 csaA            | 2,93            | 0,77            | -0,73            | PA5049 rpmE            | 0,13            | 0,05            | 0,01             |
| PA1205 -               | -0,40           | ND              | ND               | PA3222 -               | 3,50            | ND              | ND               | PA5050 priA            | -0,09           | 0,44            | 1,34             |
| PA1206 -               | 0,28            | -0,39           | -1,39            | PA3223 azoR3           | 2,21            | ND              | ND               | PA5051 argS            | -0,13           | -0,08           | -0,09            |
| PA1207 kefB            | 0,19            | -0,10           | -0,47            | PA3224 -               | -0,14           | ND              | ND               | PA5052 -               | 0,01            | 0,20            | 0,57             |
| PA1208 -               | 0,10            | ND              | ND               | PA3225 -               | 0,00            | -0,19           | -0,55            | PA5053 hslV            | 0,15            | -0,36           | -1,18            |
| PA1209 -               | -0,35           | ND              | ND               | PA3226 -               | 0,09            | -0,16           | -0,55            | PA5054 hslU            | 0,00            | -0,17           | -0,48            |
| PA1222 -               | 0,50            | 0,34            | 0,47             | PA3227 ppiA            | -0,10           | 0,19            | 0,64             | PA5055 -               | -0,11           | 0,16            | 0,56             |
| PA1223 -               | -0,34           | ND              | ND               | PA3228 -               | 0,41            | 0,56            | 1,17             | PA5056 phaC1           | -0,21           | ND              | ND               |
| PA1224 -               | -0,25           | ND              | ND               | PA3229 -               | -0,29           | ND              | ND               | PA5057 phaD            | -0,35           | ND              | ND               |
| PA1225 -               | -0,33           | -0,07           | 0,15             | PA3230 -               | -0,21           | ND              | ND               | PA5058 phaC2           | -0,58           | ND              | ND               |
| PA1226 -               | -0,05           | 0,02            | 0,10             | PA3232 -               | -0,87           | ND              | ND               | PA5059 -               | -0,18           | ND              | ND               |
| PA1227 -               | -0,42           | ND              | ND               | PA3233 -               | -1,26           | ND              | ND               | PA5060 phaF            | -0,62           | -0,45           | -0,68            |
| PA1228 -               | -0,28           | -0,38           | -0,81            | PA3234 -               | -2,04           | ND              | ND               | PA5061 -               | -0,39           | ND              | ND               |

| ID – Gene <sup>a</sup> | TC <sup>b</sup> | PC <sup>c</sup> | PTV <sup>d</sup> | ID – Gene <sup>a</sup> | TC <sup>b</sup> | PC <sup>c</sup> | PTV <sup>d</sup> | ID – Gene <sup>a</sup> | TC <sup>b</sup> | PC <sup>c</sup> | PTV <sup>d</sup> |
|------------------------|-----------------|-----------------|------------------|------------------------|-----------------|-----------------|------------------|------------------------|-----------------|-----------------|------------------|
| PA1229 -               | -0,42           | ND              | ND               | PA3235 -               | <b>-2,78</b>    | ND              | ND               | PA5062 -               | -0,84           | ND              | ND               |
| PA1233 -               | 0,22            | ND              | ND               | PA3238 -               | -0,87           | -0,20           | 0,28             | PA5063 ubiE            | -0,28           | -0,21           | -0,32            |
| PA1234 -               | 0,10            | ND              | ND               | PA3239 -               | -0,62           | ND              | ND               | PA5064 -               | -0,35           | -0,06           | 0,17             |
| PA1235 -               | -0,49           | ND              | ND               | PA3240 -               | -0,95           | ND              | ND               | PA5065 ubiB            | 0,00            | 0,00            | 0,00             |
| PA1241 -               | 0,00            | ND              | ND               | PA3241 -               | -0,22           | ND              | ND               | PA5066 hisI            | -0,42           | ND              | ND               |
| PA1243 -               | 0,54            | 0,12            | -0,21            | PA3242 -               | 0,18            | -0,06           | -0,35            | PA5067 hisE            | -0,01           | 0,05            | 0,16             |
| PA1244 -               | 0,55            | 0,15            | -0,12            | PA3243 minC            | -0,75           | -0,29           | -0,09            | PA5068 tatA            | -0,12           | ND              | ND               |
| PA1245 -               | <b>-1,27</b>    | ND              | ND               | PA3244 minD            | -0,20           | -0,34           | -0,77            | PA5069 tatB            | 0,07            | ND              | ND               |
| PA1247 aprE            | <b>-1,46</b>    | ND              | ND               | PA3245 minE            | -0,32           | -0,35           | -0,69            | PA5070 tatC            | 0,39            | ND              | ND               |
| PA1249 aprA            | -0,45           | ND              | ND               | PA3246 rluA            | 0,09            | 0,06            | 0,08             | PA5071 -               | 0,23            | 0,07            | -0,02            |
| PA1250 aprI            | 0,36            | 0,24            | 0,32             | PA3247 -               | -0,39           | 0,08            | 0,62             | PA5072 -               | -0,06           | -0,08           | -0,15            |
| PA1251 -               | 0,19            | ND              | ND               | PA3248 -               | -0,72           | ND              | ND               | PA5073 -               | -0,13           | ND              | ND               |
| PA1263 -               | 0,21            | ND              | ND               | PA3254 -               | -0,28           | ND              | ND               | PA5074 -               | -0,15           | 0,08            | 0,37             |
| PA1264 -               | 0,65            | ND              | ND               | PA3255 -               | -0,88           | -0,16           | 0,42             | PA5075 -               | 0,01            | -0,05           | -0,16            |
| PA1269 -               | 0,03            | ND              | ND               | PA3256 -               | -0,76           | -0,27           | -0,01            | PA5076 -               | 0,14            | -0,05           | -0,27            |
| PA1271 -               | 0,74            | 0,14            | -0,36            | PA3257 prc             | -0,71           | -0,24           | 0,02             | PA5077 mdoH            | -0,12           | -0,04           | -0,01            |
| PA1272 cobO            | 0,60            | 0,24            | 0,08             | PA3258 -               | -0,24           | ND              | ND               | PA5078 -               | -0,20           | -0,18           | -0,31            |
| PA1273 cobB            | 0,43            | 0,27            | 0,35             | PA3259 -               | -0,58           | ND              | ND               | PA5079 -               | -0,03           | -0,04           | -0,08            |
| PA1274 -               | 0,70            | ND              | ND               | PA3260 -               | -0,55           | -0,15           | 0,13             | PA5080 -               | 0,09            | 0,01            | -0,07            |
| PA1275 cobD            | 0,57            | 0,20            | -0,01            | PA3261 -               | -0,31           | ND              | ND               | PA5081 -               | -0,18           | ND              | ND               |
| PA1276 cobC            | 0,66            | 0,42            | 0,55             | PA3262 -               | -0,31           | -0,29           | -0,50            | PA5082 -               | 0,07            | ND              | ND               |
| PA1277 cobQ            | 0,60            | 0,16            | -0,13            | PA3262.1 -             | <b>1,28</b>     | ND              | ND               | PA5083 -               | 0,00            | ND              | ND               |
| PA1278 cobP            | 0,70            | 0,29            | 0,13             | PA3262.2 -             | <b>1,49</b>     | ND              | ND               | PA5085 -               | -0,70           | ND              | ND               |
| PA1279 cobU            | 0,51            | 0,22            | 0,12             | PA3263 -               | -0,64           | -0,54           | -0,89            | PA5086 -               | -0,19           | ND              | ND               |
| PA1280 -               | 0,65            | ND              | ND               | PA3264 -               | -0,40           | ND              | ND               | PA5087 -               | -0,16           | ND              | ND               |
| PA1281 cobV            | 0,51            | ND              | ND               | PA3265 -               | 0,23            | ND              | ND               | PA5088 -               | -0,28           | ND              | ND               |
| PA1282 -               | 0,00            | ND              | ND               | PA3266 capB            | -0,73           | -0,35           | -0,26            | PA5091 hutG            | -0,42           | ND              | ND               |
| PA1283 -               | -0,21           | 0,08            | 0,44             | PA3267 -               | -0,09           | -0,08           | -0,14            | PA5092 hutI            | -0,35           | ND              | ND               |
| PA1285 -               | 0,27            | -0,14           | -0,68            | PA3268 -               | -0,06           | 0,46            | <b>1,36</b>      | PA5094 -               | -0,65           | ND              | ND               |
| PA1286 -               | 0,29            | ND              | ND               | PA3269 -               | -0,78           | ND              | ND               | PA5095 -               | -0,65           | ND              | ND               |
| PA1287 -               | -0,26           | 0,10            | 0,54             | PA3270 -               | -0,78           | -0,31           | -0,10            | PA5103 -               | -0,46           | ND              | ND               |
| PA1288 -               | -0,13           | 0,57            | <b>1,74</b>      | PA3271 -               | <b>-2,75</b>    | -0,32           | <b>1,85</b>      | PA5104 -               | 0,06            | ND              | ND               |
| PA1289 -               | -0,83           | ND              | ND               | PA3272 -               | -0,42           | ND              | ND               | PA5105 hutC            | -0,36           | -0,03           | 0,29             |
| PA1290 -               | 0,26            | ND              | ND               | PA3274 -               | <b>-1,28</b>    | ND              | ND               | PA5106 -               | <b>-1,14</b>    | ND              | ND               |
| PA1291 -               | -0,11           | ND              | ND               | PA3276 -               | -0,21           | ND              | ND               | PA5107 blc             | 0,03            | ND              | ND               |
| PA1292 -               | 0,00            | 0,07            | 0,21             | PA3277 -               | -0,87           | ND              | ND               | PA5108 -               | -0,02           | -0,12           | -0,33            |
| PA1293 -               | -0,19           | 0,04            | 0,31             | PA3278 -               | <b>-1,19</b>    | ND              | ND               | PA5109 -               | -0,31           | ND              | ND               |
| PA1294 rnd             | 0,40            | 0,19            | 0,14             | PA3281 -               | -0,46           | ND              | ND               | PA5110 fbp             | 0,00            | -0,01           | -0,04            |
| PA1295 -               | 0,43            | 0,39            | 0,67             | PA3283 -               | -0,58           | ND              | ND               | PA5111 gloA3           | 0,08            | -0,02           | -0,14            |
| PA1296 -               | 0,44            | ND              | ND               | PA3284 -               | <b>-1,03</b>    | ND              | ND               | PA5112 estA            | 0,37            | 0,78            | <b>1,86</b>      |
| PA1297 -               | 0,36            | ND              | ND               | PA3285 -               | -0,22           | ND              | ND               | PA5113 -               | 0,00            | -0,13           | -0,37            |
| PA1298 -               | -0,17           | ND              | ND               | PA3286 -               | -0,08           | -0,48           | <b>-1,28</b>     | PA5114 -               | 0,02            | ND              | ND               |
| PA1299 -               | 0,84            | ND              | ND               | PA3287 -               | -0,34           | ND              | ND               | PA5115 -               | <b>-1,14</b>    | ND              | ND               |
| PA1300 -               | <b>1,17</b>     | ND              | ND               | PA3288 -               | 0,07            | ND              | ND               | PA5116 -               | <b>-1,58</b>    | ND              | ND               |
| PA1301 -               | 0,28            | ND              | ND               | PA3289 -               | -0,22           | ND              | ND               | PA5117 typA            | -0,44           | 0,01            | 0,46             |
| PA1303 -               | 0,39            | ND              | ND               | PA3290 -               | -0,13           | ND              | ND               | PA5118 thil            | 0,20            | 0,03            | -0,12            |
| PA1304 -               | 0,44            | 0,33            | 0,51             | PA3291 -               | -0,42           | ND              | ND               | PA5119 glnA            | 0,24            | 0,14            | 0,16             |
| PA1305 -               | 0,50            | ND              | ND               | PA3293 -               | 0,00            | ND              | ND               | PA5120 -               | 0,28            | ND              | ND               |
| PA1306 -               | 0,34            | ND              | ND               | PA3294 -               | -0,08           | ND              | ND               | PA5121 -               | 0,38            | -0,16           | -0,85            |
| PA1307 -               | 0,14            | 0,24            | 0,56             | PA3295 -               | -0,94           | -0,47           | -0,39            | PA5122 -               | <b>-1,35</b>    | ND              | ND               |
| PA1308 -               | 0,39            | ND              | ND               | PA3297 -               | -0,17           | -0,16           | -0,30            | PA5123 -               | <b>-1,03</b>    | -0,32           | 0,13             |
| PA1309 -               | -0,37           | ND              | ND               | PA3299 fadD1           | -0,56           | -0,28           | -0,23            | PA5124 ntrB            | 0,33            | ND              | ND               |
| PA1312 -               | -0,24           | ND              | ND               | PA3300 fadD2           | 0,20            | ND              | ND               | PA5125 ntrC            | -0,05           | -0,16           | -0,40            |
| PA1314 -               | 0,09            | ND              | ND               | PA3301 -               | -0,39           | ND              | ND               | PA5126 -               | -0,29           | ND              | ND               |
| PA1315 -               | -0,47           | 0,14            | 0,86             | PA3302 -               | -0,59           | -0,36           | -0,44            | PA5127 -               | 0,42            | -0,03           | -0,50            |
| PA1316 -               | 0,00            | ND              | ND               | PA3304 -               | 0,45            | ND              | ND               | PA5128 secB            | -0,35           | -0,08           | 0,12             |
| PA1317 cyoA            | <b>-2,90</b>    | ND              | ND               | PA3304.1 -             | -0,49           | ND              | ND               | PA5129 grx             | -0,30           | 0,18            | 0,81             |
| PA1318 cyoB            | <b>-3,15</b>    | ND              | ND               | PA3305 -               | -0,49           | ND              | ND               | PA5130 -               | 0,22            | -0,02           | -0,29            |
| PA1319 cyoC            | <b>-3,54</b>    | ND              | ND               | PA3305.1 phrS          | -0,56           | ND              | ND               | PA5131 pgm             | -0,09           | -0,19           | -0,45            |
| PA1320 cyoD            | <b>-2,56</b>    | ND              | ND               | PA3306 -               | -0,40           | ND              | ND               | PA5132 -               | 0,55            | ND              | ND               |
| PA1321 cyoE            | <b>-2,63</b>    | ND              | ND               | PA3307 -               | <b>-1,28</b>    | ND              | ND               | PA5133 -               | 0,01            | 0,14            | 0,37             |
| PA1323 -               | 0,00            | ND              | ND               | PA3308 hepA            | -0,20           | -0,13           | -0,17            | PA5134 -               | -0,21           | -0,09           | -0,04            |
| PA1324 -               | -0,13           | -0,11           | -0,18            | PA3309 -               | 0,20            | -0,35           | <b>-1,20</b>     | PA5135 -               | 0,02            | 0,21            | 0,59             |
| PA1324.1 -             | -0,37           | ND              | ND               | PA3310 -               | 0,24            | 0,06            | -0,06            | PA5136 -               | 0,02            | 0,08            | 0,21             |
| PA1325 -               | -0,78           | ND              | ND               | PA3312 -               | -0,29           | -0,12           | -0,04            | PA5137 -               | -0,29           | ND              | ND               |
| PA1326 ilvA2           | <b>-1,00</b>    | ND              | ND               | PA3313 -               | -0,17           | -0,28           | -0,63            | PA5138 -               | -0,67           | 0,03            | 0,75             |
| PA1328 -               | -0,93           | ND              | ND               | PA3314 -               | -0,33           | 0,06            | 0,50             | PA5139 -               | <b>-1,39</b>    | -0,99           | <b>-1,42</b>     |
| PA1330 -               | -0,21           | -0,10           | -0,07            | PA3315 -               | 0,19            | ND              | ND               | PA5140 hisF1           | -0,14           | 0,01            | 0,16             |
| PA1331 -               | 0,48            | ND              | ND               | PA3316 -               | 0,00            | ND              | ND               | PA5141 hisA            | -0,01           | -0,03           | -0,07            |
| PA1332 -               | -0,76           | ND              | ND               | PA3317 -               | -0,47           | ND              | ND               | PA5142 hisH1           | -0,12           | 0,11            | 0,43             |
| PA1333 -               | <b>-2,00</b>    | ND              | ND               | PA3321 -               | 0,00            | ND              | ND               | PA5143 hisB            | -0,07           | 0,01            | 0,11             |
| PA1335 -               | 0,51            | 0,01            | -0,48            | PA3322 -               | -0,30           | 0,01            | 0,32             | PA5144 -               | 0,58            | ND              | ND               |
| PA1336 -               | 0,27            | ND              | ND               | PA3325 -               | -0,91           | ND              | ND               | PA5145 -               | -0,37           | ND              | ND               |
| PA1337 ansB            | <b>1,36</b>     | 0,37            | -0,31            | PA3326 -               | <b>-1,90</b>    | -0,39           | 0,78             | PA5146 -               | 0,00            | -0,06           | -0,16            |
| PA1338 ggt             | 0,46            | 0,86            | <b>2,00</b>      | PA3331 -               | <b>-2,58</b>    | ND              | ND               | PA5147 mutY            | 0,03            | 0,00            | -0,02            |
| PA1339 -               | 0,04            | 0,04            | 0,07             | PA3332 -               | <b>-2,81</b>    | ND              | ND               | PA5148 -               | -0,17           | -0,20           | -0,40            |

| ID – Gene <sup>a</sup> | TC <sup>b</sup> | PC <sup>c</sup> | PTV <sup>d</sup> | ID – Gene <sup>a</sup> | TC <sup>b</sup> | PC <sup>c</sup> | PTV <sup>d</sup> | ID – Gene <sup>a</sup> | TC <sup>b</sup> | PC <sup>c</sup> | PTV <sup>d</sup> |
|------------------------|-----------------|-----------------|------------------|------------------------|-----------------|-----------------|------------------|------------------------|-----------------|-----------------|------------------|
| PA1340 -               | 0,03            | ND              | ND               | PA3333 fabH2           | <b>-2,46</b>    | ND              | ND               | PA5149 -               | -0,25           | ND              | ND               |
| PA1341 -               | 0,11            | -0,06           | -0,28            | PA3334 -               | <b>-4,39</b>    | ND              | ND               | PA5149.1 -             | 0,74            | ND              | ND               |
| PA1342 -               | 0,08            | 0,08            | 0,15             | PA3336 -               | -0,65           | ND              | ND               | PA5150 -               | -0,26           | ND              | ND               |
| PA1343 -               | 0,29            | ND              | ND               | PA3337 rfaD            | -0,89           | -0,25           | 0,17             | PA5151 -               | -0,21           | ND              | ND               |
| PA1344 -               | 0,11            | -0,01           | -0,12            | PA3338 -               | -0,87           | ND              | ND               | PA5152 -               | -0,09           | <b>1,20</b>     | <b>3,51</b>      |
| PA1357 -               | -0,24           | 0,07            | 0,44             | PA3339 plpD            | 0,00            | ND              | ND               | PA5153 -               | 0,80            | <b>1,32</b>     | <b>2,95</b>      |
| PA1358 -               | 0,04            | ND              | ND               | PA3340 -               | -0,15           | 0,37            | <b>1,19</b>      | PA5154 -               | <b>1,37</b>     | 0,79            | 0,87             |
| PA1359 -               | 0,53            | ND              | ND               | PA3341 -               | <b>-1,06</b>    | 0,11            | <b>1,38</b>      | PA5155 -               | <b>1,22</b>     | ND              | ND               |
| PA1360 -               | 0,17            | ND              | ND               | PA3342 -               | -0,81           | ND              | ND               | PA5156 -               | -0,13           | ND              | ND               |
| PA1361 -               | 0,30            | ND              | ND               | PA3343 -               | -0,96           | ND              | ND               | PA5157 -               | 0,22            | ND              | ND               |
| PA1362 -               | -0,29           | ND              | ND               | PA3344 recQ            | -0,03           | -0,15           | -0,40            | PA5158 -               | 0,22            | 0,20            | 0,35             |
| PA1363 -               | 0,95            | ND              | ND               | PA3345 -               | 0,26            | -0,12           | -0,61            | PA5159 -               | 0,23            | ND              | ND               |
| PA1364 -               | 0,39            | ND              | ND               | PA3346 -               | -0,79           | ND              | ND               | PA5160 -               | 0,63            | ND              | ND               |
| PA1365 -               | 0,39            | 0,38            | 0,69             | PA3347 -               | <b>-1,03</b>    | ND              | ND               | PA5160.1 -             | <b>2,04</b>     | ND              | ND               |
| PA1366 -               | -0,27           | ND              | ND               | PA3348 -               | -0,20           | -0,03           | 0,11             | PA5161 rmlB            | -0,30           | -0,19           | -0,25            |
| PA1367 -               | 0,22            | 0,18            | 0,30             | PA3349 -               | -0,20           | -0,24           | -0,50            | PA5162 rmlD            | -0,29           | -0,12           | -0,06            |
| PA1368 -               | -0,26           | ND              | ND               | PA3350 -               | -0,64           | -0,21           | 0,04             | PA5163 rmlA            | -0,31           | -0,23           | -0,34            |
| PA1369 -               | -0,25           | ND              | ND               | PA3351 flgM            | -0,53           | 0,14            | 0,93             | PA5164 rmlC            | -0,24           | -0,14           | -0,17            |
| PA1370 -               | 0,10            | ND              | ND               | PA3352 -               | -0,30           | -0,10           | 0,03             | PA5165 -               | -0,37           | ND              | ND               |
| PA1371 -               | 0,17            | ND              | ND               | PA3353 -               | -0,24           | 0,38            | <b>1,31</b>      | PA5166 -               | -0,03           | -0,16           | -0,42            |
| PA1372 -               | 0,08            | 0,03            | 0,01             | PA3354 -               | -0,15           | ND              | ND               | PA5167 -               | <b>2,07</b>     | <b>2,44</b>     | <b>4,87</b>      |
| PA1373 fabF2           | 0,21            | -0,06           | -0,39            | PA3355 -               | <b>-1,18</b>    | ND              | ND               | PA5168 -               | <b>1,98</b>     | <b>2,00</b>     | <b>3,72</b>      |
| PA1374 -               | -0,39           | ND              | ND               | PA3356 -               | -0,85           | 0,13            | <b>1,21</b>      | PA5169 -               | <b>2,83</b>     | ND              | ND               |
| PA1375 pdxB            | 0,19            | 0,11            | 0,13             | PA3357 dsdA            | -0,47           | -0,30           | -0,39            | PA5170 arcD            | -0,11           | 0,06            | 0,28             |
| PA1376 aceK            | -0,22           | ND              | ND               | PA3358 -               | 0,00            | ND              | ND               | PA5171 arcA            | <b>2,67</b>     | 0,11            | <b>-2,35</b>     |
| PA1377 -               | -0,03           | ND              | ND               | PA3359 -               | 0,28            | ND              | ND               | PA5172 arcB            | <b>3,36</b>     | 0,12            | <b>-3,02</b>     |
| PA1378 -               | 0,25            | ND              | ND               | PA3360 -               | <b>1,49</b>     | ND              | ND               | PA5173 arcC            | <b>3,49</b>     | 0,11            | <b>-3,16</b>     |
| PA1380 -               | 0,11            | ND              | ND               | PA3362 -               | <b>1,00</b>     | ND              | ND               | PA5174 -               | 0,55            | 0,00            | -0,56            |
| PA1381 -               | 0,00            | ND              | ND               | PA3363 amiR            | <b>1,72</b>     | ND              | ND               | PA5175 cysQ            | -0,15           | -0,07           | -0,06            |
| PA1382 -               | 0,29            | ND              | ND               | PA3364 amiC            | <b>1,97</b>     | 0,98            | 0,82             | PA5176 -               | -0,20           | -0,09           | -0,05            |
| PA1383 -               | 0,00            | 0,18            | 0,52             | PA3365 -               | <b>2,88</b>     | ND              | ND               | PA5177 -               | -0,22           | 0,14            | 0,61             |
| PA1384 galE            | 0,29            | ND              | ND               | PA3366 amiE            | <b>1,95</b>     | <b>1,72</b>     | <b>2,95</b>      | PA5178 -               | -0,32           | -0,44           | -0,94            |
| PA1385 -               | 0,87            | ND              | ND               | PA3366.1 amiL          | <b>1,69</b>     | ND              | ND               | PA5179 -               | -0,36           | ND              | ND               |
| PA1386 -               | 0,24            | ND              | ND               | PA3367 -               | 0,08            | ND              | ND               | PA5180 -               | -0,64           | ND              | ND               |
| PA1387 -               | -0,08           | ND              | ND               | PA3368.1 -             | 0,83            | ND              | ND               | PA5181 -               | -0,81           | ND              | ND               |
| PA1388 -               | 0,53            | ND              | ND               | PA3369 -               | -0,42           | ND              | ND               | PA5181.1 -             | -0,49           | ND              | ND               |
| PA1389 -               | 0,24            | ND              | ND               | PA3370 -               | -0,18           | ND              | ND               | PA5182 -               | -0,23           | ND              | ND               |
| PA1390 -               | 0,65            | ND              | ND               | PA3371 -               | 0,93            | ND              | ND               | PA5183 -               | -0,34           | ND              | ND               |
| PA1392 -               | <b>1,00</b>     | ND              | ND               | PA3372 -               | -0,39           | ND              | ND               | PA5184 -               | -0,45           | -0,10           | 0,16             |
| PA1393 cysC            | 0,36            | ND              | ND               | PA3373 -               | -0,08           | ND              | ND               | PA5185 -               | -0,97           | ND              | ND               |
| PA1394 -               | 0,90            | ND              | ND               | PA3385 amrZ            | <b>-1,30</b>    | -0,60           | -0,41            | PA5186 -               | -0,58           | ND              | ND               |
| PA1395 -               | 0,22            | ND              | ND               | PA3386 -               | <b>-1,03</b>    | ND              | ND               | PA5187 -               | -0,87           | ND              | ND               |
| PA1396 -               | 0,06            | ND              | ND               | PA3388 -               | -0,47           | ND              | ND               | PA5188 -               | -0,42           | ND              | ND               |
| PA1397 -               | 0,43            | ND              | ND               | PA3390 -               | <b>-1,19</b>    | ND              | ND               | PA5189 -               | -0,20           | ND              | ND               |
| PA1398 -               | 0,06            | ND              | ND               | PA3396 nosL            | 0,65            | ND              | ND               | PA5190 -               | -0,17           | -0,07           | -0,03            |
| PA1399 -               | -0,30           | ND              | ND               | PA3397 fpr             | 0,02            | -0,02           | -0,09            | PA5191 -               | -0,30           | ND              | ND               |
| PA1401 -               | -0,32           | ND              | ND               | PA3398 -               | -0,21           | ND              | ND               | PA5192 pckA            | -0,24           | -0,30           | -0,61            |
| PA1403 -               | 0,16            | ND              | ND               | PA3399 -               | -0,27           | ND              | ND               | PA5193 yrfI            | -0,18           | -0,26           | -0,55            |
| PA1404 -               | 0,24            | ND              | ND               | PA3400 -               | -0,09           | ND              | ND               | PA5194 -               | -0,02           | ND              | ND               |
| PA1405 -               | 0,00            | ND              | ND               | PA3401 -               | -0,30           | ND              | ND               | PA5195 -               | -0,30           | ND              | ND               |
| PA1406 -               | 0,00            | ND              | ND               | PA3402 -               | -0,29           | 0,28            | <b>1,10</b>      | PA5196 -               | -0,14           | ND              | ND               |
| PA1407 -               | 0,18            | ND              | ND               | PA3403 -               | 0,57            | ND              | ND               | PA5197 rimK            | -0,34           | 0,15            | 0,77             |
| PA1411 -               | 0,13            | ND              | ND               | PA3407 hasAp           | -0,22           | ND              | ND               | PA5198 -               | -0,35           | -0,09           | 0,10             |
| PA1413 -               | -0,92           | ND              | ND               | PA3410 -               | 0,00            | ND              | ND               | PA5199 amgS            | -0,06           | 0,26            | 0,79             |
| PA1414 -               | 0,54            | ND              | ND               | PA3411 -               | 0,65            | ND              | ND               | PA5200 amgR            | -0,33           | 0,01            | 0,35             |
| PA1415 -               | 0,35            | ND              | ND               | PA3413 -               | <b>-1,62</b>    | -0,61           | -0,11            | PA5201 -               | -0,15           | -0,26           | -0,59            |
| PA1416 -               | -0,82           | ND              | ND               | PA3414 -               | -0,97           | ND              | ND               | PA5202 -               | -0,06           | -0,05           | -0,08            |
| PA1417 -               | <b>-2,07</b>    | 0,20            | <b>2,64</b>      | PA3419 -               | <b>-1,39</b>    | ND              | ND               | PA5203 gshA            | -0,09           | -0,09           | -0,18            |
| PA1418 -               | <b>-2,17</b>    | ND              | ND               | PA3423 -               | -0,67           | ND              | ND               | PA5204 argA            | <b>-1,26</b>    | -0,69           | -0,70            |
| PA1419 -               | <b>-1,93</b>    | ND              | ND               | PA3425 -               | 0,46            | ND              | ND               | PA5205 -               | -0,25           | ND              | ND               |
| PA1420 -               | <b>-3,81</b>    | ND              | ND               | PA3426 -               | 0,00            | ND              | ND               | PA5206 argE            | -0,61           | ND              | ND               |
| PA1421 gbuA            | <b>-3,52</b>    | -0,37           | <b>2,45</b>      | PA3427 -               | <b>-1,00</b>    | ND              | ND               | PA5207 -               | 0,88            | ND              | ND               |
| PA1422 gbuR            | 0,58            | ND              | ND               | PA3431 -               | -0,13           | ND              | ND               | PA5208 -               | -0,38           | -0,10           | 0,11             |
| PA1423 bdIA            | 0,44            | ND              | ND               | PA3432 -               | -0,09           | ND              | ND               | PA5209 -               | -0,44           | -0,08           | 0,21             |
| PA1424 -               | -0,07           | ND              | ND               | PA3433 -               | -0,58           | ND              | ND               | PA5210 -               | -0,88           | -0,86           | <b>-1,57</b>     |
| PA1425 -               | 0,39            | ND              | ND               | PA3434 -               | 0,00            | ND              | ND               | PA5211 -               | 0,00            | ND              | ND               |
| PA1426 -               | 0,40            | ND              | ND               | PA3435 -               | -0,51           | -0,37           | -0,54            | PA5212 -               | -0,11           | ND              | ND               |
| PA1427 -               | 0,31            | ND              | ND               | PA3436 -               | <b>1,58</b>     | ND              | ND               | PA5213 gcvP1           | 0,18            | ND              | ND               |
| PA1428 -               | 0,71            | ND              | ND               | PA3437 folM            | -0,83           | ND              | ND               | PA5214 gcvH1           | -0,03           | 0,12            | 0,36             |
| PA1429 -               | 0,45            | ND              | ND               | PA3438 folE1           | -0,67           | -0,07           | 0,48             | PA5215 gcvT1           | 0,26            | -0,12           | -0,61            |
| PA1430 lasR            | -0,07           | 0,30            | 0,92             | PA3439 folX            | -0,86           | -0,20           | 0,30             | PA5216 -               | -0,04           | ND              | ND               |
| PA1431 rsal            | -0,34           | ND              | ND               | PA3440 -               | -0,18           | -0,12           | -0,17            | PA5217 -               | -0,01           | 0,83            | <b>2,37</b>      |
| PA1432 lasI            | 0,16            | -0,04           | -0,28            | PA3441 -               | 0,02            | ND              | ND               | PA5218 -               | -0,44           | ND              | ND               |
| PA1433 -               | 0,04            | 0,42            | <b>1,14</b>      | PA3442 -               | 0,09            | ND              | ND               | PA5219 -               | -0,28           | ND              | ND               |
| PA1434 -               | 0,64            | ND              | ND               | PA3446 -               | <b>-1,14</b>    | ND              | ND               | PA5220 -               | -0,27           | ND              | ND               |
| PA1437 -               | -0,30           | ND              | ND               | PA3450 -               | -0,31           | -0,06           | 0,13             | PA5221 -               | -0,04           | 0,09            | 0,30             |

| ID – Gene <sup>a</sup> | TC <sup>b</sup> | PC <sup>c</sup> | PTV <sup>d</sup> | ID – Gene <sup>a</sup> | TC <sup>b</sup> | PC <sup>c</sup> | PTV <sup>d</sup> | ID – Gene <sup>a</sup> | TC <sup>b</sup> | PC <sup>c</sup> | PTV <sup>d</sup> |
|------------------------|-----------------|-----------------|------------------|------------------------|-----------------|-----------------|------------------|------------------------|-----------------|-----------------|------------------|
| PA1438 -               | 0,92            | ND              | ND               | PA3451 -               | <b>-1,12</b>    | ND              | ND               | PA5222 -               | 0,26            | ND              | ND               |
| PA1439 -               | 0,14            | ND              | ND               | PA3452 mqaA            | <b>-1,45</b>    | -0,34           | 0,50             | PA5223 ubiH            | -0,06           | -0,03           | -0,03            |
| PA1440 -               | 0,31            | 0,25            | 0,40             | PA3453 -               | -0,10           | -0,34           | -0,86            | PA5224 pepP            | -0,27           | -0,08           | 0,03             |
| PA1441 -               | 0,32            | 0,17            | 0,18             | PA3454 -               | -0,65           | ND              | ND               | PA5225 -               | -0,45           | -0,02           | 0,38             |
| PA1442 -               | 0,47            | -0,06           | -0,64            | PA3455 -               | <b>-1,18</b>    | -0,37           | 0,11             | PA5226 -               | -0,73           | ND              | ND               |
| PA1443 fliM            | 0,21            | 0,14            | 0,18             | PA3456 -               | -0,15           | -0,10           | -0,14            | PA5227 -               | -0,62           | 0,04            | 0,74             |
| PA1444 fliN            | 0,19            | 0,08            | 0,04             | PA3457 -               | 0,31            | ND              | ND               | PA5227.1 ssrS          | 0,46            | ND              | ND               |
| PA1445 fliO            | 0,39            | ND              | ND               | PA3458 -               | -0,16           | ND              | ND               | PA5228 -               | -0,30           | ND              | ND               |
| PA1446 fliP            | 0,32            | ND              | ND               | PA3459 -               | <b>-1,16</b>    | ND              | ND               | PA5229 -               | 0,70            | -0,19           | <b>-1,25</b>     |
| PA1447 fliQ            | 0,25            | ND              | ND               | PA3463 -               | 0,13            | ND              | ND               | PA5230 -               | 0,95            | ND              | ND               |
| PA1448 fliR            | 0,50            | ND              | ND               | PA3465 -               | -0,57           | ND              | ND               | PA5231 -               | 0,73            | 0,03            | -0,64            |
| PA1449 flhB            | 0,49            | ND              | ND               | PA3466 -               | -0,31           | -0,10           | 0,01             | PA5232 -               | -0,19           | -0,27           | -0,57            |
| PA1450 -               | 0,44            | ND              | ND               | PA3468 -               | -0,76           | -0,44           | -0,48            | PA5233 -               | -0,52           | ND              | ND               |
| PA1451 -               | 0,56            | ND              | ND               | PA3469 -               | -0,58           | ND              | ND               | PA5234 -               | -0,61           | -0,18           | 0,09             |
| PA1452 flhA            | 0,02            | -0,14           | -0,43            | PA3470 -               | -0,80           | ND              | ND               | PA5235 glpT            | <b>-1,57</b>    | -0,34           | 0,60             |
| PA1453 flhF            | -0,18           | ND              | ND               | PA3471 -               | <b>-1,21</b>    | -0,54           | -0,34            | PA5236 -               | -0,51           | -0,09           | 0,25             |
| PA1454 fleN            | 0,17            | 0,06            | -0,01            | PA3472 -               | 0,05            | ND              | ND               | PA5237 -               | -0,31           | -0,11           | 0,00             |
| PA1455 fliA            | 0,24            | 0,00            | -0,23            | PA3473 -               | -0,86           | ND              | ND               | PA5238 -               | -0,29           | ND              | ND               |
| PA1456 cheY            | 0,26            | 0,06            | -0,09            | PA3474 -               | 0,00            | ND              | ND               | PA5239 rho             | -0,38           | -0,19           | -0,16            |
| PA1457 cheZ            | 0,26            | 0,11            | 0,06             | PA3475 pheC            | -0,34           | 0,21            | 0,95             | PA5240 trxA            | -0,39           | -0,20           | -0,18            |
| PA1458 -               | 0,23            | 0,15            | 0,20             | PA3476 rhlI            | -0,55           | ND              | ND               | PA5241 ppx             | -0,36           | -0,19           | -0,17            |
| PA1459 -               | 0,29            | 0,25            | 0,42             | PA3477 rhlR            | <b>-1,04</b>    | -0,40           | -0,11            | PA5242 ppk             | -0,15           | 0,24            | 0,83             |
| PA1460 motC            | 0,61            | ND              | ND               | PA3478 rhlB            | <b>-1,58</b>    | ND              | ND               | PA5243 hemB            | -0,33           | -0,14           | -0,07            |
| PA1461 motD            | 0,64            | 0,23            | 0,01             | PA3479 rhlA            | <b>-2,25</b>    | ND              | ND               | PA5244 -               | 0,01            | ND              | ND               |
| PA1462 -               | 0,39            | 0,05            | -0,26            | PA3480 -               | 0,00            | -0,29           | -0,83            | PA5245 -               | -0,47           | 0,00            | 0,45             |
| PA1463 -               | 0,36            | 0,09            | -0,10            | PA3481 -               | -0,60           | -0,24           | -0,09            | PA5246 -               | -0,17           | ND              | ND               |
| PA1464 -               | 0,34            | 0,33            | 0,60             | PA3482 metG            | -0,50           | -0,12           | 0,15             | PA5247 -               | -0,15           | ND              | ND               |
| PA1465 -               | 0,43            | ND              | ND               | PA3483 -               | -0,34           | -0,12           | 0,01             | PA5248 -               | 0,32            | 0,19            | 0,23             |
| PA1466 -               | 0,76            | ND              | ND               | PA3484 -               | -0,38           | -0,25           | -0,32            | PA5249 -               | -0,68           | ND              | ND               |
| PA1467 -               | -0,17           | ND              | ND               | PA3485 -               | -0,42           | ND              | ND               | PA5250 -               | 0,15            | ND              | ND               |
| PA1468 -               | 0,47            | ND              | ND               | PA3486 -               | -0,30           | ND              | ND               | PA5251 -               | 0,09            | ND              | ND               |
| PA1469 -               | -0,09           | ND              | ND               | PA3487 pldA            | -0,40           | ND              | ND               | PA5252 -               | 0,07            | -0,02           | -0,13            |
| PA1470 -               | 0,00            | ND              | ND               | PA3488 -               | -0,55           | ND              | ND               | PA5253 algP            | -0,63           | -0,36           | -0,39            |
| PA1471 -               | 0,52            | ND              | ND               | PA3489 -               | -0,03           | ND              | ND               | PA5254 -               | -0,25           | ND              | ND               |
| PA1472 -               | 0,69            | ND              | ND               | PA3490 -               | -0,47           | ND              | ND               | PA5255 algQ            | -0,65           | -0,13           | 0,30             |
| PA1473 -               | 0,53            | 0,24            | 0,16             | PA3491 -               | -0,21           | ND              | ND               | PA5256 dsbH            | 0,16            | ND              | ND               |
| PA1474 -               | 0,69            | 0,51            | 0,77             | PA3492 -               | -0,56           | ND              | ND               | PA5257 -               | -0,07           | 0,01            | 0,09             |
| PA1475 ccmA            | <b>1,11</b>     | 0,39            | -0,01            | PA3493 -               | -0,44           | ND              | ND               | PA5258 -               | -0,05           | -0,05           | -0,09            |
| PA1476 ccmB            | <b>1,24</b>     | ND              | ND               | PA3494 -               | -0,50           | ND              | ND               | PA5259 hemD            | -0,06           | 0,25            | 0,77             |
| PA1477 ccmC            | 0,95            | ND              | ND               | PA3495 nth             | 0,10            | ND              | ND               | PA5260 hemC            | -0,39           | 0,05            | 0,54             |
| PA1478 -               | 0,59            | ND              | ND               | PA3496 -               | <b>1,11</b>     | ND              | ND               | PA5261 algR            | -0,36           | -0,33           | -0,58            |
| PA1479 ccmE            | 0,57            | 0,51            | 0,87             | PA3497 -               | 0,28            | ND              | ND               | PA5262 algZ            | -0,93           | ND              | ND               |
| PA1480 ccmF            | 0,63            | 0,33            | 0,30             | PA3498 -               | -0,54           | ND              | ND               | PA5263 argH            | -0,44           | -0,13           | 0,07             |
| PA1481 ccmG            | 0,72            | 0,54            | 0,81             | PA3515 -               | 0,00            | ND              | ND               | PA5264 -               | -0,32           | ND              | ND               |
| PA1482 ccmH            | 0,64            | 0,44            | 0,62             | PA3524 gloA1           | -0,73           | -0,59           | -0,96            | PA5265 -               | -0,87           | ND              | ND               |
| PA1483 cycH            | 0,76            | 0,55            | 0,82             | PA3525 argG            | -0,22           | -0,24           | -0,47            | PA5267 hcpB            | -0,29           | ND              | ND               |
| PA1484 -               | 0,25            | ND              | ND               | PA3526 -               | -0,44           | -0,16           | -0,01            | PA5268 corA            | -0,57           | ND              | ND               |
| PA1487 -               | -0,35           | ND              | ND               | PA3527 pyrC            | -0,22           | -0,08           | 0,00             | PA5269 -               | -0,62           | 0,01            | 0,66             |
| PA1488 -               | -0,71           | ND              | ND               | PA3528 rnt             | -0,18           | 0,08            | 0,40             | PA5270 -               | -0,26           | ND              | ND               |
| PA1489 -               | -0,79           | ND              | ND               | PA3529 -               | -0,65           | -0,69           | <b>-1,31</b>     | PA5271 -               | -0,60           | ND              | ND               |
| PA1490 -               | 0,22            | 0,02            | -0,18            | PA3530 -               | <b>1,30</b>     | ND              | ND               | PA5272 cyaA            | 0,10            | ND              | ND               |
| PA1491 -               | -0,13           | ND              | ND               | PA3531 bfrB            | <b>-1,23</b>    | -0,77           | -0,96            | PA5273 -               | -0,62           | ND              | ND               |
| PA1492 -               | -0,35           | ND              | ND               | PA3532 -               | -0,77           | ND              | ND               | PA5274 rnk             | 0,07            | -0,07           | -0,27            |
| PA1493 cysP            | -0,54           | -0,08           | 0,32             | PA3533 -               | <b>-1,27</b>    | -0,09           | <b>1,01</b>      | PA5275 -               | -0,58           | 0,17            | <b>1,06</b>      |
| PA1494 -               | 0,00            | 0,09            | 0,26             | PA3535 -               | -0,06           | ND              | ND               | PA5276 lppL            | 0,00            | ND              | ND               |
| PA1495 -               | 0,58            | ND              | ND               | PA3536 -               | -0,37           | ND              | ND               | PA5277 lysA            | -0,06           | 0,03            | 0,15             |
| PA1496 -               | 0,39            | ND              | ND               | PA3537 argF            | -0,83           | -0,33           | -0,10            | PA5278 dapF            | -0,05           | 0,09            | 0,30             |
| PA1501 -               | -0,63           | ND              | ND               | PA3538 -               | -0,69           | -0,26           | -0,04            | PA5279 -               | -0,24           | -0,13           | -0,12            |
| PA1504 -               | 0,30            | 0,65            | <b>1,55</b>      | PA3539 -               | -0,52           | -0,45           | -0,77            | PA5280 sss             | -0,23           | ND              | ND               |
| PA1505 moaA2           | <b>-1,06</b>    | ND              | ND               | PA3545 algB            | <b>-1,58</b>    | ND              | ND               | PA5281 -               | -0,04           | ND              | ND               |
| PA1506 -               | <b>-1,27</b>    | ND              | ND               | PA3552 arnB            | -0,42           | -0,41           | -0,75            | PA5283 -               | -0,58           | ND              | ND               |
| PA1507 -               | -0,29           | ND              | ND               | PA3553 arnC            | -0,41           | -0,08           | 0,19             | PA5284 -               | 0,12            | ND              | ND               |
| PA1508 -               | 0,31            | ND              | ND               | PA3554 arnA            | -0,24           | -0,32           | -0,67            | PA5285 -               | 0,05            | 0,13            | 0,33             |
| PA1509 -               | 0,42            | ND              | ND               | PA3555 arnD            | 0,10            | ND              | ND               | PA5286 -               | 0,67            | ND              | ND               |
| PA1510 -               | 0,14            | ND              | ND               | PA3556 arnT            | -0,17           | ND              | ND               | PA5287 amtB            | -0,39           | ND              | ND               |
| PA1511 -               | -0,49           | ND              | ND               | PA3557 arnE            | -0,18           | ND              | ND               | PA5288 glnK            | -0,94           | -0,66           | -0,95            |
| PA1513 -               | 0,21            | 0,51            | <b>1,25</b>      | PA3558 arnF            | -0,08           | ND              | ND               | PA5289 -               | -0,01           | -0,14           | -0,40            |
| PA1514 -               | 0,29            | ND              | ND               | PA3559 -               | -0,37           | ND              | ND               | PA5290 -               | -0,42           | ND              | ND               |
| PA1515 alc             | 0,31            | ND              | ND               | PA3560 fruA            | 0,04            | -0,23           | -0,70            | PA5291 -               | -0,97           | -0,65           | -0,86            |
| PA1516 -               | 0,34            | 0,21            | 0,27             | PA3561 fruK            | -0,06           | 0,31            | 0,94             | PA5292 pchP            | -0,95           | ND              | ND               |
| PA1517 -               | 0,29            | 0,26            | 0,46             | PA3562 fruL            | -0,11           | 0,28            | 0,90             | PA5293 -               | -0,71           | ND              | ND               |
| PA1518 -               | -0,31           | -0,16           | -0,13            | PA3563 fruR            | -0,39           | 0,09            | 0,64             | PA5294 -               | -0,45           | ND              | ND               |
| PA1520 -               | 0,39            | 0,15            | 0,04             | PA3564 -               | -0,75           | ND              | ND               | PA5295 -               | -0,35           | ND              | ND               |
| PA1521 -               | -0,13           | 0,31            | <b>1,01</b>      | PA3565 -               | <b>-1,09</b>    | ND              | ND               | PA5296 rep             | 0,24            | 0,12            | 0,11             |
| PA1522 -               | 0,14            | ND              | ND               | PA3566 -               | -0,90           | -0,25           | 0,18             | PA5298 -               | 0,46            | 0,24            | 0,22             |
| PA1523 xdhB            | -0,46           | ND              | ND               | PA3567 -               | -0,70           | -0,25           | -0,01            | PA5299 -               | 0,20            | ND              | ND               |

| ID – Gene <sup>a</sup> | TC <sup>b</sup> | PC <sup>c</sup> | PTV <sup>d</sup> | ID – Gene <sup>a</sup> | TC <sup>b</sup> | PC <sup>c</sup> | PTV <sup>d</sup> | ID – Gene <sup>a</sup> | TC <sup>b</sup> | PC <sup>c</sup> | PTV <sup>d</sup> |
|------------------------|-----------------|-----------------|------------------|------------------------|-----------------|-----------------|------------------|------------------------|-----------------|-----------------|------------------|
| PA1524 xdhA            | -0,92           | ND              | ND               | PA3570 mmsA            | 0,65            | ND              | ND               | PA5300 cycB            | 0,10            | 0,12            | 0,26             |
| PA1526 -               | 0,22            | 0,57            | <b>1,41</b>      | PA3571 mmsR            | -0,83           | ND              | ND               | PA5301 -               | -0,23           | 0,03            | 0,33             |
| PA1527 -               | 0,57            | 0,33            | 0,37             | PA3572 -               | -0,65           | ND              | ND               | PA5302 dadX            | <b>1,34</b>     | <b>1,41</b>     | <b>2,67</b>      |
| PA1528 zipA            | 0,28            | 0,35            | 0,73             | PA3573 -               | -0,30           | ND              | ND               | PA5303 -               | <b>1,33</b>     | 0,82            | 0,99             |
| PA1529 lig             | 0,21            | 0,35            | 0,78             | PA3574 nalD            | -0,33           | -0,41           | -0,82            | PA5304 dadA            | 0,99            | <b>1,32</b>     | <b>2,76</b>      |
| PA1530 -               | 0,53            | 0,45            | 0,75             | PA3575 -               | 0,57            | ND              | ND               | PA5305 -               | -0,67           | -0,14           | 0,26             |
| PA1530.1 ffs           | 0,18            | ND              | ND               | PA3576 -               | -0,83           | ND              | ND               | PA5306 -               | -0,40           | ND              | ND               |
| PA1531 -               | 0,14            | ND              | ND               | PA3577 -               | -0,21           | ND              | ND               | PA5307 -               | -0,55           | ND              | ND               |
| PA1532 dnaX            | 0,36            | 0,23            | 0,30             | PA3578 -               | <b>-2,12</b>    | ND              | ND               | PA5308 lrp             | -0,80           | -0,21           | 0,20             |
| PA1533 -               | 0,14            | 0,28            | 0,65             | PA3579 -               | <b>-1,76</b>    | -0,23           | <b>1,10</b>      | PA5309 -               | -0,73           | 0,14            | <b>1,14</b>      |
| PA1534 recR            | 0,30            | 0,07            | -0,09            | PA3580 -               | <b>-1,80</b>    | ND              | ND               | PA5310 -               | 0,21            | ND              | ND               |
| PA1535 -               | 0,00            | ND              | ND               | PA3581 glpF            | <b>-2,04</b>    | ND              | ND               | PA5311 -               | <b>-1,13</b>    | ND              | ND               |
| PA1536 -               | -0,11           | ND              | ND               | PA3582 glpK            | <b>-1,93</b>    | <b>1,44</b>     | <b>6,02</b>      | PA5312 -               | <b>-1,49</b>    | 0,20            | <b>2,07</b>      |
| PA1539 -               | 0,25            | ND              | ND               | PA3583 glpR            | <b>-1,06</b>    | -0,14           | 0,66             | PA5313 -               | <b>-1,18</b>    | -0,28           | 0,40             |
| PA1540 -               | 0,30            | ND              | ND               | PA3584 glpD            | <b>-2,87</b>    | 0,16            | <b>3,31</b>      | PA5314 -               | <b>-1,41</b>    | ND              | ND               |
| PA1542 -               | <b>1,08</b>     | ND              | ND               | PA3585 glpM            | <b>1,22</b>     | ND              | ND               | PA5315 rpmG            | -0,29           | -0,31           | -0,60            |
| PA1543 apt             | 0,67            | 0,19            | -0,13            | PA3586 -               | 0,83            | ND              | ND               | PA5316 rpmB            | -0,17           | -0,13           | -0,19            |
| PA1544 anr             | 0,51            | -0,06           | -0,67            | PA3587 metR            | <b>-1,29</b>    | ND              | ND               | PA5316.1 -             | 0,17            | ND              | ND               |
| PA1545 -               | 0,40            | ND              | ND               | PA3594 -               | -0,74           | ND              | ND               | PA5317 -               | -0,84           | -0,31           | -0,04            |
| PA1546 hemN            | 0,68            | 0,04            | -0,56            | PA3599 -               | -0,71           | ND              | ND               | PA5318 -               | -0,82           | ND              | ND               |
| PA1547 -               | 0,58            | ND              | ND               | PA3600 -               | <b>-1,24</b>    | ND              | ND               | PA5319 radC            | -0,40           | ND              | ND               |
| PA1548 -               | <b>1,34</b>     | ND              | ND               | PA3601 -               | <b>-1,18</b>    | ND              | ND               | PA5320 coaC            | -0,13           | -0,07           | -0,06            |
| PA1549 -               | 0,97            | ND              | ND               | PA3602 -               | -0,90           | -0,53           | -0,59            | PA5321 dut             | -0,13           | 0,21            | 0,72             |
| PA1550 -               | 0,91            | 0,62            | 0,85             | PA3603 dgkA            | 0,14            | ND              | ND               | PA5322 algC            | -0,18           | -0,09           | -0,06            |
| PA1551 -               | 0,83            | 0,78            | <b>1,40</b>      | PA3604 erdR            | -0,09           | -0,30           | -0,75            | PA5323 argB            | -0,09           | -0,04           | -0,01            |
| PA1552 ccoP1           | -0,12           | 0,39            | <b>1,23</b>      | PA3605 -               | -0,43           | ND              | ND               | PA5324 -               | 0,24            | ND              | ND               |
| PA1552.1               |                 |                 |                  |                        |                 |                 |                  |                        |                 |                 |                  |
| ccoQ1                  | 0,05            | 0,74            | <b>2,07</b>      | PA3606 -               | 0,13            | ND              | ND               | PA5329 -               | -0,39           | ND              | ND               |
| PA1553 ccoO1           | 0,02            | 0,29            | 0,81             | PA3607 potA            | -0,23           | -0,41           | -0,93            | PA5330 -               | 0,52            | -0,44           | <b>-1,78</b>     |
| PA1554 ccoN1           | -0,03           | 0,45            | <b>1,30</b>      | PA3608 potB            | -0,64           | ND              | ND               | PA5331 pyrE            | <b>1,06</b>     | <b>-1,20</b>    | <b>-4,48</b>     |
| PA1555 ccoP2           | <b>3,09</b>     | 0,28            | <b>-2,28</b>     | PA3609 potC            | -0,40           | ND              | ND               | PA5333 -               | -0,08           | ND              | ND               |
| PA1555.1               |                 |                 |                  |                        |                 |                 |                  |                        |                 |                 |                  |
| ccoQ2                  | <b>1,78</b>     | ND              | ND               | PA3610 potD            | -0,57           | -0,14           | 0,17             | PA5334 rph             | -0,28           | -0,12           | -0,08            |
| PA1556 ccoO2           | <b>2,84</b>     | 0,09            | <b>-2,59</b>     | PA3611 -               | -0,03           | -0,03           | -0,04            | PA5335 -               | -0,04           | -0,04           | -0,07            |
| PA1557 ccoN2           | <b>1,76</b>     | ND              | ND               | PA3612 -               | 0,32            | ND              | ND               | PA5336 gmk             | -0,10           | -0,06           | -0,08            |
| PA1558 -               | 0,35            | 0,31            | 0,54             | PA3613 -               | 0,12            | -0,42           | <b>-1,31</b>     | PA5337 rpoZ            | -0,18           | -0,26           | -0,56            |
| PA1559 -               | 0,42            | ND              | ND               | PA3614 -               | <b>-1,48</b>    | -0,17           | 0,98             | PA5338 spoT            | -0,01           | 0,21            | 0,61             |
| PA1560 -               | 0,30            | ND              | ND               | PA3615 -               | -0,92           | -0,16           | 0,48             | PA5339 -               | -0,14           | 0,06            | 0,32             |
| PA1561 aer             | 0,70            | 0,09            | -0,43            | PA3616 -               | -0,79           | ND              | ND               | PA5340 -               | 0,04            | -0,05           | -0,18            |
| PA1562 acnA            | 0,09            | -0,07           | -0,30            | PA3617 recA            | -0,84           | -0,63           | -0,94            | PA5341 -               | 0,07            | ND              | ND               |
| PA1563 -               | 0,61            | 0,10            | -0,33            | PA3618 -               | <b>-1,30</b>    | -0,36           | 0,28             | PA5342 -               | -0,44           | ND              | ND               |
| PA1564 -               | 0,15            | 0,17            | 0,32             | PA3619 -               | <b>-1,14</b>    | ND              | ND               | PA5343 -               | -0,58           | -0,25           | -0,12            |
| PA1565 -               | -0,43           | 0,18            | 0,93             | PA3620 mutS            | -0,54           | -0,26           | -0,21            | PA5344 oxyR            | -0,50           | -0,17           | 0,01             |
| PA1566 -               | <b>-1,00</b>    | ND              | ND               | PA3621 fdxA            | -0,14           | -0,22           | -0,47            | PA5345 recG            | -0,47           | -0,01           | 0,44             |
| PA1570 -               | -0,36           | ND              | ND               | PA3621.1 rsmZ          | 0,92            | ND              | ND               | PA5346 -               | -0,77           | 0,05            | 0,91             |
| PA1571 -               | 0,33            | ND              | ND               | PA3622 rpoS            | -0,51           | ND              | ND               | PA5347 -               | 0,23            | ND              | ND               |
| PA1572 -               | -0,21           | 0,77            | <b>2,40</b>      | PA3623 -               | -0,58           | -0,18           | 0,06             | PA5348 -               | <b>1,26</b>     | <b>2,09</b>     | <b>4,68</b>      |
| PA1573 -               | 0,43            | ND              | ND               | PA3624 pcm             | -0,31           | -0,32           | -0,60            | PA5349 -               | -0,68           | -0,45           | -0,61            |
| PA1574 -               | 0,25            | 0,33            | 0,69             | PA3625 surE            | -0,08           | -0,23           | -0,58            | PA5350 rubA2           | -0,29           | ND              | ND               |
| PA1575 -               | 0,00            | ND              | ND               | PA3626 -               | -0,13           | -0,14           | -0,27            | PA5351 rubA1           | -0,23           | ND              | ND               |
| PA1576 -               | -0,10           | 0,05            | 0,25             | PA3627 ygbB            | 0,00            | -0,07           | -0,19            | PA5356 glcC            | <b>-1,47</b>    | ND              | ND               |
| PA1577 -               | 0,58            | ND              | ND               | PA3628 -               | -0,83           | ND              | ND               | PA5357 -               | -0,18           | -0,07           | -0,03            |
| PA1578 -               | 0,00            | ND              | ND               | PA3629 adhC            | <b>-1,03</b>    | -0,44           | -0,22            | PA5358 ubiA            | 0,08            | ND              | ND               |
| PA1579 -               | -0,74           | 0,03            | 0,84             | PA3630 -               | -0,58           | ND              | ND               | PA5359 -               | -0,39           | ND              | ND               |
| PA1580 gltA            | -0,51           | -0,39           | -0,60            | PA3631 -               | -0,27           | -0,01           | 0,24             | PA5360 phoB            | 0,13            | 0,20            | 0,43             |
| PA1581 sdhC            | 0,46            | 0,02            | -0,39            | PA3632 -               | -0,02           | ND              | ND               | PA5361 phoR            | -0,29           | -0,03           | 0,21             |
| PA1582 sdhD            | 0,35            | 0,14            | 0,04             | PA3633 ygbP            | 0,02            | -0,18           | -0,53            | PA5362 -               | -0,34           | -0,09           | 0,08             |
| PA1583 sdhA            | 0,22            | 0,04            | -0,10            | PA3634 -               | 0,03            | ND              | ND               | PA5363 -               | -0,82           | ND              | ND               |
| PA1584 sdhB            | 0,12            | 0,02            | -0,06            | PA3635 eno             | -0,05           | -0,11           | -0,25            | PA5364 -               | -0,58           | 0,01            | 0,59             |
| PA1585 sucA            | 0,23            | 0,24            | 0,46             | PA3636 kdsA            | 0,13            | 0,09            | 0,13             | PA5365 phoU            | -0,63           | 0,13            | 0,99             |
| PA1586 sucB            | 0,29            | 0,31            | 0,59             | PA3637 pyrG            | 0,26            | -0,02           | -0,31            | PA5366 pstB            | -0,44           | 0,24            | <b>1,13</b>      |
| PA1587 lpdG            | 0,33            | 0,27            | 0,45             | PA3638 -               | 0,22            | ND              | ND               | PA5367 pstA            | 0,00            | 0,50            | <b>1,42</b>      |
| PA1588 sucC            | 0,52            | 0,49            | 0,87             | PA3639 accA            | 0,12            | -0,34           | <b>-1,09</b>     | PA5368 pstC            | 0,00            | 0,21            | 0,59             |
| PA1589 sucD            | 0,49            | 0,44            | 0,76             | PA3640 dnaE            | -0,25           | -0,03           | 0,16             | PA5369 pstS            | -0,22           | 0,28            | <b>1,02</b>      |
| PA1590 braB            | 0,66            | ND              | ND               | PA3641 -               | -0,40           | -0,21           | -0,19            | PA5369.3 -             | 0,06            | ND              | ND               |
| PA1591 -               | <b>1,89</b>     | 0,35            | -0,88            | PA3642 rnhB            | -0,33           | -0,10           | 0,06             | PA5369.4 -             | 0,20            | ND              | ND               |
| PA1592 -               | 0,57            | ND              | ND               | PA3643 lpxB            | 0,21            | 0,06            | -0,04            | PA5370 -               | -0,06           | ND              | ND               |
| PA1593 -               | 0,65            | ND              | ND               | PA3644 lpxA            | -0,04           | -0,12           | -0,29            | PA5371 -               | -0,20           | ND              | ND               |
| PA1594 -               | 0,63            | ND              | ND               | PA3645 fabZ            | 0,11            | 0,15            | 0,32             | PA5372 betA            | -0,64           | ND              | ND               |
| PA1595 -               | 0,78            | ND              | ND               | PA3646 lpxD            | 0,01            | 0,14            | 0,38             | PA5373 betB            | -0,94           | -0,58           | -0,70            |
| PA1596 htpG            | 0,35            | 0,13            | 0,02             | PA3647 -               | -0,09           | -0,10           | -0,18            | PA5374 betI            | -0,54           | -0,28           | -0,26            |
| PA1597 -               | 0,45            | -0,15           | -0,89            | PA3648 opr86           | -0,17           | -0,36           | -0,85            | PA5376 -               | -0,36           | -0,41           | -0,80            |
| PA1598 -               | 0,22            | ND              | ND               | PA3649 -               | 0,12            | 0,08            | 0,11             | PA5377 -               | -0,50           | ND              | ND               |
| PA1599 -               | -0,47           | ND              | ND               | PA3650 dxr             | -0,01           | -0,05           | -0,14            | PA5378 -               | -0,75           | -0,33           | -0,20            |
| PA1600 -               | <b>-2,46</b>    | -0,12           | <b>2,11</b>      | PA3651 cdsA            | 0,05            | ND              | ND               | PA5380 gbdR            | 0,09            | ND              | ND               |
| PA1601 -               | <b>-3,48</b>    | -0,58           | <b>1,84</b>      | PA3652 uppS            | -0,14           | -0,19           | -0,40            | PA5381 -               | 0,19            | ND              | ND               |

| ID – Gene <sup>a</sup> | TC <sup>b</sup> | PC <sup>c</sup> | PTV <sup>d</sup> | ID – Gene <sup>a</sup> | TC <sup>b</sup> | PC <sup>c</sup> | PTV <sup>d</sup> | ID – Gene <sup>a</sup> | TC <sup>b</sup> | PC <sup>c</sup> | PTV <sup>d</sup> |
|------------------------|-----------------|-----------------|------------------|------------------------|-----------------|-----------------|------------------|------------------------|-----------------|-----------------|------------------|
| PA1602 -               | <b>-3,44</b>    | ND              | ND               | PA3653 frr             | -0,44           | -0,35           | -0,56            | PA5382 -               | -0,51           | ND              | ND               |
| PA1603 -               | 0,42            | ND              | ND               | PA3654 pyrH            | -0,33           | -0,45           | -0,95            | PA5389 cdhR            | -0,65           | ND              | ND               |
| PA1604 -               | -0,49           | ND              | ND               | PA3655 tsf             | -0,29           | -0,19           | -0,25            | PA5390 -               | -0,29           | ND              | ND               |
| PA1605 -               | -0,87           | ND              | ND               | PA3656 rpsB            | -0,12           | -0,09           | -0,13            | PA5394 cls             | -0,49           | ND              | ND               |
| PA1606 -               | -0,29           | ND              | ND               | PA3657 map             | -0,37           | -0,28           | -0,43            | PA5396 -               | <b>-1,17</b>    | ND              | ND               |
| PA1607 -               | 0,11            | ND              | ND               | PA3658 glnD            | -0,33           | ND              | ND               | PA5397 -               | <b>-1,46</b>    | ND              | ND               |
| PA1608 -               | 0,66            | 0,50            | 0,77             | PA3659 -               | -0,67           | -0,27           | -0,10            | PA5402 -               | <b>-1,28</b>    | ND              | ND               |
| PA1609 fabB            | 0,78            | 0,09            | -0,54            | PA3660 -               | <b>-1,28</b>    | ND              | ND               | PA5403 -               | -0,66           | ND              | ND               |
| PA1610 fabA            | 0,92            | 0,21            | -0,32            | PA3661 -               | 0,00            | ND              | ND               | PA5404 -               | <b>-1,49</b>    | ND              | ND               |
| PA1611 -               | 0,55            | 0,19            | -0,02            | PA3662 -               | <b>-1,27</b>    | ND              | ND               | PA5405 -               | <b>-1,78</b>    | ND              | ND               |
| PA1612 -               | 0,46            | ND              | ND               | PA3663 -               | -0,53           | ND              | ND               | PA5406 -               | -0,20           | -0,31           | -0,69            |
| PA1613 -               | 0,34            | ND              | ND               | PA3664 -               | -0,58           | -0,04           | 0,47             | PA5407 -               | -0,45           | ND              | ND               |
| PA1614 gpsA            | 0,38            | 0,14            | 0,00             | PA3665 -               | -0,49           | ND              | ND               | PA5408 -               | -0,89           | ND              | ND               |
| PA1615 -               | 0,22            | ND              | ND               | PA3666 dapD            | -0,65           | -0,40           | -0,48            | PA5409 -               | <b>-1,35</b>    | ND              | ND               |
| PA1616 -               | 0,33            | 0,59            | <b>1,36</b>      | PA3667 -               | -0,38           | 0,09            | 0,63             | PA5410 gbcA            | -0,65           | ND              | ND               |
| PA1617 -               | 0,50            | ND              | ND               | PA3668 -               | -0,25           | ND              | ND               | PA5411 gbcB            | -0,58           | ND              | ND               |
| PA1618 -               | -0,14           | -0,02           | 0,09             | PA3669 -               | 0,00            | ND              | ND               | PA5412 -               | -0,39           | 0,02            | 0,45             |
| PA1619 -               | 0,36            | ND              | ND               | PA3670 -               | -0,14           | ND              | ND               | PA5413 ltaA            | -0,18           | 0,19            | 0,73             |
| PA1621 -               | 0,49            | ND              | ND               | PA3671 -               | -0,45           | ND              | ND               | PA5414 -               | -0,30           | 0,09            | 0,55             |
| PA1622 -               | 0,64            | ND              | ND               | PA3672 -               | -0,10           | -0,01           | 0,06             | PA5415 glyA1           | <b>2,17</b>     | ND              | ND               |
| PA1623 -               | -0,30           | 0,25            | <b>1,00</b>      | PA3673 plsB            | -0,21           | -0,26           | -0,53            | PA5422 -               | -0,41           | -0,12           | 0,08             |
| PA1624 -               | 0,28            | 0,27            | 0,48             | PA3674 -               | -0,92           | -0,55           | -0,65            | PA5423 -               | 0,02            | 0,42            | <b>1,18</b>      |
| PA1625 -               | 0,14            | ND              | ND               | PA3675 -               | -0,25           | -0,19           | -0,30            | PA5424 -               | -0,34           | ND              | ND               |
| PA1626 -               | 0,00            | ND              | ND               | PA3676 -               | 0,23            | ND              | ND               | PA5425 purK            | -0,04           | -0,12           | -0,29            |
| PA1627 -               | 0,30            | ND              | ND               | PA3677 -               | <b>1,06</b>     | ND              | ND               | PA5426 purE            | 0,18            | -0,09           | -0,43            |
| PA1628 -               | 0,42            | ND              | ND               | PA3678 -               | -0,13           | -0,10           | -0,17            | PA5427 adhA            | -0,01           | -0,12           | -0,33            |
| PA1629 -               | 0,30            | ND              | ND               | PA3679 -               | -0,06           | ND              | ND               | PA5428 -               | -0,11           | -0,01           | 0,09             |
| PA1630 -               | 0,09            | ND              | ND               | PA3680 -               | -0,23           | ND              | ND               | PA5429 aspA            | -0,05           | 0,60            | <b>1,76</b>      |
| PA1631 -               | -0,42           | ND              | ND               | PA3681 -               | 0,00            | ND              | ND               | PA5430 -               | 0,09            | 0,25            | 0,62             |
| PA1632 kdpF            | <b>2,83</b>     | ND              | ND               | PA3683 -               | -0,39           | ND              | ND               | PA5431 -               | -0,65           | ND              | ND               |
| PA1633 kdpA            | <b>2,90</b>     | ND              | ND               | PA3684 -               | -0,42           | ND              | ND               | PA5432 -               | 0,42            | ND              | ND               |
| PA1634 kdpB            | <b>3,46</b>     | <b>1,19</b>     | -0,06            | PA3685 -               | -0,27           | -0,18           | -0,24            | PA5433 -               | 0,27            | ND              | ND               |
| PA1635 kdpC            | <b>3,00</b>     | ND              | ND               | PA3686 adk             | <b>-1,18</b>    | -0,56           | -0,42            | PA5434 mtr             | 0,40            | ND              | ND               |
| PA1636 kdpD            | <b>1,91</b>     | 0,67            | -0,01            | PA3687 ppc             | -0,89           | -0,40           | -0,25            | PA5435 -               | <b>1,69</b>     | <b>1,05</b>     | <b>1,29</b>      |
| PA1637 kdpE            | 0,68            | ND              | ND               | PA3688 -               | -0,29           | ND              | ND               | PA5436 -               | <b>1,09</b>     | 0,88            | <b>1,40</b>      |
| PA1638 -               | 0,53            | ND              | ND               | PA3689 -               | -0,87           | ND              | ND               | PA5437 -               | -0,20           | -0,13           | -0,18            |
| PA1639 -               | -0,03           | -0,21           | -0,58            | PA3690 -               | -0,46           | <b>1,02</b>     | <b>3,36</b>      | PA5438 -               | -0,35           | -0,13           | -0,01            |
| PA1640 -               | 0,07            | 0,10            | 0,22             | PA3691 -               | <b>-1,02</b>    | -0,11           | 0,71             | PA5439 -               | -0,08           | ND              | ND               |
| PA1641 -               | 0,00            | ND              | ND               | PA3692 lptF            | -0,69           | -0,53           | -0,80            | PA5440 -               | 0,77            | -0,05           | -0,90            |
| PA1642 selD            | 0,29            | 0,26            | 0,46             | PA3693 -               | -0,33           | ND              | ND               | PA5441 -               | -0,09           | -0,02           | 0,03             |
| PA1643 -               | 0,42            | 0,27            | 0,34             | PA3694 -               | 0,09            | -0,07           | -0,30            | PA5442 -               | <b>1,68</b>     | ND              | ND               |
| PA1644 -               | 0,20            | 0,09            | 0,04             | PA3695 -               | -0,25           | ND              | ND               | PA5443 uvrD            | -0,38           | -0,11           | 0,06             |
| PA1645 -               | 0,05            | ND              | ND               | PA3696 -               | -0,79           | -0,23           | 0,13             | PA5444 -               | -0,49           | ND              | ND               |
| PA1647 -               | 0,46            | ND              | ND               | PA3697 -               | -0,67           | ND              | ND               | PA5445 -               | <b>-4,28</b>    | <b>-1,26</b>    | 0,68             |
| PA1649 -               | 0,00            | ND              | ND               | PA3698 -               | -0,69           | ND              | ND               | PA5446 -               | <b>2,21</b>     | <b>1,10</b>     | 0,94             |
| PA1650 -               | 0,71            | ND              | ND               | PA3699 -               | -0,27           | ND              | ND               | PA5447 wbpZ            | <b>1,42</b>     | ND              | ND               |
| PA1651 -               | 0,84            | ND              | ND               | PA3700 lysS            | -0,19           | -0,12           | -0,15            | PA5448 wbpY            | 0,23            | ND              | ND               |
| PA1652 -               | 0,69            | ND              | ND               | PA3701 prfB            | -0,20           | ND              | ND               | PA5449 wbpX            | 0,73            | ND              | ND               |
| PA1653 -               | 0,52            | ND              | ND               | PA3702 wspR            | -0,30           | -0,15           | -0,12            | PA5450 wzt             | 0,55            | ND              | ND               |
| PA1654 -               | 0,47            | 0,55            | <b>1,09</b>      | PA3703 wspF            | -0,33           | ND              | ND               | PA5451 wzm             | 0,69            | ND              | ND               |
| PA1655 -               | 0,56            | 0,24            | 0,14             | PA3704 wspE            | -0,45           | 0,05            | 0,59             | PA5452 wbpW            | 0,26            | ND              | ND               |
| PA1656 -               | 0,43            | ND              | ND               | PA3705 wspD            | -0,42           | -0,61           | <b>-1,33</b>     | PA5453 gmd             | 0,68            | ND              | ND               |
| PA1657 -               | 0,61            | -0,27           | <b>-1,37</b>     | PA3706 wspC            | -0,33           | -0,37           | -0,72            | PA5454 rmd             | -0,12           | ND              | ND               |
| PA1658 -               | 0,61            | -0,38           | <b>-1,71</b>     | PA3707 wspB            | -0,31           | ND              | ND               | PA5455 -               | 0,31            | ND              | ND               |
| PA1659 -               | <b>1,09</b>     | ND              | ND               | PA3708 wspA            | -0,53           | -0,22           | -0,09            | PA5456 -               | 0,42            | 0,55            | <b>1,14</b>      |
| PA1660 -               | 0,95            | ND              | ND               | PA3711 -               | -0,35           | ND              | ND               | PA5457 -               | 0,50            | 0,32            | 0,40             |
| PA1661 -               | <b>1,40</b>     | ND              | ND               | PA3712 -               | <b>-1,55</b>    | ND              | ND               | PA5458 -               | 0,51            | ND              | ND               |
| PA1662 -               | <b>1,00</b>     | -0,03           | <b>-1,07</b>     | PA3713 spdH            | <b>-1,44</b>    | -0,72           | -0,60            | PA5459 -               | 0,62            | 0,80            | <b>1,65</b>      |
| PA1663 -               | <b>1,24</b>     | ND              | ND               | PA3714 -               | -0,92           | ND              | ND               | PA5460 -               | -0,36           | ND              | ND               |
| PA1664 -               | <b>1,54</b>     | ND              | ND               | PA3715 -               | -0,39           | -0,01           | 0,36             | PA5461 -               | 0,69            | ND              | ND               |
| PA1665 -               | <b>1,00</b>     | ND              | ND               | PA3716 -               | -0,44           | -0,46           | -0,87            | PA5462 -               | 0,10            | ND              | ND               |
| PA1666 -               | <b>1,40</b>     | ND              | ND               | PA3717 -               | -0,18           | -0,19           | -0,37            | PA5463 -               | -0,17           | ND              | ND               |
| PA1667 -               | 0,88            | ND              | ND               | PA3719 armR            | <b>-1,94</b>    | ND              | ND               | PA5464 -               | -0,25           | ND              | ND               |
| PA1668 -               | <b>1,00</b>     | ND              | ND               | PA3720 -               | <b>-1,78</b>    | ND              | ND               | PA5465 -               | -0,56           | ND              | ND               |
| PA1669 -               | <b>1,00</b>     | ND              | ND               | PA3721 nalC            | 0,30            | ND              | ND               | PA5466 -               | <b>-1,28</b>    | ND              | ND               |
| PA1670 stp1            | <b>1,22</b>     | ND              | ND               | PA3722 -               | 0,72            | ND              | ND               | PA5467 -               | -0,95           | ND              | ND               |
| PA1671 stk1            | 0,79            | ND              | ND               | PA3724 lasB            | -0,87           | ND              | ND               | PA5468 -               | <b>-1,44</b>    | ND              | ND               |
| PA1672 -               | -0,30           | ND              | ND               | PA3725 recJ            | -0,40           | -0,13           | 0,04             | PA5469 -               | -0,70           | ND              | ND               |
| PA1673 -               | 0,86            | 0,33            | 0,08             | PA3726 -               | -0,38           | -0,19           | -0,17            | PA5470 -               | -0,63           | ND              | ND               |
| PA1674 folE2           | 0,57            | 0,21            | 0,03             | PA3727 -               | -0,16           | ND              | ND               | PA5471 -               | -0,19           | ND              | ND               |
| PA1675 -               | 0,79            | 0,14            | -0,38            | PA3728 -               | -0,34           | -0,24           | -0,35            | PA5471.1 -             | -0,19           | ND              | ND               |
| PA1676 -               | -0,19           | ND              | ND               | PA3729 -               | -0,63           | -0,37           | -0,43            | PA5472 -               | -0,58           | -0,60           | <b>-1,13</b>     |
| PA1677 -               | -0,80           | -0,33           | -0,14            | PA3730 -               | -0,52           | -0,05           | 0,38             | PA5473 -               | -0,79           | ND              | ND               |
| PA1678 -               | 0,62            | 0,32            | 0,30             | PA3731 -               | -0,53           | -0,44           | -0,72            | PA5474 -               | <b>-1,09</b>    | ND              | ND               |
| PA1679 -               | 0,27            | ND              | ND               | PA3732 -               | -0,59           | -0,46           | -0,71            | PA5475 -               | <b>-1,55</b>    | -0,33           | 0,62             |
| PA1681 aroC            | 0,01            | 0,12            | 0,34             | PA3733 -               | -0,31           | -0,35           | -0,69            | PA5476 citA            | -0,89           | ND              | ND               |

| ID – Gene <sup>a</sup> | TC <sup>b</sup> | PC <sup>c</sup> | PTV <sup>d</sup> | ID – Gene <sup>a</sup> | TC <sup>b</sup> | PC <sup>c</sup> | PTV <sup>d</sup> | ID – Gene <sup>a</sup> | TC <sup>b</sup> | PC <sup>c</sup> | PTV <sup>d</sup> |
|------------------------|-----------------|-----------------|------------------|------------------------|-----------------|-----------------|------------------|------------------------|-----------------|-----------------|------------------|
| PA1682 -               | 0,25            | ND              | ND               | PA3735 thrC            | -0,55           | -0,48           | -0,80            | PA5477 -               | -0,15           | ND              | ND               |
| PA1683 -               | 0,47            | 0,06            | -0,31            | PA3736 hom             | -0,39           | -0,47           | -0,96            | PA5478 -               | -0,07           | ND              | ND               |
| PA1684 -               | 0,42            | 0,13            | -0,06            | PA3737 dsbC            | -0,28           | -0,18           | -0,22            | PA5479 gltP            | -0,36           | -0,18           | -0,16            |
| PA1685 masA            | 0,64            | 0,19            | -0,10            | PA3738 xerD            | -0,51           | -0,16           | 0,06             | PA5480 -               | -0,42           | ND              | ND               |
| PA1686 alkA            | 0,23            | 0,27            | 0,54             | PA3739 -               | -0,78           | ND              | ND               | PA5481 -               | -2,07           | ND              | ND               |
| PA1687 speE            | 0,42            | -0,02           | -0,48            | PA3740 -               | -0,55           | ND              | ND               | PA5482 -               | -1,79           | ND              | ND               |
| PA1688 -               | 0,79            | 0,39            | 0,30             | PA3741 -               | -0,42           | ND              | ND               | PA5483 algB            | -0,45           | -0,03           | 0,36             |
| PA1689 -               | 0,37            | 0,63            | 1,43             | PA3742 rplS            | -0,23           | -0,03           | 0,14             | PA5484 -               | -0,50           | -0,02           | 0,46             |
|                        |                 |                 |                  |                        |                 |                 |                  | PA5485                 |                 |                 |                  |
| PA1692 -               | -0,31           | ND              | ND               | PA3743 trmD            | 0,20            | 0,02            | -0,15            | ampDh2                 | -0,15           | -0,14           | -0,26            |
| PA1693 pscR            | -0,35           | ND              | ND               | PA3744 rimM            | 0,26            | -0,14           | -0,66            | PA5486 -               | -0,19           | ND              | ND               |
| PA1694 pscQ            | -0,58           | ND              | ND               | PA3745 rpsP            | 0,15            | -0,21           | -0,73            | PA5487 -               | 0,14            | 0,06            | 0,03             |
| PA1695 pscP            | -0,54           | ND              | ND               | PA3746 ffh             | -0,19           | -0,27           | -0,59            | PA5488 -               | -0,03           | ND              | ND               |
| PA1696 pscO            | -1,54           | ND              | ND               | PA3747 -               | -0,33           | ND              | ND               | PA5489 dsbA            | -0,32           | 0,00            | 0,32             |
| PA1697 -               | -1,03           | ND              | ND               | PA3748 -               | -0,14           | 0,06            | 0,32             | PA5490 cc4             | 0,15            | 0,19            | 0,39             |
| PA1698 popN            | -1,03           | ND              | ND               | PA3750 -               | -0,13           | ND              | ND               | PA5491 -               | 0,69            | ND              | ND               |
| PA1699 -               | -1,12           | ND              | ND               | PA3751 purT            | -0,50           | -0,31           | -0,38            | PA5492 -               | -0,30           | -0,01           | 0,28             |
| PA1700 -               | -1,27           | ND              | ND               | PA3752 -               | -0,75           | ND              | ND               | PA5493 polA            | -0,46           | -0,21           | -0,13            |
| PA1701 -               | -1,47           | ND              | ND               | PA3753 -               | -0,54           | ND              | ND               | PA5494 -               | -0,58           | ND              | ND               |
| PA1702 -               | -1,06           | ND              | ND               | PA3754 -               | -1,16           | ND              | ND               | PA5495 thrB            | -0,36           | -0,11           | 0,06             |
| PA1703 pcrD            | -1,24           | ND              | ND               | PA3755 -               | -1,05           | ND              | ND               | PA5496 nrdJb           | 0,93            | ND              | ND               |
| PA1704 pcrR            | -1,28           | ND              | ND               | PA3756 -               | -0,32           | ND              | ND               | PA5497 nrdJa           | -0,29           | -0,17           | -0,18            |
| PA1705 pcrG            | -1,64           | ND              | ND               | PA3757 -               | -0,35           | ND              | ND               | PA5498 -               | 0,06            | -0,04           | -0,17            |
| PA1706 pcrV            | -1,67           | ND              | ND               | PA3758 -               | -0,71           | ND              | ND               | PA5499 np20            | -0,50           | ND              | ND               |
| PA1707 pcrH            | -1,50           | ND              | ND               | PA3759 -               | -0,45           | 0,11            | 0,75             | PA5500 znuC            | -0,11           | ND              | ND               |
| PA1708 popB            | -1,32           | ND              | ND               | PA3760 -               | -0,50           | 0,44            | 1,76             | PA5501 znuB            | 0,00            | ND              | ND               |
| PA1709 popD            | -1,27           | ND              | ND               | PA3761 -               | -0,24           | 0,24            | 0,92             | PA5502 -               | 0,28            | 0,02            | -0,22            |
| PA1710 exsC            | -0,65           | ND              | ND               | PA3762 -               | -2,17           | ND              | ND               | PA5503 -               | 0,13            | 0,16            | 0,34             |
| PA1711 exsE            | -0,64           | ND              | ND               | PA3763 purL            | -0,08           | -0,03           | -0,02            | PA5504 -               | -0,19           | 0,29            | 1,01             |
| PA1712 exsB            | -0,40           | ND              | ND               | PA3764 -               | -0,43           | ND              | ND               | PA5505 -               | -0,30           | -0,03           | 0,21             |
| PA1713 exsA            | -0,88           | ND              | ND               | PA3765 -               | -0,37           | -0,23           | -0,29            | PA5506 -               | -4,96           | 0,76            | 7,14             |
| PA1714 exsD            | -0,65           | -0,77           | -1,54            | PA3766 -               | -2,72           | ND              | ND               | PA5507 -               | -4,71           | 0,87            | 7,19             |
| PA1715 pscB            | -0,95           | ND              | ND               | PA3767 -               | -0,07           | ND              | ND               | PA5508 -               | -4,03           | 0,80            | 6,32             |
| PA1716 pscC            | -0,90           | ND              | ND               | PA3768 -               | 0,04            | 0,01            | -0,01            | PA5509 -               | -3,43           | 0,81            | 5,74             |
| PA1717 pscD            | -0,89           | ND              | ND               | PA3769 guaA            | -0,30           | -0,19           | -0,22            | PA5510 -               | -2,56           | 0,44            | 3,82             |
| PA1718 pscE            | -1,03           | 0,28            | 1,82             | PA3770 guaB            | -0,15           | -0,13           | -0,22            | PA5511 mifR            | -0,29           | -0,08           | 0,06             |
| PA1719 pscF            | -1,30           | ND              | ND               | PA3777 xseA            | -0,21           | ND              | ND               | PA5512 mifS            | -0,28           | ND              | ND               |
| PA1720 pscG            | -0,80           | ND              | ND               | PA3778 -               | -0,15           | ND              | ND               | PA5513 poxA            | 0,31            | ND              | ND               |
| PA1721 pscH            | -1,16           | ND              | ND               | PA3779 -               | 0,00            | 0,89            | 2,54             | PA5514 -               | -0,58           | ND              | ND               |
| PA1722 pscI            | -1,08           | ND              | ND               | PA3780 -               | -0,13           | ND              | ND               | PA5515 -               | -0,78           | ND              | ND               |
| PA1723 pscJ            | -0,80           | ND              | ND               | PA3781 -               | 0,13            | ND              | ND               | PA5516 pdxY            | -0,23           | -0,17           | -0,24            |
| PA1724 pscK            | -0,68           | ND              | ND               | PA3782 -               | -0,37           | ND              | ND               | PA5517 -               | 0,05            | ND              | ND               |
| PA1725 pscL            | -0,58           | ND              | ND               | PA3783 -               | -0,44           | ND              | ND               | PA5518 -               | 0,00            | 0,09            | 0,24             |
| PA1726 bglX            | 0,50            | ND              | ND               | PA3784 -               | 0,27            | ND              | ND               | PA5519 -               | 0,35            | ND              | ND               |
| PA1727 mucR            | 0,76            | ND              | ND               | PA3785 -               | 0,87            | 0,63            | 0,93             | PA5520 -               | -0,63           | ND              | ND               |
| PA1728 -               | 0,00            | ND              | ND               | PA3786 -               | -0,21           | ND              | ND               | PA5521 -               | -0,52           | 0,14            | 0,93             |
| PA1729 -               | 0,09            | ND              | ND               | PA3787 -               | -0,30           | -0,07           | 0,08             | PA5522 -               | -0,42           | 0,14            | 0,81             |
| PA1733 -               | -0,24           | ND              | ND               | PA3788 -               | -0,43           | ND              | ND               | PA5523 -               | -0,55           | 0,33            | 1,49             |
| PA1734 -               | -0,63           | ND              | ND               | PA3789 -               | -0,11           | -0,36           | -0,91            | PA5524 -               | -0,51           | ND              | ND               |
| PA1735 -               | 0,56            | ND              | ND               | PA3790 oprC            | 0,39            | -0,21           | -0,98            | PA5525 -               | 0,00            | ND              | ND               |
| PA1736 -               | 0,65            | ND              | ND               | PA3791 -               | -0,08           | ND              | ND               | PA5526 -               | -0,32           | ND              | ND               |
| PA1737 -               | 0,70            | ND              | ND               | PA3792 leuA            | -0,73           | -0,21           | 0,13             | PA5527 -               | 0,07            | ND              | ND               |
| PA1738 -               | -0,10           | -0,07           | -0,10            | PA3793 -               | -0,51           | ND              | ND               | PA5528 -               | -0,37           | 0,25            | 1,07             |
| PA1740 -               | -0,45           | ND              | ND               | PA3794 -               | -0,58           | ND              | ND               | PA5529 -               | -0,65           | ND              | ND               |
| PA1741 -               | -0,34           | ND              | ND               | PA3795 -               | -0,29           | -0,06           | 0,13             | PA5530 -               | 5,37            | 1,83            | -0,16            |
| PA1742 -               | -0,68           | 0,55            | 2,23             | PA3796 -               | -0,03           | ND              | ND               | PA5531 tonB1           | 0,28            | 1,18            | 3,08             |
| PA1746 -               | 0,32            | 0,19            | 0,23             | PA3797 -               | -0,57           | ND              | ND               | PA5532 -               | -0,66           | ND              | ND               |
| PA1747 -               | 1,09            | ND              | ND               | PA3798 -               | -0,62           | -0,41           | -0,56            | PA5533 -               | -0,43           | ND              | ND               |
| PA1748 -               | 0,39            | 0,15            | 0,03             | PA3799 -               | -0,16           | -0,13           | -0,22            | PA5534 -               | -1,00           | ND              | ND               |
| PA1749 -               | 0,21            | 0,20            | 0,35             | PA3800 -               | -0,28           | -0,07           | 0,08             | PA5535 -               | -0,87           | ND              | ND               |
| PA1750 -               | 0,26            | 0,11            | 0,04             | PA3801 -               | -0,24           | -0,06           | 0,08             | PA5537 -               | -1,25           | ND              | ND               |
| PA1751 -               | 0,11            | ND              | ND               | PA3802 hisS            | -0,03           | 0,01            | 0,06             | PA5541 pyrQ            | -0,65           | ND              | ND               |
| PA1752 -               | 0,46            | 0,07            | -0,26            | PA3803 gcpE            | 0,01            | -0,09           | -0,26            | PA5542 -               | 0,46            | ND              | ND               |
| PA1753 -               | 0,79            | ND              | ND               | PA3804 -               | -0,03           | -0,12           | -0,31            | PA5543 -               | 0,24            | ND              | ND               |
| PA1754 cysB            | -0,09           | 0,00            | 0,10             | PA3805 pilF            | -0,06           | -0,23           | -0,58            | PA5544 -               | 0,13            | ND              | ND               |
| PA1755 -               | 0,31            | ND              | ND               | PA3806 -               | -0,33           | 0,01            | 0,36             | PA5545 -               | -0,19           | 0,86            | 2,64             |
| PA1756 cysH            | 1,01            | 0,50            | 0,42             | PA3807 ndk             | -0,42           | -0,14           | 0,01             | PA5546 -               | -0,32           | ND              | ND               |
| PA1757 thrH            | 0,63            | 0,20            | -0,05            | PA3808 -               | -0,23           | -0,01           | 0,19             | PA5547 -               | -0,84           | ND              | ND               |
| PA1758 pabB            | 0,16            | 0,22            | 0,46             | PA3809 fdx2            | -0,01           | ND              | ND               | PA5548 -               | -0,06           | ND              | ND               |
| PA1759 -               | 0,61            | ND              | ND               | PA3810 hscA            | -0,36           | 0,08            | 0,57             | PA5549 glmS            | 0,09            | -0,07           | -0,30            |
| PA1760 -               | 1,28            | 0,83            | 1,07             | PA3811 hscB            | -0,32           | -0,06           | 0,15             | PA5550 glmR            | 0,58            | -0,06           | -0,76            |
| PA1761 -               | 0,92            | ND              | ND               | PA3812 iscA            | -0,32           | 0,07            | 0,51             | PA5551 -               | 0,06            | ND              | ND               |
| PA1762 -               | 0,93            | ND              | ND               | PA3813 iscU            | -0,43           | -0,10           | 0,13             | PA5552 glmU            | -0,10           | 0,10            | 0,38             |
| PA1763 -               | 0,29            | ND              | ND               | PA3814 iscS            | -0,44           | -0,16           | -0,01            | PA5553 atpC            | -0,14           | 0,16            | 0,60             |
| PA1766 -               | 0,78            | 0,64            | 1,04             | PA3815 iscR            | 0,03            | 0,05            | 0,12             | PA5554 atpD            | -0,22           | 0,15            | 0,66             |
| PA1767 -               | 0,74            | 0,57            | 0,87             | PA3816 cysE            | -0,66           | -0,19           | 0,11             | PA5555 atpG            | -0,16           | 0,17            | 0,65             |

| ID – Gene <sup>a</sup> | TC <sup>b</sup> | PC <sup>c</sup> | PTV <sup>d</sup> | ID – Gene <sup>a</sup> | TC <sup>b</sup> | PC <sup>c</sup> | PTV <sup>d</sup> | ID – Gene <sup>a</sup> | TC <sup>b</sup> | PC <sup>c</sup> | PTV <sup>d</sup> |
|------------------------|-----------------|-----------------|------------------|------------------------|-----------------|-----------------|------------------|------------------------|-----------------|-----------------|------------------|
| PA1768 -               | 1,10            | 0,44            | 0,16             | PA3817 -               | -0,46           | -0,19           | -0,08            | PA5556 atpA            | -0,20           | 0,19            | 0,74             |
| PA1769 -               | 0,50            | 0,38            | 0,57             | PA3818 -               | 0,18            | -0,33           | -1,11            | PA5557 atpH            | -0,11           | 0,18            | 0,62             |
| PA1770 ppsA            | 0,47            | 0,30            | 0,40             | PA3819 -               | -0,10           | -0,30           | -0,76            | PA5558 atpF            | -0,15           | 0,23            | 0,81             |
| PA1771 estX            | 0,69            | 0,58            | 0,96             | PA3820 secF            | -0,41           | -0,11           | 0,08             | PA5559 atpE            | -0,15           | ND              | ND               |
| PA1772 -               | 0,13            | 0,07            | 0,08             | PA3821 secD            | -0,37           | -0,23           | -0,27            | PA5560 atpB            | 0,16            | 0,13            | 0,20             |
| PA1773 cmaX            | 0,43            | ND              | ND               | PA3822 -               | -0,48           | -0,28           | -0,30            | PA5561 atpI            | 0,75            | ND              | ND               |
| PA1774 crfX            | 1,15            | ND              | ND               | PA3823 tgt             | -0,18           | -0,06           | 0,01             | PA5562 spoOJ           | -0,38           | -0,19           | -0,16            |
| PA1775 cmpX            | 1,05            | 0,31            | -0,18            | PA3824 queA            | 0,13            | -0,10           | -0,41            | PA5563 soj             | -0,40           | -0,01           | 0,37             |
| PA1776 sigX            | 0,86            | 0,24            | -0,19            | PA3824.1 -             | 0,85            | ND              | ND               | PA5564 gidB            | -0,17           | -0,12           | -0,18            |
| PA1777 oprF            | 0,69            | 0,51            | 0,76             | PA3825 -               | -0,78           | ND              | ND               | PA5565 gidA            | -0,14           | -0,11           | -0,18            |
| PA1778 cobA            | 0,49            | ND              | ND               | PA3826 -               | 0,15            | ND              | ND               | PA5566 -               | -1,14           | ND              | ND               |
| PA1787 acnB            | 0,30            | 0,22            | 0,32             | PA3827 -               | -0,17           | -0,03           | 0,07             | PA5567 -               | -0,11           | 0,07            | 0,32             |
| PA1788 -               | 1,12            | 0,46            | 0,20             | PA3828 -               | 0,06            | -0,08           | -0,28            | PA5568 -               | -0,05           | 0,21            | 0,66             |
| PA1789 -               | -0,21           | -0,01           | 0,18             | PA3829 -               | -1,14           | ND              | ND               | PA5569 rnpA            | 0,04            | 0,00            | -0,02            |
| PA1790 -               | 1,34            | 0,38            | -0,25            | PA3830 -               | -0,54           | ND              | ND               | PA5570 rpmH            | -0,10           | 0,12            | 0,45             |

**a** ID and name of the gene according *Pseudomonas* Genome Database [1]. **b** TC, transcript change **c** PC, protein change **d** PTV, postranscriptional variation parameter. ND, not detected transcript or protein.

- Winsor GL, Griffiths EJ, Lo R, Dhillon BK, Shay JA, Brinkman FS: **Enhanced annotations and features for comparing thousands of *Pseudomonas* Geneomes in the *Pseudomonas* genome database.** *Nucleic Acids Res* 2016, **44**:D646-653.
